# Supplementary material for: Transcriptome Dynamics Underlying Planticine®-Induced Defense Responses of Tomato (Solanum lycopersicum L.) to Biotic Stresses
Source: MDPI journal article supplement (doi:10.3390/ijms24076494), 2023-03-30

**Supplementary Figure S3.** Visualization of KEGG MAPK signaling pathway - plant pathway. Differentially expressed genes (DEGs) were indicated in green boxes.

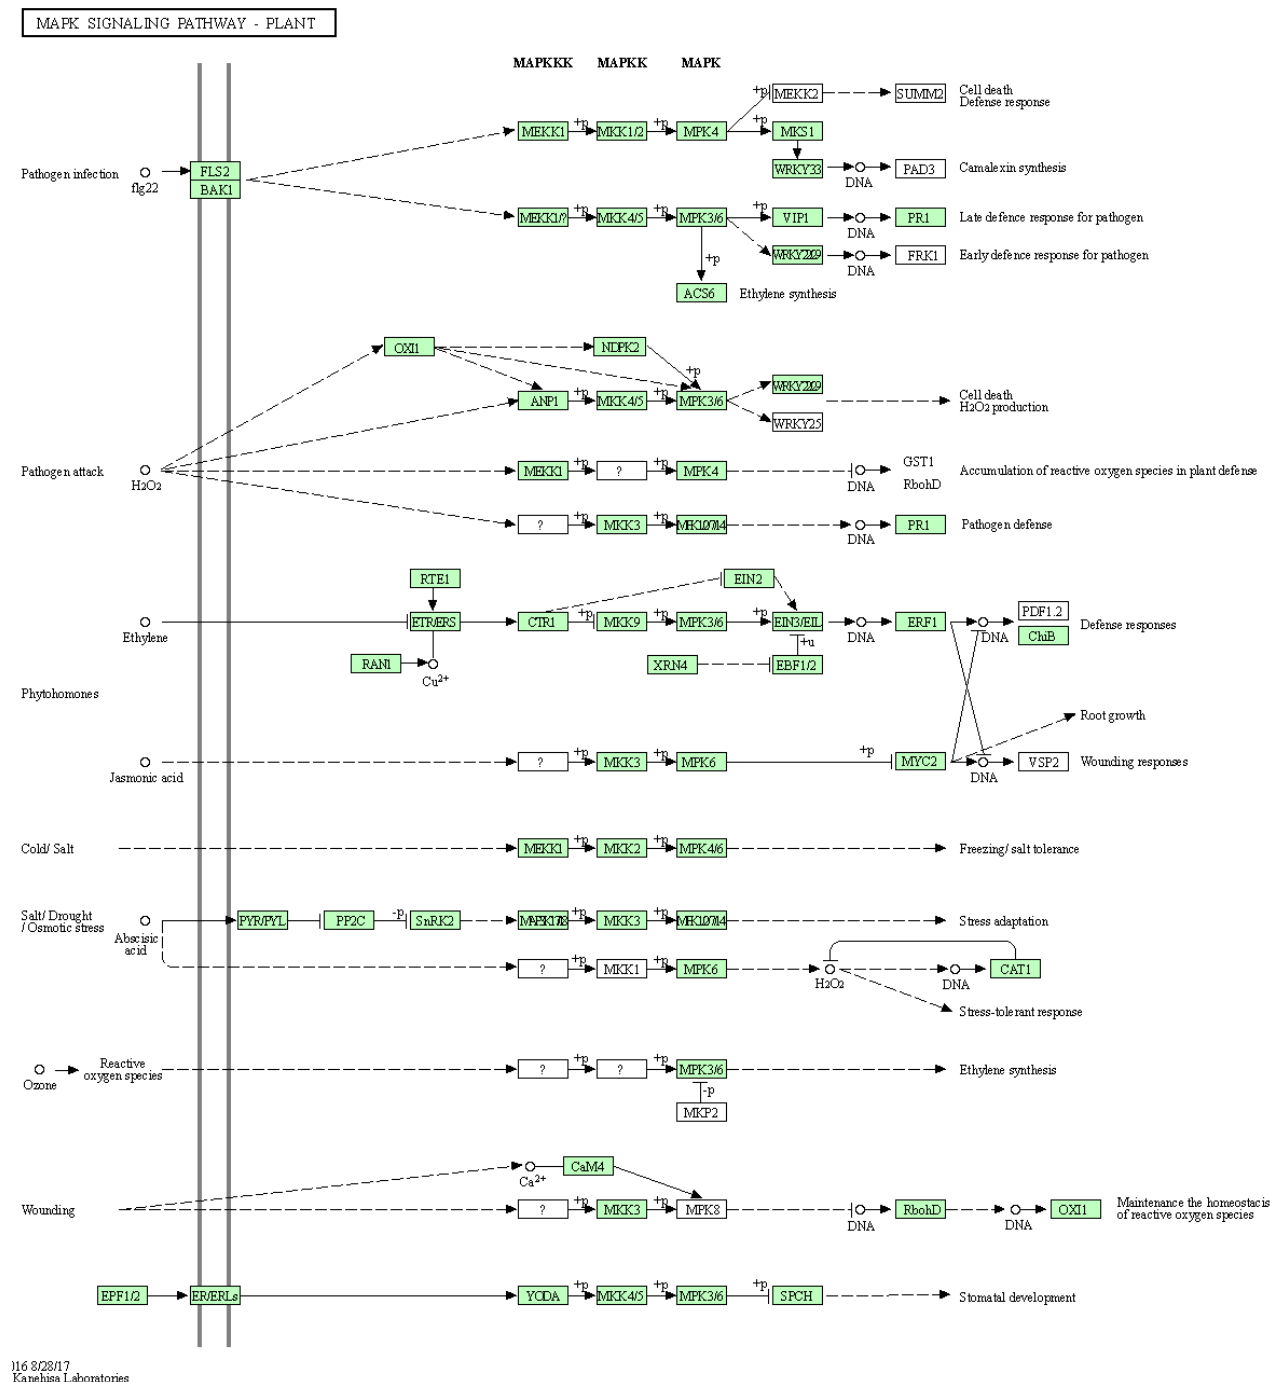

Supplement: s1 [file s1]
