# Supplementary material for: Transcriptome Dynamics Underlying Planticine®-Induced Defense Responses of Tomato (Solanum lycopersicum L.) to Biotic Stresses
Source: MDPI journal article supplement (doi:10.3390/ijms24076494), 2023-03-30
Supplement: s1 [file s1]

**Supplementary Table S1.** Sequencing statistics of 6 transcriptome libraries and mapping details

| Treatment   | Biological replicate | Reads       | Bases (Gbp) | GC (%) | Q30 (%) | Clean reads | Total mapped to tomato genome | Uniquely mapped to genes | Multiple mapped to genes |
|-------------|----------------------|-------------|-------------|--------|---------|-------------|-------------------------------|--------------------------|--------------------------|
| Control     | 1                    | 51,362,287  | 7.2         | 43     | 96.9    | 51,359,636  | 49,413,106 (96.21%)           | 43,088,787               | 1,042,384                |
|             | 2                    | 43,216,573  | 6.1         | 43     | 96.6    | 43,214,100  | 41,839,892 (96.82%)           | 36,666,846               | 857,894                  |
|             | 3                    | 46,403,101  | 6.6         | 43     | 96.6    | 46,400,573  | 44,706,952 (96.35%)           | 38,941,574               | 938,338                  |
| Planticine® | 1                    | 46,963,609  | 6.6         | 42     | 96.7    | 46,960,150  | 45,283,673 (96.43%)           | 39,577,103               | 924,448                  |
|             | 2                    | 47,960,977  | 6.8         | 42     | 96.7    | 47,957,642  | 46,221,575 (96.38%)           | 40,492,001               | 917,296                  |
|             | 3                    | 53,281,554  | 7.5         | 42     | 96.6    | 53,277,130  | 51,508,329 (96.68%)           | 45,410,800               | 1,016,350                |
| Average     |                      | 48,198,017  | 6.8         |        |         | 48,194,872  |                               |                          |                          |
| Total       |                      | 289,188,101 | 40.8        |        |         | 289,169,231 |                               |                          |                          |

GC – the overall %GC of all bases in all sequences, Q30 – ratio of bases that have Phred quality score over 30, Clean reads refer adaptors trimmed and low-quality sequence filtered reads
