# Supplementary material for: Transcriptome Dynamics Underlying Planticine®-Induced Defense Responses of Tomato (Solanum lycopersicum L.) to Biotic Stresses
Source: Int J Mol Sci. 2023 Mar 30;24(7):6494. doi: 10.3390/ijms24076494 (PMC10095179; doi:10.3390/ijms24076494)
Supplement: Supplementary file 1 [file ijms-24-06494-s001.zip]

Archive with 6 entries (6 files):
- Supplementary data S1_DEGs with_Trinotate_annotation.xlsx
- Supplementary data S2_ GO_enrichment.xlsx
- Supplementary Figure S1_Pearson correlation.pdf
- Supplementary Figure S2_Plant-pathogen interaction pathway.pdf
- Supplementary Figure S3_MAPK signaling pathway.pdf
- Supplementary Table S1_Sequencing statistics.pdf
