# Supplementary material for: Transcriptome Dynamics Underlying Planticine®-Induced Defense Responses of Tomato (Solanum lycopersicum L.) to Biotic Stresses
Source: Int J Mol Sci. 2023 Mar 30;24(7):6494. doi: 10.3390/ijms24076494 (PMC10095179; doi:10.3390/ijms24076494)
Supplement: Supplementary file 1 [file ijms-24-06494-s001.zip › Supplementary data S1_DEGs with_Trinotate_annotation.xlsx]

## Sheet: all_genes
Gene	BaseMean	Estimated_FoldChange	log2_Estimated_FoldChange2	Wald_stat	p_value_not_adjusted	FDR_adjusted_p_value	Standard_error_estimate	Sample_D1_I2_N_A_raw_counts	Sample_D1_I2_N_B_raw_counts	Sample_D1_I2_N_C_raw_counts	Sample_D1_K_N_A_raw_counts	Sample_D1_K_N_B_raw_counts	Sample_D1_K_N_C_raw_counts	Sample_D1_I2_N_A_normalized_counts	Sample_D1_I2_N_B_normalized_counts	Sample_D1_I2_N_C_normalized_counts	Sample_D1_K_N_A_normalized_counts	Sample_D1_K_N_B_normalized_counts	Sample_D1_K_N_C_normalized_counts	type	gene_biotype	seqid	start	end	strand	ncbi_id	Blastx_gene_name	Blastx_full_name	Blastx_query_range	Blastx_hit_range	Blastx_%_of_identity	Blastx_Evalue	Blastx_related_organisms	Blastp_gene_name	Blastp_full_name	Blastp_query_range	Blastp_hit_range	Blastp_%_of_identity	Blastp_Evalue	Blastp_related_organisms	Pfam_info	Eggnog_info	Gene_ontology_BLASTX	Gene_ontology_BLASTP	Gene_ontology_PFAM	Kegg_info
Solyc07g054080.2	982.2	1.84	-0.88	4.55219	5.30894595500332e-06	0.00010091832420112	0.19	837	684	618	1485	1173	1057	845.93	675.57	556.5	1407.15	1341.59	1066.47	gene	protein_coding	7	62613220	62616150	+		RMA1_CAPAN	E3 ubiquitin-protein ligase RMA1H1	Q:30-737	H:2-243	85.537	E:7.8e-142	Eukaryota; Viridiplantae; Streptophyta; Embryophyta; Tracheophyta; Spermatophyta; Magnoliopsida; eudicotyledons; Gunneridae; Pentapetalae; asterids; lamiids; Solanales; Solanaceae; Solanoideae; Capsiceae; Capsicum	RMA1_CAPAN	E3 ubiquitin-protein ligase RMA1H1	Q:10-245	H:2-243	85.537	E:9.71e-154	Eukaryota; Viridiplantae; Streptophyta; Embryophyta; Tracheophyta; Spermatophyta; Magnoliopsida; eudicotyledons; Gunneridae; Pentapetalae; asterids; lamiids; Solanales; Solanaceae; Solanoideae; Capsiceae; Capsicum	PF13920.7^zf-C3HC4_3^Zinc finger, C3HC4 type (RING finger)^48-103^E:3e-07`PF13639.7^zf-RING_2^Ring finger domain^48-98^E:7e-07`PF14634.7^zf-RING_5^zinc-RING finger domain^48-98^E:1.8e-06`PF13445.7^zf-RING_UBOX^RING-type zinc-finger^49-80^E:8.1e-08`PF00097.26^zf-C3HC4^Zinc finger, C3HC4 type (RING finger)^49-97^E:2.9e-08	.	GO:0005789^cellular_component^endoplasmic reticulum membrane`GO:0016021^cellular_component^integral component of membrane`GO:0046872^molecular_function^metal ion binding`GO:0004842^molecular_function^ubiquitin-protein transferase activity`GO:0043161^biological_process^proteasome-mediated ubiquitin-dependent protein catabolic process`GO:0016567^biological_process^protein ubiquitination`GO:0009409^…	GO:0005789^cellular_component^endoplasmic reticulum membrane`GO:0016021^cellular_component^integral component of membrane`GO:0046872^molecular_function^metal ion binding`GO:0004842^molecular_function^ubiquitin-protein transferase activity`GO:0043161^biological_process^proteasome-mediated ubiquitin-dependent protein catabolic process`GO:0016567^biological_process^protein ubiquitination`GO:0009409^…	GO:0046872^molecular_function^metal ion binding	KEGG:cann:107855034`KO:K10666
Solyc12g010540.1	3330.64	0.51	0.96	-4.55032	5.35643757306801e-06	0.000101728448612444	0.21	4348	4567	4782	1849	2687	1930	4394.41	4510.73	4306.13	1752.07	3073.2	1947.3	gene	protein_coding	12	3531562	3532860	-	101251855	GAE1_ARATH	UDP-glucuronate 4-epimerase 1	Q:1-1281	H:1-424	81.075	E:0	Eukaryota; Viridiplantae; Streptophyta; Embryophyta; Tracheophyta; Spermatophyta; Magnoliopsida; eudicotyledons; Gunneridae; Pentapetalae; rosids; malvids; Brassicales; Brassicaceae; Camelineae; Arabidopsis	GAE1_ARATH	UDP-glucuronate 4-epimerase 1	Q:1-427	H:1-424	81.075	E:0	Eukaryota; Viridiplantae; Streptophyta; Embryophyta; Tracheophyta; Spermatophyta; Magnoliopsida; eudicotyledons; Gunneridae; Pentapetalae; rosids; malvids; Brassicales; Brassicaceae; Camelineae; Arabidopsis	PF04321.18^RmlD_sub_bind^RmlD substrate binding domain^91-274^E:8.9e-14`PF01370.22^Epimerase^NAD dependent epimerase/dehydratase family^93-327^E:5.8e-49`PF02719.16^Polysacc_synt_2^Polysaccharide biosynthesis protein^93-298^E:2e-08`PF16363.6^GDP_Man_Dehyd^GDP-mannose 4,6 dehydratase^94-411^E:4e-52`PF01073.20^3Beta_HSD^3-beta hydroxysteroid dehydrogenase/isomerase family^94-322^E:1.4e-14`PF07993.13…	.	GO:0005768^cellular_component^endosome`GO:0005794^cellular_component^Golgi apparatus`GO:0032580^cellular_component^Golgi cisterna membrane`GO:0000138^cellular_component^Golgi trans cisterna`GO:0016021^cellular_component^integral component of membrane`GO:0005802^cellular_component^trans-Golgi network`GO:0050378^molecular_function^UDP-glucuronate 4-epimerase activity`GO:0071456^biological_process^c…	GO:0005768^cellular_component^endosome`GO:0005794^cellular_component^Golgi apparatus`GO:0032580^cellular_component^Golgi cisterna membrane`GO:0000138^cellular_component^Golgi trans cisterna`GO:0016021^cellular_component^integral component of membrane`GO:0005802^cellular_component^trans-Golgi network`GO:0050378^molecular_function^UDP-glucuronate 4-epimerase activity`GO:0071456^biological_process^c…	GO:0003824^molecular_function^catalytic activity`GO:0050662^molecular_function^obsolete coenzyme binding`GO:0003854^molecular_function^3-beta-hydroxy-delta5-steroid dehydrogenase activity`GO:0016616^molecular_function^oxidoreductase activity, acting on the CH-OH group of donors, NAD or NADP as acceptor`GO:0006694^biological_process^steroid biosynthetic process`GO:0055114^biological_process^oxidat…	KEGG:ath:AT4G30440`KO:K08679
Solyc11g069430.2	13620.3	1.45	-0.54	4.54996	5.36554878805204e-06	0.000101808849367475	0.12	12284	10727	11436	18188	14312	14679	12415.1	10594.8	10298	17234.5	16369	14810.5	gene	protein_coding	11	54305254	54308455	-		PIP27_ARATH	Aquaporin PIP2-7	Q:1-252	H:195-278	88.095	E:2.49e-44	Eukaryota; Viridiplantae; Streptophyta; Embryophyta; Tracheophyta; Spermatophyta; Magnoliopsida; eudicotyledons; Gunneridae; Pentapetalae; rosids; malvids; Brassicales; Brassicaceae; Camelineae; Arabidopsis	.	.	.	.	.	.	.	.	.	GO:0046658^cellular_component^anchored component of plasma membrane`GO:0016021^cellular_component^integral component of membrane`GO:0005634^cellular_component^nucleus`GO:0005886^cellular_component^plasma membrane`GO:0009506^cellular_component^plasmodesma`GO:0005773^cellular_component^vacuole`GO:0003729^molecular_function^mRNA binding`GO:0015250^molecular_function^water channel activity`GO:0009737…	.	.	KEGG:ath:AT4G35100`KO:K09872
Solyc04g056580.3	6061.92	1.33	-0.41	4.54769	5.42374671758274e-06	0.000102819656211977	0.09	5384	5260	5523	7575	6221	6411	5441.46	5195.19	4973.39	7177.88	7115.13	6468.46	gene	protein_coding	4	54482639	54485113	+	101253079	LPXD_PARPJ	UDP-3-O-acylglucosamine N-acyltransferase {ECO:0000255|HAMAP-Rule:MF_00523}	Q:202-339	H:37-84	33.333	E:2	Bacteria; Proteobacteria; Betaproteobacteria; Burkholderiales; Burkholderiaceae; Paraburkholderia	LPXD_PARPJ	UDP-3-O-acylglucosamine N-acyltransferase {ECO:0000255|HAMAP-Rule:MF_00523}	Q:68-113	H:37-84	33.333	E:1.8	Bacteria; Proteobacteria; Betaproteobacteria; Burkholderiales; Burkholderiaceae; Paraburkholderia	.	COG1044^Catalyzes the N-acylation of UDP-3-O-acylglucosamine using 3-hydroxyacyl-ACP as the acyl donor. Is involved in the biosynthesis of lipid A, a phosphorylated glycolipid that anchors the lipopolysaccharide to the outer membrane of the cell (By similarity)	GO:0016410^molecular_function^N-acyltransferase activity`GO:0009245^biological_process^lipid A biosynthetic process	GO:0016410^molecular_function^N-acyltransferase activity`GO:0009245^biological_process^lipid A biosynthetic process	.	KEGG:bpy:Bphyt_2445`KO:K02536
Solyc09g009830.3	4054.32	1.4	-0.49	4.54654	5.45353616638593e-06	0.000103290568842838	0.11	3507	3351	3635	5000	4519	4254	3544.43	3309.71	3273.27	4737.88	5168.5	4292.12	gene	protein_coding	9	3324979	3330300	+		.	.	.	.	.	.	.	.	.	.	.	.	.	.	.	.	.	.	.	.
Solyc05g016310.1	295.41	0.35	1.51	-4.54527	5.48649402810837e-06	0.000103820583277133	0.33	395	427	545	104	217	113	399.22	421.74	490.77	98.55	248.19	114.01	gene	protein_coding	5	15500178	15501758	+	101257664	APF2_ARATH	Aspartyl protease family protein 2 {ECO:0000305}	Q:181-1572	H:52-485	35.76	E:7.11e-72	Eukaryota; Viridiplantae; Streptophyta; Embryophyta; Tracheophyta; Spermatophyta; Magnoliopsida; eudicotyledons; Gunneridae; Pentapetalae; rosids; malvids; Brassicales; Brassicaceae; Camelineae; Arabidopsis	APF2_ARATH	Aspartyl protease family protein 2 {ECO:0000305}	Q:61-524	H:52-485	35.76	E:5.81e-74	Eukaryota; Viridiplantae; Streptophyta; Embryophyta; Tracheophyta; Spermatophyta; Magnoliopsida; eudicotyledons; Gunneridae; Pentapetalae; rosids; malvids; Brassicales; Brassicaceae; Camelineae; Arabidopsis	PF00026.24^Asp^Eukaryotic aspartyl protease^160-213^E:4.7e-08`PF14543.7^TAXi_N^Xylanase inhibitor N-terminal^161-340^E:5.3e-53`PF00026.24^Asp^Eukaryotic aspartyl protease^320-520^E:2.3e-09`PF14541.7^TAXi_C^Xylanase inhibitor C-terminal^367-519^E:6.7e-33	.	GO:0009505^cellular_component^plant-type cell wall`GO:0004190^molecular_function^aspartic-type endopeptidase activity`GO:0030163^biological_process^protein catabolic process`GO:0006508^biological_process^proteolysis`GO:0080167^biological_process^response to karrikin	GO:0009505^cellular_component^plant-type cell wall`GO:0004190^molecular_function^aspartic-type endopeptidase activity`GO:0030163^biological_process^protein catabolic process`GO:0006508^biological_process^proteolysis`GO:0080167^biological_process^response to karrikin	.	KEGG:ath:AT1G01300`KO:K22683
Solyc07g006630.3	5420.78	1.43	-0.51	4.53764	5.68872731319034e-06	0.000107549924348649	0.11	4501	4562	4835	6816	6146	5578	4549.04	4505.79	4353.85	6458.67	7029.35	5627.99	gene	protein_coding	7	1494884	1496758	-		COL5_ARATH	Zinc finger protein CONSTANS-LIKE 5	Q:16-768	H:1-237	45.174	E:2.64e-59	Eukaryota; Viridiplantae; Streptophyta; Embryophyta; Tracheophyta; Spermatophyta; Magnoliopsida; eudicotyledons; Gunneridae; Pentapetalae; rosids; malvids; Brassicales; Brassicaceae; Camelineae; Arabidopsis	COL5_ARATH	Zinc finger protein CONSTANS-LIKE 5	Q:6-256	H:1-237	45.174	E:1.4e-63	Eukaryota; Viridiplantae; Streptophyta; Embryophyta; Tracheophyta; Spermatophyta; Magnoliopsida; eudicotyledons; Gunneridae; Pentapetalae; rosids; malvids; Brassicales; Brassicaceae; Camelineae; Arabidopsis	PF00643.25^zf-B_box^B-box zinc finger^30-66^E:2.1e-05`PF00643.25^zf-B_box^B-box zinc finger^65-111^E:1.7e-06	.	GO:0005634^cellular_component^nucleus`GO:0003700^molecular_function^DNA-binding transcription factor activity`GO:0008270^molecular_function^zinc ion binding`GO:0009909^biological_process^regulation of flower development`GO:0006355^biological_process^regulation of transcription, DNA-templated	GO:0005634^cellular_component^nucleus`GO:0003700^molecular_function^DNA-binding transcription factor activity`GO:0008270^molecular_function^zinc ion binding`GO:0009909^biological_process^regulation of flower development`GO:0006355^biological_process^regulation of transcription, DNA-templated	GO:0008270^molecular_function^zinc ion binding	KEGG:ath:AT5G57660
Solyc09g010530.3	2371.97	1.63	-0.7	4.53669	5.71436098361322e-06	0.000107936780497715	0.16	2030	1714	1856	3593	2525	2501	2051.67	1692.88	1671.3	3404.64	2887.91	2523.41	gene	protein_coding	9	3902649	3907865	-	101249848	CHX20_ARATH	Cation/H(+) antiporter 20	Q:128-673	H:226-405	65.385	E:1.78e-64	Eukaryota; Viridiplantae; Streptophyta; Embryophyta; Tracheophyta; Spermatophyta; Magnoliopsida; eudicotyledons; Gunneridae; Pentapetalae; rosids; malvids; Brassicales; Brassicaceae; Camelineae; Arabidopsis	CHX18_ARATH	Cation/H(+) antiporter 18	Q:1-224	H:185-399	56.696	E:3.42e-76	Eukaryota; Viridiplantae; Streptophyta; Embryophyta; Tracheophyta; Spermatophyta; Magnoliopsida; eudicotyledons; Gunneridae; Pentapetalae; rosids; malvids; Brassicales; Brassicaceae; Camelineae; Arabidopsis	PF00999.22^Na_H_Exchanger^Sodium/hydrogen exchanger family^3-222^E:1.6e-26	.	GO:0012505^cellular_component^endomembrane system`GO:0005783^cellular_component^endoplasmic reticulum`GO:0016021^cellular_component^integral component of membrane`GO:0015299^molecular_function^solute:proton antiporter activity`GO:0030007^biological_process^cellular potassium ion homeostasis`GO:0015672^biological_process^monovalent inorganic cation transport`GO:0006813^biological_process^potassium…	GO:0012505^cellular_component^endomembrane system`GO:0016021^cellular_component^integral component of membrane`GO:0005770^cellular_component^late endosome`GO:0015299^molecular_function^solute:proton antiporter activity`GO:0015672^biological_process^monovalent inorganic cation transport`GO:0006813^biological_process^potassium ion transport`GO:0006885^biological_process^regulation of pH	GO:0015299^molecular_function^solute:proton antiporter activity`GO:0006812^biological_process^cation transport`GO:0055085^biological_process^transmembrane transport`GO:0016021^cellular_component^integral component of membrane	KEGG:ath:AT5G41610
Solyc09g059990.1	160.73	2.23	-1.16	4.53626	5.72606505591372e-06	0.000108060063152831	0.26	116	79	115	275	145	237	117.24	78.03	103.56	260.58	165.84	239.12	gene	protein_coding	9	57259487	57260230	+	101254727	LUL4_ARATH	Probable E3 ubiquitin-protein ligase LUL4	Q:595-738	H:302-350	40.816	E:0.000226	Eukaryota; Viridiplantae; Streptophyta; Embryophyta; Tracheophyta; Spermatophyta; Magnoliopsida; eudicotyledons; Gunneridae; Pentapetalae; rosids; malvids; Brassicales; Brassicaceae; Camelineae; Arabidopsis	LUL4_ARATH	Probable E3 ubiquitin-protein ligase LUL4	Q:183-246	H:289-350	36.923	E:4.51e-05	Eukaryota; Viridiplantae; Streptophyta; Embryophyta; Tracheophyta; Spermatophyta; Magnoliopsida; eudicotyledons; Gunneridae; Pentapetalae; rosids; malvids; Brassicales; Brassicaceae; Camelineae; Arabidopsis	PF13920.7^zf-C3HC4_3^Zinc finger, C3HC4 type (RING finger)^196-240^E:1.2e-10`PF00097.26^zf-C3HC4^Zinc finger, C3HC4 type (RING finger)^199-236^E:1.1e-05	.	GO:0046872^molecular_function^metal ion binding`GO:0061630^molecular_function^ubiquitin protein ligase activity`GO:0004842^molecular_function^ubiquitin-protein transferase activity`GO:0016567^biological_process^protein ubiquitination	GO:0046872^molecular_function^metal ion binding`GO:0061630^molecular_function^ubiquitin protein ligase activity`GO:0004842^molecular_function^ubiquitin-protein transferase activity`GO:0016567^biological_process^protein ubiquitination	GO:0046872^molecular_function^metal ion binding	KEGG:ath:AT3G06140
Solyc12g006690.2	145.62	2.08	-1.06	4.53459	5.77163956284641e-06	0.000108821735280696	0.23	107	89	98	235	131	215	108.14	87.9	88.25	222.68	149.83	216.93	gene	protein_coding	12	1151914	1155156	-		PID2_ARATH	Protein kinase PINOID 2	Q:41-805	H:206-525	53.583	E:1.31e-102	Eukaryota; Viridiplantae; Streptophyta; Embryophyta; Tracheophyta; Spermatophyta; Magnoliopsida; eudicotyledons; Gunneridae; Pentapetalae; rosids; malvids; Brassicales; Brassicaceae; Camelineae; Arabidopsis	PID2_ARATH	Protein kinase PINOID 2	Q:1-268	H:193-525	55.988	E:1.26e-118	Eukaryota; Viridiplantae; Streptophyta; Embryophyta; Tracheophyta; Spermatophyta; Magnoliopsida; eudicotyledons; Gunneridae; Pentapetalae; rosids; malvids; Brassicales; Brassicaceae; Camelineae; Arabidopsis	PF00069.26^Pkinase^Protein kinase domain^1-49^E:1.5e-14`PF07714.18^PK_Tyr_Ser-Thr^Protein tyrosine and serine/threonine kinase^3-48^E:3.3e-06`PF00069.26^Pkinase^Protein kinase domain^110-220^E:3.9e-22`PF07714.18^PK_Tyr_Ser-Thr^Protein tyrosine and serine/threonine kinase^115-183^E:8.2e-06	.	GO:0005737^cellular_component^cytoplasm`GO:0005634^cellular_component^nucleus`GO:0005886^cellular_component^plasma membrane`GO:0005524^molecular_function^ATP binding`GO:0016301^molecular_function^kinase activity`GO:0004674^molecular_function^protein serine/threonine kinase activity`GO:0009734^biological_process^auxin-activated signaling pathway`GO:0048825^biological_process^cotyledon development`…	GO:0005737^cellular_component^cytoplasm`GO:0005634^cellular_component^nucleus`GO:0005886^cellular_component^plasma membrane`GO:0005524^molecular_function^ATP binding`GO:0016301^molecular_function^kinase activity`GO:0004674^molecular_function^protein serine/threonine kinase activity`GO:0009734^biological_process^auxin-activated signaling pathway`GO:0048825^biological_process^cotyledon development`…	GO:0004672^molecular_function^protein kinase activity`GO:0005524^molecular_function^ATP binding`GO:0006468^biological_process^protein phosphorylation	KEGG:ath:AT2G26700
Solyc08g065940.3	3545.53	1.76	-0.82	4.53304	5.8141656707166e-06	0.000109524608194221	0.18	2891	2360	2712	4956	4681	3497	2921.86	2330.92	2442.12	4696.18	5353.79	3528.34	gene	protein_coding	8	54359527	54360489	-		C3H20_ARATH	Zinc finger CCCH domain-containing protein 20	Q:4-957	H:1-358	56.284	E:6.15e-107	Eukaryota; Viridiplantae; Streptophyta; Embryophyta; Tracheophyta; Spermatophyta; Magnoliopsida; eudicotyledons; Gunneridae; Pentapetalae; rosids; malvids; Brassicales; Brassicaceae; Camelineae; Arabidopsis	C3H49_ARATH	Zinc finger CCCH domain-containing protein 49	Q:2-319	H:1-355	55.923	E:3.54e-117	Eukaryota; Viridiplantae; Streptophyta; Embryophyta; Tracheophyta; Spermatophyta; Magnoliopsida; eudicotyledons; Gunneridae; Pentapetalae; rosids; malvids; Brassicales; Brassicaceae; Camelineae; Arabidopsis	PF00642.25^zf-CCCH^Zinc finger C-x8-C-x5-C-x3-H type (and similar)^119-138^E:1.5e-05`PF14608.7^zf-CCCH_2^RNA-binding, Nab2-type zinc finger^119-138^E:2.8`PF14608.7^zf-CCCH_2^RNA-binding, Nab2-type zinc finger^153-169^E:0.64	.	GO:0005886^cellular_component^plasma membrane`GO:0003677^molecular_function^DNA binding`GO:0003700^molecular_function^DNA-binding transcription factor activity`GO:0046872^molecular_function^metal ion binding`GO:0006355^biological_process^regulation of transcription, DNA-templated`GO:0006979^biological_process^response to oxidative stress	GO:0005886^cellular_component^plasma membrane`GO:0003677^molecular_function^DNA binding`GO:0003700^molecular_function^DNA-binding transcription factor activity`GO:0046872^molecular_function^metal ion binding`GO:0006355^biological_process^regulation of transcription, DNA-templated	GO:0046872^molecular_function^metal ion binding	KEGG:ath:AT4G29190
Solyc06g068320.3	2934.14	0.77	0.37	-4.53268	5.824088126134e-06	0.000109612594561469	0.08	3188	3302	3829	2626	2322	2507	3222.03	3261.31	3447.96	2488.33	2655.74	2529.47	gene	protein_coding	6	42436681	42444476	-	101260238	SYPC_ARATH	Proline--tRNA ligase, cytoplasmic {ECO:0000305}	Q:3-62	H:511-530	95	E:6.25e-06	Eukaryota; Viridiplantae; Streptophyta; Embryophyta; Tracheophyta; Spermatophyta; Magnoliopsida; eudicotyledons; Gunneridae; Pentapetalae; rosids; malvids; Brassicales; Brassicaceae; Camelineae; Arabidopsis	.	.	.	.	.	.	.	.	.	GO:0017101^cellular_component^aminoacyl-tRNA synthetase multienzyme complex`GO:0005737^cellular_component^cytoplasm`GO:0005829^cellular_component^cytosol`GO:0009506^cellular_component^plasmodesma`GO:0005524^molecular_function^ATP binding`GO:0004827^molecular_function^proline-tRNA ligase activity`GO:0006433^biological_process^prolyl-tRNA aminoacylation	.	.	KEGG:ath:AT3G62120`KO:K01881
Solyc06g069690.3	347.51	0.55	0.86	-4.5324	5.83177593725452e-06	0.000109658403029168	0.19	392	422	588	225	252	239	396.18	416.8	529.49	213.2	288.22	241.14	gene	protein_coding	6	43520116	43520582	-		APRR1_ARATH	Two-component response regulator-like APRR1	Q:1-414	H:462-614	52.258	E:3.21e-37	Eukaryota; Viridiplantae; Streptophyta; Embryophyta; Tracheophyta; Spermatophyta; Magnoliopsida; eudicotyledons; Gunneridae; Pentapetalae; rosids; malvids; Brassicales; Brassicaceae; Camelineae; Arabidopsis	APRR1_ARATH	Two-component response regulator-like APRR1	Q:1-138	H:462-614	52.258	E:1.56e-37	Eukaryota; Viridiplantae; Streptophyta; Embryophyta; Tracheophyta; Spermatophyta; Magnoliopsida; eudicotyledons; Gunneridae; Pentapetalae; rosids; malvids; Brassicales; Brassicaceae; Camelineae; Arabidopsis	PF06203.15^CCT^CCT motif^59-101^E:1.4e-16	.	GO:0005634^cellular_component^nucleus`GO:0003677^molecular_function^DNA binding`GO:0003700^molecular_function^DNA-binding transcription factor activity`GO:0007623^biological_process^circadian rhythm`GO:0010031^biological_process^circumnutation`GO:0009908^biological_process^flower development`GO:0010629^biological_process^negative regulation of gene expression`GO:0000160^biological_process^phospho…	GO:0005634^cellular_component^nucleus`GO:0003677^molecular_function^DNA binding`GO:0003700^molecular_function^DNA-binding transcription factor activity`GO:0007623^biological_process^circadian rhythm`GO:0010031^biological_process^circumnutation`GO:0009908^biological_process^flower development`GO:0010629^biological_process^negative regulation of gene expression`GO:0000160^biological_process^phospho…	GO:0005515^molecular_function^protein binding	KEGG:ath:AT5G61380`KO:K12127
Solyc10g006870.1	2050.64	0.61	0.71	-4.52899	5.9265891450833e-06	0.000111340925865147	0.16	2288	2462	3201	1618	1581	1324	2312.42	2431.66	2882.46	1533.18	1808.23	1335.87	gene	protein_coding	10	1289278	1291800	-	104649482	THE1_ARATH	Receptor-like protein kinase THESEUS 1	Q:34-2520	H:8-855	71.934	E:0	Eukaryota; Viridiplantae; Streptophyta; Embryophyta; Tracheophyta; Spermatophyta; Magnoliopsida; eudicotyledons; Gunneridae; Pentapetalae; rosids; malvids; Brassicales; Brassicaceae; Camelineae; Arabidopsis	THE1_ARATH	Receptor-like protein kinase THESEUS 1	Q:12-840	H:8-855	72.17	E:0	Eukaryota; Viridiplantae; Streptophyta; Embryophyta; Tracheophyta; Spermatophyta; Magnoliopsida; eudicotyledons; Gunneridae; Pentapetalae; rosids; malvids; Brassicales; Brassicaceae; Camelineae; Arabidopsis	PF12819.8^Malectin_like^Malectin-like domain^38-387^E:5.1e-39`PF11721.9^Malectin^Malectin domain^212-366^E:7.6e-07`PF00069.26^Pkinase^Protein kinase domain^503-764^E:3.2e-41`PF07714.18^PK_Tyr_Ser-Thr^Protein tyrosine and serine/threonine kinase^504-696^E:5.7e-46	.	GO:0016021^cellular_component^integral component of membrane`GO:0005886^cellular_component^plasma membrane`GO:0009506^cellular_component^plasmodesma`GO:0005524^molecular_function^ATP binding`GO:0004672^molecular_function^protein kinase activity`GO:0004674^molecular_function^protein serine/threonine kinase activity`GO:0009817^biological_process^defense response to fungus, incompatible interaction`…	GO:0016021^cellular_component^integral component of membrane`GO:0005886^cellular_component^plasma membrane`GO:0009506^cellular_component^plasmodesma`GO:0005524^molecular_function^ATP binding`GO:0004672^molecular_function^protein kinase activity`GO:0004674^molecular_function^protein serine/threonine kinase activity`GO:0009817^biological_process^defense response to fungus, incompatible interaction`…	GO:0004672^molecular_function^protein kinase activity`GO:0005524^molecular_function^ATP binding`GO:0006468^biological_process^protein phosphorylation	KEGG:ath:AT5G54380
Solyc03g083680.1	426.13	0.08	3.66	-4.52734	5.97297822618232e-06	0.000112111512173451	0.81	637	738	1106	26	120	26	643.8	728.91	995.94	24.64	137.25	26.23	gene	protein_coding	3	55071897	55072211	+		PLSY1_THEMA	Glycerol-3-phosphate acyltransferase 1 {ECO:0000255|HAMAP-Rule:MF_01043}	Q:168-314	H:138-186	26.531	E:5.1	Bacteria; Thermotogae; Thermotogales; Thermotogaceae; Thermotoga	.	.	.	.	.	.	.	.	COG0344^Catalyzes the transfer of an acyl group from acyl- phosphate (acyl-PO(4)) to glycerol-3-phosphate (G3P) to form lysophosphatidic acid (LPA). This enzyme utilizes acyl-phosphate as fatty acyl donor, but not acyl-CoA or acyl-ACP (By similarity)	GO:0016021^cellular_component^integral component of membrane`GO:0005886^cellular_component^plasma membrane`GO:0043772^molecular_function^acyl-phosphate glycerol-3-phosphate acyltransferase activity`GO:0008654^biological_process^phospholipid biosynthetic process	.	.	KEGG:tma:TM1283`KO:K08591
Solyc10g055390.2	410.02	1.78	-0.84	4.52308	6.09449780200163e-06	0.000114289629940142	0.18	283	279	357	559	547	418	286.02	275.56	321.47	529.69	625.62	421.75	gene	protein_coding	10	56615509	56617788	-	101248337	NFD4_ARATH	Protein NUCLEAR FUSION DEFECTIVE 4 {ECO:0000303|PubMed:16698901}	Q:46-1194	H:12-412	32.439	E:1.13e-44	Eukaryota; Viridiplantae; Streptophyta; Embryophyta; Tracheophyta; Spermatophyta; Magnoliopsida; eudicotyledons; Gunneridae; Pentapetalae; rosids; malvids; Brassicales; Brassicaceae; Camelineae; Arabidopsis	NFD4_ARATH	Protein NUCLEAR FUSION DEFECTIVE 4 {ECO:0000303|PubMed:16698901}	Q:16-398	H:12-412	32.439	E:3.33e-48	Eukaryota; Viridiplantae; Streptophyta; Embryophyta; Tracheophyta; Spermatophyta; Magnoliopsida; eudicotyledons; Gunneridae; Pentapetalae; rosids; malvids; Brassicales; Brassicaceae; Camelineae; Arabidopsis	PF06813.14^Nodulin-like^Nodulin-like^40-286^E:1.9e-95	.	GO:0016021^cellular_component^integral component of membrane`GO:0016020^cellular_component^membrane`GO:0005739^cellular_component^mitochondrion`GO:0000741^biological_process^karyogamy`GO:0010197^biological_process^polar nucleus fusion`GO:0009651^biological_process^response to salt stress	GO:0016021^cellular_component^integral component of membrane`GO:0016020^cellular_component^membrane`GO:0005739^cellular_component^mitochondrion`GO:0000741^biological_process^karyogamy`GO:0010197^biological_process^polar nucleus fusion`GO:0009651^biological_process^response to salt stress	.	KEGG:ath:AT1G31470
Solyc10g051050.2	426.54	0.48	1.07	-4.52143	6.14227462254144e-06	0.000115082186644241	0.24	730	593	456	280	276	242	737.79	585.69	410.62	265.32	315.67	244.17	gene	protein_coding	10	51369427	51372284	+		R1B12_SOLDE	Putative late blight resistance protein homolog R1B-12	Q:199-1836	H:551-1104	35.121	E:1.08e-78	Eukaryota; Viridiplantae; Streptophyta; Embryophyta; Tracheophyta; Spermatophyta; Magnoliopsida; eudicotyledons; Gunneridae; Pentapetalae; asterids; lamiids; Solanales; Solanaceae; Solanoideae; Solaneae; Solanum	R1B12_SOLDE	Putative late blight resistance protein homolog R1B-12	Q:67-612	H:551-1104	35.06	E:1.55e-81	Eukaryota; Viridiplantae; Streptophyta; Embryophyta; Tracheophyta; Spermatophyta; Magnoliopsida; eudicotyledons; Gunneridae; Pentapetalae; asterids; lamiids; Solanales; Solanaceae; Solanoideae; Solaneae; Solanum	PF00931.23^NB-ARC^NB-ARC domain^108-339^E:1.9e-52`PF00560.34^LRR_1^Leucine Rich Repeat^326-341^E:410`PF00560.34^LRR_1^Leucine Rich Repeat^529-540^E:18000`PF00560.34^LRR_1^Leucine Rich Repeat^587-603^E:210`PF00560.34^LRR_1^Leucine Rich Repeat^653-664^E:960	.	GO:0005737^cellular_component^cytoplasm`GO:0016020^cellular_component^membrane`GO:0043531^molecular_function^ADP binding`GO:0005524^molecular_function^ATP binding`GO:0009626^biological_process^plant-type hypersensitive response	GO:0005737^cellular_component^cytoplasm`GO:0016020^cellular_component^membrane`GO:0043531^molecular_function^ADP binding`GO:0005524^molecular_function^ATP binding`GO:0009626^biological_process^plant-type hypersensitive response	GO:0043531^molecular_function^ADP binding`GO:0005515^molecular_function^protein binding	.
Solyc02g083670.3	1046.14	1.46	-0.55	4.52109	6.1522345974503e-06	0.000115165417504917	0.12	895	807	943	1451	1050	1140	904.55	797.06	849.16	1374.93	1200.91	1150.22	gene	protein_coding	2	47536485	47542759	-		AHK1_ARATH	Histidine kinase 1	Q:52-1119	H:782-1129	42.051	E:4.49e-73	Eukaryota; Viridiplantae; Streptophyta; Embryophyta; Tracheophyta; Spermatophyta; Magnoliopsida; eudicotyledons; Gunneridae; Pentapetalae; rosids; malvids; Brassicales; Brassicaceae; Camelineae; Arabidopsis	AHK1_ARATH	Histidine kinase 1	Q:18-373	H:782-1129	42.636	E:2.59e-76	Eukaryota; Viridiplantae; Streptophyta; Embryophyta; Tracheophyta; Spermatophyta; Magnoliopsida; eudicotyledons; Gunneridae; Pentapetalae; rosids; malvids; Brassicales; Brassicaceae; Camelineae; Arabidopsis	.	.	GO:0016021^cellular_component^integral component of membrane`GO:0005886^cellular_component^plasma membrane`GO:0009927^molecular_function^histidine phosphotransfer kinase activity`GO:0005034^molecular_function^osmosensor activity`GO:0000155^molecular_function^phosphorelay sensor kinase activity`GO:0009738^biological_process^abscisic acid-activated signaling pathway`GO:0006970^biological_process^re…	GO:0016021^cellular_component^integral component of membrane`GO:0005886^cellular_component^plasma membrane`GO:0009927^molecular_function^histidine phosphotransfer kinase activity`GO:0005034^molecular_function^osmosensor activity`GO:0000155^molecular_function^phosphorelay sensor kinase activity`GO:0009738^biological_process^abscisic acid-activated signaling pathway`GO:0006970^biological_process^re…	.	KEGG:ath:AT2G17820
Solyc07g049180.3	2560.15	0.59	0.76	-4.51991	6.18655416532146e-06	0.000115704084711998	0.17	2755	3262	4048	2079	1904	1548	2784.4	3221.81	3645.17	1970.01	2177.66	1561.87	gene	protein_coding	7	59564864	59575376	-		CERK1_ARATH	Chitin elicitor receptor kinase 1	Q:279-851	H:21-213	44.221	E:9.26e-46	Eukaryota; Viridiplantae; Streptophyta; Embryophyta; Tracheophyta; Spermatophyta; Magnoliopsida; eudicotyledons; Gunneridae; Pentapetalae; rosids; malvids; Brassicales; Brassicaceae; Camelineae; Arabidopsis	CERK1_ARATH	Chitin elicitor receptor kinase 1	Q:11-219	H:3-213	42.857	E:3.55e-48	Eukaryota; Viridiplantae; Streptophyta; Embryophyta; Tracheophyta; Spermatophyta; Magnoliopsida; eudicotyledons; Gunneridae; Pentapetalae; rosids; malvids; Brassicales; Brassicaceae; Camelineae; Arabidopsis	.	.	GO:0016021^cellular_component^integral component of membrane`GO:0005886^cellular_component^plasma membrane`GO:0005524^molecular_function^ATP binding`GO:0008061^molecular_function^chitin binding`GO:2001080^molecular_function^chitosan binding`GO:0042802^molecular_function^identical protein binding`GO:0016301^molecular_function^kinase activity`GO:0042803^molecular_function^protein homodimerization a…	GO:0016021^cellular_component^integral component of membrane`GO:0005886^cellular_component^plasma membrane`GO:0005524^molecular_function^ATP binding`GO:0008061^molecular_function^chitin binding`GO:2001080^molecular_function^chitosan binding`GO:0042802^molecular_function^identical protein binding`GO:0016301^molecular_function^kinase activity`GO:0042803^molecular_function^protein homodimerization a…	.	KEGG:ath:AT3G21630`KO:K13429
Solyc05g052650.2	37.09	3.86	-1.95	4.5178	6.24847059324844e-06	0.000116757455883869	0.43	24	12	11	75	49	49	24.26	11.85	9.91	71.07	56.04	49.44	gene	protein_coding	5	63725610	63726191	+		Y3028_ARATH	Uncharacterized acetyltransferase At3g50280	Q:43-360	H:2-113	31.858	E:1.59e-08	Eukaryota; Viridiplantae; Streptophyta; Embryophyta; Tracheophyta; Spermatophyta; Magnoliopsida; eudicotyledons; Gunneridae; Pentapetalae; rosids; malvids; Brassicales; Brassicaceae; Camelineae; Arabidopsis	Y3028_ARATH	Uncharacterized acetyltransferase At3g50280	Q:15-120	H:2-113	31.858	E:1.43e-08	Eukaryota; Viridiplantae; Streptophyta; Embryophyta; Tracheophyta; Spermatophyta; Magnoliopsida; eudicotyledons; Gunneridae; Pentapetalae; rosids; malvids; Brassicales; Brassicaceae; Camelineae; Arabidopsis	PF02458.16^Transferase^Transferase family^16-116^E:1.3e-29	.	GO:0016747^molecular_function^transferase activity, transferring acyl groups other than amino-acyl groups	GO:0016747^molecular_function^transferase activity, transferring acyl groups other than amino-acyl groups	GO:0016747^molecular_function^transferase activity, transferring acyl groups other than amino-acyl groups	KEGG:ath:AT3G50280
Solyc10g085810.2	1310.28	0.7	0.51	-4.51692	6.2745466371802e-06	0.00011713983668267	0.11	1592	1450	1749	1167	1009	977	1608.99	1432.13	1574.95	1105.82	1154.02	985.76	gene	protein_coding	10	65012933	65017492	+	101261084	VP371_ARATH	Vacuolar protein-sorting-associated protein 37 homolog 1	Q:3-152	H:166-215	62	E:4.74e-12	Eukaryota; Viridiplantae; Streptophyta; Embryophyta; Tracheophyta; Spermatophyta; Magnoliopsida; eudicotyledons; Gunneridae; Pentapetalae; rosids; malvids; Brassicales; Brassicaceae; Camelineae; Arabidopsis	.	.	.	.	.	.	.	.	.	GO:0000813^cellular_component^ESCRT I complex`GO:0043231^cellular_component^intracellular membrane-bounded organelle`GO:0032509^biological_process^endosome transport via multivesicular body sorting pathway`GO:0006612^biological_process^protein targeting to membrane`GO:0006623^biological_process^protein targeting to vacuole`GO:0043162^biological_process^ubiquitin-dependent protein catabolic proces…	.	.	KEGG:ath:AT3G53120`KO:K12185
Solyc04g071480.1	10329.2	0.44	1.18	-4.51664	6.28282378270772e-06	0.000117189542442069	0.26	13680	14211	16812	5678	8148	4237	13826	14035.9	15139	5380.33	9319.09	4274.97	gene	protein_coding	4	58554629	58555795	+	101243886	ROH1_ARATH	Protein ROH1 {ECO:0000303|PubMed:20618910}	Q:4-1140	H:3-402	38.795	E:6.89e-87	Eukaryota; Viridiplantae; Streptophyta; Embryophyta; Tracheophyta; Spermatophyta; Magnoliopsida; eudicotyledons; Gunneridae; Pentapetalae; rosids; malvids; Brassicales; Brassicaceae; Camelineae; Arabidopsis	ROH1_ARATH	Protein ROH1 {ECO:0000303|PubMed:20618910}	Q:2-380	H:3-402	39.036	E:3.63e-92	Eukaryota; Viridiplantae; Streptophyta; Embryophyta; Tracheophyta; Spermatophyta; Magnoliopsida; eudicotyledons; Gunneridae; Pentapetalae; rosids; malvids; Brassicales; Brassicaceae; Camelineae; Arabidopsis	PF05633.12^BPS1^Protein BYPASS1-related^1-382^E:6.5e-171	.	GO:0016021^cellular_component^integral component of membrane`GO:0048354^biological_process^mucilage biosynthetic process involved in seed coat development`GO:0010214^biological_process^seed coat development	GO:0016021^cellular_component^integral component of membrane`GO:0048354^biological_process^mucilage biosynthetic process involved in seed coat development`GO:0010214^biological_process^seed coat development	.	KEGG:ath:AT1G63930
Solyc02g087040.1	180.77	1.73	-0.79	4.51628	6.29343642987558e-06	0.000117282683182467	0.17	125	133	156	266	176	231	126.33	131.36	140.48	252.06	201.3	233.07	gene	protein_coding	2	50217927	50219099	-	101247279	ATL46_ARATH	RING-H2 finger protein ATL46	Q:259-1152	H:59-365	59.688	E:6.73e-101	Eukaryota; Viridiplantae; Streptophyta; Embryophyta; Tracheophyta; Spermatophyta; Magnoliopsida; eudicotyledons; Gunneridae; Pentapetalae; rosids; malvids; Brassicales; Brassicaceae; Camelineae; Arabidopsis	ATL46_ARATH	RING-H2 finger protein ATL46	Q:23-384	H:2-365	57.398	E:7.8e-141	Eukaryota; Viridiplantae; Streptophyta; Embryophyta; Tracheophyta; Spermatophyta; Magnoliopsida; eudicotyledons; Gunneridae; Pentapetalae; rosids; malvids; Brassicales; Brassicaceae; Camelineae; Arabidopsis	PF12678.8^zf-rbx1^RING-H2 zinc finger domain^158-203^E:1.6e-09`PF12861.8^zf-ANAPC11^Anaphase-promoting complex subunit 11 RING-H2 finger^158-206^E:2.3e-05`PF13639.7^zf-RING_2^Ring finger domain^160-203^E:1.4e-12`PF17123.6^zf-RING_11^RING-like zinc finger^160-189^E:7e-10`PF00097.26^zf-C3HC4^Zinc finger, C3HC4 type (RING finger)^161-202^E:9e-07`PF13445.7^zf-RING_UBOX^RING-type zinc-finger^161-200^E…	.	GO:0016021^cellular_component^integral component of membrane`GO:0046872^molecular_function^metal ion binding`GO:0016740^molecular_function^transferase activity`GO:0031625^molecular_function^ubiquitin protein ligase binding`GO:0016567^biological_process^protein ubiquitination	GO:0016021^cellular_component^integral component of membrane`GO:0046872^molecular_function^metal ion binding`GO:0016740^molecular_function^transferase activity`GO:0031625^molecular_function^ubiquitin protein ligase binding`GO:0016567^biological_process^protein ubiquitination	GO:0008270^molecular_function^zinc ion binding`GO:0004842^molecular_function^ubiquitin-protein transferase activity`GO:0005680^cellular_component^anaphase-promoting complex`GO:0046872^molecular_function^metal ion binding	KEGG:ath:AT5G40250
Solyc06g069760.3	5305.81	1.51	-0.59	4.51275	6.39930574435462e-06	0.000119149250219598	0.13	4635	4211	4262	6954	6082	5558	4684.47	4159.11	3837.87	6589.44	6956.15	5607.81	gene	protein_coding	6	43559612	43562357	-	101255410	CDF3_ARATH	Cyclic dof factor 3	Q:142-1263	H:84-446	41.818	E:7.01e-73	Eukaryota; Viridiplantae; Streptophyta; Embryophyta; Tracheophyta; Spermatophyta; Magnoliopsida; eudicotyledons; Gunneridae; Pentapetalae; rosids; malvids; Brassicales; Brassicaceae; Camelineae; Arabidopsis	CDF3_ARATH	Cyclic dof factor 3	Q:35-421	H:68-446	41.191	E:5.64e-79	Eukaryota; Viridiplantae; Streptophyta; Embryophyta; Tracheophyta; Spermatophyta; Magnoliopsida; eudicotyledons; Gunneridae; Pentapetalae; rosids; malvids; Brassicales; Brassicaceae; Camelineae; Arabidopsis	PF02701.16^zf-Dof^Dof domain, zinc finger^72-129^E:5.2e-31	.	GO:0005634^cellular_component^nucleus`GO:0003677^molecular_function^DNA binding`GO:0003700^molecular_function^DNA-binding transcription factor activity`GO:0046872^molecular_function^metal ion binding`GO:0009908^biological_process^flower development`GO:0006355^biological_process^regulation of transcription, DNA-templated	GO:0005634^cellular_component^nucleus`GO:0003677^molecular_function^DNA binding`GO:0003700^molecular_function^DNA-binding transcription factor activity`GO:0046872^molecular_function^metal ion binding`GO:0009908^biological_process^flower development`GO:0006355^biological_process^regulation of transcription, DNA-templated	GO:0003677^molecular_function^DNA binding`GO:0006355^biological_process^regulation of transcription, DNA-templated	KEGG:ath:AT3G47500
Solyc06g076130.3	2307.42	0.34	1.55	-4.51251	6.40658000879673e-06	0.000119178376063819	0.34	2288	3410	5155	1124	1544	685	2312.42	3367.98	4642.01	1065.07	1765.92	691.14	gene	protein_coding	6	47408064	47414091	+	101248884	.	.	.	.	.	.	.	.	.	.	.	.	.	.	.	.	.	.	.	.
Solyc02g091520.3	478.36	1.55	-0.63	4.50684	6.5800760822189e-06	0.000122296837033012	0.14	333	406	429	616	556	522	336.55	401	386.31	583.71	635.91	526.68	gene	protein_coding	2	53427742	53429331	-	101255351	CAR3_ARATH	Protein C2-DOMAIN ABA-RELATED 3 {ECO:0000303|PubMed:25465408}	Q:4-288	H:74-168	62.105	E:3.53e-40	Eukaryota; Viridiplantae; Streptophyta; Embryophyta; Tracheophyta; Spermatophyta; Magnoliopsida; eudicotyledons; Gunneridae; Pentapetalae; rosids; malvids; Brassicales; Brassicaceae; Camelineae; Arabidopsis	.	.	.	.	.	.	.	.	.	GO:0005634^cellular_component^nucleus`GO:0005886^cellular_component^plasma membrane`GO:0005096^molecular_function^GTPase activator activity`GO:0046872^molecular_function^metal ion binding`GO:0005543^molecular_function^phospholipid binding`GO:0009738^biological_process^abscisic acid-activated signaling pathway`GO:0009789^biological_process^positive regulation of abscisic acid-activated signaling p…	.	.	KEGG:ath:AT1G73580
Solyc04g009435.1	6740.5	0.15	2.76	-4.50572	6.61498060145787e-06	0.000122836187823513	0.61	8093	11138	17820	1371	2645	884	8179.38	11000.8	16046.7	1299.13	3025.16	891.92	gene	protein_coding	4	2854903	2862162	+		EF118_ARATH	Ethylene-responsive transcription factor ERF118	Q:1784-1629	H:114-165	55.769	E:7.44e-12	Eukaryota; Viridiplantae; Streptophyta; Embryophyta; Tracheophyta; Spermatophyta; Magnoliopsida; eudicotyledons; Gunneridae; Pentapetalae; rosids; malvids; Brassicales; Brassicaceae; Camelineae; Arabidopsis`EF118_ARATH	EF118_ARATH	Ethylene-responsive transcription factor ERF118	Q:280-388	H:92-192	36.697	E:1.43e-12	Eukaryota; Viridiplantae; Streptophyta; Embryophyta; Tracheophyta; Spermatophyta; Magnoliopsida; eudicotyledons; Gunneridae; Pentapetalae; rosids; malvids; Brassicales; Brassicaceae; Camelineae; Arabidopsis`EF118_ARATH	PF00847.21^AP2^AP2 domain^53-93^E:4.3e-06`PF00847.21^AP2^AP2 domain^220-257^E:2.6e-05`PF00847.21^AP2^AP2 domain^307-349^E:1.2e-06`PF03160.15^Calx-beta^Calx-beta domain^406-434^E:280`PF03160.15^Calx-beta^Calx-beta domain^459-491^E:16`PF03160.15^Calx-beta^Calx-beta domain^514-546^E:190	.	GO:0005634^cellular_component^nucleus`GO:0003677^molecular_function^DNA binding`GO:0003700^molecular_function^DNA-binding transcription factor activity`GO:0009873^biological_process^ethylene-activated signaling pathway	GO:0005634^cellular_component^nucleus`GO:0003677^molecular_function^DNA binding`GO:0003700^molecular_function^DNA-binding transcription factor activity`GO:0009873^biological_process^ethylene-activated signaling pathway	GO:0003700^molecular_function^DNA-binding transcription factor activity`GO:0006355^biological_process^regulation of transcription, DNA-templated`GO:0007154^biological_process^cell communication`GO:0016021^cellular_component^integral component of membrane	KEGG:ath:AT1G68550
Solyc02g093310.3	160.37	0.48	1.05	-4.5049	6.64032685324738e-06	0.000123197246294204	0.23	266	199	205	126	76	105	268.84	196.55	184.6	119.39	86.92	105.94	gene	protein_coding	2	54853273	54856499	-	101263954	L_BUNYW	RNA-directed RNA polymerase L	Q:124-327	H:1221-1287	29.412	E:0.54	Viruses; Riboviria; Negarnaviricota; Polyploviricotina; Ellioviricetes; Bunyavirales; Peribunyaviridae; Orthobunyavirus	.	.	.	.	.	.	.	.	.	GO:0030430^cellular_component^host cell cytoplasm`GO:0019012^cellular_component^virion`GO:0008234^molecular_function^cysteine-type peptidase activity`GO:0046872^molecular_function^metal ion binding`GO:0000166^molecular_function^nucleotide binding`GO:0003968^molecular_function^RNA-directed 5'-3' RNA polymerase activity`GO:0039689^biological_process^negative stranded viral RNA replication`GO:003969…	.	.	KEGG:vg:2648215
Solyc11g005380.2	4491.7	0.52	0.93	-4.50104	6.76229134610731e-06	0.000125321319311723	0.21	4640	6326	7496	3105	3378	2435	4689.52	6248.05	6750.05	2942.22	3863.51	2456.82	gene	protein_coding	11	303996	306518	+	101262765	DF1_ARATH	Trihelix transcription factor DF1 {ECO:0000303|PubMed:22735692}	Q:404-1108	H:257-500	51.587	E:8.03e-68	Eukaryota; Viridiplantae; Streptophyta; Embryophyta; Tracheophyta; Spermatophyta; Magnoliopsida; eudicotyledons; Gunneridae; Pentapetalae; rosids; malvids; Brassicales; Brassicaceae; Camelineae; Arabidopsis`DF1_ARATH	DF1_ARATH	Trihelix transcription factor DF1 {ECO:0000303|PubMed:22735692}	Q:1-369	H:97-500	45.542	E:8.69e-105	Eukaryota; Viridiplantae; Streptophyta; Embryophyta; Tracheophyta; Spermatophyta; Magnoliopsida; eudicotyledons; Gunneridae; Pentapetalae; rosids; malvids; Brassicales; Brassicaceae; Camelineae; Arabidopsis`DF1_ARATH	PF13837.7^Myb_DNA-bind_4^Myb/SANT-like DNA-binding domain^1-48^E:1.3e-07`PF13837.7^Myb_DNA-bind_4^Myb/SANT-like DNA-binding domain^275-363^E:6.2e-23`PF10545.10^MADF_DNA_bdg^Alcohol dehydrogenase transcription factor Myb/SANT-like^299-360^E:0.00017	.	GO:0005634^cellular_component^nucleus`GO:0003677^molecular_function^DNA binding`GO:0003700^molecular_function^DNA-binding transcription factor activity`GO:0019760^biological_process^glucosinolate metabolic process`GO:0010192^biological_process^mucilage biosynthetic process`GO:0006355^biological_process^regulation of transcription, DNA-templated	GO:0005634^cellular_component^nucleus`GO:0003677^molecular_function^DNA binding`GO:0003700^molecular_function^DNA-binding transcription factor activity`GO:0019760^biological_process^glucosinolate metabolic process`GO:0010192^biological_process^mucilage biosynthetic process`GO:0006355^biological_process^regulation of transcription, DNA-templated	.	KEGG:ath:AT1G76880
Solyc05g014120.1	133.77	1.99	-0.99	4.50089	6.76682286624719e-06	0.000125321319311723	0.22	109	83	85	197	166	156	110.16	81.98	76.54	186.67	189.86	157.4	gene	protein_coding	5	7818507	7819250	+	101254202	RLME_GLUOX	Ribosomal RNA large subunit methyltransferase E {ECO:0000255|HAMAP-Rule:MF_01547}	Q:181-495	H:60-162	23.636	E:0.02	Bacteria; Proteobacteria; Alphaproteobacteria; Rhodospirillales; Acetobacteraceae; Gluconobacter	RLME_GLUOX	Ribosomal RNA large subunit methyltransferase E {ECO:0000255|HAMAP-Rule:MF_01547}	Q:61-165	H:60-162	23.636	E:0.007	Bacteria; Proteobacteria; Alphaproteobacteria; Rhodospirillales; Acetobacteraceae; Gluconobacter	PF08241.13^Methyltransf_11^Methyltransferase domain^121-196^E:9.9e-08	COG0293^Specifically methylates the uridine in position 2552 of 23S rRNA at the 2'-O position of the ribose in the fully assembled 50S ribosomal subunit (By similarity)	GO:0005737^cellular_component^cytoplasm`GO:0008650^molecular_function^rRNA (uridine-2'-O-)-methyltransferase activity	GO:0005737^cellular_component^cytoplasm`GO:0008650^molecular_function^rRNA (uridine-2'-O-)-methyltransferase activity	GO:0008168^molecular_function^methyltransferase activity	KEGG:gox:GOX2262`KO:K02427
Solyc10g078580.1	5683.84	1.3	-0.38	4.50068	6.77377009816628e-06	0.000125338767277417	0.09	4973	4947	5426	6979	5241	6638	5026.08	4886.04	4886.04	6613.13	5994.28	6697.49	gene	protein_coding	10	60490599	60490781	+	101246976	AGP14_ARATH	Arabinogalactan protein 14 {ECO:0000303|PubMed:11006345}	Q:1-180	H:1-60	51.667	E:0.098	Eukaryota; Viridiplantae; Streptophyta; Embryophyta; Tracheophyta; Spermatophyta; Magnoliopsida; eudicotyledons; Gunneridae; Pentapetalae; rosids; malvids; Brassicales; Brassicaceae; Camelineae; Arabidopsis	.	.	.	.	.	.	.	.	.	GO:0031225^cellular_component^anchored component of membrane`GO:0005886^cellular_component^plasma membrane`GO:0048767^biological_process^root hair elongation	.	.	KEGG:ath:AT5G56540
Solyc04g064550.1	4048.93	0.47	1.1	-4.49759	6.87296566988433e-06	0.000127061593854584	0.24	4821	5481	6957	2301	3191	1896	4872.46	5413.46	6264.68	2180.37	3649.63	1912.99	gene	protein_coding	4	55737838	55739529	+	100037499	SCL1_ARATH	Scarecrow-like protein 1	Q:232-1689	H:119-593	62.705	E:0	Eukaryota; Viridiplantae; Streptophyta; Embryophyta; Tracheophyta; Spermatophyta; Magnoliopsida; eudicotyledons; Gunneridae; Pentapetalae; rosids; malvids; Brassicales; Brassicaceae; Camelineae; Arabidopsis	SCL1_ARATH	Scarecrow-like protein 1	Q:1-563	H:16-593	57.264	E:0	Eukaryota; Viridiplantae; Streptophyta; Embryophyta; Tracheophyta; Spermatophyta; Magnoliopsida; eudicotyledons; Gunneridae; Pentapetalae; rosids; malvids; Brassicales; Brassicaceae; Camelineae; Arabidopsis	PF03514.15^GRAS^GRAS domain family^195-563^E:3.5e-133	.	GO:0005634^cellular_component^nucleus`GO:0003700^molecular_function^DNA-binding transcription factor activity`GO:0043565^molecular_function^sequence-specific DNA binding`GO:0006355^biological_process^regulation of transcription, DNA-templated	GO:0005634^cellular_component^nucleus`GO:0003700^molecular_function^DNA-binding transcription factor activity`GO:0043565^molecular_function^sequence-specific DNA binding`GO:0006355^biological_process^regulation of transcription, DNA-templated	.	KEGG:ath:AT1G21450
Solyc06g007620.3	1503.59	0.65	0.63	-4.4967	6.90170000166751e-06	0.000127479895960004	0.14	1598	1803	2316	1370	959	1135	1615.06	1780.78	2085.53	1298.18	1096.83	1145.17	gene	protein_coding	6	1623848	1626170	-	101251683	EFG_WOLWR	Elongation factor G {ECO:0000255|HAMAP-Rule:MF_00054}	Q:214-444	H:222-293	35.065	E:6	Bacteria; Proteobacteria; Alphaproteobacteria; Rickettsiales; Anaplasmataceae; Wolbachieae; Wolbachia; unclassified Wolbachia	EFG_WOLWR	Elongation factor G {ECO:0000255|HAMAP-Rule:MF_00054}	Q:25-116	H:222-303	34.783	E:2.3	Bacteria; Proteobacteria; Alphaproteobacteria; Rickettsiales; Anaplasmataceae; Wolbachieae; Wolbachia; unclassified Wolbachia	PF04398.13^DUF538^Protein of unknown function, DUF538^28-137^E:2.5e-33	.	GO:0005737^cellular_component^cytoplasm`GO:0005525^molecular_function^GTP binding`GO:0003924^molecular_function^GTPase activity`GO:0003746^molecular_function^translation elongation factor activity	GO:0005737^cellular_component^cytoplasm`GO:0005525^molecular_function^GTP binding`GO:0003924^molecular_function^GTPase activity`GO:0003746^molecular_function^translation elongation factor activity	.	KEGG:wri:WRi_000140`KO:K02355
Solyc02g077160.3	1009.14	1.74	-0.8	4.49487	6.96121829178991e-06	0.000128465559846365	0.18	825	651	813	1224	983	1548	833.81	642.98	732.1	1159.83	1124.28	1561.87	gene	protein_coding	2	42750301	42757042	-		PLA1_ORYSJ	Phospholipase A1-II 1	Q:1-597	H:201-390	51.485	E:1.89e-63	Eukaryota; Viridiplantae; Streptophyta; Embryophyta; Tracheophyta; Spermatophyta; Magnoliopsida; Liliopsida; Poales; Poaceae; BOP clade; Oryzoideae; Oryzeae; Oryzinae; Oryza; Oryza sativa	PLA1_ORYSJ	Phospholipase A1-II 1	Q:1-199	H:201-390	51.485	E:5e-64	Eukaryota; Viridiplantae; Streptophyta; Embryophyta; Tracheophyta; Spermatophyta; Magnoliopsida; Liliopsida; Poales; Poaceae; BOP clade; Oryzoideae; Oryzeae; Oryzinae; Oryza; Oryza sativa	PF01764.26^Lipase_3^Lipase (class 3)^1-90^E:2e-21	.	GO:0005737^cellular_component^cytoplasm`GO:0008970^molecular_function^phospholipase A1 activity`GO:0016042^biological_process^lipid catabolic process	GO:0005737^cellular_component^cytoplasm`GO:0008970^molecular_function^phospholipase A1 activity`GO:0016042^biological_process^lipid catabolic process	GO:0006629^biological_process^lipid metabolic process	KEGG:osa:107281022
Solyc06g068090.3	8497.84	0.68	0.56	-4.49388	6.99365919678155e-06	0.000128950225048785	0.12	9882	11102	10458	7777	6342	5941	9987.47	10965.2	9417.29	7369.29	7253.52	5994.24	gene	protein_coding	6	42313847	42318953	+	543819	PLDA1_TOBAC	Phospholipase D alpha 1	Q:1-1899	H:32-664	91.627	E:0	Eukaryota; Viridiplantae; Streptophyta; Embryophyta; Tracheophyta; Spermatophyta; Magnoliopsida; eudicotyledons; Gunneridae; Pentapetalae; asterids; lamiids; Solanales; Solanaceae; Nicotianoideae; Nicotianeae; Nicotiana	PLDA1_TOBAC	Phospholipase D alpha 1	Q:1-633	H:32-664	91.627	E:0	Eukaryota; Viridiplantae; Streptophyta; Embryophyta; Tracheophyta; Spermatophyta; Magnoliopsida; eudicotyledons; Gunneridae; Pentapetalae; asterids; lamiids; Solanales; Solanaceae; Nicotianoideae; Nicotianeae; Nicotiana	PF00168.31^C2^C2 domain^13-96^E:1.8e-14`PF00614.23^PLDc^Phospholipase D Active site motif^295-333^E:1.5e-09	.	GO:0005886^cellular_component^plasma membrane`GO:0005509^molecular_function^calcium ion binding`GO:0070290^molecular_function^N-acylphosphatidylethanolamine-specific phospholipase D activity`GO:0004630^molecular_function^phospholipase D activity`GO:0046470^biological_process^phosphatidylcholine metabolic process`GO:0009395^biological_process^phospholipid catabolic process	GO:0005886^cellular_component^plasma membrane`GO:0005509^molecular_function^calcium ion binding`GO:0070290^molecular_function^N-acylphosphatidylethanolamine-specific phospholipase D activity`GO:0004630^molecular_function^phospholipase D activity`GO:0046470^biological_process^phosphatidylcholine metabolic process`GO:0009395^biological_process^phospholipid catabolic process	GO:0003824^molecular_function^catalytic activity	KEGG:nta:107779725`KO:K01115
Solyc04g055090.1	520.15	0.54	0.9	-4.49317	7.01695678535691e-06	0.000129265597549841	0.2	784	621	692	300	379	371	792.37	613.35	623.14	284.27	433.47	374.32	gene	protein_coding	4	53609586	53610836	+	101261612	.	.	.	.	.	.	.	.	.	.	.	.	.	.	.	.	.	.	.	.
Solyc12g010430.1	1018.07	0.53	0.9	-4.49243	7.04142544818762e-06	0.000129601968213908	0.2	1176	1417	1545	692	803	550	1188.55	1399.54	1391.25	655.72	918.41	554.93	gene	protein_coding	12	3464044	3464457	-	101250190	.	.	.	.	.	.	.	VF184_IIV3	Putative helicase 121R	Q:90-133	H:590-635	36.957	E:0.34	Viruses; Varidnaviria; Bamfordvirae; Nucleocytoviricota; Megaviricetes; Pimascovirales; Iridoviridae; Betairidovirinae; Chloriridovirus	.	.	.	GO:0005524^molecular_function^ATP binding`GO:0004386^molecular_function^helicase activity	.	KEGG:vg:4156332
Solyc06g076160.3	41.94	0.23	2.1	-4.49024	7.11443486538673e-06	0.000130830382828504	0.47	51	85	76	21	19	6	51.54	83.95	68.44	19.9	21.73	6.05	gene	protein_coding	6	47430845	47431408	-		C71A9_SOYBN	Cytochrome P450 71A9	Q:1-552	H:314-497	59.783	E:1.36e-74	Eukaryota; Viridiplantae; Streptophyta; Embryophyta; Tracheophyta; Spermatophyta; Magnoliopsida; eudicotyledons; Gunneridae; Pentapetalae; rosids; fabids; Fabales; Fabaceae; Papilionoideae; 50 kb inversion clade; NPAAA clade; indigoferoid/millettioid clade; Phaseoleae; Glycine; Glycine subgen. Soja	C71A9_SOYBN	Cytochrome P450 71A9	Q:1-184	H:314-497	59.783	E:8.2e-75	Eukaryota; Viridiplantae; Streptophyta; Embryophyta; Tracheophyta; Spermatophyta; Magnoliopsida; eudicotyledons; Gunneridae; Pentapetalae; rosids; fabids; Fabales; Fabaceae; Papilionoideae; 50 kb inversion clade; NPAAA clade; indigoferoid/millettioid clade; Phaseoleae; Glycine; Glycine subgen. Soja	PF00067.23^p450^Cytochrome P450^2-173^E:6.4e-53	.	GO:0016021^cellular_component^integral component of membrane`GO:0016020^cellular_component^membrane`GO:0020037^molecular_function^heme binding`GO:0005506^molecular_function^iron ion binding`GO:0016709^molecular_function^oxidoreductase activity, acting on paired donors, with incorporation or reduction of molecular oxygen, NAD(P)H as one donor, and incorporation of one atom of oxygen	GO:0016021^cellular_component^integral component of membrane`GO:0016020^cellular_component^membrane`GO:0020037^molecular_function^heme binding`GO:0005506^molecular_function^iron ion binding`GO:0016709^molecular_function^oxidoreductase activity, acting on paired donors, with incorporation or reduction of molecular oxygen, NAD(P)H as one donor, and incorporation of one atom of oxygen	GO:0005506^molecular_function^iron ion binding`GO:0016705^molecular_function^oxidoreductase activity, acting on paired donors, with incorporation or reduction of molecular oxygen`GO:0020037^molecular_function^heme binding`GO:0055114^biological_process^oxidation-reduction process	KEGG:gmx:100806157`KO:K20617
Solyc09g005560.3	88.33	0.25	1.99	-4.48964	7.13426055028832e-06	0.000131079477293678	0.44	111	195	131	30	53	18	112.18	192.6	117.96	28.43	60.62	18.16	gene	protein_coding	9	386183	388198	-		TGT3B_ARATH	Trihelix transcription factor GT-3b	Q:855-1070	H:31-102	72.222	E:4.13e-29	Eukaryota; Viridiplantae; Streptophyta; Embryophyta; Tracheophyta; Spermatophyta; Magnoliopsida; eudicotyledons; Gunneridae; Pentapetalae; rosids; malvids; Brassicales; Brassicaceae; Camelineae; Arabidopsis	.	.	.	.	.	.	.	.	.	GO:0016592^cellular_component^mediator complex`GO:0005730^cellular_component^nucleolus`GO:0005634^cellular_component^nucleus`GO:0003700^molecular_function^DNA-binding transcription factor activity`GO:0043565^molecular_function^sequence-specific DNA binding`GO:0006355^biological_process^regulation of transcription, DNA-templated	.	.	KEGG:ath:AT2G38250
Solyc06g076300.3	716.11	0.51	0.96	-4.48869	7.16629781450028e-06	0.000131552302536719	0.21	690	1055	1220	458	506	442	697.36	1042	1098.59	433.99	578.73	445.96	gene	protein_coding	6	47544439	47548798	-		SCL14_ARATH	Scarecrow-like protein 14	Q:1101-610	H:470-644	42.697	E:5.4e-51	Eukaryota; Viridiplantae; Streptophyta; Embryophyta; Tracheophyta; Spermatophyta; Magnoliopsida; eudicotyledons; Gunneridae; Pentapetalae; rosids; malvids; Brassicales; Brassicaceae; Camelineae; Arabidopsis`SCL14_ARATH	.	.	.	.	.	.	.	.	.	GO:0005829^cellular_component^cytosol`GO:0005634^cellular_component^nucleus`GO:0003700^molecular_function^DNA-binding transcription factor activity`GO:0043565^molecular_function^sequence-specific DNA binding`GO:0045893^biological_process^positive regulation of transcription, DNA-templated`GO:0006355^biological_process^regulation of transcription, DNA-templated`GO:0010200^biological_process^respon…	.	.	KEGG:ath:AT1G07530
Solyc11g005670.2	10825	0.48	1.06	-4.48446	7.30973053455711e-06	0.000134067395182141	0.24	14320	14640	16655	6498	8661	4913	14472.8	14459.6	14997.6	6157.34	9905.82	4957.03	gene	protein_coding	11	494930	498128	+	101267758	UBIQ1_CAEEL	Polyubiquitin-A	Q:1-1602	H:305-838	95.693	E:0	Eukaryota; Metazoa; Ecdysozoa; Nematoda; Chromadorea; Rhabditida; Rhabditina; Rhabditomorpha; Rhabditoidea; Rhabditidae; Peloderinae; Caenorhabditis`UBIQ1_CAEEL	UBIQ1_CAEEL	Polyubiquitin-A	Q:1-534	H:305-838	95.693	E:0	Eukaryota; Metazoa; Ecdysozoa; Nematoda; Chromadorea; Rhabditida; Rhabditina; Rhabditomorpha; Rhabditoidea; Rhabditidae; Peloderinae; Caenorhabditis`UBIQ1_CAEEL	PF11976.9^Rad60-SLD^Ubiquitin-2 like Rad60 SUMO-like^1-71^E:2e-15`PF00240.24^ubiquitin^Ubiquitin family^3-74^E:5.9e-33`PF14560.7^Ubiquitin_2^Ubiquitin-like domain^12-69^E:0.0032`PF11976.9^Rad60-SLD^Ubiquitin-2 like Rad60 SUMO-like^77-147^E:2e-15`PF00240.24^ubiquitin^Ubiquitin family^79-150^E:5.9e-33`PF14560.7^Ubiquitin_2^Ubiquitin-like domain^87-145^E:0.003`PF11976.9^Rad60-SLD^Ubiquitin-2 like Ra…	.	GO:0005737^cellular_component^cytoplasm`GO:0005634^cellular_component^nucleus`GO:0031386^molecular_function^protein tag`GO:0031625^molecular_function^ubiquitin protein ligase binding`GO:0019941^biological_process^modification-dependent protein catabolic process`GO:0016567^biological_process^protein ubiquitination	GO:0005737^cellular_component^cytoplasm`GO:0005634^cellular_component^nucleus`GO:0031386^molecular_function^protein tag`GO:0031625^molecular_function^ubiquitin protein ligase binding`GO:0019941^biological_process^modification-dependent protein catabolic process`GO:0016567^biological_process^protein ubiquitination	GO:0005515^molecular_function^protein binding	KEGG:cel:CELE_F25B5.4`KO:K08770
Solyc01g107390.3	56.37	0.24	2.08	-4.48325	7.35130433103789e-06	0.000134593354383704	0.46	72	85	129	11	33	17	72.77	83.95	116.16	10.42	37.74	17.15	gene	protein_coding	1	94843134	94845241	-		GH31_ARATH	Probable indole-3-acetic acid-amido synthetase GH3.1	Q:2-1369	H:142-589	78.118	E:0	Eukaryota; Viridiplantae; Streptophyta; Embryophyta; Tracheophyta; Spermatophyta; Magnoliopsida; eudicotyledons; Gunneridae; Pentapetalae; rosids; malvids; Brassicales; Brassicaceae; Camelineae; Arabidopsis	GH31_ARATH	Probable indole-3-acetic acid-amido synthetase GH3.1	Q:1-456	H:142-589	78.118	E:0	Eukaryota; Viridiplantae; Streptophyta; Embryophyta; Tracheophyta; Spermatophyta; Magnoliopsida; eudicotyledons; Gunneridae; Pentapetalae; rosids; malvids; Brassicales; Brassicaceae; Camelineae; Arabidopsis	PF03321.14^GH3^GH3 auxin-responsive promoter^6-426^E:4.8e-159	.	GO:0005737^cellular_component^cytoplasm`GO:0016881^molecular_function^acid-amino acid ligase activity`GO:0009733^biological_process^response to auxin	GO:0005737^cellular_component^cytoplasm`GO:0016881^molecular_function^acid-amino acid ligase activity`GO:0009733^biological_process^response to auxin	.	KEGG:ath:AT2G14960`KO:K14487
Solyc04g054810.3	14758.5	0.74	0.44	-4.48343	7.34527241350895e-06	0.000134593354383704	0.1	18159	17001	17612	12750	10656	13160	18352.8	16791.5	15859.4	12081.6	12187.6	13277.9	gene	protein_coding	4	53225283	53226363	+	101266327	PSC13_MAIZE	Pollen-specific protein C13	Q:3-305	H:61-161	44.554	E:1.05e-16	Eukaryota; Viridiplantae; Streptophyta; Embryophyta; Tracheophyta; Spermatophyta; Magnoliopsida; Liliopsida; Poales; Poaceae; PACMAD clade; Panicoideae; Andropogonodae; Andropogoneae; Tripsacinae; Zea	PSC13_MAIZE	Pollen-specific protein C13	Q:1-101	H:61-161	44.554	E:1.83e-22	Eukaryota; Viridiplantae; Streptophyta; Embryophyta; Tracheophyta; Spermatophyta; Magnoliopsida; Liliopsida; Poales; Poaceae; PACMAD clade; Panicoideae; Andropogonodae; Andropogoneae; Tripsacinae; Zea	PF01190.18^Pollen_Ole_e_1^Pollen protein Ole e 1 like^2-59^E:4.8e-09	.	GO:0005615^cellular_component^extracellular space	GO:0005615^cellular_component^extracellular space	.	KEGG:zma:542292
Solyc05g011970.3	1051.25	0.46	1.12	-4.48019	7.45779435099583e-06	0.000136423386234868	0.25	1058	1628	1819	670	759	485	1069.29	1607.94	1637.99	634.88	868.09	489.35	gene	protein_coding	5	5179991	5182523	+	101260816	C7A22_PANGI	Cytochrome P450 CYP749A22	Q:252-536	H:9-103	41.053	E:2.79e-23	Eukaryota; Viridiplantae; Streptophyta; Embryophyta; Tracheophyta; Spermatophyta; Magnoliopsida; eudicotyledons; Gunneridae; Pentapetalae; asterids; campanulids; Apiales; Araliaceae; Panax	.	.	.	.	.	.	.	.	.	GO:0016021^cellular_component^integral component of membrane`GO:0020037^molecular_function^heme binding`GO:0005506^molecular_function^iron ion binding`GO:0004497^molecular_function^monooxygenase activity`GO:0016705^molecular_function^oxidoreductase activity, acting on paired donors, with incorporation or reduction of molecular oxygen	.	.	.
Solyc11g007580.2	3657.75	0.71	0.5	-4.47947	7.48272007946599e-06	0.000136759486426107	0.11	4036	4663	4618	3409	2740	2715	4079.08	4605.54	4158.45	3230.28	3133.81	2739.33	gene	protein_coding	11	1812925	1822778	-		ROS1A_ORYSJ	Protein ROS1A {ECO:0000303|PubMed:22448681}	Q:3-128	H:1909-1946	69.048	E:3.87e-08	Eukaryota; Viridiplantae; Streptophyta; Embryophyta; Tracheophyta; Spermatophyta; Magnoliopsida; Liliopsida; Poales; Poaceae; BOP clade; Oryzoideae; Oryzeae; Oryzinae; Oryza; Oryza sativa	.	.	.	.	.	.	.	.	.	GO:0005634^cellular_component^nucleus`GO:0051539^molecular_function^4 iron, 4 sulfur cluster binding`GO:0003677^molecular_function^DNA binding`GO:0035514^molecular_function^DNA demethylase activity`GO:0016787^molecular_function^hydrolase activity`GO:0046872^molecular_function^metal ion binding`GO:0006284^biological_process^base-excision repair`GO:0080111^biological_process^DNA demethylation`GO:00…	.	.	KEGG:osa:9271145
Solyc08g076493.1	1449.92	0.66	0.61	-4.47344	7.69710533309748e-06	0.000140554665365189	0.14	1546	1811	2106	1188	1127	1028	1562.5	1788.69	1896.42	1125.72	1288.98	1037.21	gene	protein_coding	8	60615322	60615813	+		CML18_ARATH	Probable calcium-binding protein CML18	Q:13-489	H:9-165	80.503	E:9.23e-81	Eukaryota; Viridiplantae; Streptophyta; Embryophyta; Tracheophyta; Spermatophyta; Magnoliopsida; eudicotyledons; Gunneridae; Pentapetalae; rosids; malvids; Brassicales; Brassicaceae; Camelineae; Arabidopsis	CML17_ARATH	Probable calcium-binding protein CML17	Q:1-163	H:1-166	75.301	E:1.16e-86	Eukaryota; Viridiplantae; Streptophyta; Embryophyta; Tracheophyta; Spermatophyta; Magnoliopsida; eudicotyledons; Gunneridae; Pentapetalae; rosids; malvids; Brassicales; Brassicaceae; Camelineae; Arabidopsis	PF13499.7^EF-hand_7^EF-hand domain pair^16-77^E:5.9e-15`PF13405.7^EF-hand_6^EF-hand domain^16-45^E:3.4e-07`PF13202.7^EF-hand_5^EF hand^17-40^E:0.0048`PF13833.7^EF-hand_8^EF-hand domain pair^39-77^E:4.2e-05`PF13202.7^EF-hand_5^EF hand^54-76^E:0.062`PF13499.7^EF-hand_7^EF-hand domain pair^90-153^E:8.1e-17`PF13833.7^EF-hand_8^EF-hand domain pair^90-112^E:0.016`PF00036.33^EF-hand_1^EF hand^93-120^E:1…	.	GO:0000325^cellular_component^plant-type vacuole`GO:0005509^molecular_function^calcium ion binding`GO:0019722^biological_process^calcium-mediated signaling`GO:0043269^biological_process^regulation of ion transport	GO:0005509^molecular_function^calcium ion binding`GO:0019722^biological_process^calcium-mediated signaling	GO:0005509^molecular_function^calcium ion binding	KEGG:ath:AT1G32250`KO:K13448
Solyc06g069693.1	205.97	0.52	0.95	-4.47174	7.75843384592565e-06	0.000141550726601539	0.21	229	256	367	158	134	117	231.44	252.85	330.48	149.72	153.26	118.05	gene	protein_coding	6	43520660	43522013	-		APRR1_ARATH	Two-component response regulator-like APRR1	Q:3-197	H:252-318	41.791	E:1.46e-05	Eukaryota; Viridiplantae; Streptophyta; Embryophyta; Tracheophyta; Spermatophyta; Magnoliopsida; eudicotyledons; Gunneridae; Pentapetalae; rosids; malvids; Brassicales; Brassicaceae; Camelineae; Arabidopsis	APRR1_ARATH	Two-component response regulator-like APRR1	Q:1-65	H:252-318	41.791	E:1.32e-05	Eukaryota; Viridiplantae; Streptophyta; Embryophyta; Tracheophyta; Spermatophyta; Magnoliopsida; eudicotyledons; Gunneridae; Pentapetalae; rosids; malvids; Brassicales; Brassicaceae; Camelineae; Arabidopsis	.	.	GO:0005634^cellular_component^nucleus`GO:0003677^molecular_function^DNA binding`GO:0003700^molecular_function^DNA-binding transcription factor activity`GO:0007623^biological_process^circadian rhythm`GO:0010031^biological_process^circumnutation`GO:0009908^biological_process^flower development`GO:0010629^biological_process^negative regulation of gene expression`GO:0000160^biological_process^phospho…	GO:0005634^cellular_component^nucleus`GO:0003677^molecular_function^DNA binding`GO:0003700^molecular_function^DNA-binding transcription factor activity`GO:0007623^biological_process^circadian rhythm`GO:0010031^biological_process^circumnutation`GO:0009908^biological_process^flower development`GO:0010629^biological_process^negative regulation of gene expression`GO:0000160^biological_process^phospho…	.	KEGG:ath:AT5G61380`KO:K12127
Solyc02g062370.3	316.51	0.51	0.96	-4.46788	7.89989801316383e-06	0.000144005826489743	0.22	455	444	397	278	190	161	459.86	438.53	357.49	263.43	217.31	162.44	gene	protein_coding	2	34513976	34522355	+		C3H19_ARATH	Zinc finger CCCH domain-containing protein 19	Q:1-1020	H:706-998	43.695	E:1e-66	Eukaryota; Viridiplantae; Streptophyta; Embryophyta; Tracheophyta; Spermatophyta; Magnoliopsida; eudicotyledons; Gunneridae; Pentapetalae; rosids; malvids; Brassicales; Brassicaceae; Camelineae; Arabidopsis	C3H19_ARATH	Zinc finger CCCH domain-containing protein 19	Q:1-340	H:706-998	43.695	E:9.03e-67	Eukaryota; Viridiplantae; Streptophyta; Embryophyta; Tracheophyta; Spermatophyta; Magnoliopsida; eudicotyledons; Gunneridae; Pentapetalae; rosids; malvids; Brassicales; Brassicaceae; Camelineae; Arabidopsis	PF02201.19^SWIB^SWIB/MDM2 domain^150-223^E:2.2e-15`PF03126.19^Plus-3^Plus-3 domain^290-340^E:3.2e-07	.	GO:0005829^cellular_component^cytosol`GO:0005634^cellular_component^nucleus`GO:0003677^molecular_function^DNA binding`GO:0042393^molecular_function^histone binding`GO:0046872^molecular_function^metal ion binding`GO:0032776^biological_process^DNA methylation on cytosine`GO:0031047^biological_process^gene silencing by RNA`GO:0010964^biological_process^regulation of heterochromatin assembly by small…	GO:0005829^cellular_component^cytosol`GO:0005634^cellular_component^nucleus`GO:0003677^molecular_function^DNA binding`GO:0042393^molecular_function^histone binding`GO:0046872^molecular_function^metal ion binding`GO:0032776^biological_process^DNA methylation on cytosine`GO:0031047^biological_process^gene silencing by RNA`GO:0010964^biological_process^regulation of heterochromatin assembly by small…	GO:0005515^molecular_function^protein binding`GO:0003677^molecular_function^DNA binding	KEGG:ath:AT2G16485
Solyc04g015750.3	120267	1.32	-0.41	4.46752	7.91300047942559e-06	0.000144118801052854	0.09	108610	107021	105424	147072	120693	132605	109769	105702	94932.9	139362	138040	133793	gene	protein_coding	4	6034388	6040394	-	101244176	CHLH_ARATH	Magnesium-chelatase subunit ChlH, chloroplastic	Q:1-1803	H:497-1097	87.854	E:0	Eukaryota; Viridiplantae; Streptophyta; Embryophyta; Tracheophyta; Spermatophyta; Magnoliopsida; eudicotyledons; Gunneridae; Pentapetalae; rosids; malvids; Brassicales; Brassicaceae; Camelineae; Arabidopsis	CHLH_ARATH	Magnesium-chelatase subunit ChlH, chloroplastic	Q:1-601	H:497-1097	87.854	E:0	Eukaryota; Viridiplantae; Streptophyta; Embryophyta; Tracheophyta; Spermatophyta; Magnoliopsida; eudicotyledons; Gunneridae; Pentapetalae; rosids; malvids; Brassicales; Brassicaceae; Camelineae; Arabidopsis	PF02514.17^CobN-Mg_chel^CobN/Magnesium Chelatase^1-601^E:2.3e-191	.	GO:0009507^cellular_component^chloroplast`GO:0009706^cellular_component^chloroplast inner membrane`GO:0009570^cellular_component^chloroplast stroma`GO:0010007^cellular_component^magnesium chelatase complex`GO:0005739^cellular_component^mitochondrion`GO:0009536^cellular_component^plastid`GO:0005524^molecular_function^ATP binding`GO:0016851^molecular_function^magnesium chelatase activity`GO:0015995…	GO:0009507^cellular_component^chloroplast`GO:0009706^cellular_component^chloroplast inner membrane`GO:0009570^cellular_component^chloroplast stroma`GO:0010007^cellular_component^magnesium chelatase complex`GO:0005739^cellular_component^mitochondrion`GO:0009536^cellular_component^plastid`GO:0005524^molecular_function^ATP binding`GO:0016851^molecular_function^magnesium chelatase activity`GO:0015995…	GO:0009058^biological_process^biosynthetic process	KEGG:ath:AT5G13630`KO:K03403
Solyc10g086580.2	421643	1.42	-0.51	4.46674	7.94222514673095e-06	0.000144524954893259	0.11	351567	331686	401909	513272	482720	442597	355319	327599	361914	486364	552100	446564	gene	protein_coding	10	65486787	65489640	-		RCA_SOLPN	Ribulose bisphosphate carboxylase/oxygenase activase, chloroplastic	Q:2-472	H:185-341	100	E:1.89e-113	Eukaryota; Viridiplantae; Streptophyta; Embryophyta; Tracheophyta; Spermatophyta; Magnoliopsida; eudicotyledons; Gunneridae; Pentapetalae; asterids; lamiids; Solanales; Solanaceae; Solanoideae; Solaneae; Solanum; Solanum subgen. Lycopersicon	RCA_SOLPN	Ribulose bisphosphate carboxylase/oxygenase activase, chloroplastic	Q:1-157	H:185-341	100	E:1.7e-113	Eukaryota; Viridiplantae; Streptophyta; Embryophyta; Tracheophyta; Spermatophyta; Magnoliopsida; eudicotyledons; Gunneridae; Pentapetalae; asterids; lamiids; Solanales; Solanaceae; Solanoideae; Solaneae; Solanum; Solanum subgen. Lycopersicon	PF00004.30^AAA^ATPase family associated with various cellular activities (AAA)^2-119^E:6.7e-10	.	GO:0009570^cellular_component^chloroplast stroma`GO:0005524^molecular_function^ATP binding	GO:0009570^cellular_component^chloroplast stroma`GO:0005524^molecular_function^ATP binding	GO:0005524^molecular_function^ATP binding	KEGG:spen:107002192
Solyc10g084020.1	75.69	0.2	2.31	-4.46613	7.96483928341275e-06	0.00014481021387055	0.52	209	95	81	21	13	41	211.23	93.83	72.94	19.9	14.87	41.37	gene	protein_coding	10	63812124	63812519	+	101248065	SAU32_ARATH	Auxin-responsive protein SAUR32 {ECO:0000305}	Q:163-354	H:23-86	43.75	E:7.53e-11	Eukaryota; Viridiplantae; Streptophyta; Embryophyta; Tracheophyta; Spermatophyta; Magnoliopsida; eudicotyledons; Gunneridae; Pentapetalae; rosids; malvids; Brassicales; Brassicaceae; Camelineae; Arabidopsis	SAU32_ARATH	Auxin-responsive protein SAUR32 {ECO:0000305}	Q:55-118	H:23-86	43.75	E:4.62e-11	Eukaryota; Viridiplantae; Streptophyta; Embryophyta; Tracheophyta; Spermatophyta; Magnoliopsida; eudicotyledons; Gunneridae; Pentapetalae; rosids; malvids; Brassicales; Brassicaceae; Camelineae; Arabidopsis	PF02519.15^Auxin_inducible^Auxin responsive protein^47-119^E:3.7e-17	.	GO:0005737^cellular_component^cytoplasm`GO:0005634^cellular_component^nucleus`GO:0009734^biological_process^auxin-activated signaling pathway`GO:0007275^biological_process^multicellular organism development`GO:0040008^biological_process^regulation of growth`GO:1900140^biological_process^regulation of seedling development	GO:0005737^cellular_component^cytoplasm`GO:0005634^cellular_component^nucleus`GO:0009734^biological_process^auxin-activated signaling pathway`GO:0007275^biological_process^multicellular organism development`GO:0040008^biological_process^regulation of growth`GO:1900140^biological_process^regulation of seedling development	GO:0009733^biological_process^response to auxin	KEGG:ath:AT2G46690`KO:K14488
Solyc12g098850.2	3312.71	1.91	-0.93	4.46439	8.02989417104485e-06	0.000145865927883419	0.21	2616	2171	2267	4961	4564	3098	2643.92	2144.25	2041.4	4700.92	5219.97	3125.76	gene	protein_coding	12	67213632	67215554	+	101251763	DGAT3_ARATH	Diacylglycerol O-acyltransferase 3 {ECO:0000305}	Q:544-831	H:261-346	47.423	E:3.96e-19	Eukaryota; Viridiplantae; Streptophyta; Embryophyta; Tracheophyta; Spermatophyta; Magnoliopsida; eudicotyledons; Gunneridae; Pentapetalae; rosids; malvids; Brassicales; Brassicaceae; Camelineae; Arabidopsis	DGAT3_ARATH	Diacylglycerol O-acyltransferase 3 {ECO:0000305}	Q:1-277	H:124-346	36.071	E:5.9e-23	Eukaryota; Viridiplantae; Streptophyta; Embryophyta; Tracheophyta; Spermatophyta; Magnoliopsida; eudicotyledons; Gunneridae; Pentapetalae; rosids; malvids; Brassicales; Brassicaceae; Camelineae; Arabidopsis	.	.	GO:0005829^cellular_component^cytosol`GO:0051537^molecular_function^2 iron, 2 sulfur cluster binding`GO:0004144^molecular_function^diacylglycerol O-acyltransferase activity`GO:0046872^molecular_function^metal ion binding`GO:0006071^biological_process^glycerol metabolic process`GO:0019432^biological_process^triglyceride biosynthetic process	GO:0005829^cellular_component^cytosol`GO:0051537^molecular_function^2 iron, 2 sulfur cluster binding`GO:0004144^molecular_function^diacylglycerol O-acyltransferase activity`GO:0046872^molecular_function^metal ion binding`GO:0006071^biological_process^glycerol metabolic process`GO:0019432^biological_process^triglyceride biosynthetic process	.	KEGG:ath:AT1G48300`KO:K22849
Solyc05g014230.3	144.77	1.7	-0.77	4.46195	8.12185349961237e-06	0.000147408109777313	0.17	110	111	112	191	155	187	111.17	109.63	100.85	180.99	177.28	188.68	gene	protein_coding	5	7983707	7985890	-	101255095	AIRP2_ARATH	E3 ubiquitin-protein ligase AIRP2 {ECO:0000305}	Q:5-175	H:175-231	49.123	E:1.02e-12	Eukaryota; Viridiplantae; Streptophyta; Embryophyta; Tracheophyta; Spermatophyta; Magnoliopsida; eudicotyledons; Gunneridae; Pentapetalae; rosids; malvids; Brassicales; Brassicaceae; Camelineae; Arabidopsis	.	.	.	.	.	.	.	.	.	GO:0005829^cellular_component^cytosol`GO:0046872^molecular_function^metal ion binding`GO:0061630^molecular_function^ubiquitin protein ligase activity`GO:0004842^molecular_function^ubiquitin-protein transferase activity`GO:0009789^biological_process^positive regulation of abscisic acid-activated signaling pathway`GO:0016567^biological_process^protein ubiquitination`GO:0009737^biological_process^re…	.	.	KEGG:ath:AT5G01520
Solyc02g093870.3	2481.29	0.51	0.96	-4.46072	8.16840683919629e-06	0.000148124228972811	0.22	2692	3434	4141	1664	1908	1276	2720.73	3391.69	3728.91	1576.77	2182.23	1287.44	gene	protein_coding	2	55199699	55209468	+		LHT1_ARATH	Lysine histidine transporter 1	Q:2-394	H:195-325	80.153	E:1.61e-70	Eukaryota; Viridiplantae; Streptophyta; Embryophyta; Tracheophyta; Spermatophyta; Magnoliopsida; eudicotyledons; Gunneridae; Pentapetalae; rosids; malvids; Brassicales; Brassicaceae; Camelineae; Arabidopsis	LHT1_ARATH	Lysine histidine transporter 1	Q:1-131	H:195-325	80.153	E:1.45e-70	Eukaryota; Viridiplantae; Streptophyta; Embryophyta; Tracheophyta; Spermatophyta; Magnoliopsida; eudicotyledons; Gunneridae; Pentapetalae; rosids; malvids; Brassicales; Brassicaceae; Camelineae; Arabidopsis	PF01490.19^Aa_trans^Transmembrane amino acid transporter protein^3-131^E:6.6e-30	.	GO:0016021^cellular_component^integral component of membrane`GO:0005886^cellular_component^plasma membrane`GO:0009536^cellular_component^plastid`GO:0015171^molecular_function^amino acid transmembrane transporter activity`GO:0015293^molecular_function^symporter activity`GO:0043090^biological_process^amino acid import`GO:0003333^biological_process^amino acid transmembrane transport`GO:0006952^biolo…	GO:0016021^cellular_component^integral component of membrane`GO:0005886^cellular_component^plasma membrane`GO:0009536^cellular_component^plastid`GO:0015171^molecular_function^amino acid transmembrane transporter activity`GO:0015293^molecular_function^symporter activity`GO:0043090^biological_process^amino acid import`GO:0003333^biological_process^amino acid transmembrane transport`GO:0006952^biolo…	.	KEGG:ath:AT5G40780
Solyc02g081440.3	2226.1	0.74	0.43	-4.45773	8.28330880040254e-06	0.000150077449029516	0.1	2446	2723	2790	2141	1628	1776	2472.11	2689.45	2512.36	2028.76	1861.99	1791.92	gene	protein_coding	2	45960177	45967932	+		Y1710_ARATH	Uncharacterized protein At1g65710 {ECO:0000305}	Q:157-519	H:353-441	35.537	E:2.97e-09	Eukaryota; Viridiplantae; Streptophyta; Embryophyta; Tracheophyta; Spermatophyta; Magnoliopsida; eudicotyledons; Gunneridae; Pentapetalae; rosids; malvids; Brassicales; Brassicaceae; Camelineae; Arabidopsis	Y1710_ARATH	Uncharacterized protein At1g65710 {ECO:0000305}	Q:45-187	H:349-454	41.958	E:6.85e-17	Eukaryota; Viridiplantae; Streptophyta; Embryophyta; Tracheophyta; Spermatophyta; Magnoliopsida; eudicotyledons; Gunneridae; Pentapetalae; rosids; malvids; Brassicales; Brassicaceae; Camelineae; Arabidopsis	.	.	.	.	.	KEGG:ath:AT1G65710
Solyc07g063510.3	2334.29	0.74	0.43	-4.45445	8.41068033612421e-06	0.000152253009519154	0.1	2452	2756	3150	2170	1737	1909	2478.17	2722.04	2836.53	2056.24	1986.65	1926.11	gene	protein_coding	7	66106731	66119195	+		T184C_MOUSE	Transmembrane protein 184C	Q:40-174	H:277-321	33.333	E:1.7	Eukaryota; Metazoa; Chordata; Craniata; Vertebrata; Euteleostomi; Mammalia; Eutheria; Euarchontoglires; Glires; Rodentia; Myomorpha; Muroidea; Muridae; Murinae; Mus; Mus	.	.	.	.	.	.	.	.	.	GO:0016021^cellular_component^integral component of membrane	.	.	KEGG:mmu:234463
Solyc06g054270.3	1115.76	2.46	-1.3	4.44994	8.58952797104308e-06	0.000155355829992731	0.29	625	533	860	1606	1980	967	631.67	526.43	774.42	1521.81	2264.58	975.67	gene	protein_coding	6	37195327	37197553	-	101261239	STP6_ARATH	Sugar transport protein 6	Q:4-1023	H:151-491	67.742	E:2.37e-156	Eukaryota; Viridiplantae; Streptophyta; Embryophyta; Tracheophyta; Spermatophyta; Magnoliopsida; eudicotyledons; Gunneridae; Pentapetalae; rosids; malvids; Brassicales; Brassicaceae; Camelineae; Arabidopsis	STP6_ARATH	Sugar transport protein 6	Q:2-341	H:151-491	67.742	E:4.37e-158	Eukaryota; Viridiplantae; Streptophyta; Embryophyta; Tracheophyta; Spermatophyta; Magnoliopsida; eudicotyledons; Gunneridae; Pentapetalae; rosids; malvids; Brassicales; Brassicaceae; Camelineae; Arabidopsis	PF00083.25^Sugar_tr^Sugar (and other) transporter^1-332^E:1.2e-87`PF07690.17^MFS_1^Major Facilitator Superfamily^6-283^E:3.1e-17	.	GO:0005887^cellular_component^integral component of plasma membrane`GO:0005351^molecular_function^carbohydrate:proton symporter activity`GO:0015145^molecular_function^monosaccharide transmembrane transporter activity`GO:0034219^biological_process^carbohydrate transmembrane transport`GO:0046323^biological_process^glucose import	GO:0005887^cellular_component^integral component of plasma membrane`GO:0005351^molecular_function^carbohydrate:proton symporter activity`GO:0015145^molecular_function^monosaccharide transmembrane transporter activity`GO:0034219^biological_process^carbohydrate transmembrane transport`GO:0046323^biological_process^glucose import	GO:0022857^molecular_function^transmembrane transporter activity`GO:0055085^biological_process^transmembrane transport`GO:0016021^cellular_component^integral component of membrane	KEGG:ath:AT3G05960
Solyc04g050140.3	659.15	0.61	0.71	-4.44778	8.67636655564619e-06	0.000156790582467054	0.16	731	781	1049	472	498	479	738.8	771.38	944.61	447.26	569.58	483.29	gene	protein_coding	4	45589735	45592766	+	101249631	VPS62_YEAST	Vacuolar protein sorting-associated protein 62	Q:897-1238	H:180-297	28.244	E:0.26	Eukaryota; Fungi; Dikarya; Ascomycota; Saccharomycotina; Saccharomycetes; Saccharomycetales; Saccharomycetaceae; Saccharomyces	VPS62_YEAST	Vacuolar protein sorting-associated protein 62	Q:299-412	H:180-297	28.244	E:0.27	Eukaryota; Fungi; Dikarya; Ascomycota; Saccharomycotina; Saccharomycetes; Saccharomycetales; Saccharomycetaceae; Saccharomyces	PF06101.12^Vps62^Vacuolar protein sorting-associated protein 62^1-524^E:2.4e-252	.	GO:0005783^cellular_component^endoplasmic reticulum`GO:0000329^cellular_component^fungal-type vacuole membrane`GO:0016021^cellular_component^integral component of membrane`GO:0006623^biological_process^protein targeting to vacuole	GO:0005783^cellular_component^endoplasmic reticulum`GO:0000329^cellular_component^fungal-type vacuole membrane`GO:0016021^cellular_component^integral component of membrane`GO:0006623^biological_process^protein targeting to vacuole	.	KEGG:sce:YGR141W
Solyc01g005160.3	150.23	0.07	3.84	-4.44513	8.78378531793949e-06	0.000158594435256084	0.86	200	92	610	19	28	9	202.13	90.87	549.3	18	32.02	9.08	gene	protein_coding	1	137971	139251	+		PUB21_ARATH	U-box domain-containing protein 21	Q:4-1278	H:28-435	41.822	E:3.54e-96	Eukaryota; Viridiplantae; Streptophyta; Embryophyta; Tracheophyta; Spermatophyta; Magnoliopsida; eudicotyledons; Gunneridae; Pentapetalae; rosids; malvids; Brassicales; Brassicaceae; Camelineae; Arabidopsis	PUB21_ARATH	U-box domain-containing protein 21	Q:2-426	H:28-435	41.822	E:2.63e-97	Eukaryota; Viridiplantae; Streptophyta; Embryophyta; Tracheophyta; Spermatophyta; Magnoliopsida; eudicotyledons; Gunneridae; Pentapetalae; rosids; malvids; Brassicales; Brassicaceae; Camelineae; Arabidopsis	PF04564.16^U-box^U-box domain^5-84^E:1.2e-17	.	GO:0004842^molecular_function^ubiquitin-protein transferase activity`GO:0010200^biological_process^response to chitin	GO:0004842^molecular_function^ubiquitin-protein transferase activity`GO:0010200^biological_process^response to chitin	GO:0004842^molecular_function^ubiquitin-protein transferase activity`GO:0016567^biological_process^protein ubiquitination	KEGG:ath:AT5G37490
Solyc03g097180.3	1337.24	0.68	0.56	-4.43913	9.03253299826764e-06	0.000162944709368921	0.13	1457	1530	1995	1147	1005	998	1472.55	1511.15	1796.47	1086.87	1149.45	1006.94	gene	protein_coding	3	60931238	60938480	-	101255376	MCBC_ECOLX	Microcin B17-processing protein McbC	Q:15-224	H:18-91	32.432	E:2.6	Bacteria; Proteobacteria; Gammaproteobacteria; Enterobacterales; Enterobacteriaceae; Escherichia	.	.	.	.	.	.	.	.	.	GO:0005737^cellular_component^cytoplasm`GO:0016491^molecular_function^oxidoreductase activity`GO:0017000^biological_process^antibiotic biosynthetic process	.	.	.
Solyc06g011470.3	82.2	0.35	1.5	-4.43717	9.11478657200938e-06	0.000164286550372176	0.34	106	94	182	49	46	30	107.13	92.84	163.89	46.43	52.61	30.27	gene	protein_coding	6	7558392	7558759	-		CD166_RAT	CD166 antigen	Q:191-87	H:113-147	34.286	E:7.8	Eukaryota; Metazoa; Chordata; Craniata; Vertebrata; Euteleostomi; Mammalia; Eutheria; Euarchontoglires; Glires; Rodentia; Myomorpha; Muroidea; Muridae; Murinae; Rattus	.	.	.	.	.	.	.	.	.	GO:0030424^cellular_component^axon`GO:0030425^cellular_component^dendrite`GO:0009897^cellular_component^external side of plasma membrane`GO:0001772^cellular_component^immunological synapse`GO:0005887^cellular_component^integral component of plasma membrane`GO:0031226^cellular_component^intrinsic component of plasma membrane`GO:0043025^cellular_component^neuronal cell body`GO:0042101^cellular_comp…	.	.	KEGG:rno:79559`KO:K06547
Solyc06g050140.1	73.55	0.14	2.81	-4.43696	9.12398388736016e-06	0.000164310432870562	0.63	83	135	187	10	36	5	83.89	133.34	168.39	9.48	41.17	5.04	gene	protein_coding	6	32587936	32588208	-		WDR59_SCHPO	Uncharacterized RWD, RING finger and WD repeat-containing protein C11E3.05	Q:209-78	H:515-555	34.091	E:0.99	Eukaryota; Fungi; Dikarya; Ascomycota; Taphrinomycotina; Schizosaccharomycetes; Schizosaccharomycetales; Schizosaccharomycetaceae; Schizosaccharomyces	.	.	.	.	.	.	.	.	.	GO:0000329^cellular_component^fungal-type vacuole membrane`GO:0035859^cellular_component^Seh1-associated complex`GO:0061630^molecular_function^ubiquitin protein ligase activity`GO:0008270^molecular_function^zinc ion binding`GO:0032008^biological_process^positive regulation of TOR signaling`GO:0070647^biological_process^protein modification by small protein conjugation or removal	.	.	KEGG:spo:SPAC11E3.05`KO:K20409
Solyc05g007480.1	764.59	1.62	-0.7	4.43322	9.28369875165146e-06	0.000167042552021094	0.16	650	576	581	1150	803	823	656.94	568.9	523.18	1089.71	918.41	830.38	gene	protein_coding	5	2043934	2045295	-	101264929	PKS1_ARATH	Protein PHYTOCHROME KINASE SUBSTRATE 1	Q:34-1239	H:45-409	33.333	E:1.35e-32	Eukaryota; Viridiplantae; Streptophyta; Embryophyta; Tracheophyta; Spermatophyta; Magnoliopsida; eudicotyledons; Gunneridae; Pentapetalae; rosids; malvids; Brassicales; Brassicaceae; Camelineae; Arabidopsis	PKS1_ARATH	Protein PHYTOCHROME KINASE SUBSTRATE 1	Q:12-413	H:45-409	33.796	E:2.31e-40	Eukaryota; Viridiplantae; Streptophyta; Embryophyta; Tracheophyta; Spermatophyta; Magnoliopsida; eudicotyledons; Gunneridae; Pentapetalae; rosids; malvids; Brassicales; Brassicaceae; Camelineae; Arabidopsis	.	.	GO:0005737^cellular_component^cytoplasm`GO:0005886^cellular_component^plasma membrane`GO:0009638^biological_process^phototropism`GO:0009958^biological_process^positive gravitropism`GO:0010017^biological_process^red or far-red light signaling pathway`GO:0009585^biological_process^red, far-red light phototransduction`GO:0010218^biological_process^response to far red light`GO:0010114^biological_proc…	GO:0005737^cellular_component^cytoplasm`GO:0005886^cellular_component^plasma membrane`GO:0009638^biological_process^phototropism`GO:0009958^biological_process^positive gravitropism`GO:0010017^biological_process^red or far-red light signaling pathway`GO:0009585^biological_process^red, far-red light phototransduction`GO:0010218^biological_process^response to far red light`GO:0010114^biological_proc…	.	KEGG:ath:AT2G02950
Solyc02g078030.2	1576.15	0.55	0.87	-4.4324	9.31880231776341e-06	0.000167529751917621	0.2	1714	1967	2704	1083	1206	933	1732.29	1942.76	2434.92	1026.22	1379.34	941.36	gene	protein_coding	2	43410859	43411359	-		VQ4_ARATH	VQ motif-containing protein 4 {ECO:0000303|PubMed:22535423}	Q:1-480	H:73-238	54.545	E:3.43e-42	Eukaryota; Viridiplantae; Streptophyta; Embryophyta; Tracheophyta; Spermatophyta; Magnoliopsida; eudicotyledons; Gunneridae; Pentapetalae; rosids; malvids; Brassicales; Brassicaceae; Camelineae; Arabidopsis	VQ4_ARATH	VQ motif-containing protein 4 {ECO:0000303|PubMed:22535423}	Q:1-160	H:73-238	56.25	E:6.22e-46	Eukaryota; Viridiplantae; Streptophyta; Embryophyta; Tracheophyta; Spermatophyta; Magnoliopsida; eudicotyledons; Gunneridae; Pentapetalae; rosids; malvids; Brassicales; Brassicaceae; Camelineae; Arabidopsis	.	.	GO:0005634^cellular_component^nucleus`GO:0006952^biological_process^defense response`GO:0051245^biological_process^negative regulation of cellular defense response`GO:0043433^biological_process^negative regulation of DNA-binding transcription factor activity	GO:0005634^cellular_component^nucleus`GO:0006952^biological_process^defense response`GO:0051245^biological_process^negative regulation of cellular defense response`GO:0043433^biological_process^negative regulation of DNA-binding transcription factor activity	.	KEGG:ath:AT1G28280
Solyc01g088560.3	2648.75	0.79	0.34	-4.43177	9.34614637988244e-06	0.000167828222485054	0.08	2888	3105	3225	2518	2028	2277	2918.82	3066.74	2904.07	2385.99	2319.48	2297.41	gene	protein_coding	1	83208469	83213794	-	101245584	RAH1B_ARATH	Ras-related protein RABH1b	Q:335-451	H:1-39	100	E:1.2e-19	Eukaryota; Viridiplantae; Streptophyta; Embryophyta; Tracheophyta; Spermatophyta; Magnoliopsida; eudicotyledons; Gunneridae; Pentapetalae; rosids; malvids; Brassicales; Brassicaceae; Camelineae; Arabidopsis	.	.	.	.	.	.	.	.	.	GO:0005829^cellular_component^cytosol`GO:0012505^cellular_component^endomembrane system`GO:0005768^cellular_component^endosome`GO:0005794^cellular_component^Golgi apparatus`GO:0000139^cellular_component^Golgi membrane`GO:0016020^cellular_component^membrane`GO:0005886^cellular_component^plasma membrane`GO:0009506^cellular_component^plasmodesma`GO:0005802^cellular_component^trans-Golgi network`GO:0…	.	.	KEGG:ath:AT2G44610`KO:K07893
Solyc09g010564.1	152.99	1.92	-0.94	4.43165	9.35148633337092e-06	0.000167828222485054	0.21	119	110	95	242	171	177	120.27	108.64	85.55	229.31	195.58	178.59	gene	protein_coding	9	3933375	3935838	-		PVDR_PLAVS	Duffy receptor	Q:752-910	H:497-543	35.849	E:9	Eukaryota; Sar; Alveolata; Apicomplexa; Aconoidasida; Haemosporida; Plasmodiidae; Plasmodium; Plasmodium (Plasmodium)	CTR86_DEBHA	Copper transport protein 86	Q:173-242	H:117-188	32.432	E:4.9	Eukaryota; Fungi; Dikarya; Ascomycota; Saccharomycotina; Saccharomycetes; Saccharomycetales; Debaryomycetaceae; Debaryomyces	.	.	GO:0016021^cellular_component^integral component of membrane`GO:0046789^molecular_function^host cell surface receptor binding`GO:0042802^molecular_function^identical protein binding`GO:0009405^biological_process^pathogenesis	GO:0005737^cellular_component^cytoplasm`GO:0009088^biological_process^threonine biosynthetic process	.	KEGG:dha:DEHA2F18964g`KO:K19323
Solyc03g095510.3	252.75	1.53	-0.61	4.42845	9.49136020923196e-06	0.000170192156604029	0.14	188	207	227	323	278	291	190.01	204.45	204.41	306.07	317.96	293.61	gene	protein_coding	3	58048434	58055145	-	101252563	KPK2_ARATH	Serine/threonine-protein kinase AtPK2/AtPK19	Q:1-264	H:370-459	62.222	E:3.64e-27	Eukaryota; Viridiplantae; Streptophyta; Embryophyta; Tracheophyta; Spermatophyta; Magnoliopsida; eudicotyledons; Gunneridae; Pentapetalae; rosids; malvids; Brassicales; Brassicaceae; Camelineae; Arabidopsis	.	.	.	.	.	.	.	.	.	GO:0005634^cellular_component^nucleus`GO:0005524^molecular_function^ATP binding`GO:0016301^molecular_function^kinase activity`GO:0004672^molecular_function^protein kinase activity`GO:0004674^molecular_function^protein serine/threonine kinase activity`GO:0071456^biological_process^cellular response to hypoxia`GO:0045727^biological_process^positive regulation of translation`GO:0006468^biological_pr…	.	.	KEGG:ath:AT3G08720`KO:K04688
Solyc01g066430.3	4387	0.38	1.4	-4.42647	9.57859644136663e-06	0.000171608982767557	0.32	5572	6129	8219	1909	3390	1536	5631.47	6053.48	7401.1	1808.92	3877.24	1549.77	gene	protein_coding	1	74130134	74131036	-	101260171	ATL2_ARATH	RING-H2 finger protein ATL2	Q:49-780	H:19-269	51.527	E:1.56e-64	Eukaryota; Viridiplantae; Streptophyta; Embryophyta; Tracheophyta; Spermatophyta; Magnoliopsida; eudicotyledons; Gunneridae; Pentapetalae; rosids; malvids; Brassicales; Brassicaceae; Camelineae; Arabidopsis	ATL2_ARATH	RING-H2 finger protein ATL2	Q:17-283	H:19-300	49.147	E:4.67e-66	Eukaryota; Viridiplantae; Streptophyta; Embryophyta; Tracheophyta; Spermatophyta; Magnoliopsida; eudicotyledons; Gunneridae; Pentapetalae; rosids; malvids; Brassicales; Brassicaceae; Camelineae; Arabidopsis	PF13639.7^zf-RING_2^Ring finger domain^116-159^E:4.1e-13`PF17123.6^zf-RING_11^RING-like zinc finger^116-145^E:9.8e-11`PF13923.7^zf-C3HC4_2^Zinc finger, C3HC4 type (RING finger)^116-158^E:5.7e-08`PF00097.26^zf-C3HC4^Zinc finger, C3HC4 type (RING finger)^117-158^E:7.5e-07`PF13445.7^zf-RING_UBOX^RING-type zinc-finger^117-156^E:1.9e-05`PF12678.8^zf-rbx1^RING-H2 zinc finger domain^129-159^E:2.2e-07`PF…	.	GO:0016021^cellular_component^integral component of membrane`GO:0046872^molecular_function^metal ion binding`GO:0016740^molecular_function^transferase activity`GO:0006952^biological_process^defense response`GO:0016567^biological_process^protein ubiquitination`GO:0010200^biological_process^response to chitin	GO:0016021^cellular_component^integral component of membrane`GO:0046872^molecular_function^metal ion binding`GO:0016740^molecular_function^transferase activity`GO:0006952^biological_process^defense response`GO:0016567^biological_process^protein ubiquitination`GO:0010200^biological_process^response to chitin	GO:0046872^molecular_function^metal ion binding`GO:0008270^molecular_function^zinc ion binding`GO:0004842^molecular_function^ubiquitin-protein transferase activity`GO:0005680^cellular_component^anaphase-promoting complex	KEGG:ath:AT3G16720
Solyc06g062660.3	1626.02	0.69	0.53	-4.42608	9.59615278073336e-06	0.000171776072761121	0.12	1898	2024	2046	1552	1178	1168	1918.26	1999.06	1842.4	1470.64	1347.31	1178.47	gene	protein_coding	6	39656205	39668352	-		SSRP_RICBR	SsrA-binding protein {ECO:0000255|HAMAP-Rule:MF_00023}	Q:134-45	H:33-62	40	E:2.1	Bacteria; Proteobacteria; Alphaproteobacteria; Rickettsiales; Rickettsiaceae; Rickettsieae; Rickettsia; belli group	.	.	.	.	.	.	.	.	COG0691^Binds specifically to the SsrA RNA (tmRNA) and is required for stable association of SsrA with ribosomes (By similarity)	GO:0005737^cellular_component^cytoplasm`GO:0003723^molecular_function^RNA binding`GO:0070929^biological_process^trans-translation	.	.	KEGG:rbe:RBE_0739`KO:K03664
Solyc09g061620.3	1528.74	0.71	0.49	-4.42304	9.73202858346866e-06	0.00017405904078334	0.11	1693	1729	2159	1289	1064	1359	1711.07	1707.7	1944.15	1221.42	1216.93	1371.18	gene	protein_coding	9	60338931	60343494	+	101259877	VA726_ARATH	Putative vesicle-associated membrane protein 726	Q:230-418	H:1-63	88.889	E:1.91e-35	Eukaryota; Viridiplantae; Streptophyta; Embryophyta; Tracheophyta; Spermatophyta; Magnoliopsida; eudicotyledons; Gunneridae; Pentapetalae; rosids; malvids; Brassicales; Brassicaceae; Camelineae; Arabidopsis	.	.	.	.	.	.	.	.	.	GO:0031901^cellular_component^early endosome membrane`GO:0005768^cellular_component^endosome`GO:0016021^cellular_component^integral component of membrane`GO:0005886^cellular_component^plasma membrane`GO:0015031^biological_process^protein transport`GO:0016192^biological_process^vesicle-mediated transport	.	.	KEGG:ath:AT1G04760`KO:K08511
Solyc05g056130.3	1841.55	0.78	0.36	-4.42096	9.82620195819372e-06	0.000175592882937859	0.08	1989	2088	2372	1689	1442	1577	2010.23	2062.27	2135.95	1600.45	1649.26	1591.13	gene	protein_coding	5	66373913	66380469	-		OST1B_ARATH	Dolichyl-diphosphooligosaccharide--protein glycosyltransferase subunit 1B	Q:1-630	H:51-260	69.524	E:5.14e-96	Eukaryota; Viridiplantae; Streptophyta; Embryophyta; Tracheophyta; Spermatophyta; Magnoliopsida; eudicotyledons; Gunneridae; Pentapetalae; rosids; malvids; Brassicales; Brassicaceae; Camelineae; Arabidopsis	OST1B_ARATH	Dolichyl-diphosphooligosaccharide--protein glycosyltransferase subunit 1B	Q:1-210	H:51-260	69.524	E:2.02e-102	Eukaryota; Viridiplantae; Streptophyta; Embryophyta; Tracheophyta; Spermatophyta; Magnoliopsida; eudicotyledons; Gunneridae; Pentapetalae; rosids; malvids; Brassicales; Brassicaceae; Camelineae; Arabidopsis	PF04597.15^Ribophorin_I^Ribophorin I^1-210^E:4.5e-59	.	GO:0005783^cellular_component^endoplasmic reticulum`GO:0016021^cellular_component^integral component of membrane`GO:0005739^cellular_component^mitochondrion`GO:0008250^cellular_component^oligosaccharyltransferase complex`GO:0009505^cellular_component^plant-type cell wall`GO:0005886^cellular_component^plasma membrane`GO:0005774^cellular_component^vacuolar membrane`GO:0006487^biological_process^pro…	GO:0005783^cellular_component^endoplasmic reticulum`GO:0016021^cellular_component^integral component of membrane`GO:0005739^cellular_component^mitochondrion`GO:0008250^cellular_component^oligosaccharyltransferase complex`GO:0009505^cellular_component^plant-type cell wall`GO:0005886^cellular_component^plasma membrane`GO:0005774^cellular_component^vacuolar membrane`GO:0006487^biological_process^pro…	GO:0004579^molecular_function^dolichyl-diphosphooligosaccharide-protein glycotransferase activity`GO:0006486^biological_process^protein glycosylation`GO:0005783^cellular_component^endoplasmic reticulum`GO:0016021^cellular_component^integral component of membrane	KEGG:ath:AT2G01720`KO:K12666
Solyc09g009690.3	1080.27	0.67	0.58	-4.41757	9.98174173650813e-06	0.000178219772048244	0.13	1166	1342	1533	855	855	802	1178.44	1325.46	1380.45	810.18	977.89	809.19	gene	protein_coding	9	3081860	3087603	+	101257500	URH1_ARATH	Uridine nucleosidase 1	Q:2-106	H:302-336	71.429	E:1.56e-08	Eukaryota; Viridiplantae; Streptophyta; Embryophyta; Tracheophyta; Spermatophyta; Magnoliopsida; eudicotyledons; Gunneridae; Pentapetalae; rosids; malvids; Brassicales; Brassicaceae; Camelineae; Arabidopsis	.	.	.	.	.	.	.	.	.	GO:0005829^cellular_component^cytosol`GO:0047622^molecular_function^adenosine nucleosidase activity`GO:0047724^molecular_function^inosine nucleosidase activity`GO:0008477^molecular_function^purine nucleosidase activity`GO:0045437^molecular_function^uridine nucleosidase activity`GO:0072585^molecular_function^xanthosine nucleotidase activity`GO:0006152^biological_process^purine nucleoside catabolic…	.	.	KEGG:ath:AT2G36310`KO:K01240
Solyc01g098760.3	5298.4	0.7	0.51	-4.41589	1.00594437401782e-05	0.000179453598072649	0.11	5802	6353	7240	4631	4225	3877	5863.93	6274.72	6519.52	4388.22	4832.25	3911.75	gene	protein_coding	1	89059098	89080069	+		HIP32_ARATH	Heavy metal-associated isoprenylated plant protein 32 {ECO:0000303|PubMed:21072340, ECO:0000303|PubMed:23368984}	Q:3-122	H:37-76	72.5	E:7.54e-11	Eukaryota; Viridiplantae; Streptophyta; Embryophyta; Tracheophyta; Spermatophyta; Magnoliopsida; eudicotyledons; Gunneridae; Pentapetalae; rosids; malvids; Brassicales; Brassicaceae; Camelineae; Arabidopsis`HIP32_ARATH	HIP33_ARATH	Heavy metal-associated isoprenylated plant protein 33 {ECO:0000303|PubMed:21072340, ECO:0000303|PubMed:23368984}	Q:1-61	H:37-100	61.538	E:4.39e-14	Eukaryota; Viridiplantae; Streptophyta; Embryophyta; Tracheophyta; Spermatophyta; Magnoliopsida; eudicotyledons; Gunneridae; Pentapetalae; rosids; malvids; Brassicales; Brassicaceae; Camelineae; Arabidopsis	.	.	GO:0005618^cellular_component^cell wall`GO:0046872^molecular_function^metal ion binding`GO:0030001^biological_process^metal ion transport	GO:0009506^cellular_component^plasmodesma`GO:0046872^molecular_function^metal ion binding`GO:0030001^biological_process^metal ion transport	.	KEGG:ath:AT5G19090
Solyc10g081340.1	210.82	1.78	-0.83	4.41232	1.02268292948792e-05	0.000182283843759793	0.19	170	154	146	275	270	238	171.81	152.1	131.47	260.58	308.81	240.13	gene	protein_coding	10	62568018	62569499	+	101263562	PKS4_ARATH	Protein PHYTOCHROME KINASE SUBSTRATE 4	Q:13-1350	H:7-377	32.403	E:1.66e-21	Eukaryota; Viridiplantae; Streptophyta; Embryophyta; Tracheophyta; Spermatophyta; Magnoliopsida; eudicotyledons; Gunneridae; Pentapetalae; rosids; malvids; Brassicales; Brassicaceae; Camelineae; Arabidopsis	PKS4_ARATH	Protein PHYTOCHROME KINASE SUBSTRATE 4	Q:5-450	H:7-377	32.759	E:1.07e-29	Eukaryota; Viridiplantae; Streptophyta; Embryophyta; Tracheophyta; Spermatophyta; Magnoliopsida; eudicotyledons; Gunneridae; Pentapetalae; rosids; malvids; Brassicales; Brassicaceae; Camelineae; Arabidopsis	.	.	GO:0009638^biological_process^phototropism`GO:0010017^biological_process^red or far-red light signaling pathway`GO:0009585^biological_process^red, far-red light phototransduction	GO:0009638^biological_process^phototropism`GO:0010017^biological_process^red or far-red light signaling pathway`GO:0009585^biological_process^red, far-red light phototransduction	.	KEGG:ath:AT5G04190
Solyc05g010450.1	439.54	1.82	-0.86	4.41099	1.02898351457741e-05	0.000183250374712113	0.2	374	311	278	692	462	513	377.99	307.17	250.34	655.72	528.4	517.6	gene	protein_coding	5	4698979	4699869	+	101250888	YIH1_YEAST	Protein IMPACT homolog	Q:52-261	H:35-106	30.667	E:1.6	Eukaryota; Fungi; Dikarya; Ascomycota; Saccharomycotina; Saccharomycetes; Saccharomycetales; Saccharomycetaceae; Saccharomyces	YIH1_YEAST	Protein IMPACT homolog	Q:18-87	H:35-106	30.667	E:0.82	Eukaryota; Fungi; Dikarya; Ascomycota; Saccharomycotina; Saccharomycetes; Saccharomycetales; Saccharomycetaceae; Saccharomyces	.	.	GO:0005737^cellular_component^cytoplasm`GO:0005634^cellular_component^nucleus`GO:0005844^cellular_component^polysome`GO:0003785^molecular_function^actin monomer binding`GO:1905538^molecular_function^polysome binding`GO:0004860^molecular_function^protein kinase inhibitor activity`GO:0043022^molecular_function^ribosome binding`GO:0034198^biological_process^cellular response to amino acid starvation…	GO:0005737^cellular_component^cytoplasm`GO:0005634^cellular_component^nucleus`GO:0005844^cellular_component^polysome`GO:0003785^molecular_function^actin monomer binding`GO:1905538^molecular_function^polysome binding`GO:0004860^molecular_function^protein kinase inhibitor activity`GO:0043022^molecular_function^ribosome binding`GO:0034198^biological_process^cellular response to amino acid starvation…	.	KEGG:sce:YCR059C
Solyc04g082530.3	282.92	0.59	0.76	-4.41049	1.03138342928106e-05	0.000183521184449738	0.17	310	336	469	225	188	200	313.31	331.86	422.33	213.2	215.02	201.79	gene	protein_coding	4	66260272	66265557	-	101253085	YQGF_PSYCK	Putative pre-16S rRNA nuclease {ECO:0000255|HAMAP-Rule:MF_00651}	Q:22-243	H:97-167	25.333	E:3.4	Bacteria; Proteobacteria; Gammaproteobacteria; Pseudomonadales; Moraxellaceae; Psychrobacter	PDE10_MOUSE	cAMP and cAMP-inhibited cGMP 3',5'-cyclic phosphodiesterase 10A	Q:36-249	H:131-349	23.504	E:0.51	Eukaryota; Metazoa; Chordata; Craniata; Vertebrata; Euteleostomi; Mammalia; Eutheria; Euarchontoglires; Glires; Rodentia; Myomorpha; Muroidea; Muridae; Murinae; Mus; Mus	.	COG0816^Could be a nuclease that resolves Holliday junction intermediates in genetic recombination (By similarity)	GO:0005737^cellular_component^cytoplasm`GO:0004518^molecular_function^nuclease activity`GO:0000967^biological_process^rRNA 5'-end processing	GO:0005737^cellular_component^cytoplasm`GO:0016020^cellular_component^membrane`GO:0043025^cellular_component^neuronal cell body`GO:0043204^cellular_component^perikaryon`GO:0047555^molecular_function^3',5'-cyclic-GMP phosphodiesterase activity`GO:0004114^molecular_function^3',5'-cyclic-nucleotide phosphodiesterase activity`GO:0030552^molecular_function^cAMP binding`GO:0030553^molecular_function^cG…	.	KEGG:mmu:23984`KO:K18438
Solyc05g052600.3	69610.6	1.22	-0.29	4.40935	1.03679702899342e-05	0.000184327321883736	0.07	63452	63131	68121	79024	67512	77052	64129.2	62353.1	61342	74881.2	77215.3	77742.5	gene	protein_coding	5	63659104	63662442	+		S17P_WHEAT	Sedoheptulose-1,7-bisphosphatase, chloroplastic	Q:1-249	H:301-383	95.181	E:9.33e-46	Eukaryota; Viridiplantae; Streptophyta; Embryophyta; Tracheophyta; Spermatophyta; Magnoliopsida; Liliopsida; Poales; Poaceae; BOP clade; Pooideae; Triticodae; Triticeae; Triticinae; Triticum	.	.	.	.	.	.	.	.	.	GO:0009507^cellular_component^chloroplast`GO:0005737^cellular_component^cytoplasm`GO:0042132^molecular_function^fructose 1,6-bisphosphate 1-phosphatase activity`GO:0046872^molecular_function^metal ion binding`GO:0050278^molecular_function^sedoheptulose-bisphosphatase activity`GO:0030388^biological_process^fructose 1,6-bisphosphate metabolic process`GO:0006002^biological_process^fructose 6-phospha…	.	.	.
Solyc03g078720.3	134.88	1.85	-0.89	4.40535	1.05611861854368e-05	0.000187602619627605	0.2	101	101	91	202	158	152	102.08	99.76	81.94	191.41	180.71	153.36	gene	protein_coding	3	52854252	52855611	+		7DLGT_CATRO	7-deoxyloganetic acid glucosyl transferase {ECO:0000303|PubMed:24104568, ECO:0000303|PubMed:24710322}	Q:271-735	H:10-173	49.398	E:1.58e-41	Eukaryota; Viridiplantae; Streptophyta; Embryophyta; Tracheophyta; Spermatophyta; Magnoliopsida; eudicotyledons; Gunneridae; Pentapetalae; asterids; lamiids; Gentianales; Apocynaceae; Rauvolfioideae; Vinceae; Catharanthinae; Catharanthus	7DLGT_CATRO	7-deoxyloganetic acid glucosyl transferase {ECO:0000303|PubMed:24104568, ECO:0000303|PubMed:24710322}	Q:5-159	H:10-173	49.398	E:1.08e-42	Eukaryota; Viridiplantae; Streptophyta; Embryophyta; Tracheophyta; Spermatophyta; Magnoliopsida; eudicotyledons; Gunneridae; Pentapetalae; asterids; lamiids; Gentianales; Apocynaceae; Rauvolfioideae; Vinceae; Catharanthinae; Catharanthus	.	.	GO:0005829^cellular_component^cytosol`GO:0005634^cellular_component^nucleus`GO:0102970^molecular_function^7-deoxyloganetic acid glucosyltransferase activity`GO:0008194^molecular_function^UDP-glycosyltransferase activity	GO:0005829^cellular_component^cytosol`GO:0005634^cellular_component^nucleus`GO:0102970^molecular_function^7-deoxyloganetic acid glucosyltransferase activity`GO:0008194^molecular_function^UDP-glycosyltransferase activity	.	.
Solyc03g113080.3	260.18	0.52	0.95	-4.40273	1.06895295670111e-05	0.000189559780053234	0.22	321	272	484	197	153	169	324.43	268.65	435.84	186.67	174.99	170.51	gene	protein_coding	3	64856192	64857960	+		AB11A_ARATH	ABC transporter A family member 11	Q:1-300	H:693-788	75	E:1.67e-43	Eukaryota; Viridiplantae; Streptophyta; Embryophyta; Tracheophyta; Spermatophyta; Magnoliopsida; eudicotyledons; Gunneridae; Pentapetalae; rosids; malvids; Brassicales; Brassicaceae; Camelineae; Arabidopsis	AB11A_ARATH	ABC transporter A family member 11	Q:1-100	H:693-788	75	E:1.5e-43	Eukaryota; Viridiplantae; Streptophyta; Embryophyta; Tracheophyta; Spermatophyta; Magnoliopsida; eudicotyledons; Gunneridae; Pentapetalae; rosids; malvids; Brassicales; Brassicaceae; Camelineae; Arabidopsis	.	.	GO:0016021^cellular_component^integral component of membrane`GO:0005524^molecular_function^ATP binding`GO:0016887^molecular_function^ATPase activity`GO:0042626^molecular_function^ATPase-coupled transmembrane transporter activity	GO:0016021^cellular_component^integral component of membrane`GO:0005524^molecular_function^ATP binding`GO:0016887^molecular_function^ATPase activity`GO:0042626^molecular_function^ATPase-coupled transmembrane transporter activity	.	KEGG:ath:AT5G61690
Solyc04g008570.3	2042.66	1.71	-0.77	4.40283	1.06848601195977e-05	0.000189559780053234	0.18	1843	1505	1309	2796	2243	2491	1862.67	1486.46	1178.74	2649.42	2565.38	2513.32	gene	protein_coding	4	2182579	2184456	+		PP379_ARATH	Pentatricopeptide repeat-containing protein At5g13770, chloroplastic	Q:292-1875	H:69-592	53.686	E:0	Eukaryota; Viridiplantae; Streptophyta; Embryophyta; Tracheophyta; Spermatophyta; Magnoliopsida; eudicotyledons; Gunneridae; Pentapetalae; rosids; malvids; Brassicales; Brassicaceae; Camelineae; Arabidopsis`PP379_ARATH	PP379_ARATH	Pentatricopeptide repeat-containing protein At5g13770, chloroplastic	Q:98-625	H:69-592	53.686	E:0	Eukaryota; Viridiplantae; Streptophyta; Embryophyta; Tracheophyta; Spermatophyta; Magnoliopsida; eudicotyledons; Gunneridae; Pentapetalae; rosids; malvids; Brassicales; Brassicaceae; Camelineae; Arabidopsis`PP379_ARATH	PF01535.21^PPR^PPR repeat^244-272^E:0.032`PF01535.21^PPR^PPR repeat^290-312^E:0.018`PF01535.21^PPR^PPR repeat^319-344^E:0.2`PF13812.7^PPR_3^Pentatricopeptide repeat domain^374-431^E:0.0064`PF17177.5^PPR_long^Pentacotripeptide-repeat region of PRORP^396-546^E:1.4e-07`PF12854.8^PPR_1^PPR repeat^416-448^E:1.8e-06`PF01535.21^PPR^PPR repeat^422-452^E:2.4e-06`PF13812.7^PPR_3^Pentatricopeptide repeat do…	.	GO:0009507^cellular_component^chloroplast`GO:0009658^biological_process^chloroplast organization	GO:0009507^cellular_component^chloroplast`GO:0009658^biological_process^chloroplast organization	.	KEGG:ath:AT5G13770
Solyc05g044620.2	473.44	0.66	0.61	-4.39908	1.08708730171634e-05	0.000192448567951004	0.14	527	558	700	364	357	370	532.62	551.12	630.34	344.92	408.31	373.32	gene	protein_coding	5	58077047	58078620	+		.	.	.	.	.	.	.	.	.	.	.	.	.	.	.	.	.	.	.	.
Solyc03g116630.3	693.34	1.91	-0.93	4.39912	1.0868899365498e-05	0.000192448567951004	0.21	568	442	467	968	970	696	574.06	436.55	420.53	917.25	1109.42	702.24	gene	protein_coding	3	67449923	67451194	+	101253674	GLYC_BCNVU	Pre-glycoprotein polyprotein GP complex {ECO:0000255|HAMAP-Rule:MF_04084}	Q:3-116	H:51-87	42.105	E:8.4	Viruses; Riboviria; Negarnaviricota; Polyploviricotina; Ellioviricetes; Bunyavirales; Arenaviridae; Mammarenavirus	.	.	.	.	.	.	.	.	.	GO:0044167^cellular_component^host cell endoplasmic reticulum membrane`GO:0044178^cellular_component^host cell Golgi membrane`GO:0020002^cellular_component^host cell plasma membrane`GO:0016021^cellular_component^integral component of membrane`GO:0019031^cellular_component^viral envelope`GO:0055036^cellular_component^virion membrane`GO:0046872^molecular_function^metal ion binding`GO:0039654^biolog…	.	.	KEGG:vg:5848384
Solyc05g014250.3	391.05	1.62	-0.69	4.39753	1.09489759249197e-05	0.000193666970766885	0.16	306	338	281	479	460	466	309.27	333.84	253.04	453.89	526.11	470.18	gene	protein_coding	5	8012265	8015580	+	101255692	AIRP2_ARATH	E3 ubiquitin-protein ligase AIRP2 {ECO:0000305}	Q:8-193	H:176-237	54.839	E:7.17e-16	Eukaryota; Viridiplantae; Streptophyta; Embryophyta; Tracheophyta; Spermatophyta; Magnoliopsida; eudicotyledons; Gunneridae; Pentapetalae; rosids; malvids; Brassicales; Brassicaceae; Camelineae; Arabidopsis	.	.	.	.	.	.	.	.	.	GO:0005829^cellular_component^cytosol`GO:0046872^molecular_function^metal ion binding`GO:0061630^molecular_function^ubiquitin protein ligase activity`GO:0004842^molecular_function^ubiquitin-protein transferase activity`GO:0009789^biological_process^positive regulation of abscisic acid-activated signaling pathway`GO:0016567^biological_process^protein ubiquitination`GO:0009737^biological_process^re…	.	.	KEGG:ath:AT5G01520
Solyc03g082860.3	189.74	1.82	-0.86	4.39724	1.09637088399478e-05	0.000193763362326325	0.2	156	117	146	271	185	263	157.67	115.56	131.47	256.79	211.59	265.36	gene	protein_coding	3	54173200	54176667	+	101265411	ATXR6_ARATH	Histone-lysine N-methyltransferase ATXR6	Q:5-157	H:299-349	82.353	E:9.64e-22	Eukaryota; Viridiplantae; Streptophyta; Embryophyta; Tracheophyta; Spermatophyta; Magnoliopsida; eudicotyledons; Gunneridae; Pentapetalae; rosids; malvids; Brassicales; Brassicaceae; Camelineae; Arabidopsis	.	.	.	.	.	.	.	.	.	GO:0000123^cellular_component^histone acetyltransferase complex`GO:0000790^cellular_component^nuclear chromatin`GO:0005634^cellular_component^nucleus`GO:0004402^molecular_function^histone acetyltransferase activity`GO:0042393^molecular_function^histone binding`GO:0046976^molecular_function^histone methyltransferase activity (H3-K27 specific)`GO:0046872^molecular_function^metal ion binding`GO:0009…	.	.	KEGG:ath:AT5G24330
Solyc03g112010.3	350.26	1.82	-0.86	4.39696	1.0977589036155e-05	0.000193844533301715	0.2	309	242	217	457	394	467	312.3	239.02	195.41	433.04	450.63	471.19	gene	protein_coding	3	64045520	64056169	-		C71A3_SOLME	Cytochrome P450 71A3	Q:1-816	H:25-290	73.529	E:1.04e-142	Eukaryota; Viridiplantae; Streptophyta; Embryophyta; Tracheophyta; Spermatophyta; Magnoliopsida; eudicotyledons; Gunneridae; Pentapetalae; asterids; lamiids; Solanales; Solanaceae; Solanoideae; Solaneae; Solanum	C71A3_SOLME	Cytochrome P450 71A3	Q:1-272	H:25-290	73.529	E:9.36e-143	Eukaryota; Viridiplantae; Streptophyta; Embryophyta; Tracheophyta; Spermatophyta; Magnoliopsida; eudicotyledons; Gunneridae; Pentapetalae; asterids; lamiids; Solanales; Solanaceae; Solanoideae; Solaneae; Solanum	PF00067.23^p450^Cytochrome P450^2-267^E:7.1e-30	.	GO:0020037^molecular_function^heme binding`GO:0005506^molecular_function^iron ion binding`GO:0004497^molecular_function^monooxygenase activity`GO:0016705^molecular_function^oxidoreductase activity, acting on paired donors, with incorporation or reduction of molecular oxygen	GO:0020037^molecular_function^heme binding`GO:0005506^molecular_function^iron ion binding`GO:0004497^molecular_function^monooxygenase activity`GO:0016705^molecular_function^oxidoreductase activity, acting on paired donors, with incorporation or reduction of molecular oxygen	GO:0005506^molecular_function^iron ion binding`GO:0016705^molecular_function^oxidoreductase activity, acting on paired donors, with incorporation or reduction of molecular oxygen`GO:0020037^molecular_function^heme binding`GO:0055114^biological_process^oxidation-reduction process	.
Solyc01g105280.3	2407.31	0.62	0.69	-4.39601	1.1026034194794e-05	0.000194430901663191	0.16	2565	2839	3914	2055	1714	1601	2592.38	2804.02	3524.5	1947.27	1960.35	1615.35	gene	protein_coding	1	93401882	93406248	+	101254846	P2C10_ARATH	Probable protein phosphatase 2C 10	Q:1-276	H:94-185	79.348	E:1.79e-47	Eukaryota; Viridiplantae; Streptophyta; Embryophyta; Tracheophyta; Spermatophyta; Magnoliopsida; eudicotyledons; Gunneridae; Pentapetalae; rosids; malvids; Brassicales; Brassicaceae; Camelineae; Arabidopsis	.	.	.	.	.	.	.	.	.	GO:0005886^cellular_component^plasma membrane`GO:0004724^molecular_function^magnesium-dependent protein serine/threonine phosphatase activity`GO:0046872^molecular_function^metal ion binding`GO:0004722^molecular_function^protein serine/threonine phosphatase activity	.	.	KEGG:ath:AT1G34750
Solyc02g072260.3	820.28	1.35	-0.43	4.39594	1.10294263879464e-05	0.000194430901663191	0.1	702	719	754	954	824	968	709.49	710.14	678.97	903.99	942.43	976.68	gene	protein_coding	2	42127169	42129664	+		BP73_ORYSJ	SAP-like protein BP-73	Q:219-272	H:342-359	66.667	E:4.5	Eukaryota; Viridiplantae; Streptophyta; Embryophyta; Tracheophyta; Spermatophyta; Magnoliopsida; Liliopsida; Poales; Poaceae; BOP clade; Oryzoideae; Oryzeae; Oryzinae; Oryza; Oryza sativa	BP73_ORYSJ	SAP-like protein BP-73	Q:73-102	H:342-371	70	E:1.81e-06	Eukaryota; Viridiplantae; Streptophyta; Embryophyta; Tracheophyta; Spermatophyta; Magnoliopsida; Liliopsida; Poales; Poaceae; BOP clade; Oryzoideae; Oryzeae; Oryzinae; Oryza; Oryza sativa	PF07498.13^Rho_N^Rho termination factor, N-terminal domain^71-100^E:1.3e-08	.	GO:0003677^molecular_function^DNA binding`GO:0006353^biological_process^DNA-templated transcription, termination`GO:0040008^biological_process^regulation of growth	GO:0003677^molecular_function^DNA binding`GO:0006353^biological_process^DNA-templated transcription, termination`GO:0040008^biological_process^regulation of growth	GO:0006353^biological_process^DNA-templated transcription, termination	KEGG:osa:4331846
Solyc12g057100.2	1668.76	1.43	-0.51	4.3953	1.10618146024716e-05	0.000194837294837795	0.12	1357	1507	1402	2050	1861	1803	1371.48	1488.43	1262.48	1942.53	2128.48	1819.16	gene	protein_coding	12	64135172	64137166	+		PUP3_ARATH	Purine permease 3	Q:73-750	H:5-230	37.611	E:2.45e-43	Eukaryota; Viridiplantae; Streptophyta; Embryophyta; Tracheophyta; Spermatophyta; Magnoliopsida; eudicotyledons; Gunneridae; Pentapetalae; rosids; malvids; Brassicales; Brassicaceae; Camelineae; Arabidopsis	PUP3_ARATH	Purine permease 3	Q:25-250	H:5-230	38.326	E:3.13e-59	Eukaryota; Viridiplantae; Streptophyta; Embryophyta; Tracheophyta; Spermatophyta; Magnoliopsida; eudicotyledons; Gunneridae; Pentapetalae; rosids; malvids; Brassicales; Brassicaceae; Camelineae; Arabidopsis	PF16913.6^PUNUT^Purine nucleobase transmembrane transport^25-250^E:3.5e-61`PF00892.21^EamA^EamA-like transporter family^101-170^E:9.7e-07	.	GO:0016021^cellular_component^integral component of membrane`GO:0016020^cellular_component^membrane`GO:0005345^molecular_function^purine nucleobase transmembrane transporter activity`GO:0015211^molecular_function^purine nucleoside transmembrane transporter activity`GO:0006863^biological_process^purine nucleobase transport	GO:0016021^cellular_component^integral component of membrane`GO:0016020^cellular_component^membrane`GO:0005345^molecular_function^purine nucleobase transmembrane transporter activity`GO:0015211^molecular_function^purine nucleoside transmembrane transporter activity`GO:0006863^biological_process^purine nucleobase transport	GO:0016020^cellular_component^membrane`GO:0016021^cellular_component^integral component of membrane	KEGG:ath:AT1G28220
Solyc02g083835.1	1243.24	2.21	-1.15	4.39486	1.10843967283035e-05	0.000195070428763196	0.26	1076	630	679	1610	1876	1454	1087.48	622.24	611.43	1525.6	2145.63	1467.03	gene	protein_coding	2	47660672	47661223	-		DNJ11_ARATH	Chaperone protein dnaJ 11, chloroplastic	Q:235-549	H:64-161	56.604	E:4.4e-32	Eukaryota; Viridiplantae; Streptophyta; Embryophyta; Tracheophyta; Spermatophyta; Magnoliopsida; eudicotyledons; Gunneridae; Pentapetalae; rosids; malvids; Brassicales; Brassicaceae; Camelineae; Arabidopsis	DNJ11_ARATH	Chaperone protein dnaJ 11, chloroplastic	Q:50-183	H:37-161	48.889	E:9.67e-38	Eukaryota; Viridiplantae; Streptophyta; Embryophyta; Tracheophyta; Spermatophyta; Magnoliopsida; eudicotyledons; Gunneridae; Pentapetalae; rosids; malvids; Brassicales; Brassicaceae; Camelineae; Arabidopsis	PF00226.32^DnaJ^DnaJ domain^81-144^E:2.1e-20	.	GO:0009507^cellular_component^chloroplast`GO:0009570^cellular_component^chloroplast stroma`GO:0005634^cellular_component^nucleus`GO:0009536^cellular_component^plastid	GO:0009507^cellular_component^chloroplast`GO:0009570^cellular_component^chloroplast stroma`GO:0005634^cellular_component^nucleus`GO:0009536^cellular_component^plastid	.	KEGG:ath:AT4G36040
Solyc02g090770.1	259.64	0.05	4.47	-4.38837	1.14205614146745e-05	0.000200817150671512	1.02	388	480	693	3	46	12	392.14	474.09	624.04	2.84	52.61	12.11	gene	protein_coding	2	52918019	52918630	-		EF112_ARATH	Ethylene-responsive transcription factor ERF112	Q:265-435	H:70-126	80.702	E:3.22e-26	Eukaryota; Viridiplantae; Streptophyta; Embryophyta; Tracheophyta; Spermatophyta; Magnoliopsida; eudicotyledons; Gunneridae; Pentapetalae; rosids; malvids; Brassicales; Brassicaceae; Camelineae; Arabidopsis	EF112_ARATH	Ethylene-responsive transcription factor ERF112	Q:72-145	H:57-126	70.27	E:5.44e-28	Eukaryota; Viridiplantae; Streptophyta; Embryophyta; Tracheophyta; Spermatophyta; Magnoliopsida; eudicotyledons; Gunneridae; Pentapetalae; rosids; malvids; Brassicales; Brassicaceae; Camelineae; Arabidopsis	PF00847.21^AP2^AP2 domain^89-135^E:1.3e-10	.	GO:0005634^cellular_component^nucleus`GO:0003677^molecular_function^DNA binding`GO:0003700^molecular_function^DNA-binding transcription factor activity`GO:0009873^biological_process^ethylene-activated signaling pathway	GO:0005634^cellular_component^nucleus`GO:0003677^molecular_function^DNA binding`GO:0003700^molecular_function^DNA-binding transcription factor activity`GO:0009873^biological_process^ethylene-activated signaling pathway	GO:0003700^molecular_function^DNA-binding transcription factor activity`GO:0006355^biological_process^regulation of transcription, DNA-templated	KEGG:ath:AT2G33710
Solyc02g063030.3	2473.48	1.48	-0.57	4.38776	1.1452506668827e-05	0.000201209359589021	0.13	2069	2190	1915	2987	2466	3183	2091.08	2163.02	1724.43	2830.41	2820.43	3211.53	gene	protein_coding	2	35595007	35597192	-		KELL_HUMAN	Kell blood group glycoprotein	Q:627-812	H:466-528	30.159	E:1.2	Eukaryota; Metazoa; Chordata; Craniata; Vertebrata; Euteleostomi; Mammalia; Eutheria; Euarchontoglires; Primates; Haplorrhini; Catarrhini; Hominidae; Homo	.	.	.	.	.	.	.	.	.	GO:0005829^cellular_component^cytosol`GO:0016021^cellular_component^integral component of membrane`GO:0005654^cellular_component^nucleoplasm`GO:0005886^cellular_component^plasma membrane`GO:0046872^molecular_function^metal ion binding`GO:0004222^molecular_function^metalloendopeptidase activity`GO:0006874^biological_process^cellular calcium ion homeostasis`GO:0010961^biological_process^cellular ma…	.	.	KEGG:hsa:3792`KO:K06577
Solyc06g065380.3	1034.08	1.7	-0.77	4.38626	1.15315309846421e-05	0.000202427346266988	0.17	951	712	704	1406	1153	1244	961.15	703.23	633.94	1332.29	1318.72	1255.15	gene	protein_coding	6	40918416	40922431	+		CDPKB_ARATH	Calcium-dependent protein kinase 11	Q:133-636	H:13-180	83.929	E:5.78e-104	Eukaryota; Viridiplantae; Streptophyta; Embryophyta; Tracheophyta; Spermatophyta; Magnoliopsida; eudicotyledons; Gunneridae; Pentapetalae; rosids; malvids; Brassicales; Brassicaceae; Camelineae; Arabidopsis	CDPKB_ARATH	Calcium-dependent protein kinase 11	Q:11-186	H:5-180	81.818	E:3.22e-106	Eukaryota; Viridiplantae; Streptophyta; Embryophyta; Tracheophyta; Spermatophyta; Magnoliopsida; eudicotyledons; Gunneridae; Pentapetalae; rosids; malvids; Brassicales; Brassicaceae; Camelineae; Arabidopsis	PF00069.26^Pkinase^Protein kinase domain^32-184^E:9.2e-46`PF07714.18^PK_Tyr_Ser-Thr^Protein tyrosine and serine/threonine kinase^33-182^E:2.6e-21`PF06293.15^Kdo^Lipopolysaccharide kinase (Kdo/WaaP) family^108-175^E:4.3e-06	.	GO:0005737^cellular_component^cytoplasm`GO:0005829^cellular_component^cytosol`GO:0005634^cellular_component^nucleus`GO:0005886^cellular_component^plasma membrane`GO:0005524^molecular_function^ATP binding`GO:0005509^molecular_function^calcium ion binding`GO:0009931^molecular_function^calcium-dependent protein serine/threonine kinase activity`GO:0005516^molecular_function^calmodulin binding`GO:0004…	GO:0005737^cellular_component^cytoplasm`GO:0005829^cellular_component^cytosol`GO:0005634^cellular_component^nucleus`GO:0005886^cellular_component^plasma membrane`GO:0005524^molecular_function^ATP binding`GO:0005509^molecular_function^calcium ion binding`GO:0009931^molecular_function^calcium-dependent protein serine/threonine kinase activity`GO:0005516^molecular_function^calmodulin binding`GO:0004…	GO:0004672^molecular_function^protein kinase activity`GO:0005524^molecular_function^ATP binding`GO:0006468^biological_process^protein phosphorylation	KEGG:ath:AT1G35670`KO:K13412
Solyc11g020230.1	4583.98	0.13	2.94	-4.38508	1.15941127608625e-05	0.000203354892054389	0.67	6086	8397	10982	612	1747	587	6150.96	8293.53	9889.14	579.92	1998.09	592.26	gene	protein_coding	11	10562948	10565284	-	101250181	ACCR4_ARATH	Serine/threonine-protein kinase-like protein CCR4	Q:88-2322	H:34-750	50.325	E:0	Eukaryota; Viridiplantae; Streptophyta; Embryophyta; Tracheophyta; Spermatophyta; Magnoliopsida; eudicotyledons; Gunneridae; Pentapetalae; rosids; malvids; Brassicales; Brassicaceae; Camelineae; Arabidopsis	ACCR4_ARATH	Serine/threonine-protein kinase-like protein CCR4	Q:27-774	H:31-750	50.389	E:0	Eukaryota; Viridiplantae; Streptophyta; Embryophyta; Tracheophyta; Spermatophyta; Magnoliopsida; eudicotyledons; Gunneridae; Pentapetalae; rosids; malvids; Brassicales; Brassicaceae; Camelineae; Arabidopsis	PF13540.7^RCC1_2^Regulator of chromosome condensation (RCC1) repeat^229-255^E:8.7e-05`PF00069.26^Pkinase^Protein kinase domain^472-754^E:4.2e-49`PF07714.18^PK_Tyr_Ser-Thr^Protein tyrosine and serine/threonine kinase^474-756^E:1.2e-46	.	GO:0016021^cellular_component^integral component of membrane`GO:0005524^molecular_function^ATP binding`GO:0042803^molecular_function^protein homodimerization activity`GO:0004672^molecular_function^protein kinase activity`GO:0004674^molecular_function^protein serine/threonine kinase activity	GO:0016021^cellular_component^integral component of membrane`GO:0005524^molecular_function^ATP binding`GO:0042803^molecular_function^protein homodimerization activity`GO:0004672^molecular_function^protein kinase activity`GO:0004674^molecular_function^protein serine/threonine kinase activity	GO:0004672^molecular_function^protein kinase activity`GO:0005524^molecular_function^ATP binding`GO:0006468^biological_process^protein phosphorylation	KEGG:ath:AT5G47850
Solyc01g108130.3	960.38	0.47	1.1	-4.38436	1.16329045443794e-05	0.000203863966121148	0.25	984	1322	1804	627	692	448	994.5	1305.71	1624.48	594.13	791.46	452.01	gene	protein_coding	1	95386323	95391438	+	101264981	.	.	.	.	.	.	.	.	.	.	.	.	.	.	.	.	.	.	.	.
Solyc08g080010.2	765.2	0.59	0.77	-4.38395	1.16546597129232e-05	0.000204073873765212	0.17	766	1023	1229	608	545	496	774.18	1010.39	1106.7	576.13	623.33	500.45	gene	protein_coding	8	63490438	63498111	+		SBT_PETHY	Subtilisin-like protease {ECO:0000303|PubMed:25971550}	Q:3-2150	H:20-734	84.937	E:0	Eukaryota; Viridiplantae; Streptophyta; Embryophyta; Tracheophyta; Spermatophyta; Magnoliopsida; eudicotyledons; Gunneridae; Pentapetalae; asterids; lamiids; Solanales; Solanaceae; Petunioideae; Petunia	SBT_PETHY	Subtilisin-like protease {ECO:0000303|PubMed:25971550}	Q:1-716	H:20-734	84.937	E:0	Eukaryota; Viridiplantae; Streptophyta; Embryophyta; Tracheophyta; Spermatophyta; Magnoliopsida; eudicotyledons; Gunneridae; Pentapetalae; asterids; lamiids; Solanales; Solanaceae; Petunioideae; Petunia	PF05922.17^Inhibitor_I9^Peptidase inhibitor I9^9-80^E:2.1e-06`PF00082.23^Peptidase_S8^Subtilase family^113-540^E:2.8e-50`PF02225.23^PA^PA domain^337-423^E:2.7e-12`PF17766.2^fn3_6^Fibronectin type-III domain^618-713^E:2.9e-26	.	GO:0048046^cellular_component^apoplast`GO:0005615^cellular_component^extracellular space`GO:0004252^molecular_function^serine-type endopeptidase activity`GO:0036377^biological_process^arbuscular mycorrhizal association`GO:0009610^biological_process^response to symbiotic fungus	GO:0048046^cellular_component^apoplast`GO:0005615^cellular_component^extracellular space`GO:0004252^molecular_function^serine-type endopeptidase activity`GO:0036377^biological_process^arbuscular mycorrhizal association`GO:0009610^biological_process^response to symbiotic fungus	GO:0004252^molecular_function^serine-type endopeptidase activity`GO:0006508^biological_process^proteolysis	.
Solyc04g008690.3	1159.81	1.34	-0.42	4.38103	1.18120946183357e-05	0.000206657199391368	0.1	936	1038	1117	1370	1219	1278	945.99	1025.21	1005.84	1298.18	1394.2	1289.45	gene	protein_coding	4	2333749	2343249	-	101250883	.	.	.	.	.	.	.	SCPL1_CAEEL	CTD small phosphatase-like protein 1 {ECO:0000303|PubMed:18337465}	Q:58-113	H:421-480	31.746	E:0.32	Eukaryota; Metazoa; Ecdysozoa; Nematoda; Chromadorea; Rhabditida; Rhabditina; Rhabditomorpha; Rhabditoidea; Rhabditidae; Peloderinae; Caenorhabditis	.	.	.	GO:0031674^cellular_component^I band`GO:0031430^cellular_component^M band`GO:0019900^molecular_function^kinase binding`GO:0030274^molecular_function^LIM domain binding`GO:0046872^molecular_function^metal ion binding`GO:0016791^molecular_function^phosphatase activity`GO:0004721^molecular_function^phosphoprotein phosphatase activity`GO:0030674^molecular_function^protein-macromolecule adaptor activi…	.	KEGG:cel:CELE_B0379.4`KO:K15731
Solyc01g009565.1	579.99	1.74	-0.8	4.37503	1.21417749899517e-05	0.000212006896239435	0.18	451	461	401	811	520	837	455.81	455.32	361.1	768.48	594.74	844.5	gene	protein_coding	1	3755515	3756183	+		RLP12_ARATH	Receptor-like protein 12 {ECO:0000303|PubMed:18434605}	Q:1-186	H:457-519	46.032	E:6.22e-09	Eukaryota; Viridiplantae; Streptophyta; Embryophyta; Tracheophyta; Spermatophyta; Magnoliopsida; eudicotyledons; Gunneridae; Pentapetalae; rosids; malvids; Brassicales; Brassicaceae; Camelineae; Arabidopsis`RLP12_ARATH	.	.	.	.	.	.	.	.	.	GO:0016021^cellular_component^integral component of membrane`GO:0005886^cellular_component^plasma membrane`GO:0010073^biological_process^meristem maintenance	.	.	KEGG:ath:AT1G71400
Solyc06g076280.2	2756.65	0.55	0.86	-4.37491	1.21483445717882e-05	0.000212006896239435	0.2	3114	3510	4507	1976	2160	1511	3147.24	3466.75	4058.49	1872.41	2470.45	1524.54	gene	protein_coding	6	47541025	47545353	+		SCL14_ARATH	Scarecrow-like protein 14	Q:232-2211	H:86-756	52.017	E:0	Eukaryota; Viridiplantae; Streptophyta; Embryophyta; Tracheophyta; Spermatophyta; Magnoliopsida; eudicotyledons; Gunneridae; Pentapetalae; rosids; malvids; Brassicales; Brassicaceae; Camelineae; Arabidopsis	SCL14_ARATH	Scarecrow-like protein 14	Q:78-737	H:86-756	54.026	E:0	Eukaryota; Viridiplantae; Streptophyta; Embryophyta; Tracheophyta; Spermatophyta; Magnoliopsida; eudicotyledons; Gunneridae; Pentapetalae; rosids; malvids; Brassicales; Brassicaceae; Camelineae; Arabidopsis	PF03514.15^GRAS^GRAS domain family^374-737^E:2.3e-105	.	GO:0005829^cellular_component^cytosol`GO:0005634^cellular_component^nucleus`GO:0003700^molecular_function^DNA-binding transcription factor activity`GO:0043565^molecular_function^sequence-specific DNA binding`GO:0045893^biological_process^positive regulation of transcription, DNA-templated`GO:0006355^biological_process^regulation of transcription, DNA-templated`GO:0010200^biological_process^respon…	GO:0005829^cellular_component^cytosol`GO:0005634^cellular_component^nucleus`GO:0003700^molecular_function^DNA-binding transcription factor activity`GO:0043565^molecular_function^sequence-specific DNA binding`GO:0045893^biological_process^positive regulation of transcription, DNA-templated`GO:0006355^biological_process^regulation of transcription, DNA-templated`GO:0010200^biological_process^respon…	.	KEGG:ath:AT1G07530
Solyc01g094040.3	891.9	0.57	0.82	-4.37522	1.21308472176236e-05	0.000212006896239435	0.19	1027	1150	1374	591	719	553	1037.96	1135.83	1237.27	560.02	822.34	557.96	gene	protein_coding	1	85487166	85489626	-	101244995	STEC_SALTY	Secreted effector kinase SteC	Q:42-197	H:269-327	30.508	E:6.3	Bacteria; Proteobacteria; Gammaproteobacteria; Enterobacterales; Enterobacteriaceae; Salmonella	STEC_SALTY	Secreted effector kinase SteC	Q:14-65	H:269-327	30.508	E:0.91	Bacteria; Proteobacteria; Gammaproteobacteria; Enterobacterales; Enterobacteriaceae; Salmonella	PF02298.18^Cu_bind_like^Plastocyanin-like domain^1-73^E:1.2e-05	.	GO:0005576^cellular_component^extracellular region`GO:0043657^cellular_component^host cell`GO:0030430^cellular_component^host cell cytoplasm`GO:0005524^molecular_function^ATP binding`GO:0016301^molecular_function^kinase activity`GO:0009405^biological_process^pathogenesis`GO:0046777^biological_process^protein autophosphorylation`GO:0030254^biological_process^protein secretion by the type III secre…	GO:0005576^cellular_component^extracellular region`GO:0043657^cellular_component^host cell`GO:0030430^cellular_component^host cell cytoplasm`GO:0005524^molecular_function^ATP binding`GO:0016301^molecular_function^kinase activity`GO:0009405^biological_process^pathogenesis`GO:0046777^biological_process^protein autophosphorylation`GO:0030254^biological_process^protein secretion by the type III secre…	GO:0009055^molecular_function^electron transfer activity	KEGG:stm:STM1698
Solyc10g085680.2	1303.83	1.43	-0.51	4.37412	1.21924872146249e-05	0.000212599493018922	0.12	1128	1063	1151	1546	1249	1688	1140.04	1049.9	1036.46	1464.95	1428.52	1703.13	gene	protein_coding	10	64906616	64910865	-	101259692	STN8_ARATH	Serine/threonine-protein kinase STN8, chloroplastic	Q:1-333	H:381-495	86.957	E:5.61e-50	Eukaryota; Viridiplantae; Streptophyta; Embryophyta; Tracheophyta; Spermatophyta; Magnoliopsida; eudicotyledons; Gunneridae; Pentapetalae; rosids; malvids; Brassicales; Brassicaceae; Camelineae; Arabidopsis	STN8_ARATH	Serine/threonine-protein kinase STN8, chloroplastic	Q:1-111	H:381-495	86.957	E:2.1e-62	Eukaryota; Viridiplantae; Streptophyta; Embryophyta; Tracheophyta; Spermatophyta; Magnoliopsida; eudicotyledons; Gunneridae; Pentapetalae; rosids; malvids; Brassicales; Brassicaceae; Camelineae; Arabidopsis	.	.	GO:0009507^cellular_component^chloroplast`GO:0009534^cellular_component^chloroplast thylakoid`GO:0009579^cellular_component^thylakoid`GO:0005524^molecular_function^ATP binding`GO:0004672^molecular_function^protein kinase activity`GO:0004674^molecular_function^protein serine/threonine kinase activity`GO:0042549^biological_process^photosystem II stabilization	GO:0009507^cellular_component^chloroplast`GO:0009534^cellular_component^chloroplast thylakoid`GO:0009579^cellular_component^thylakoid`GO:0005524^molecular_function^ATP binding`GO:0004672^molecular_function^protein kinase activity`GO:0004674^molecular_function^protein serine/threonine kinase activity`GO:0042549^biological_process^photosystem II stabilization	.	KEGG:ath:AT5G01920
Solyc09g074880.3	1650.13	1.38	-0.47	4.37329	1.22387482908733e-05	0.000213228008620289	0.11	1358	1339	1623	1849	1780	1939	1372.49	1322.5	1461.49	1752.07	2035.84	1956.38	gene	protein_coding	9	67115678	67120592	+	101252117	LPA1_ARATH	Protein LOW PSII ACCUMULATION 1, chloroplastic	Q:1-72	H:430-453	79.167	E:6.31e-05	Eukaryota; Viridiplantae; Streptophyta; Embryophyta; Tracheophyta; Spermatophyta; Magnoliopsida; eudicotyledons; Gunneridae; Pentapetalae; rosids; malvids; Brassicales; Brassicaceae; Camelineae; Arabidopsis	.	.	.	.	.	.	.	.	.	GO:0009507^cellular_component^chloroplast`GO:0009535^cellular_component^chloroplast thylakoid membrane`GO:0005576^cellular_component^extracellular region`GO:0016021^cellular_component^integral component of membrane`GO:0010270^biological_process^photosystem II oxygen evolving complex assembly	.	.	KEGG:ath:AT1G02910
Solyc07g062680.2	1961.65	1.38	-0.46	4.37252	1.22819436594449e-05	0.000213802108473673	0.11	1587	1789	1749	2333	1882	2439	1603.94	1766.96	1574.95	2210.69	2152.5	2460.86	gene	protein_coding	7	65500244	65501822	+		TCP4_ARATH	Transcription factor TCP4	Q:270-1382	H:28-402	50.636	E:4.36e-85	Eukaryota; Viridiplantae; Streptophyta; Embryophyta; Tracheophyta; Spermatophyta; Magnoliopsida; eudicotyledons; Gunneridae; Pentapetalae; rosids; malvids; Brassicales; Brassicaceae; Camelineae; Arabidopsis	TCP4_ARATH	Transcription factor TCP4	Q:90-477	H:28-420	51.942	E:5.67e-100	Eukaryota; Viridiplantae; Streptophyta; Embryophyta; Tracheophyta; Spermatophyta; Magnoliopsida; eudicotyledons; Gunneridae; Pentapetalae; rosids; malvids; Brassicales; Brassicaceae; Camelineae; Arabidopsis	PF03634.14^TCP^TCP family transcription factor^106-255^E:1.1e-30	.	GO:0005634^cellular_component^nucleus`GO:0003677^molecular_function^DNA binding`GO:0001216^molecular_function^DNA-binding transcription activator activity`GO:0003700^molecular_function^DNA-binding transcription factor activity`GO:0043565^molecular_function^sequence-specific DNA binding`GO:1990837^molecular_function^sequence-specific double-stranded DNA binding`GO:0030154^biological_process^cell d…	GO:0005634^cellular_component^nucleus`GO:0003677^molecular_function^DNA binding`GO:0001216^molecular_function^DNA-binding transcription activator activity`GO:0003700^molecular_function^DNA-binding transcription factor activity`GO:0043565^molecular_function^sequence-specific DNA binding`GO:1990837^molecular_function^sequence-specific double-stranded DNA binding`GO:0030154^biological_process^cell d…	.	KEGG:ath:AT3G15030
Solyc11g010370.1	285.96	1.68	-0.75	4.37069	1.23856064965863e-05	0.000215426982330625	0.17	234	200	229	329	359	350	236.5	197.54	206.21	311.75	410.6	353.14	gene	protein_coding	11	3448165	3449214	+	101265698	CAP16_ARATH	Putative clathrin assembly protein At4g40080	Q:1-1005	H:1-349	49.143	E:1.05e-98	Eukaryota; Viridiplantae; Streptophyta; Embryophyta; Tracheophyta; Spermatophyta; Magnoliopsida; eudicotyledons; Gunneridae; Pentapetalae; rosids; malvids; Brassicales; Brassicaceae; Camelineae; Arabidopsis	CAP16_ARATH	Putative clathrin assembly protein At4g40080	Q:1-335	H:1-349	49.143	E:1.97e-106	Eukaryota; Viridiplantae; Streptophyta; Embryophyta; Tracheophyta; Spermatophyta; Magnoliopsida; eudicotyledons; Gunneridae; Pentapetalae; rosids; malvids; Brassicales; Brassicaceae; Camelineae; Arabidopsis	PF07651.17^ANTH^ANTH domain^35-272^E:1.6e-15	.	GO:0005905^cellular_component^clathrin-coated pit`GO:0030136^cellular_component^clathrin-coated vesicle`GO:0005794^cellular_component^Golgi apparatus`GO:0005886^cellular_component^plasma membrane`GO:0005545^molecular_function^1-phosphatidylinositol binding`GO:0032050^molecular_function^clathrin heavy chain binding`GO:0005546^molecular_function^phosphatidylinositol-4,5-bisphosphate binding`GO:0000…	GO:0005905^cellular_component^clathrin-coated pit`GO:0030136^cellular_component^clathrin-coated vesicle`GO:0005794^cellular_component^Golgi apparatus`GO:0005886^cellular_component^plasma membrane`GO:0005545^molecular_function^1-phosphatidylinositol binding`GO:0032050^molecular_function^clathrin heavy chain binding`GO:0005546^molecular_function^phosphatidylinositol-4,5-bisphosphate binding`GO:0000…	GO:0005543^molecular_function^phospholipid binding	KEGG:ath:AT4G40080
Solyc06g075610.1	2841.53	0.39	1.36	-4.36855	1.25071765795449e-05	0.000217360357675488	0.31	3569	3756	5497	1291	2197	1037	3607.09	3709.72	4949.97	1223.32	2512.77	1046.29	gene	protein_coding	6	47138761	47140632	-	101256188	E70H1_ARATH	Exocyst complex component EXO70H1 {ECO:0000303|PubMed:16942608}	Q:73-1785	H:37-610	46.988	E:4.1e-160	Eukaryota; Viridiplantae; Streptophyta; Embryophyta; Tracheophyta; Spermatophyta; Magnoliopsida; eudicotyledons; Gunneridae; Pentapetalae; rosids; malvids; Brassicales; Brassicaceae; Camelineae; Arabidopsis	E70H1_ARATH	Exocyst complex component EXO70H1 {ECO:0000303|PubMed:16942608}	Q:25-596	H:37-611	47.332	E:1.07e-163	Eukaryota; Viridiplantae; Streptophyta; Embryophyta; Tracheophyta; Spermatophyta; Magnoliopsida; eudicotyledons; Gunneridae; Pentapetalae; rosids; malvids; Brassicales; Brassicaceae; Camelineae; Arabidopsis	PF03081.16^Exo70^Exo70 exocyst complex subunit^227-591^E:8.3e-105	.	GO:0005829^cellular_component^cytosol`GO:0012505^cellular_component^endomembrane system`GO:0000145^cellular_component^exocyst`GO:0016020^cellular_component^membrane`GO:0005634^cellular_component^nucleus`GO:0045335^cellular_component^phagocytic vesicle`GO:0031982^cellular_component^vesicle`GO:0006952^biological_process^defense response`GO:0006887^biological_process^exocytosis`GO:1900426^biological…	GO:0005829^cellular_component^cytosol`GO:0012505^cellular_component^endomembrane system`GO:0000145^cellular_component^exocyst`GO:0016020^cellular_component^membrane`GO:0005634^cellular_component^nucleus`GO:0045335^cellular_component^phagocytic vesicle`GO:0031982^cellular_component^vesicle`GO:0006952^biological_process^defense response`GO:0006887^biological_process^exocytosis`GO:1900426^biological…	GO:0006887^biological_process^exocytosis`GO:0000145^cellular_component^exocyst	KEGG:ath:AT3G55150`KO:K07195
Solyc05g010710.2	1183.52	1.65	-0.72	4.36811	1.25324096811008e-05	0.000217617682915088	0.17	998	909	861	1665	1066	1608	1008.65	897.8	775.32	1577.71	1219.21	1622.41	gene	protein_coding	5	4907859	4913134	-		U89A2_ARATH	UDP-glycosyltransferase 89A2	Q:17-1381	H:19-465	48.478	E:2.02e-141	Eukaryota; Viridiplantae; Streptophyta; Embryophyta; Tracheophyta; Spermatophyta; Magnoliopsida; eudicotyledons; Gunneridae; Pentapetalae; rosids; malvids; Brassicales; Brassicaceae; Camelineae; Arabidopsis	U89A2_ARATH	UDP-glycosyltransferase 89A2	Q:6-460	H:19-465	48.478	E:2.25e-152	Eukaryota; Viridiplantae; Streptophyta; Embryophyta; Tracheophyta; Spermatophyta; Magnoliopsida; eudicotyledons; Gunneridae; Pentapetalae; rosids; malvids; Brassicales; Brassicaceae; Camelineae; Arabidopsis	PF00201.19^UDPGT^UDP-glucoronosyl and UDP-glucosyl transferase^328-388^E:8.6e-13	.	GO:0043231^cellular_component^intracellular membrane-bounded organelle`GO:0035251^molecular_function^UDP-glucosyltransferase activity`GO:0008194^molecular_function^UDP-glycosyltransferase activity	GO:0043231^cellular_component^intracellular membrane-bounded organelle`GO:0035251^molecular_function^UDP-glucosyltransferase activity`GO:0008194^molecular_function^UDP-glycosyltransferase activity	GO:0016758^molecular_function^transferase activity, transferring hexosyl groups	KEGG:ath:AT5G03490
Solyc07g043320.3	7078.18	0.68	0.55	-4.3674	1.25734059370435e-05	0.000218148070422254	0.13	8546	8655	8923	6194	5631	4895	8637.21	8548.35	8035.04	5869.28	6440.33	4938.87	gene	protein_coding	7	57138913	57148323	+	101256605	CIP1_ARATH	COP1-interactive protein 1 {ECO:0000303|PubMed:7753789}	Q:1240-1974	H:798-990	27.347	E:1.8	Eukaryota; Viridiplantae; Streptophyta; Embryophyta; Tracheophyta; Spermatophyta; Magnoliopsida; eudicotyledons; Gunneridae; Pentapetalae; rosids; malvids; Brassicales; Brassicaceae; Camelineae; Arabidopsis	SPO15_SCHPO	Sporulation-specific protein 15	Q:975-1066	H:927-1018	29.348	E:0.12	Eukaryota; Fungi; Dikarya; Ascomycota; Taphrinomycotina; Schizosaccharomycetes; Schizosaccharomycetales; Schizosaccharomycetaceae; Schizosaccharomyces	.	.	GO:0005856^cellular_component^cytoskeleton`GO:0005829^cellular_component^cytosol`GO:0005886^cellular_component^plasma membrane`GO:0009536^cellular_component^plastid`GO:0005774^cellular_component^vacuolar membrane`GO:0005773^cellular_component^vacuole`GO:0003779^molecular_function^actin binding`GO:0009738^biological_process^abscisic acid-activated signaling pathway`GO:0071215^biological_process^ce…	GO:0005737^cellular_component^cytoplasm`GO:0035974^cellular_component^meiotic spindle pole body`GO:0044732^cellular_component^mitotic spindle pole body`GO:0031322^biological_process^ascospore-type prospore-specific spindle pole body remodeling`GO:0034613^biological_process^cellular protein localization	.	KEGG:spo:SPAC1F3.06c
Solyc06g051010.1	2302.32	0.64	0.64	-4.36621	1.26418922990297e-05	0.000218972262294895	0.15	2927	2713	3080	1716	1887	1604	2958.24	2679.57	2773.5	1626.04	2158.21	1618.38	gene	protein_coding	6	34187124	34188896	-	101262219	PNAA_PRUDU	Peptide-N4-(N-acetyl-beta-glucosaminyl)asparagine amidase A	Q:121-1746	H:10-546	37.818	E:1.34e-117	Eukaryota; Viridiplantae; Streptophyta; Embryophyta; Tracheophyta; Spermatophyta; Magnoliopsida; eudicotyledons; Gunneridae; Pentapetalae; rosids; fabids; Rosales; Rosaceae; Amygdaloideae; Amygdaleae; Prunus	PNAA_PRUDU	Peptide-N4-(N-acetyl-beta-glucosaminyl)asparagine amidase A	Q:41-582	H:10-546	37.319	E:2.73e-121	Eukaryota; Viridiplantae; Streptophyta; Embryophyta; Tracheophyta; Spermatophyta; Magnoliopsida; eudicotyledons; Gunneridae; Pentapetalae; rosids; fabids; Rosales; Rosaceae; Amygdaloideae; Amygdaleae; Prunus	PF12222.9^PNGaseA^Peptide N-acetyl-beta-D-glucosaminyl asparaginase amidase A^58-481^E:1.6e-104	.	GO:0000224^molecular_function^peptide-N4-(N-acetyl-beta-glucosaminyl)asparagine amidase activity	GO:0000224^molecular_function^peptide-N4-(N-acetyl-beta-glucosaminyl)asparagine amidase activity	.	.
Solyc09g018230.1	514.26	0.58	0.8	-4.36631	1.26360898244185e-05	0.000218972262294895	0.18	591	604	849	436	357	303	597.31	596.56	764.51	413.14	408.31	305.72	gene	protein_coding	9	13635244	13637310	-	101255124	PUB16_ARATH	U-box domain-containing protein 16	Q:1-2061	H:1-672	55.46	E:0	Eukaryota; Viridiplantae; Streptophyta; Embryophyta; Tracheophyta; Spermatophyta; Magnoliopsida; eudicotyledons; Gunneridae; Pentapetalae; rosids; malvids; Brassicales; Brassicaceae; Camelineae; Arabidopsis	PUB16_ARATH	U-box domain-containing protein 16	Q:1-687	H:1-672	55.603	E:0	Eukaryota; Viridiplantae; Streptophyta; Embryophyta; Tracheophyta; Spermatophyta; Magnoliopsida; eudicotyledons; Gunneridae; Pentapetalae; rosids; malvids; Brassicales; Brassicaceae; Camelineae; Arabidopsis	PF04564.16^U-box^U-box domain^282-353^E:9e-20`PF00514.24^Arm^Armadillo/beta-catenin-like repeat^413-451^E:0.00027	.	GO:0005737^cellular_component^cytoplasm`GO:0005634^cellular_component^nucleus`GO:0004842^molecular_function^ubiquitin-protein transferase activity`GO:0010200^biological_process^response to chitin	GO:0005737^cellular_component^cytoplasm`GO:0005634^cellular_component^nucleus`GO:0004842^molecular_function^ubiquitin-protein transferase activity`GO:0010200^biological_process^response to chitin	GO:0004842^molecular_function^ubiquitin-protein transferase activity`GO:0016567^biological_process^protein ubiquitination`GO:0005515^molecular_function^protein binding	KEGG:ath:AT5G01830
Solyc03g116280.3	246.98	2.55	-1.35	4.3659	1.2659961082182e-05	0.000219103406059124	0.31	188	143	96	365	239	441	190.01	141.24	86.45	345.86	273.35	444.95	gene	protein_coding	3	67251841	67252905	+		DLO1_ARATH	Protein DMR6-LIKE OXYGENASE 1 {ECO:0000303|PubMed:25376907}	Q:575-652	H:219-244	57.692	E:0.007	Eukaryota; Viridiplantae; Streptophyta; Embryophyta; Tracheophyta; Spermatophyta; Magnoliopsida; eudicotyledons; Gunneridae; Pentapetalae; rosids; malvids; Brassicales; Brassicaceae; Camelineae; Arabidopsis`DLO1_ARATH	.	.	.	.	.	.	.	.	.	GO:0051213^molecular_function^dioxygenase activity`GO:0046872^molecular_function^metal ion binding`GO:0002229^biological_process^defense response to oomycetes`GO:0010150^biological_process^leaf senescence`GO:0009617^biological_process^response to bacterium`GO:0009620^biological_process^response to fungus`GO:0002239^biological_process^response to oomycetes`GO:0009751^biological_process^response to…	.	.	KEGG:ath:AT4G10500`KO:K24028
Solyc05g052980.3	9335.78	0.49	1.04	-4.36485	1.27207621384556e-05	0.0002199732786693	0.24	11850	13233	14008	5131	7662	4687	11976.5	13070	12614	4862.01	8763.24	4729	gene	protein_coding	5	64000972	64002806	-	101248778	P2C09_ORYSJ	Probable protein phosphatase 2C 9	Q:3-332	H:289-414	57.937	E:2.76e-27	Eukaryota; Viridiplantae; Streptophyta; Embryophyta; Tracheophyta; Spermatophyta; Magnoliopsida; Liliopsida; Poales; Poaceae; BOP clade; Oryzoideae; Oryzeae; Oryzinae; Oryza; Oryza sativa	P2C09_ORYSJ	Probable protein phosphatase 2C 9	Q:1-110	H:289-414	61.905	E:1.63e-43	Eukaryota; Viridiplantae; Streptophyta; Embryophyta; Tracheophyta; Spermatophyta; Magnoliopsida; Liliopsida; Poales; Poaceae; BOP clade; Oryzoideae; Oryzeae; Oryzinae; Oryza; Oryza sativa	PF00481.22^PP2C^Protein phosphatase 2C^2-98^E:8.2e-16	.	GO:0005829^cellular_component^cytosol`GO:0016021^cellular_component^integral component of membrane`GO:0005634^cellular_component^nucleus`GO:0004724^molecular_function^magnesium-dependent protein serine/threonine phosphatase activity`GO:0046872^molecular_function^metal ion binding`GO:0004722^molecular_function^protein serine/threonine phosphatase activity	GO:0005829^cellular_component^cytosol`GO:0016021^cellular_component^integral component of membrane`GO:0005634^cellular_component^nucleus`GO:0004724^molecular_function^magnesium-dependent protein serine/threonine phosphatase activity`GO:0046872^molecular_function^metal ion binding`GO:0004722^molecular_function^protein serine/threonine phosphatase activity	GO:0003824^molecular_function^catalytic activity	KEGG:osa:4327465`KO:K14497
Solyc07g048070.3	400.57	0.38	1.4	-4.36425	1.27557693381968e-05	0.000220396041081825	0.32	417	547	866	211	276	145	421.45	540.26	779.82	199.94	315.67	146.3	gene	protein_coding	7	59380165	59382318	+		B561J_ARATH	Cytochrome b561 and DOMON domain-containing protein At5g47530	Q:80-625	H:25-209	42.703	E:9.15e-45	Eukaryota; Viridiplantae; Streptophyta; Embryophyta; Tracheophyta; Spermatophyta; Magnoliopsida; eudicotyledons; Gunneridae; Pentapetalae; rosids; malvids; Brassicales; Brassicaceae; Camelineae; Arabidopsis	B561J_ARATH	Cytochrome b561 and DOMON domain-containing protein At5g47530	Q:27-208	H:25-209	42.703	E:4.04e-45	Eukaryota; Viridiplantae; Streptophyta; Embryophyta; Tracheophyta; Spermatophyta; Magnoliopsida; eudicotyledons; Gunneridae; Pentapetalae; rosids; malvids; Brassicales; Brassicaceae; Camelineae; Arabidopsis	PF04526.14^DUF568^Protein of unknown function (DUF568)^90-188^E:6.7e-25	.	GO:0016021^cellular_component^integral component of membrane`GO:0046872^molecular_function^metal ion binding`GO:0055114^biological_process^oxidation-reduction process	GO:0016021^cellular_component^integral component of membrane`GO:0046872^molecular_function^metal ion binding`GO:0055114^biological_process^oxidation-reduction process	.	KEGG:ath:AT5G47530
Solyc02g082670.3	974.2	0.7	0.51	-4.36355	1.27970594770919e-05	0.000220926571882433	0.12	1068	1120	1386	867	740	737	1079.4	1106.2	1248.07	821.55	846.36	743.6	gene	protein_coding	2	46870653	46873288	-	101258516	WOX8_ORYSJ	WUSCHEL-related homeobox 8	Q:6-524	H:70-240	58.192	E:1e-51	Eukaryota; Viridiplantae; Streptophyta; Embryophyta; Tracheophyta; Spermatophyta; Magnoliopsida; Liliopsida; Poales; Poaceae; BOP clade; Oryzoideae; Oryzeae; Oryzinae; Oryza; Oryza sativa	WOX8_ORYSJ	WUSCHEL-related homeobox 8	Q:2-174	H:70-240	60.452	E:5.41e-56	Eukaryota; Viridiplantae; Streptophyta; Embryophyta; Tracheophyta; Spermatophyta; Magnoliopsida; Liliopsida; Poales; Poaceae; BOP clade; Oryzoideae; Oryzeae; Oryzinae; Oryza; Oryza sativa	PF00046.30^Homeodomain^Homeodomain^22-82^E:6.4e-19	.	GO:0005634^cellular_component^nucleus`GO:0003677^molecular_function^DNA binding`GO:0007275^biological_process^multicellular organism development	GO:0005634^cellular_component^nucleus`GO:0003677^molecular_function^DNA binding`GO:0007275^biological_process^multicellular organism development	GO:0003677^molecular_function^DNA binding	KEGG:osa:4327441
Solyc02g032860.3	2674.87	1.6	-0.68	4.36238	1.28656528165216e-05	0.000221927194699537	0.16	2274	2149	1951	4008	2581	3094	2298.27	2122.52	1756.85	3797.88	2951.96	3121.73	gene	protein_coding	2	29913880	29916448	+	101257319	APR3_ARATH	5'-adenylylsulfate reductase 3, chloroplastic	Q:2-799	H:118-382	83.459	E:2.51e-171	Eukaryota; Viridiplantae; Streptophyta; Embryophyta; Tracheophyta; Spermatophyta; Magnoliopsida; eudicotyledons; Gunneridae; Pentapetalae; rosids; malvids; Brassicales; Brassicaceae; Camelineae; Arabidopsis	APR3_ARATH	5'-adenylylsulfate reductase 3, chloroplastic	Q:1-266	H:118-382	83.459	E:2.26e-171	Eukaryota; Viridiplantae; Streptophyta; Embryophyta; Tracheophyta; Spermatophyta; Magnoliopsida; eudicotyledons; Gunneridae; Pentapetalae; rosids; malvids; Brassicales; Brassicaceae; Camelineae; Arabidopsis	PF01507.20^PAPS_reduct^Phosphoadenosine phosphosulfate reductase family^1-175^E:4.8e-42	.	GO:0009507^cellular_component^chloroplast`GO:0051539^molecular_function^4 iron, 4 sulfur cluster binding`GO:0033741^molecular_function^adenylyl-sulfate reductase (glutathione) activity`GO:0009973^molecular_function^adenylyl-sulfate reductase activity`GO:0046872^molecular_function^metal ion binding`GO:0019344^biological_process^cysteine biosynthetic process`GO:0000103^biological_process^sulfate as…	GO:0009507^cellular_component^chloroplast`GO:0051539^molecular_function^4 iron, 4 sulfur cluster binding`GO:0033741^molecular_function^adenylyl-sulfate reductase (glutathione) activity`GO:0009973^molecular_function^adenylyl-sulfate reductase activity`GO:0046872^molecular_function^metal ion binding`GO:0019344^biological_process^cysteine biosynthetic process`GO:0000103^biological_process^sulfate as…	GO:0003824^molecular_function^catalytic activity	KEGG:ath:AT4G21990`KO:K05907
Solyc04g010290.3	968.17	1.31	-0.39	4.35859	1.30904291894289e-05	0.000225618033065037	0.09	825	830	951	1151	942	1121	833.81	819.77	856.36	1090.66	1077.39	1131.05	gene	protein_coding	4	3618893	3622894	+	101265913	GT14B_ARATH	Beta-glucuronosyltransferase GlcAT14B {ECO:0000305}	Q:12-464	H:268-419	43.421	E:8.53e-39	Eukaryota; Viridiplantae; Streptophyta; Embryophyta; Tracheophyta; Spermatophyta; Magnoliopsida; eudicotyledons; Gunneridae; Pentapetalae; rosids; malvids; Brassicales; Brassicaceae; Camelineae; Arabidopsis	GT14A_ARATH	Beta-glucuronosyltransferase GlcAT14A {ECO:0000305}	Q:1-168	H:278-446	40.828	E:1.58e-40	Eukaryota; Viridiplantae; Streptophyta; Embryophyta; Tracheophyta; Spermatophyta; Magnoliopsida; eudicotyledons; Gunneridae; Pentapetalae; rosids; malvids; Brassicales; Brassicaceae; Camelineae; Arabidopsis	PF02485.22^Branch^Core-2/I-Branching enzyme^1-75^E:2.4e-10	.	GO:0000139^cellular_component^Golgi membrane`GO:0016021^cellular_component^integral component of membrane`GO:0015020^molecular_function^glucuronosyltransferase activity	GO:0005794^cellular_component^Golgi apparatus`GO:0000139^cellular_component^Golgi membrane`GO:0016021^cellular_component^integral component of membrane`GO:0015020^molecular_function^glucuronosyltransferase activity`GO:0009826^biological_process^unidimensional cell growth	GO:0008375^molecular_function^acetylglucosaminyltransferase activity`GO:0016020^cellular_component^membrane	KEGG:ath:AT5G39990`KO:K20891
Solyc08g080940.3	5364.82	0.57	0.81	-4.35634	1.32257802000025e-05	0.000227762775853508	0.19	5921	7380	8033	3814	4300	3122	5984.2	7289.06	7233.61	3614.05	4918.03	3149.98	gene	protein_coding	8	64205434	64208560	+		SLN1_YEAST	Osmosensing histidine protein kinase SLN1	Q:248-72	H:186-244	27.119	E:3.4	Eukaryota; Fungi; Dikarya; Ascomycota; Saccharomycotina; Saccharomycetes; Saccharomycetales; Saccharomycetaceae; Saccharomyces	.	.	.	.	.	.	.	.	.	GO:0071944^cellular_component^cell periphery`GO:0005887^cellular_component^integral component of plasma membrane`GO:0005886^cellular_component^plasma membrane`GO:0005524^molecular_function^ATP binding`GO:0009927^molecular_function^histidine phosphotransfer kinase activity`GO:0046872^molecular_function^metal ion binding`GO:0005034^molecular_function^osmosensor activity`GO:0000155^molecular_functio…	.	.	KEGG:sce:YIL147C`KO:K11231
Solyc04g054370.1	151.6	2.05	-1.03	4.35613	1.32381463273355e-05	0.000227787790720648	0.24	123	91	94	185	169	240	124.31	89.88	84.65	175.3	193.29	242.15	gene	protein_coding	4	52306068	52306565	-	101246418	BRH1_ARATH	Brassinosteroid-responsive RING protein 1 {ECO:0000303|PubMed:12012249}	Q:160-402	H:70-151	42.683	E:5.06e-17	Eukaryota; Viridiplantae; Streptophyta; Embryophyta; Tracheophyta; Spermatophyta; Magnoliopsida; eudicotyledons; Gunneridae; Pentapetalae; rosids; malvids; Brassicales; Brassicaceae; Camelineae; Arabidopsis	BRH1_ARATH	Brassinosteroid-responsive RING protein 1 {ECO:0000303|PubMed:12012249}	Q:54-134	H:70-151	42.683	E:2.57e-17	Eukaryota; Viridiplantae; Streptophyta; Embryophyta; Tracheophyta; Spermatophyta; Magnoliopsida; eudicotyledons; Gunneridae; Pentapetalae; rosids; malvids; Brassicales; Brassicaceae; Camelineae; Arabidopsis	PF12861.8^zf-ANAPC11^Anaphase-promoting complex subunit 11 RING-H2 finger^71-123^E:6.8e-08`PF12678.8^zf-rbx1^RING-H2 zinc finger domain^74-120^E:5.6e-09`PF13639.7^zf-RING_2^Ring finger domain^76-120^E:9.3e-15`PF13923.7^zf-C3HC4_2^Zinc finger, C3HC4 type (RING finger)^78-119^E:2.1e-10`PF17123.6^zf-RING_11^RING-like zinc finger^78-105^E:1.5e-10`PF00097.26^zf-C3HC4^Zinc finger, C3HC4 type (RING fing…	.	GO:0016021^cellular_component^integral component of membrane`GO:0061630^molecular_function^ubiquitin protein ligase activity`GO:0008270^molecular_function^zinc ion binding`GO:0009742^biological_process^brassinosteroid mediated signaling pathway`GO:0007275^biological_process^multicellular organism development`GO:0016567^biological_process^protein ubiquitination`GO:1901371^biological_process^regula…	GO:0016021^cellular_component^integral component of membrane`GO:0061630^molecular_function^ubiquitin protein ligase activity`GO:0008270^molecular_function^zinc ion binding`GO:0009742^biological_process^brassinosteroid mediated signaling pathway`GO:0007275^biological_process^multicellular organism development`GO:0016567^biological_process^protein ubiquitination`GO:1901371^biological_process^regula…	GO:0004842^molecular_function^ubiquitin-protein transferase activity`GO:0005680^cellular_component^anaphase-promoting complex`GO:0008270^molecular_function^zinc ion binding`GO:0046872^molecular_function^metal ion binding	KEGG:ath:AT3G61460`KO:K16281
Solyc02g080500.3	1723.37	1.37	-0.46	4.35305	1.34254730069461e-05	0.000230820817628483	0.11	1339	1546	1639	2017	1682	2130	1353.29	1526.95	1475.9	1911.26	1923.75	2149.09	gene	protein_coding	2	45254881	45263943	-	101254259	UGPI6_ARATH	Uncharacterized GPI-anchored protein At1g61900	Q:3-605	H:68-260	55.721	E:4.97e-70	Eukaryota; Viridiplantae; Streptophyta; Embryophyta; Tracheophyta; Spermatophyta; Magnoliopsida; eudicotyledons; Gunneridae; Pentapetalae; rosids; malvids; Brassicales; Brassicaceae; Camelineae; Arabidopsis	UGPI6_ARATH	Uncharacterized GPI-anchored protein At1g61900	Q:1-201	H:68-260	57.214	E:1.23e-73	Eukaryota; Viridiplantae; Streptophyta; Embryophyta; Tracheophyta; Spermatophyta; Magnoliopsida; eudicotyledons; Gunneridae; Pentapetalae; rosids; malvids; Brassicales; Brassicaceae; Camelineae; Arabidopsis	PF19160.1^SPARK^SPARK^2-152^E:2.9e-21	.	GO:0031225^cellular_component^anchored component of membrane`GO:0046658^cellular_component^anchored component of plasma membrane`GO:0005634^cellular_component^nucleus`GO:0005886^cellular_component^plasma membrane`GO:0009506^cellular_component^plasmodesma	GO:0031225^cellular_component^anchored component of membrane`GO:0046658^cellular_component^anchored component of plasma membrane`GO:0005634^cellular_component^nucleus`GO:0005886^cellular_component^plasma membrane`GO:0009506^cellular_component^plasmodesma	.	KEGG:ath:AT1G61900
Solyc10g079320.2	166.99	0.37	1.42	-4.35179	1.35030710168189e-05	0.000231963866883163	0.33	247	296	207	88	116	57	249.64	292.35	186.4	83.39	132.67	57.51	gene	protein_coding	10	60998966	61000399	-		ZOG_PHALU	Zeatin O-glucosyltransferase	Q:82-1425	H:20-459	56	E:3.51e-174	Eukaryota; Viridiplantae; Streptophyta; Embryophyta; Tracheophyta; Spermatophyta; Magnoliopsida; eudicotyledons; Gunneridae; Pentapetalae; rosids; fabids; Fabales; Fabaceae; Papilionoideae; 50 kb inversion clade; NPAAA clade; indigoferoid/millettioid clade; Phaseoleae; Phaseolus	ZOG_PHALU	Zeatin O-glucosyltransferase	Q:14-475	H:4-459	56.223	E:1.31e-178	Eukaryota; Viridiplantae; Streptophyta; Embryophyta; Tracheophyta; Spermatophyta; Magnoliopsida; eudicotyledons; Gunneridae; Pentapetalae; rosids; fabids; Fabales; Fabaceae; Papilionoideae; 50 kb inversion clade; NPAAA clade; indigoferoid/millettioid clade; Phaseoleae; Phaseolus	PF00201.19^UDPGT^UDP-glucoronosyl and UDP-glucosyl transferase^277-403^E:1.8e-20	.	GO:0050403^molecular_function^trans-zeatin O-beta-D-glucosyltransferase activity`GO:0050404^molecular_function^zeatin O-beta-D-xylosyltransferase activity`GO:0009690^biological_process^cytokinin metabolic process`GO:0048439^biological_process^flower morphogenesis`GO:0009965^biological_process^leaf morphogenesis`GO:0045926^biological_process^negative regulation of growth`GO:0006486^biological_proc…	GO:0050403^molecular_function^trans-zeatin O-beta-D-glucosyltransferase activity`GO:0050404^molecular_function^zeatin O-beta-D-xylosyltransferase activity`GO:0009690^biological_process^cytokinin metabolic process`GO:0048439^biological_process^flower morphogenesis`GO:0009965^biological_process^leaf morphogenesis`GO:0045926^biological_process^negative regulation of growth`GO:0006486^biological_proc…	GO:0016758^molecular_function^transferase activity, transferring hexosyl groups	KEGG:ag:AAD04166`KO:K13492
Solyc10g007610.3	986.3	0.71	0.49	-4.35132	1.353204040298e-05	0.000232270351390624	0.11	1064	1152	1376	911	727	764	1075.36	1137.81	1239.07	863.24	831.49	770.85	gene	protein_coding	10	1902119	1909185	+		PT314_ARATH	Probable sugar phosphate/phosphate translocator At3g14410	Q:3-74	H:298-321	70.833	E:0.013	Eukaryota; Viridiplantae; Streptophyta; Embryophyta; Tracheophyta; Spermatophyta; Magnoliopsida; eudicotyledons; Gunneridae; Pentapetalae; rosids; malvids; Brassicales; Brassicaceae; Camelineae; Arabidopsis	.	.	.	.	.	.	.	.	.	GO:0022626^cellular_component^cytosolic ribosome`GO:0005768^cellular_component^endosome`GO:0005794^cellular_component^Golgi apparatus`GO:0016021^cellular_component^integral component of membrane`GO:0005802^cellular_component^trans-Golgi network`GO:0015297^molecular_function^antiporter activity`GO:0022857^molecular_function^transmembrane transporter activity`GO:0008643^biological_process^carbohydr…	.	.	KEGG:ath:AT3G14410
Solyc03g082800.2	25.04	0.15	2.7	-4.35088	1.35590675208143e-05	0.000232543021605946	0.62	25	39	74	10	2	8	25.27	38.52	66.64	9.48	2.29	8.07	gene	protein_coding	6	412063	412212	+		Y1704_LACJO	Putative ABC transporter ATP-binding protein LJ_1704	Q:88-8	H:221-247	40.741	E:5.6	Bacteria; Firmicutes; Bacilli; Lactobacillales; Lactobacillaceae; Lactobacillus	.	.	.	.	.	.	.	.	COG1122^ATPase activity	GO:0005886^cellular_component^plasma membrane`GO:0005524^molecular_function^ATP binding`GO:0016887^molecular_function^ATPase activity	.	.	KEGG:ljo:LJ_1704`KO:K01552
Solyc03g119110.3	1527.59	1.42	-0.5	4.35033	1.35935173054674e-05	0.00023294244105067	0.12	1380	1240	1305	1887	1468	1887	1394.73	1224.72	1175.13	1788.07	1678.99	1903.91	gene	protein_coding	3	69287264	69289931	-	101256078	UGPI7_ARATH	Uncharacterized GPI-anchored protein At4g28100	Q:270-785	H:31-198	42.373	E:2.8e-39	Eukaryota; Viridiplantae; Streptophyta; Embryophyta; Tracheophyta; Spermatophyta; Magnoliopsida; eudicotyledons; Gunneridae; Pentapetalae; rosids; malvids; Brassicales; Brassicaceae; Camelineae; Arabidopsis	UGPI7_ARATH	Uncharacterized GPI-anchored protein At4g28100	Q:90-261	H:31-198	42.373	E:1.54e-39	Eukaryota; Viridiplantae; Streptophyta; Embryophyta; Tracheophyta; Spermatophyta; Magnoliopsida; eudicotyledons; Gunneridae; Pentapetalae; rosids; malvids; Brassicales; Brassicaceae; Camelineae; Arabidopsis	PF19160.1^SPARK^SPARK^103-260^E:5.9e-16	.	GO:0031225^cellular_component^anchored component of membrane`GO:0046658^cellular_component^anchored component of plasma membrane`GO:0005886^cellular_component^plasma membrane	GO:0031225^cellular_component^anchored component of membrane`GO:0046658^cellular_component^anchored component of plasma membrane`GO:0005886^cellular_component^plasma membrane	.	KEGG:ath:AT4G28100
Solyc03g111550.3	2483.58	1.58	-0.66	4.3499	1.3619657375344e-05	0.000233198924313518	0.15	1728	1862	2420	2939	3118	2761	1746.44	1839.06	2179.18	2784.92	3566.14	2785.74	gene	protein_coding	3	63633507	63635833	-		GDL57_ARATH	GDSL esterase/lipase At3g48460	Q:150-692	H:34-214	58.511	E:9.58e-74	Eukaryota; Viridiplantae; Streptophyta; Embryophyta; Tracheophyta; Spermatophyta; Magnoliopsida; eudicotyledons; Gunneridae; Pentapetalae; rosids; malvids; Brassicales; Brassicaceae; Camelineae; Arabidopsis	GDL57_ARATH	GDSL esterase/lipase At3g48460	Q:4-216	H:1-214	54.464	E:4.79e-75	Eukaryota; Viridiplantae; Streptophyta; Embryophyta; Tracheophyta; Spermatophyta; Magnoliopsida; eudicotyledons; Gunneridae; Pentapetalae; rosids; malvids; Brassicales; Brassicaceae; Camelineae; Arabidopsis	PF00657.23^Lipase_GDSL^GDSL-like Lipase/Acylhydrolase^41-199^E:1.6e-11	.	GO:0005576^cellular_component^extracellular region`GO:0008126^molecular_function^acetylesterase activity`GO:0006631^biological_process^fatty acid metabolic process`GO:0016042^biological_process^lipid catabolic process	GO:0005576^cellular_component^extracellular region`GO:0008126^molecular_function^acetylesterase activity`GO:0006631^biological_process^fatty acid metabolic process`GO:0016042^biological_process^lipid catabolic process	GO:0016788^molecular_function^hydrolase activity, acting on ester bonds	KEGG:ath:AT3G48460
Solyc01g102700.3	1704.3	0.74	0.44	-4.34844	1.3711123581975e-05	0.000234572599510641	0.1	1829	1946	2347	1479	1327	1410	1848.52	1922.02	2113.44	1401.46	1517.73	1422.64	gene	protein_coding	1	91309948	91318509	+		XPOT_PICGU	Exportin-T	Q:1015-1137	H:473-514	42.857	E:7.7	Eukaryota; Fungi; Dikarya; Ascomycota; Saccharomycotina; Saccharomycetes; Saccharomycetales; Debaryomycetaceae; Meyerozyma	.	.	.	.	.	.	.	.	.	GO:0005737^cellular_component^cytoplasm`GO:0016363^cellular_component^nuclear matrix`GO:0008536^molecular_function^Ran GTPase binding`GO:0000049^molecular_function^tRNA binding`GO:0008033^biological_process^tRNA processing`GO:0071528^biological_process^tRNA re-export from nucleus	.	.	KEGG:pgu:PGUG_04176`KO:K14288
Solyc07g054790.1	13.86	0.05	4.28	-4.34824	1.37234177728899e-05	0.000234590643534609	0.98	44	16	21	1	0	3	44.47	15.8	18.91	0.95	0	3.03	gene	protein_coding	7	63112730	63113002	-	101253603	.	.	.	.	.	.	.	.	.	.	.	.	.	.	.	.	.	.	.	.
Solyc03g117980.3	13267.2	0.23	2.15	-4.34723	1.37869533501726e-05	0.000235483870969561	0.49	13114	21001	34374	4526	6305	3126	13254	20742.2	30953.3	4288.73	7211.2	3154.02	gene	protein_coding	3	68456981	68462916	+	543603	RBOHC_SOLTU	Respiratory burst oxidase homolog protein C	Q:395-997	H:1-201	99.005	E:1.51e-114	Eukaryota; Viridiplantae; Streptophyta; Embryophyta; Tracheophyta; Spermatophyta; Magnoliopsida; eudicotyledons; Gunneridae; Pentapetalae; asterids; lamiids; Solanales; Solanaceae; Solanoideae; Solaneae; Solanum	RBOHC_SOLTU	Respiratory burst oxidase homolog protein C	Q:1-201	H:1-201	99.005	E:5.98e-138	Eukaryota; Viridiplantae; Streptophyta; Embryophyta; Tracheophyta; Spermatophyta; Magnoliopsida; eudicotyledons; Gunneridae; Pentapetalae; asterids; lamiids; Solanales; Solanaceae; Solanoideae; Solaneae; Solanum	PF08414.11^NADPH_Ox^Respiratory burst NADPH oxidase^147-201^E:2.9e-14	.	GO:0016021^cellular_component^integral component of membrane`GO:0005509^molecular_function^calcium ion binding`GO:0050664^molecular_function^oxidoreductase activity, acting on NAD(P)H, oxygen as acceptor`GO:0004601^molecular_function^peroxidase activity	GO:0016021^cellular_component^integral component of membrane`GO:0005509^molecular_function^calcium ion binding`GO:0050664^molecular_function^oxidoreductase activity, acting on NAD(P)H, oxygen as acceptor`GO:0004601^molecular_function^peroxidase activity	GO:0004601^molecular_function^peroxidase activity`GO:0050664^molecular_function^oxidoreductase activity, acting on NAD(P)H, oxygen as acceptor`GO:0055114^biological_process^oxidation-reduction process	KEGG:sot:102598898`KO:K13447
Solyc08g014430.3	347.36	1.59	-0.67	4.34529	1.39093294221559e-05	0.000237379823139197	0.15	293	253	287	446	333	472	296.13	249.88	258.44	422.62	380.86	476.23	gene	protein_coding	8	4476693	4481329	+	101249109	FH6_ARATH	Formin-like protein 6	Q:1426-1536	H:450-488	76.923	E:3.87e-10	Eukaryota; Viridiplantae; Streptophyta; Embryophyta; Tracheophyta; Spermatophyta; Magnoliopsida; eudicotyledons; Gunneridae; Pentapetalae; rosids; malvids; Brassicales; Brassicaceae; Camelineae; Arabidopsis	FH2_ARATH	Formin-like protein 2	Q:215-390	H:321-474	35.263	E:2.52e-11	Eukaryota; Viridiplantae; Streptophyta; Embryophyta; Tracheophyta; Spermatophyta; Magnoliopsida; eudicotyledons; Gunneridae; Pentapetalae; rosids; malvids; Brassicales; Brassicaceae; Camelineae; Arabidopsis	.	.	GO:0005618^cellular_component^cell wall`GO:0005737^cellular_component^cytoplasm`GO:0016021^cellular_component^integral component of membrane`GO:0005730^cellular_component^nucleolus`GO:0005634^cellular_component^nucleus`GO:0009524^cellular_component^phragmoplast`GO:0005886^cellular_component^plasma membrane`GO:0005819^cellular_component^spindle`GO:0003779^molecular_function^actin binding	GO:0016021^cellular_component^integral component of membrane`GO:0005886^cellular_component^plasma membrane`GO:0003779^molecular_function^actin binding`GO:0051016^biological_process^barbed-end actin filament capping`GO:0010497^biological_process^plasmodesmata-mediated intercellular transport	.	KEGG:ath:AT2G43800
Solyc08g005100.3	158.62	1.93	-0.95	4.34326	1.4038505652744e-05	0.000239388635607902	0.22	135	92	109	224	197	187	136.44	90.87	98.15	212.26	225.31	188.68	gene	protein_coding	8	69934	72930	+	101268014	HUT1_YARLI	UDP-galactose transporter homolog 1	Q:82-216	H:67-112	32.609	E:3.7	Eukaryota; Fungi; Dikarya; Ascomycota; Saccharomycotina; Saccharomycetes; Saccharomycetales; Dipodascaceae; Yarrowia	.	.	.	.	.	.	.	.	.	GO:0030176^cellular_component^integral component of endoplasmic reticulum membrane`GO:0030173^cellular_component^integral component of Golgi membrane`GO:0022857^molecular_function^transmembrane transporter activity`GO:0005459^molecular_function^UDP-galactose transmembrane transporter activity`GO:0005460^molecular_function^UDP-glucose transmembrane transporter activity`GO:0008643^biological_proces…	.	.	KEGG:yli:YALI0E22957g`KO:K15275
Solyc08g078190.1	1308.22	0.36	1.46	-4.3422	1.41060974757574e-05	0.00024034487062368	0.34	1650	2000	2347	514	1015	441	1667.61	1975.36	2113.44	487.05	1160.88	444.95	gene	protein_coding	8	62147117	62148085	+	101267548	EF102_ARATH	Ethylene-responsive transcription factor 5	Q:283-738	H:89-218	55.921	E:1.09e-34	Eukaryota; Viridiplantae; Streptophyta; Embryophyta; Tracheophyta; Spermatophyta; Magnoliopsida; eudicotyledons; Gunneridae; Pentapetalae; rosids; malvids; Brassicales; Brassicaceae; Camelineae; Arabidopsis	ERF5_TOBAC	Ethylene-responsive transcription factor 5	Q:113-322	H:90-291	48.624	E:8.07e-58	Eukaryota; Viridiplantae; Streptophyta; Embryophyta; Tracheophyta; Spermatophyta; Magnoliopsida; eudicotyledons; Gunneridae; Pentapetalae; asterids; lamiids; Solanales; Solanaceae; Nicotianoideae; Nicotianeae; Nicotiana	PF00847.21^AP2^AP2 domain^183-233^E:2.3e-15	.	GO:0005634^cellular_component^nucleus`GO:0003677^molecular_function^DNA binding`GO:0003700^molecular_function^DNA-binding transcription factor activity`GO:0006952^biological_process^defense response`GO:0009873^biological_process^ethylene-activated signaling pathway`GO:0010200^biological_process^response to chitin`GO:0009409^biological_process^response to cold	GO:0005634^cellular_component^nucleus`GO:0003677^molecular_function^DNA binding`GO:0003700^molecular_function^DNA-binding transcription factor activity`GO:0006952^biological_process^defense response`GO:0009873^biological_process^ethylene-activated signaling pathway	GO:0003700^molecular_function^DNA-binding transcription factor activity`GO:0006355^biological_process^regulation of transcription, DNA-templated	KEGG:nta:107790518`KO:K09286
Solyc09g061230.3	542.8	0.66	0.6	-4.33759	1.44053878303109e-05	0.000245244090370513	0.14	691	670	669	429	351	482	698.38	661.74	602.43	406.51	401.45	486.32	gene	protein_coding	9	58615910	58619076	+	101256120	CYB5_TOBAC	Cytochrome b5	Q:3-254	H:53-136	96.429	E:3.09e-40	Eukaryota; Viridiplantae; Streptophyta; Embryophyta; Tracheophyta; Spermatophyta; Magnoliopsida; eudicotyledons; Gunneridae; Pentapetalae; asterids; lamiids; Solanales; Solanaceae; Nicotianoideae; Nicotianeae; Nicotiana	.	.	.	.	.	.	.	.	.	GO:0005789^cellular_component^endoplasmic reticulum membrane`GO:0016021^cellular_component^integral component of membrane`GO:0043231^cellular_component^intracellular membrane-bounded organelle`GO:0016020^cellular_component^membrane`GO:0009055^molecular_function^electron transfer activity`GO:0020037^molecular_function^heme binding`GO:0046872^molecular_function^metal ion binding	.	.	KEGG:nta:107781159`KEGG:nta:107816859`KO:K23490
Solyc05g018180.3	945.15	0.52	0.93	-4.33669	1.44644453925644e-05	0.000246048821706279	0.21	902	1271	1723	724	622	550	911.63	1255.34	1551.54	686.04	711.4	554.93	gene	protein_coding	5	20185182	20190604	-	101265640	UNC13_ARATH	Protein unc-13 homolog {ECO:0000305}	Q:3-890	H:796-1087	29.967	E:8.42e-30	Eukaryota; Viridiplantae; Streptophyta; Embryophyta; Tracheophyta; Spermatophyta; Magnoliopsida; eudicotyledons; Gunneridae; Pentapetalae; rosids; malvids; Brassicales; Brassicaceae; Camelineae; Arabidopsis	UNC13_ARATH	Protein unc-13 homolog {ECO:0000305}	Q:1-307	H:796-1098	30.818	E:4.19e-36	Eukaryota; Viridiplantae; Streptophyta; Embryophyta; Tracheophyta; Spermatophyta; Magnoliopsida; eudicotyledons; Gunneridae; Pentapetalae; rosids; malvids; Brassicales; Brassicaceae; Camelineae; Arabidopsis	PF05664.12^UNC_13_homolog^Unc-13 homolog^1-73^E:1.2e-16	.	GO:0005737^cellular_component^cytoplasm`GO:0005886^cellular_component^plasma membrane`GO:0009506^cellular_component^plasmodesma`GO:0010118^biological_process^stomatal movement	GO:0005737^cellular_component^cytoplasm`GO:0005886^cellular_component^plasma membrane`GO:0009506^cellular_component^plasmodesma`GO:0010118^biological_process^stomatal movement	.	KEGG:ath:AT5G06970
Solyc09g074520.3	3972.63	1.41	-0.49	4.33517	1.45647716420431e-05	0.000247553675661827	0.11	3580	3366	3294	4926	4274	4332	3618.21	3324.52	2966.2	4667.76	4888.29	4370.82	gene	protein_coding	9	66755672	66759654	+	100316892	TIR1_ARATH	Protein TRANSPORT INHIBITOR RESPONSE 1	Q:1-795	H:321-585	81.132	E:1.55e-150	Eukaryota; Viridiplantae; Streptophyta; Embryophyta; Tracheophyta; Spermatophyta; Magnoliopsida; eudicotyledons; Gunneridae; Pentapetalae; rosids; malvids; Brassicales; Brassicaceae; Camelineae; Arabidopsis	TIR1_ARATH	Protein TRANSPORT INHIBITOR RESPONSE 1	Q:1-265	H:321-585	81.132	E:5.42e-153	Eukaryota; Viridiplantae; Streptophyta; Embryophyta; Tracheophyta; Spermatophyta; Magnoliopsida; eudicotyledons; Gunneridae; Pentapetalae; rosids; malvids; Brassicales; Brassicaceae; Camelineae; Arabidopsis`TIR1_ARATH	PF13516.7^LRR_6^Leucine Rich repeat^5-14^E:640`PF13516.7^LRR_6^Leucine Rich repeat^36-41^E:14000`PF13516.7^LRR_6^Leucine Rich repeat^113-121^E:3700`PF13516.7^LRR_6^Leucine Rich repeat^162-179^E:2.4`PF13516.7^LRR_6^Leucine Rich repeat^187-199^E:4900	.	GO:0005634^cellular_component^nucleus`GO:0019005^cellular_component^SCF ubiquitin ligase complex`GO:0010011^molecular_function^auxin binding`GO:0038198^molecular_function^auxin receptor activity`GO:0000822^molecular_function^inositol hexakisphosphate binding`GO:0004842^molecular_function^ubiquitin-protein transferase activity`GO:0009734^biological_process^auxin-activated signaling pathway`GO:0007…	GO:0005634^cellular_component^nucleus`GO:0019005^cellular_component^SCF ubiquitin ligase complex`GO:0010011^molecular_function^auxin binding`GO:0038198^molecular_function^auxin receptor activity`GO:0000822^molecular_function^inositol hexakisphosphate binding`GO:0004842^molecular_function^ubiquitin-protein transferase activity`GO:0009734^biological_process^auxin-activated signaling pathway`GO:0007…	GO:0005515^molecular_function^protein binding	KEGG:ath:AT3G62980`KO:K14485
Solyc12g089010.2	140.24	0.49	1.02	-4.33439	1.46162739506963e-05	0.000248226907973094	0.24	225	152	207	100	91	78	227.4	150.13	186.4	94.76	104.08	78.7	gene	protein_coding	12	65158386	65161219	+		PRP16_ARATH	Pre-mRNA-splicing factor ATP-dependent RNA helicase DEAH7 {ECO:0000305}	Q:14-1759	H:400-984	80.579	E:0	Eukaryota; Viridiplantae; Streptophyta; Embryophyta; Tracheophyta; Spermatophyta; Magnoliopsida; eudicotyledons; Gunneridae; Pentapetalae; rosids; malvids; Brassicales; Brassicaceae; Camelineae; Arabidopsis	PRP16_ARATH	Pre-mRNA-splicing factor ATP-dependent RNA helicase DEAH7 {ECO:0000305}	Q:5-586	H:400-984	80.579	E:0	Eukaryota; Viridiplantae; Streptophyta; Embryophyta; Tracheophyta; Spermatophyta; Magnoliopsida; eudicotyledons; Gunneridae; Pentapetalae; rosids; malvids; Brassicales; Brassicaceae; Camelineae; Arabidopsis	PF00270.30^DEAD^DEAD/DEAH box helicase^167-319^E:2.5e-05`PF09848.10^DUF2075^Uncharacterized conserved protein (DUF2075)^177-283^E:5.3e-06`PF00271.32^Helicase_C^Helicase conserved C-terminal domain^367-494^E:1.3e-12`PF04408.24^HA2^Helicase associated domain (HA2)^558-586^E:1.4e-05	.	GO:0005634^cellular_component^nucleus`GO:0005681^cellular_component^spliceosomal complex`GO:0005524^molecular_function^ATP binding`GO:0003723^molecular_function^RNA binding`GO:0003724^molecular_function^RNA helicase activity`GO:0009817^biological_process^defense response to fungus, incompatible interaction`GO:0009793^biological_process^embryo development ending in seed dormancy`GO:0010467^biologi…	GO:0005634^cellular_component^nucleus`GO:0005681^cellular_component^spliceosomal complex`GO:0005524^molecular_function^ATP binding`GO:0003723^molecular_function^RNA binding`GO:0003724^molecular_function^RNA helicase activity`GO:0009817^biological_process^defense response to fungus, incompatible interaction`GO:0009793^biological_process^embryo development ending in seed dormancy`GO:0010467^biologi…	GO:0003676^molecular_function^nucleic acid binding`GO:0005524^molecular_function^ATP binding`GO:0004386^molecular_function^helicase activity	KEGG:ath:AT5G13010`KO:K12815
Solyc09g014940.2	349.77	3.31	-1.73	4.3288	1.49927317651482e-05	0.000254413249920466	0.4	283	103	110	722	400	466	286.02	101.73	99.05	684.15	457.49	470.18	gene	protein_coding	9	7254009	7254317	-		WUN1_SOLTU	Wound-induced protein 1	Q:4-306	H:1-105	40.187	E:3.1e-18	Eukaryota; Viridiplantae; Streptophyta; Embryophyta; Tracheophyta; Spermatophyta; Magnoliopsida; eudicotyledons; Gunneridae; Pentapetalae; asterids; lamiids; Solanales; Solanaceae; Solanoideae; Solaneae; Solanum	WUN1_SOLTU	Wound-induced protein 1	Q:2-102	H:1-105	40.187	E:2.79e-18	Eukaryota; Viridiplantae; Streptophyta; Embryophyta; Tracheophyta; Spermatophyta; Magnoliopsida; eudicotyledons; Gunneridae; Pentapetalae; asterids; lamiids; Solanales; Solanaceae; Solanoideae; Solaneae; Solanum	PF07107.12^WI12^Wound-induced protein WI12^2-102^E:7.1e-33	.	.	.	.	.
Solyc01g103650.3	1008.7	0.57	0.81	-4.32733	1.50929408072404e-05	0.000255905654369392	0.19	1136	1206	1682	696	787	633	1148.12	1191.14	1514.62	659.51	900.11	638.67	gene	protein_coding	1	92076383	92082983	+	101244716	.	.	.	.	.	.	.	.	.	.	.	.	.	.	.	.	.	.	.	.
Solyc09g090040.3	1114.87	0.77	0.39	-4.32613	1.5175135429041e-05	0.000257090443729662	0.09	1259	1295	1374	1012	878	929	1272.44	1279.04	1237.27	958.95	1004.19	937.33	gene	protein_coding	9	70068623	70070179	-	109121167	GL17_ARATH	Germin-like protein subfamily 1 member 7	Q:3-554	H:44-223	51.087	E:7.66e-60	Eukaryota; Viridiplantae; Streptophyta; Embryophyta; Tracheophyta; Spermatophyta; Magnoliopsida; eudicotyledons; Gunneridae; Pentapetalae; rosids; malvids; Brassicales; Brassicaceae; Camelineae; Arabidopsis	GL17_ARATH	Germin-like protein subfamily 1 member 7	Q:1-184	H:44-223	51.087	E:6.46e-60	Eukaryota; Viridiplantae; Streptophyta; Embryophyta; Tracheophyta; Spermatophyta; Magnoliopsida; eudicotyledons; Gunneridae; Pentapetalae; rosids; malvids; Brassicales; Brassicaceae; Camelineae; Arabidopsis	PF00190.23^Cupin_1^Cupin^32-175^E:1.5e-38`PF07883.12^Cupin_2^Cupin domain^61-135^E:1.5e-07	.	GO:0048046^cellular_component^apoplast`GO:0005618^cellular_component^cell wall`GO:0030145^molecular_function^manganese ion binding`GO:0045735^molecular_function^nutrient reservoir activity	GO:0048046^cellular_component^apoplast`GO:0005618^cellular_component^cell wall`GO:0030145^molecular_function^manganese ion binding`GO:0045735^molecular_function^nutrient reservoir activity	GO:0045735^molecular_function^nutrient reservoir activity	KEGG:ath:AT3G05950
Solyc07g054420.2	439.58	1.44	-0.52	4.32559	1.52122967782942e-05	0.000257510996234028	0.12	365	367	390	506	471	532	368.9	362.48	351.19	479.47	538.7	536.77	gene	protein_coding	7	62861979	62868411	+		GLFT_PICTO	Glutamate formimidoyltransferase	Q:3-365	H:125-239	28.906	E:1.83e-05	Archaea; Euryarchaeota; Diaforarchaea group; Thermoplasmata; Thermoplasmatales; Picrophilaceae; Picrophilus	GLFT_PICTO	Glutamate formimidoyltransferase	Q:1-121	H:125-239	28.906	E:3.54e-06	Archaea; Euryarchaeota; Diaforarchaea group; Thermoplasmata; Thermoplasmatales; Picrophilaceae; Picrophilus	PF07837.13^FTCD_N^Formiminotransferase domain, N-terminal subdomain^1-66^E:2.8e-08	.	GO:0005737^cellular_component^cytoplasm`GO:0030272^molecular_function^5-formyltetrahydrofolate cyclo-ligase activity`GO:0005542^molecular_function^folic acid binding`GO:0030409^molecular_function^glutamate formimidoyltransferase activity`GO:0019556^biological_process^histidine catabolic process to glutamate and formamide`GO:0019557^biological_process^histidine catabolic process to glutamate and f…	GO:0005737^cellular_component^cytoplasm`GO:0030272^molecular_function^5-formyltetrahydrofolate cyclo-ligase activity`GO:0005542^molecular_function^folic acid binding`GO:0030409^molecular_function^glutamate formimidoyltransferase activity`GO:0019556^biological_process^histidine catabolic process to glutamate and formamide`GO:0019557^biological_process^histidine catabolic process to glutamate and f…	GO:0005542^molecular_function^folic acid binding`GO:0016740^molecular_function^transferase activity	KEGG:pto:PTO1242`KO:K00603
Solyc08g016000.1	877.29	0.69	0.54	-4.31985	1.56137509755879e-05	0.000264092552967967	0.12	1070	1124	1025	726	668	691	1081.42	1110.15	923	687.94	764.01	697.19	gene	protein_coding	8	6544012	6544365	+		TI214_SOLLC	Protein TIC 214 {ECO:0000250|UniProtKB:P56785}	Q:1-342	H:443-556	96.491	E:1.39e-52	Eukaryota; Viridiplantae; Streptophyta; Embryophyta; Tracheophyta; Spermatophyta; Magnoliopsida; eudicotyledons; Gunneridae; Pentapetalae; asterids; lamiids; Solanales; Solanaceae; Solanoideae; Solaneae; Solanum; Solanum subgen. Lycopersicon	TI214_SOLLC	Protein TIC 214 {ECO:0000250|UniProtKB:P56785}	Q:1-114	H:443-556	96.491	E:6.03e-67	Eukaryota; Viridiplantae; Streptophyta; Embryophyta; Tracheophyta; Spermatophyta; Magnoliopsida; eudicotyledons; Gunneridae; Pentapetalae; asterids; lamiids; Solanales; Solanaceae; Solanoideae; Solaneae; Solanum; Solanum subgen. Lycopersicon	PF05758.13^Ycf1^Ycf1^1-116^E:3.1e-45	.	GO:0009706^cellular_component^chloroplast inner membrane`GO:0016021^cellular_component^integral component of membrane`GO:0015031^biological_process^protein transport	GO:0009706^cellular_component^chloroplast inner membrane`GO:0016021^cellular_component^integral component of membrane`GO:0015031^biological_process^protein transport	GO:0016021^cellular_component^integral component of membrane	KEGG:sly:3950474
Solyc11g006550.2	2047.04	0.69	0.53	-4.31952	1.56372191764034e-05	0.000264275334939183	0.12	2177	2383	3009	1699	1584	1583	2200.24	2353.64	2709.56	1609.93	1811.66	1597.19	gene	protein_coding	11	1191912	1201390	-		PTAL_PESFW	Oxidoreductase ptaL {ECO:0000303|PubMed:24302702}	Q:6-440	H:144-288	35.099	E:8.19e-17	Eukaryota; Fungi; Dikarya; Ascomycota; Pezizomycotina; Sordariomycetes; Xylariomycetidae; Xylariales; Sporocadaceae; Pestalotiopsis	PTAL_PESFW	Oxidoreductase ptaL {ECO:0000303|PubMed:24302702}	Q:2-146	H:144-288	35.099	E:7.37e-17	Eukaryota; Fungi; Dikarya; Ascomycota; Pezizomycotina; Sordariomycetes; Xylariomycetidae; Xylariales; Sporocadaceae; Pestalotiopsis	PF07992.15^Pyr_redox_2^Pyridine nucleotide-disulphide oxidoreductase^7-145^E:1.4e-24`PF00070.28^Pyr_redox^Pyridine nucleotide-disulphide oxidoreductase^9-74^E:1.5e-11	.	GO:0016491^molecular_function^oxidoreductase activity	GO:0016491^molecular_function^oxidoreductase activity	GO:0016491^molecular_function^oxidoreductase activity`GO:0055114^biological_process^oxidation-reduction process	KEGG:pfy:PFICI_10837`KO:K22745
Solyc02g086260.1	207.36	0.5	1	-4.31767	1.57686060240983e-05	0.000266280214348689	0.23	273	285	301	100	143	156	275.91	281.49	271.05	94.76	163.55	157.4	gene	protein_coding	2	49613675	49614136	-	104645727	HSLJ_ECOLI	Heat shock protein HslJ	Q:177-389	H:61-127	29.577	E:0.21	Bacteria; Proteobacteria; Gammaproteobacteria; Enterobacterales; Enterobacteriaceae; Escherichia	GT2D1_MOUSE	General transcription factor II-I repeat domain-containing protein 1	Q:20-88	H:860-925	26.027	E:3	Eukaryota; Metazoa; Chordata; Craniata; Vertebrata; Euteleostomi; Mammalia; Eutheria; Euarchontoglires; Glires; Rodentia; Myomorpha; Muroidea; Muridae; Murinae; Mus; Mus	.	COG3187^Heat shock protein HslJ	GO:0009408^biological_process^response to heat	GO:0005829^cellular_component^cytosol`GO:0005654^cellular_component^nucleoplasm`GO:0005634^cellular_component^nucleus`GO:0003677^molecular_function^DNA binding`GO:0003700^molecular_function^DNA-binding transcription factor activity`GO:0007275^biological_process^multicellular organism development`GO:0006366^biological_process^transcription by RNA polymerase II`GO:0014886^biological_process^transit…	.	KEGG:mmu:57080`KO:K03121
Solyc06g073860.2	1341.6	0.73	0.45	-4.31622	1.58722029852213e-05	0.000267812951259127	0.1	1492	1540	1791	1191	1071	1045	1507.92	1521.02	1612.77	1128.56	1224.93	1054.37	gene	protein_coding	6	45748408	45752119	+		RHF2A_ARATH	E3 ubiquitin-protein ligase RHF2A {ECO:0000305}	Q:1-357	H:121-236	48.76	E:1.06e-06	Eukaryota; Viridiplantae; Streptophyta; Embryophyta; Tracheophyta; Spermatophyta; Magnoliopsida; eudicotyledons; Gunneridae; Pentapetalae; rosids; malvids; Brassicales; Brassicaceae; Camelineae; Arabidopsis	RHF2A_ARATH	E3 ubiquitin-protein ligase RHF2A {ECO:0000305}	Q:1-119	H:121-236	48.76	E:3.07e-18	Eukaryota; Viridiplantae; Streptophyta; Embryophyta; Tracheophyta; Spermatophyta; Magnoliopsida; eudicotyledons; Gunneridae; Pentapetalae; rosids; malvids; Brassicales; Brassicaceae; Camelineae; Arabidopsis	.	.	GO:0005886^cellular_component^plasma membrane`GO:0046872^molecular_function^metal ion binding`GO:0004842^molecular_function^ubiquitin-protein transferase activity`GO:0009561^biological_process^megagametogenesis`GO:0055046^biological_process^microgametogenesis`GO:0051603^biological_process^proteolysis involved in cellular protein catabolic process`GO:0051726^biological_process^regulation of cell c…	GO:0005886^cellular_component^plasma membrane`GO:0046872^molecular_function^metal ion binding`GO:0004842^molecular_function^ubiquitin-protein transferase activity`GO:0009561^biological_process^megagametogenesis`GO:0055046^biological_process^microgametogenesis`GO:0051603^biological_process^proteolysis involved in cellular protein catabolic process`GO:0051726^biological_process^regulation of cell c…	.	KEGG:ath:AT5G22000`KO:K19043
Solyc01g007010.3	3775.28	0.22	2.21	-4.31378	1.60486757902719e-05	0.00027057185871935	0.51	5556	6389	7450	1045	1987	748	5615.3	6310.28	6708.62	990.22	2272.59	754.7	gene	protein_coding	1	1567452	1572335	+		PUB23_ARATH	E3 ubiquitin-protein ligase PUB23	Q:1-1239	H:1-410	54.306	E:1.38e-165	Eukaryota; Viridiplantae; Streptophyta; Embryophyta; Tracheophyta; Spermatophyta; Magnoliopsida; eudicotyledons; Gunneridae; Pentapetalae; rosids; malvids; Brassicales; Brassicaceae; Camelineae; Arabidopsis	PUB23_ARATH	E3 ubiquitin-protein ligase PUB23	Q:1-413	H:1-410	54.306	E:1.15e-165	Eukaryota; Viridiplantae; Streptophyta; Embryophyta; Tracheophyta; Spermatophyta; Magnoliopsida; eudicotyledons; Gunneridae; Pentapetalae; rosids; malvids; Brassicales; Brassicaceae; Camelineae; Arabidopsis	PF04564.16^U-box^U-box domain^12-83^E:8.1e-21	.	GO:0005829^cellular_component^cytosol`GO:0004842^molecular_function^ubiquitin-protein transferase activity`GO:0006952^biological_process^defense response`GO:0051865^biological_process^protein autoubiquitination`GO:0016567^biological_process^protein ubiquitination`GO:0002679^biological_process^respiratory burst involved in defense response`GO:0010200^biological_process^response to chitin`GO:000941…	GO:0005829^cellular_component^cytosol`GO:0004842^molecular_function^ubiquitin-protein transferase activity`GO:0006952^biological_process^defense response`GO:0051865^biological_process^protein autoubiquitination`GO:0016567^biological_process^protein ubiquitination`GO:0002679^biological_process^respiratory burst involved in defense response`GO:0010200^biological_process^response to chitin`GO:000941…	GO:0004842^molecular_function^ubiquitin-protein transferase activity`GO:0016567^biological_process^protein ubiquitination	KEGG:ath:AT2G35930
Solyc12g005270.2	3106.23	1.29	-0.36	4.31275	1.61234480779864e-05	0.000271613081746354	0.08	2721	2654	3088	3776	2897	3562	2750.04	2621.3	2780.7	3578.04	3313.38	3593.92	gene	protein_coding	12	167635	168278	-	101262690	H2A6_ARATH	Histone H2A.6	Q:72-221	H:1-50	96	E:1.47e-13	Eukaryota; Viridiplantae; Streptophyta; Embryophyta; Tracheophyta; Spermatophyta; Magnoliopsida; eudicotyledons; Gunneridae; Pentapetalae; rosids; malvids; Brassicales; Brassicaceae; Camelineae; Arabidopsis	.	.	.	.	.	.	.	.	.	GO:0000790^cellular_component^nuclear chromatin`GO:0005730^cellular_component^nucleolus`GO:0000786^cellular_component^nucleosome`GO:0009536^cellular_component^plastid`GO:0003677^molecular_function^DNA binding`GO:0046982^molecular_function^protein heterodimerization activity`GO:0006325^biological_process^chromatin organization`GO:0006342^biological_process^chromatin silencing`GO:0009294^biological…	.	.	KEGG:ath:AT5G54640`KO:K11251
Solyc02g065570.1	1145.76	0.34	1.57	-4.3118	1.61928045174678e-05	0.000272341833915059	0.36	1810	1742	1770	340	877	402	1829.32	1720.54	1593.86	322.18	1003.05	405.6	gene	protein_coding	2	37299465	37299617	+	104645948	CLU_DROVI	Protein clueless {ECO:0000255|HAMAP-Rule:MF_03013}	Q:7-132	H:1144-1185	35.714	E:1.9	Eukaryota; Metazoa; Ecdysozoa; Arthropoda; Hexapoda; Insecta; Pterygota; Neoptera; Holometabola; Diptera; Brachycera; Muscomorpha; Ephydroidea; Drosophilidae; Drosophila	.	.	.	.	.	.	.	.	.	GO:0005783^cellular_component^endoplasmic reticulum`GO:0031315^cellular_component^extrinsic component of mitochondrial outer membrane`GO:0005794^cellular_component^Golgi apparatus`GO:0072686^cellular_component^mitotic spindle`GO:0098799^cellular_component^outer mitochondrial membrane protein complex`GO:0003729^molecular_function^mRNA binding`GO:0043022^molecular_function^ribosome binding`GO:00550…	.	.	KEGG:dvi:6626877`KO:K03255
Solyc09g005000.1	2184.63	0.42	1.26	-4.31188	1.61873561519156e-05	0.000272341833915059	0.29	2558	2802	4327	1216	1642	821	2585.3	2767.47	3896.41	1152.25	1878	828.36	gene	protein_coding	9	6030	8054	+	101258589	LRK63_ARATH	Lectin-domain containing receptor kinase VI.3	Q:25-1914	H:1-653	49.924	E:0	Eukaryota; Viridiplantae; Streptophyta; Embryophyta; Tracheophyta; Spermatophyta; Magnoliopsida; eudicotyledons; Gunneridae; Pentapetalae; rosids; malvids; Brassicales; Brassicaceae; Camelineae; Arabidopsis	LRK63_ARATH	Lectin-domain containing receptor kinase VI.3	Q:9-638	H:1-653	49.924	E:0	Eukaryota; Viridiplantae; Streptophyta; Embryophyta; Tracheophyta; Spermatophyta; Magnoliopsida; eudicotyledons; Gunneridae; Pentapetalae; rosids; malvids; Brassicales; Brassicaceae; Camelineae; Arabidopsis	PF00139.20^Lectin_legB^Legume lectin domain^26-274^E:8.4e-70`PF00069.26^Pkinase^Protein kinase domain^345-614^E:1.4e-49`PF07714.18^PK_Tyr_Ser-Thr^Protein tyrosine and serine/threonine kinase^348-616^E:5.2e-44	.	GO:0016021^cellular_component^integral component of membrane`GO:0005886^cellular_component^plasma membrane`GO:0005524^molecular_function^ATP binding`GO:0030246^molecular_function^carbohydrate binding`GO:0004675^molecular_function^transmembrane receptor protein serine/threonine kinase activity`GO:0009738^biological_process^abscisic acid-activated signaling pathway`GO:0006952^biological_process^def…	GO:0016021^cellular_component^integral component of membrane`GO:0005886^cellular_component^plasma membrane`GO:0005524^molecular_function^ATP binding`GO:0030246^molecular_function^carbohydrate binding`GO:0004675^molecular_function^transmembrane receptor protein serine/threonine kinase activity`GO:0009738^biological_process^abscisic acid-activated signaling pathway`GO:0006952^biological_process^def…	GO:0030246^molecular_function^carbohydrate binding`GO:0004672^molecular_function^protein kinase activity`GO:0005524^molecular_function^ATP binding`GO:0006468^biological_process^protein phosphorylation	.
Solyc02g063520.3	610.87	0.59	0.77	-4.31124	1.62343601407879e-05	0.000272820905683192	0.18	676	731	1003	471	460	381	683.22	721.99	903.19	446.31	526.11	384.41	gene	protein_coding	2	36162030	36163596	+		HAT9_ARATH	Homeobox-leucine zipper protein HAT9	Q:169-561	H:8-136	44.056	E:1.11e-12	Eukaryota; Viridiplantae; Streptophyta; Embryophyta; Tracheophyta; Spermatophyta; Magnoliopsida; eudicotyledons; Gunneridae; Pentapetalae; rosids; malvids; Brassicales; Brassicaceae; Camelineae; Arabidopsis	HAT9_ARATH	Homeobox-leucine zipper protein HAT9	Q:57-187	H:8-136	44.056	E:9.44e-13	Eukaryota; Viridiplantae; Streptophyta; Embryophyta; Tracheophyta; Spermatophyta; Magnoliopsida; eudicotyledons; Gunneridae; Pentapetalae; rosids; malvids; Brassicales; Brassicaceae; Camelineae; Arabidopsis	.	.	GO:0005634^cellular_component^nucleus`GO:0003700^molecular_function^DNA-binding transcription factor activity`GO:0043565^molecular_function^sequence-specific DNA binding	GO:0005634^cellular_component^nucleus`GO:0003700^molecular_function^DNA-binding transcription factor activity`GO:0043565^molecular_function^sequence-specific DNA binding	.	KEGG:ath:AT2G22800`KO:K09338
Solyc01g098190.3	1999.29	1.4	-0.48	4.31043	1.62935154659315e-05	0.000273594734356333	0.11	1672	1569	1960	2592	2118	2094	1689.85	1549.67	1764.95	2456.12	2422.41	2112.77	gene	protein_coding	1	88656519	88662648	+	778261	NHX1_ARATH	Sodium/hydrogen exchanger 1	Q:1-312	H:430-532	54.717	E:5.14e-26	Eukaryota; Viridiplantae; Streptophyta; Embryophyta; Tracheophyta; Spermatophyta; Magnoliopsida; eudicotyledons; Gunneridae; Pentapetalae; rosids; malvids; Brassicales; Brassicaceae; Camelineae; Arabidopsis	NHX1_ARATH	Sodium/hydrogen exchanger 1	Q:1-104	H:430-532	54.717	E:3.44e-28	Eukaryota; Viridiplantae; Streptophyta; Embryophyta; Tracheophyta; Spermatophyta; Magnoliopsida; eudicotyledons; Gunneridae; Pentapetalae; rosids; malvids; Brassicales; Brassicaceae; Camelineae; Arabidopsis	.	.	GO:0005789^cellular_component^endoplasmic reticulum membrane`GO:0000139^cellular_component^Golgi membrane`GO:0016021^cellular_component^integral component of membrane`GO:0000325^cellular_component^plant-type vacuole`GO:0005886^cellular_component^plasma membrane`GO:0009536^cellular_component^plastid`GO:0005774^cellular_component^vacuolar membrane`GO:0005773^cellular_component^vacuole`GO:0005516^mo…	GO:0005789^cellular_component^endoplasmic reticulum membrane`GO:0000139^cellular_component^Golgi membrane`GO:0016021^cellular_component^integral component of membrane`GO:0000325^cellular_component^plant-type vacuole`GO:0005886^cellular_component^plasma membrane`GO:0009536^cellular_component^plastid`GO:0005774^cellular_component^vacuolar membrane`GO:0005773^cellular_component^vacuole`GO:0005516^mo…	.	KEGG:ath:AT5G27150
Solyc01g111110.3	428.3	2.12	-1.09	4.31	1.63252124224844e-05	0.000273906618715511	0.25	360	246	241	727	387	609	363.84	242.97	217.02	688.89	442.62	614.46	gene	protein_coding	1	97404048	97404450	+		.	.	.	.	.	.	.	.	.	.	.	.	.	.	.	.	.	.	.	.
Solyc03g007220.3	1504.8	0.64	0.65	-4.30693	1.65538987330371e-05	0.000277520461330081	0.15	1629	1928	2178	1201	1196	1002	1646.39	1904.24	1961.26	1138.04	1367.9	1010.98	gene	protein_coding	3	1783277	1783911	+		GL24_ARATH	Germin-like protein subfamily 2 member 4	Q:379-230	H:165-212	38	E:8.5	Eukaryota; Viridiplantae; Streptophyta; Embryophyta; Tracheophyta; Spermatophyta; Magnoliopsida; eudicotyledons; Gunneridae; Pentapetalae; rosids; malvids; Brassicales; Brassicaceae; Camelineae; Arabidopsis	.	.	.	.	.	.	.	.	.	GO:0048046^cellular_component^apoplast`GO:0005618^cellular_component^cell wall`GO:0009505^cellular_component^plant-type cell wall`GO:0009506^cellular_component^plasmodesma`GO:0030145^molecular_function^manganese ion binding`GO:0045735^molecular_function^nutrient reservoir activity`GO:0010497^biological_process^plasmodesmata-mediated intercellular transport`GO:2000280^biological_process^regulation…	.	.	KEGG:ath:AT3G62020
Solyc05g005070.3	1262.86	0.62	0.7	-4.30631	1.66002344270046e-05	0.000278073910883178	0.16	1381	1542	1966	961	995	832	1395.74	1523	1770.36	910.62	1138.01	839.46	gene	protein_coding	5	65837	78599	+		CRK3_ARATH	Cysteine-rich receptor-like protein kinase 3	Q:144-854	H:18-254	51.261	E:4.8e-83	Eukaryota; Viridiplantae; Streptophyta; Embryophyta; Tracheophyta; Spermatophyta; Magnoliopsida; eudicotyledons; Gunneridae; Pentapetalae; rosids; malvids; Brassicales; Brassicaceae; Camelineae; Arabidopsis	CRK3_ARATH	Cysteine-rich receptor-like protein kinase 3	Q:20-256	H:18-254	51.261	E:1.97e-83	Eukaryota; Viridiplantae; Streptophyta; Embryophyta; Tracheophyta; Spermatophyta; Magnoliopsida; eudicotyledons; Gunneridae; Pentapetalae; rosids; malvids; Brassicales; Brassicaceae; Camelineae; Arabidopsis	PF01657.18^Stress-antifung^Salt stress response/antifungal^33-130^E:9.1e-12`PF01657.18^Stress-antifung^Salt stress response/antifungal^146-240^E:9.9e-14	.	GO:0016021^cellular_component^integral component of membrane`GO:0005739^cellular_component^mitochondrion`GO:0005886^cellular_component^plasma membrane`GO:0005524^molecular_function^ATP binding`GO:0004674^molecular_function^protein serine/threonine kinase activity`GO:0046777^biological_process^protein autophosphorylation	GO:0016021^cellular_component^integral component of membrane`GO:0005739^cellular_component^mitochondrion`GO:0005886^cellular_component^plasma membrane`GO:0005524^molecular_function^ATP binding`GO:0004674^molecular_function^protein serine/threonine kinase activity`GO:0046777^biological_process^protein autophosphorylation	.	KEGG:ath:AT1G70530
Solyc09g007480.3	1362.84	1.54	-0.62	4.30452	1.67344926372012e-05	0.000279919442110106	0.14	1231	952	1153	1896	1428	1511	1244.14	940.27	1038.26	1796.6	1633.24	1524.54	gene	protein_coding	9	1040354	1042720	+	101252623	.	.	.	.	.	.	.	.	.	.	.	.	.	.	.	.	.	.	.	.
Solyc05g012070.3	1755.16	0.75	0.42	-4.30449	1.67372299613555e-05	0.000279919442110106	0.1	1868	2094	2305	1499	1306	1571	1887.94	2068.2	2075.62	1420.42	1493.71	1585.08	gene	protein_coding	5	5295289	5298819	-	543938	RGP1_SOLTU	Probable UDP-arabinopyranose mutase 1 {ECO:0000305}	Q:1214-1525	H:1-104	99.038	E:2.81e-64	Eukaryota; Viridiplantae; Streptophyta; Embryophyta; Tracheophyta; Spermatophyta; Magnoliopsida; eudicotyledons; Gunneridae; Pentapetalae; asterids; lamiids; Solanales; Solanaceae; Solanoideae; Solaneae; Solanum	RGP1_SOLTU	Probable UDP-arabinopyranose mutase 1 {ECO:0000305}	Q:1-104	H:1-104	99.038	E:5.71e-70	Eukaryota; Viridiplantae; Streptophyta; Embryophyta; Tracheophyta; Spermatophyta; Magnoliopsida; eudicotyledons; Gunneridae; Pentapetalae; asterids; lamiids; Solanales; Solanaceae; Solanoideae; Solaneae; Solanum	PF03214.14^RGP^Reversibly glycosylated polypeptide^8-104^E:2.1e-45	.	GO:0005618^cellular_component^cell wall`GO:0005576^cellular_component^extracellular region`GO:0005794^cellular_component^Golgi apparatus`GO:0009506^cellular_component^plasmodesma`GO:0052691^molecular_function^UDP-arabinopyranose mutase activity`GO:0071555^biological_process^cell wall organization`GO:0030244^biological_process^cellulose biosynthetic process`GO:0071669^biological_process^plant-type…	GO:0005618^cellular_component^cell wall`GO:0005576^cellular_component^extracellular region`GO:0005794^cellular_component^Golgi apparatus`GO:0009506^cellular_component^plasmodesma`GO:0052691^molecular_function^UDP-arabinopyranose mutase activity`GO:0071555^biological_process^cell wall organization`GO:0030244^biological_process^cellulose biosynthetic process`GO:0071669^biological_process^plant-type…	.	.
Solyc09g007080.3	1053.9	1.6	-0.68	4.30322	1.68331084547099e-05	0.000281297549773183	0.16	876	772	873	1394	1308	1063	885.35	762.49	786.12	1320.92	1496	1072.53	gene	protein_coding	9	727392	734812	+	101264664	P2C38_ARATH	Probable protein phosphatase 2C 38 {ECO:0000305}	Q:1-219	H:311-383	72.603	E:1.87e-23	Eukaryota; Viridiplantae; Streptophyta; Embryophyta; Tracheophyta; Spermatophyta; Magnoliopsida; eudicotyledons; Gunneridae; Pentapetalae; rosids; malvids; Brassicales; Brassicaceae; Camelineae; Arabidopsis	MOS11_ARATH	Protein MODIFIER OF SNC1 11	Q:78-128	H:136-185	60.784	E:1.01e-09	Eukaryota; Viridiplantae; Streptophyta; Embryophyta; Tracheophyta; Spermatophyta; Magnoliopsida; eudicotyledons; Gunneridae; Pentapetalae; rosids; malvids; Brassicales; Brassicaceae; Camelineae; Arabidopsis	.	.	GO:0005886^cellular_component^plasma membrane`GO:0004724^molecular_function^magnesium-dependent protein serine/threonine phosphatase activity`GO:0046872^molecular_function^metal ion binding`GO:0004722^molecular_function^protein serine/threonine phosphatase activity`GO:1900425^biological_process^negative regulation of defense response to bacterium	GO:0005654^cellular_component^nucleoplasm`GO:0005634^cellular_component^nucleus`GO:0003723^molecular_function^RNA binding`GO:0016973^biological_process^poly(A)+ mRNA export from nucleus	.	KEGG:ath:AT5G02770`KO:K18732
Solyc05g018760.2	338.1	1.69	-0.76	4.30102	1.70013432235159e-05	0.000283881628608978	0.18	282	238	261	492	308	451	285.01	235.07	235.03	466.21	352.27	455.04	gene	protein_coding	5	23553333	23556608	-		XERIC_ARATH	Probable E3 ubiquitin-protein ligase XERICO	Q:14-424	H:1-146	48.98	E:2.41e-37	Eukaryota; Viridiplantae; Streptophyta; Embryophyta; Tracheophyta; Spermatophyta; Magnoliopsida; eudicotyledons; Gunneridae; Pentapetalae; rosids; malvids; Brassicales; Brassicaceae; Camelineae; Arabidopsis	XERIC_ARATH	Probable E3 ubiquitin-protein ligase XERICO	Q:5-141	H:1-146	48.98	E:2.75e-39	Eukaryota; Viridiplantae; Streptophyta; Embryophyta; Tracheophyta; Spermatophyta; Magnoliopsida; eudicotyledons; Gunneridae; Pentapetalae; rosids; malvids; Brassicales; Brassicaceae; Camelineae; Arabidopsis	PF12678.8^zf-rbx1^RING-H2 zinc finger domain^89-140^E:2e-09`PF13639.7^zf-RING_2^Ring finger domain^97-140^E:2.2e-11`PF17123.6^zf-RING_11^RING-like zinc finger^97-125^E:2.3e-07`PF13923.7^zf-C3HC4_2^Zinc finger, C3HC4 type (RING finger)^97-139^E:4.1e-07`PF00097.26^zf-C3HC4^Zinc finger, C3HC4 type (RING finger)^98-139^E:9.4e-07`PF13445.7^zf-RING_UBOX^RING-type zinc-finger^98-137^E:2.9e-05	.	GO:0016021^cellular_component^integral component of membrane`GO:0046872^molecular_function^metal ion binding`GO:0016740^molecular_function^transferase activity`GO:0009688^biological_process^abscisic acid biosynthetic process`GO:0009687^biological_process^abscisic acid metabolic process`GO:0016567^biological_process^protein ubiquitination`GO:0010200^biological_process^response to chitin`GO:0009739…	GO:0016021^cellular_component^integral component of membrane`GO:0046872^molecular_function^metal ion binding`GO:0016740^molecular_function^transferase activity`GO:0009688^biological_process^abscisic acid biosynthetic process`GO:0009687^biological_process^abscisic acid metabolic process`GO:0016567^biological_process^protein ubiquitination`GO:0010200^biological_process^response to chitin`GO:0009739…	GO:0008270^molecular_function^zinc ion binding`GO:0046872^molecular_function^metal ion binding	KEGG:ath:AT2G04240`KO:K16285
Solyc01g098710.3	790.7	0.68	0.56	-4.30045	1.70448353419927e-05	0.000284153197490473	0.13	1002	932	995	740	569	558	1012.69	920.52	895.98	701.21	650.78	563	gene	protein_coding	1	89006604	89013175	-	101258996	.	.	.	.	.	.	.	.	.	.	.	.	.	.	.	.	.	.	.	.
Solyc03g116150.3	1756.35	1.47	-0.55	4.30062	1.70320214372338e-05	0.000284153197490473	0.13	1449	1374	1607	2319	1998	1771	1464.47	1357.07	1447.08	2197.43	2285.17	1786.87	gene	protein_coding	3	67126066	67135313	+		PMT2_ARATH	Probable methyltransferase PMT2	Q:2-220	H:543-615	68.493	E:4.88e-24	Eukaryota; Viridiplantae; Streptophyta; Embryophyta; Tracheophyta; Spermatophyta; Magnoliopsida; eudicotyledons; Gunneridae; Pentapetalae; rosids; malvids; Brassicales; Brassicaceae; Camelineae; Arabidopsis	PKS3_ARATH	Protein PHYTOCHROME KINASE SUBSTRATE 3	Q:122-447	H:45-359	33.242	E:6.35e-28	Eukaryota; Viridiplantae; Streptophyta; Embryophyta; Tracheophyta; Spermatophyta; Magnoliopsida; eudicotyledons; Gunneridae; Pentapetalae; rosids; malvids; Brassicales; Brassicaceae; Camelineae; Arabidopsis	.	.	GO:0005737^cellular_component^cytoplasm`GO:0005768^cellular_component^endosome`GO:0005794^cellular_component^Golgi apparatus`GO:0005797^cellular_component^Golgi medial cisterna`GO:0000139^cellular_component^Golgi membrane`GO:0016021^cellular_component^integral component of membrane`GO:0005634^cellular_component^nucleus`GO:0005802^cellular_component^trans-Golgi network`GO:0008168^molecular_functio…	GO:0009506^cellular_component^plasmodesma`GO:0009638^biological_process^phototropism`GO:0009585^biological_process^red, far-red light phototransduction	.	KEGG:ath:AT1G18810
Solyc03g082520.1	376.6	0.32	1.63	-4.29922	1.71400356768301e-05	0.000285512230364563	0.38	521	534	726	91	266	160	526.56	527.42	653.75	86.23	304.23	161.43	gene	protein_coding	3	53884510	53884863	-		SAU32_ARATH	Auxin-responsive protein SAUR32 {ECO:0000305}	Q:100-309	H:24-93	47.143	E:2.09e-21	Eukaryota; Viridiplantae; Streptophyta; Embryophyta; Tracheophyta; Spermatophyta; Magnoliopsida; eudicotyledons; Gunneridae; Pentapetalae; rosids; malvids; Brassicales; Brassicaceae; Camelineae; Arabidopsis	SAU32_ARATH	Auxin-responsive protein SAUR32 {ECO:0000305}	Q:19-117	H:10-121	39.823	E:6.58e-24	Eukaryota; Viridiplantae; Streptophyta; Embryophyta; Tracheophyta; Spermatophyta; Magnoliopsida; eudicotyledons; Gunneridae; Pentapetalae; rosids; malvids; Brassicales; Brassicaceae; Camelineae; Arabidopsis	PF02519.15^Auxin_inducible^Auxin responsive protein^32-99^E:1.6e-18	.	GO:0005737^cellular_component^cytoplasm`GO:0005634^cellular_component^nucleus`GO:0009734^biological_process^auxin-activated signaling pathway`GO:0007275^biological_process^multicellular organism development`GO:0040008^biological_process^regulation of growth`GO:1900140^biological_process^regulation of seedling development	GO:0005737^cellular_component^cytoplasm`GO:0005634^cellular_component^nucleus`GO:0009734^biological_process^auxin-activated signaling pathway`GO:0007275^biological_process^multicellular organism development`GO:0040008^biological_process^regulation of growth`GO:1900140^biological_process^regulation of seedling development	GO:0009733^biological_process^response to auxin	KEGG:ath:AT2G46690`KO:K14488
Solyc05g012900.3	789.73	0.44	1.17	-4.29793	1.72397456178078e-05	0.000286944155131486	0.27	686	1108	1659	545	472	397	693.32	1094.35	1493.91	516.43	539.84	400.56	gene	protein_coding	5	6033016	6038448	+		R1A_SOLDE	Late blight resistance protein R1-A	Q:1127-3430	H:117-885	43.836	E:3.84e-179	Eukaryota; Viridiplantae; Streptophyta; Embryophyta; Tracheophyta; Spermatophyta; Magnoliopsida; eudicotyledons; Gunneridae; Pentapetalae; asterids; lamiids; Solanales; Solanaceae; Solanoideae; Solaneae; Solanum	R1B12_SOLDE	Putative late blight resistance protein homolog R1B-12	Q:261-1038	H:129-907	43.05	E:0	Eukaryota; Viridiplantae; Streptophyta; Embryophyta; Tracheophyta; Spermatophyta; Magnoliopsida; eudicotyledons; Gunneridae; Pentapetalae; asterids; lamiids; Solanales; Solanaceae; Solanoideae; Solaneae; Solanum	PF12061.9^NB-LRR^Late blight resistance protein R1^267-544^E:1.6e-92`PF00931.23^NB-ARC^NB-ARC domain^703-948^E:5.1e-61	.	GO:0005737^cellular_component^cytoplasm`GO:0016020^cellular_component^membrane`GO:0043531^molecular_function^ADP binding`GO:0005524^molecular_function^ATP binding`GO:0009626^biological_process^plant-type hypersensitive response	GO:0005737^cellular_component^cytoplasm`GO:0016020^cellular_component^membrane`GO:0043531^molecular_function^ADP binding`GO:0005524^molecular_function^ATP binding`GO:0009626^biological_process^plant-type hypersensitive response	GO:0043531^molecular_function^ADP binding	.
Solyc06g034370.1	81.91	0.27	1.87	-4.29716	1.72998637607519e-05	0.000287486271030584	0.43	123	173	100	27	52	21	124.31	170.87	90.05	25.58	59.47	21.19	gene	protein_coding	6	24270678	24271256	-	101247130	21KD_DAUCA	21 kDa protein	Q:85-576	H:28-191	57.317	E:1.3e-70	Eukaryota; Viridiplantae; Streptophyta; Embryophyta; Tracheophyta; Spermatophyta; Magnoliopsida; eudicotyledons; Gunneridae; Pentapetalae; asterids; campanulids; Apiales; Apiaceae; Apioideae; Scandiceae; Daucinae; Daucus; Daucus sect. Daucus	21KD_DAUCA	21 kDa protein	Q:29-192	H:28-191	57.317	E:1.28e-70	Eukaryota; Viridiplantae; Streptophyta; Embryophyta; Tracheophyta; Spermatophyta; Magnoliopsida; eudicotyledons; Gunneridae; Pentapetalae; asterids; campanulids; Apiales; Apiaceae; Apioideae; Scandiceae; Daucinae; Daucus; Daucus sect. Daucus	PF04043.16^PMEI^Plant invertase/pectin methylesterase inhibitor^28-184^E:6e-40	.	GO:0004857^molecular_function^enzyme inhibitor activity	GO:0004857^molecular_function^enzyme inhibitor activity	GO:0004857^molecular_function^enzyme inhibitor activity	.
Solyc06g071810.1	7346.68	0.41	1.3	-4.29723	1.72943514493183e-05	0.000287486271030584	0.3	9625	10174	12857	3708	5800	2556	9727.73	10048.6	11577.6	3513.61	6633.62	2578.91	gene	protein_coding	6	44375481	44377358	+	101259548	SBIR1_ARATH	Leucine-rich repeat receptor-like serine/threonine/tyrosine-protein kinase SOBIR1	Q:67-1875	H:35-641	59.869	E:0	Eukaryota; Viridiplantae; Streptophyta; Embryophyta; Tracheophyta; Spermatophyta; Magnoliopsida; eudicotyledons; Gunneridae; Pentapetalae; rosids; malvids; Brassicales; Brassicaceae; Camelineae; Arabidopsis	SBIR1_ARATH	Leucine-rich repeat receptor-like serine/threonine/tyrosine-protein kinase SOBIR1	Q:8-625	H:22-641	59.936	E:0	Eukaryota; Viridiplantae; Streptophyta; Embryophyta; Tracheophyta; Spermatophyta; Magnoliopsida; eudicotyledons; Gunneridae; Pentapetalae; rosids; malvids; Brassicales; Brassicaceae; Camelineae; Arabidopsis	PF13516.7^LRR_6^Leucine Rich repeat^92-104^E:16`PF00560.34^LRR_1^Leucine Rich Repeat^93-108^E:58`PF13516.7^LRR_6^Leucine Rich repeat^114-129^E:140`PF00560.34^LRR_1^Leucine Rich Repeat^116-138^E:54`PF13516.7^LRR_6^Leucine Rich repeat^139-152^E:350`PF00560.34^LRR_1^Leucine Rich Repeat^140-152^E:2400`PF12799.8^LRR_4^Leucine Rich repeats (2 copies)^162-199^E:2.9e-06`PF13516.7^LRR_6^Leucine Rich repea…	.	GO:0016021^cellular_component^integral component of membrane`GO:0005777^cellular_component^peroxisome`GO:0005886^cellular_component^plasma membrane`GO:0005524^molecular_function^ATP binding`GO:0004674^molecular_function^protein serine/threonine kinase activity`GO:0004713^molecular_function^protein tyrosine kinase activity`GO:0004714^molecular_function^transmembrane receptor protein tyrosine kinas…	GO:0016021^cellular_component^integral component of membrane`GO:0005777^cellular_component^peroxisome`GO:0005886^cellular_component^plasma membrane`GO:0005524^molecular_function^ATP binding`GO:0004674^molecular_function^protein serine/threonine kinase activity`GO:0004713^molecular_function^protein tyrosine kinase activity`GO:0004714^molecular_function^transmembrane receptor protein tyrosine kinas…	GO:0005515^molecular_function^protein binding`GO:0004672^molecular_function^protein kinase activity`GO:0005524^molecular_function^ATP binding`GO:0006468^biological_process^protein phosphorylation	KEGG:ath:AT2G31880
Solyc05g009120.3	397.71	0.27	1.86	-4.29653	1.73492514401191e-05	0.000287683238088615	0.43	329	599	1052	94	232	159	332.51	591.62	947.31	89.07	265.34	160.42	gene	protein_coding	5	3244790	3248102	-		BC10_ORYSJ	Glycosyltransferase BC10 {ECO:0000305}	Q:1-609	H:146-386	33.607	E:2.91e-34	Eukaryota; Viridiplantae; Streptophyta; Embryophyta; Tracheophyta; Spermatophyta; Magnoliopsida; Liliopsida; Poales; Poaceae; BOP clade; Oryzoideae; Oryzeae; Oryzinae; Oryza; Oryza sativa	BC10_ORYSJ	Glycosyltransferase BC10 {ECO:0000305}	Q:1-203	H:146-386	33.607	E:2.24e-34	Eukaryota; Viridiplantae; Streptophyta; Embryophyta; Tracheophyta; Spermatophyta; Magnoliopsida; Liliopsida; Poales; Poaceae; BOP clade; Oryzoideae; Oryzeae; Oryzinae; Oryza; Oryza sativa	PF02485.22^Branch^Core-2/I-Branching enzyme^2-171^E:5.8e-62	.	GO:0000139^cellular_component^Golgi membrane`GO:0016021^cellular_component^integral component of membrane`GO:0016757^molecular_function^transferase activity, transferring glycosyl groups`GO:0030244^biological_process^cellulose biosynthetic process`GO:0009664^biological_process^plant-type cell wall organization	GO:0000139^cellular_component^Golgi membrane`GO:0016021^cellular_component^integral component of membrane`GO:0016757^molecular_function^transferase activity, transferring glycosyl groups`GO:0030244^biological_process^cellulose biosynthetic process`GO:0009664^biological_process^plant-type cell wall organization	GO:0008375^molecular_function^acetylglucosaminyltransferase activity`GO:0016020^cellular_component^membrane	KEGG:osa:4337935
Solyc05g054250.1	283.43	0.08	3.65	-4.29648	1.73530661533905e-05	0.000287683238088615	0.85	403	498	750	27	79	10	407.3	491.86	675.36	25.58	90.35	10.09	gene	protein_coding	5	65057245	65058207	-	104647562	HIP33_ARATH	Heavy metal-associated isoprenylated plant protein 33 {ECO:0000303|PubMed:21072340, ECO:0000303|PubMed:23368984}	Q:28-210	H:14-74	50.82	E:4.87e-11	Eukaryota; Viridiplantae; Streptophyta; Embryophyta; Tracheophyta; Spermatophyta; Magnoliopsida; eudicotyledons; Gunneridae; Pentapetalae; rosids; malvids; Brassicales; Brassicaceae; Camelineae; Arabidopsis	HIP33_ARATH	Heavy metal-associated isoprenylated plant protein 33 {ECO:0000303|PubMed:21072340, ECO:0000303|PubMed:23368984}	Q:9-70	H:13-74	50	E:2.28e-11	Eukaryota; Viridiplantae; Streptophyta; Embryophyta; Tracheophyta; Spermatophyta; Magnoliopsida; eudicotyledons; Gunneridae; Pentapetalae; rosids; malvids; Brassicales; Brassicaceae; Camelineae; Arabidopsis	PF00403.27^HMA^Heavy-metal-associated domain^13-65^E:3.5e-08	.	GO:0009506^cellular_component^plasmodesma`GO:0046872^molecular_function^metal ion binding`GO:0030001^biological_process^metal ion transport	GO:0009506^cellular_component^plasmodesma`GO:0046872^molecular_function^metal ion binding`GO:0030001^biological_process^metal ion transport	GO:0046872^molecular_function^metal ion binding`GO:0030001^biological_process^metal ion transport	KEGG:ath:AT5G19090
Solyc02g032950.3	1564.22	0.34	1.56	-4.29672	1.7334446318139e-05	0.000287683238088615	0.36	1669	2168	3528	637	1130	480	1686.81	2141.29	3176.92	603.61	1292.41	484.3	gene	protein_coding	2	29971480	29973794	-		WRKY6_ARATH	WRKY transcription factor 6 {ECO:0000303|PubMed:11722756}	Q:1-429	H:349-498	60.927	E:1.12e-22	Eukaryota; Viridiplantae; Streptophyta; Embryophyta; Tracheophyta; Spermatophyta; Magnoliopsida; eudicotyledons; Gunneridae; Pentapetalae; rosids; malvids; Brassicales; Brassicaceae; Camelineae; Arabidopsis	WRKY6_ARATH	WRKY transcription factor 6 {ECO:0000303|PubMed:11722756}	Q:1-192	H:349-540	57.82	E:5.52e-49	Eukaryota; Viridiplantae; Streptophyta; Embryophyta; Tracheophyta; Spermatophyta; Magnoliopsida; eudicotyledons; Gunneridae; Pentapetalae; rosids; malvids; Brassicales; Brassicaceae; Camelineae; Arabidopsis	.	.	GO:0005634^cellular_component^nucleus`GO:0003700^molecular_function^DNA-binding transcription factor activity`GO:0043565^molecular_function^sequence-specific DNA binding`GO:0080169^biological_process^cellular response to boron-containing substance deprivation`GO:0016036^biological_process^cellular response to phosphate starvation`GO:0009873^biological_process^ethylene-activated signaling pathway`…	GO:0005634^cellular_component^nucleus`GO:0003700^molecular_function^DNA-binding transcription factor activity`GO:0043565^molecular_function^sequence-specific DNA binding`GO:0080169^biological_process^cellular response to boron-containing substance deprivation`GO:0016036^biological_process^cellular response to phosphate starvation`GO:0009873^biological_process^ethylene-activated signaling pathway`…	.	KEGG:ath:AT1G62300
Solyc06g062990.2	926.93	0.69	0.54	-4.29578	1.74076732654265e-05	0.000288359489203161	0.13	1009	1057	1368	813	691	699	1019.77	1043.98	1231.87	770.38	790.32	705.26	gene	protein_coding	6	39872237	39874274	-		E70B1_ARATH	Exocyst complex component EXO70B1 {ECO:0000303|PubMed:23944713}	Q:199-1242	H:121-453	37.394	E:2.23e-67	Eukaryota; Viridiplantae; Streptophyta; Embryophyta; Tracheophyta; Spermatophyta; Magnoliopsida; eudicotyledons; Gunneridae; Pentapetalae; rosids; malvids; Brassicales; Brassicaceae; Camelineae; Arabidopsis	E70B1_ARATH	Exocyst complex component EXO70B1 {ECO:0000303|PubMed:23944713}	Q:67-414	H:121-453	37.394	E:2.01e-67	Eukaryota; Viridiplantae; Streptophyta; Embryophyta; Tracheophyta; Spermatophyta; Magnoliopsida; eudicotyledons; Gunneridae; Pentapetalae; rosids; malvids; Brassicales; Brassicaceae; Camelineae; Arabidopsis	PF03081.16^Exo70^Exo70 exocyst complex subunit^210-414^E:2.9e-54	.	GO:0005829^cellular_component^cytosol`GO:0012505^cellular_component^endomembrane system`GO:0000145^cellular_component^exocyst`GO:0070062^cellular_component^extracellular exosome`GO:0045335^cellular_component^phagocytic vesicle`GO:0005886^cellular_component^plasma membrane`GO:0006952^biological_process^defense response`GO:0052542^biological_process^defense response by callose deposition`GO:0042742…	GO:0005829^cellular_component^cytosol`GO:0012505^cellular_component^endomembrane system`GO:0000145^cellular_component^exocyst`GO:0070062^cellular_component^extracellular exosome`GO:0045335^cellular_component^phagocytic vesicle`GO:0005886^cellular_component^plasma membrane`GO:0006952^biological_process^defense response`GO:0052542^biological_process^defense response by callose deposition`GO:0042742…	GO:0006887^biological_process^exocytosis`GO:0000145^cellular_component^exocyst	KEGG:ath:AT5G58430
Solyc01g088440.2	163.11	0.51	0.98	-4.29538	1.74394806164744e-05	0.000288657287412413	0.23	192	221	262	87	118	112	194.05	218.28	235.93	82.44	134.96	113	gene	protein_coding	1	83116604	83117253	-	101268225	ATL8_ARATH	RING-H2 finger protein ATL8	Q:36-332	H:59-147	38.384	E:8.23e-13	Eukaryota; Viridiplantae; Streptophyta; Embryophyta; Tracheophyta; Spermatophyta; Magnoliopsida; eudicotyledons; Gunneridae; Pentapetalae; rosids; malvids; Brassicales; Brassicaceae; Camelineae; Arabidopsis	ATL61_ARATH	Putative RING-H2 finger protein ATL61	Q:51-111	H:88-152	46.154	E:3.75e-13	Eukaryota; Viridiplantae; Streptophyta; Embryophyta; Tracheophyta; Spermatophyta; Magnoliopsida; eudicotyledons; Gunneridae; Pentapetalae; rosids; malvids; Brassicales; Brassicaceae; Camelineae; Arabidopsis	PF13639.7^zf-RING_2^Ring finger domain^50-93^E:3.4e-11`PF13923.7^zf-C3HC4_2^Zinc finger, C3HC4 type (RING finger)^50-92^E:3.2e-08`PF12861.8^zf-ANAPC11^Anaphase-promoting complex subunit 11 RING-H2 finger^50-96^E:3.5e-05`PF17123.6^zf-RING_11^RING-like zinc finger^51-79^E:1.8e-08`PF00097.26^zf-C3HC4^Zinc finger, C3HC4 type (RING finger)^51-92^E:2.6e-06`PF13445.7^zf-RING_UBOX^RING-type zinc-finger^5…	.	GO:0016021^cellular_component^integral component of membrane`GO:0046872^molecular_function^metal ion binding`GO:0016740^molecular_function^transferase activity`GO:0016567^biological_process^protein ubiquitination	GO:0016021^cellular_component^integral component of membrane`GO:0046872^molecular_function^metal ion binding`GO:0016740^molecular_function^transferase activity`GO:0016567^biological_process^protein ubiquitination	GO:0004842^molecular_function^ubiquitin-protein transferase activity`GO:0005680^cellular_component^anaphase-promoting complex`GO:0046872^molecular_function^metal ion binding	KEGG:ath:AT3G14320
Solyc04g082740.3	352.05	1.44	-0.53	4.29279	1.76444900689649e-05	0.000291669259637287	0.12	273	294	331	422	371	420	275.91	290.38	298.06	399.88	424.32	423.76	gene	protein_coding	4	66393766	66395430	-		IDM3_ARATH	Increased DNA methylation 3 {ECO:0000303|PubMed:25684209}	Q:28-357	H:294-381	33.636	E:6.87e-09	Eukaryota; Viridiplantae; Streptophyta; Embryophyta; Tracheophyta; Spermatophyta; Magnoliopsida; eudicotyledons; Gunneridae; Pentapetalae; rosids; malvids; Brassicales; Brassicaceae; Camelineae; Arabidopsis	IDM3_ARATH	Increased DNA methylation 3 {ECO:0000303|PubMed:25684209}	Q:10-119	H:294-381	33.636	E:6.18e-09	Eukaryota; Viridiplantae; Streptophyta; Embryophyta; Tracheophyta; Spermatophyta; Magnoliopsida; eudicotyledons; Gunneridae; Pentapetalae; rosids; malvids; Brassicales; Brassicaceae; Camelineae; Arabidopsis	.	.	GO:0005634^cellular_component^nucleus`GO:1901537^biological_process^positive regulation of DNA demethylation	GO:0005634^cellular_component^nucleus`GO:1901537^biological_process^positive regulation of DNA demethylation	.	KEGG:ath:AT1G20870
Solyc10g074930.1	4362.61	1.46	-0.55	4.29272	1.76493999100179e-05	0.000291669259637287	0.13	3698	3837	3445	5273	4230	5661	3737.47	3789.72	3102.18	4996.56	4837.97	5711.73	gene	protein_coding	10	58698608	58701563	-	101261471	KPK2_ARATH	Serine/threonine-protein kinase AtPK2/AtPK19	Q:1-642	H:1-208	55.405	E:7.77e-73	Eukaryota; Viridiplantae; Streptophyta; Embryophyta; Tracheophyta; Spermatophyta; Magnoliopsida; eudicotyledons; Gunneridae; Pentapetalae; rosids; malvids; Brassicales; Brassicaceae; Camelineae; Arabidopsis	KPK2_ARATH	Serine/threonine-protein kinase AtPK2/AtPK19	Q:1-214	H:1-208	55.405	E:6.99e-73	Eukaryota; Viridiplantae; Streptophyta; Embryophyta; Tracheophyta; Spermatophyta; Magnoliopsida; eudicotyledons; Gunneridae; Pentapetalae; rosids; malvids; Brassicales; Brassicaceae; Camelineae; Arabidopsis	PF00069.26^Pkinase^Protein kinase domain^146-214^E:4.2e-13`PF07714.18^PK_Tyr_Ser-Thr^Protein tyrosine and serine/threonine kinase^147-209^E:1.8e-05	.	GO:0005634^cellular_component^nucleus`GO:0005524^molecular_function^ATP binding`GO:0016301^molecular_function^kinase activity`GO:0004672^molecular_function^protein kinase activity`GO:0004674^molecular_function^protein serine/threonine kinase activity`GO:0071456^biological_process^cellular response to hypoxia`GO:0045727^biological_process^positive regulation of translation`GO:0006468^biological_pr…	GO:0005634^cellular_component^nucleus`GO:0005524^molecular_function^ATP binding`GO:0016301^molecular_function^kinase activity`GO:0004672^molecular_function^protein kinase activity`GO:0004674^molecular_function^protein serine/threonine kinase activity`GO:0071456^biological_process^cellular response to hypoxia`GO:0045727^biological_process^positive regulation of translation`GO:0006468^biological_pr…	GO:0004672^molecular_function^protein kinase activity`GO:0005524^molecular_function^ATP binding`GO:0006468^biological_process^protein phosphorylation	KEGG:ath:AT3G08720`KO:K04688
Solyc06g076080.2	1569.26	0.17	2.58	-4.29207	1.77013194491632e-05	0.000292295838245992	0.6	2184	2462	3808	278	730	247	2207.31	2431.66	3429.05	263.43	834.92	249.21	gene	protein_coding	6	47376773	47379915	-		.	.	.	.	.	.	.	.	.	.	.	.	.	.	.	.	.	.	.	.
Solyc09g092670.3	3192.45	1.36	-0.44	4.28985	1.78793927257897e-05	0.000295002913021884	0.1	2532	2753	3160	3996	3393	3334	2559.02	2719.08	2845.54	3786.51	3880.67	3363.88	gene	protein_coding	9	72122447	72124714	+	101255244	C71BY_ARATH	Cytochrome P450 71B37	Q:1-606	H:297-498	54.95	E:1.06e-73	Eukaryota; Viridiplantae; Streptophyta; Embryophyta; Tracheophyta; Spermatophyta; Magnoliopsida; eudicotyledons; Gunneridae; Pentapetalae; rosids; malvids; Brassicales; Brassicaceae; Camelineae; Arabidopsis	C71BY_ARATH	Cytochrome P450 71B37	Q:1-202	H:297-498	54.95	E:9.05e-77	Eukaryota; Viridiplantae; Streptophyta; Embryophyta; Tracheophyta; Spermatophyta; Magnoliopsida; eudicotyledons; Gunneridae; Pentapetalae; rosids; malvids; Brassicales; Brassicaceae; Camelineae; Arabidopsis	PF00067.23^p450^Cytochrome P450^2-193^E:2.6e-61	.	GO:0016021^cellular_component^integral component of membrane`GO:0016020^cellular_component^membrane`GO:0020037^molecular_function^heme binding`GO:0005506^molecular_function^iron ion binding`GO:0016709^molecular_function^oxidoreductase activity, acting on paired donors, with incorporation or reduction of molecular oxygen, NAD(P)H as one donor, and incorporation of one atom of oxygen	GO:0016021^cellular_component^integral component of membrane`GO:0016020^cellular_component^membrane`GO:0020037^molecular_function^heme binding`GO:0005506^molecular_function^iron ion binding`GO:0016709^molecular_function^oxidoreductase activity, acting on paired donors, with incorporation or reduction of molecular oxygen, NAD(P)H as one donor, and incorporation of one atom of oxygen	GO:0005506^molecular_function^iron ion binding`GO:0016705^molecular_function^oxidoreductase activity, acting on paired donors, with incorporation or reduction of molecular oxygen`GO:0020037^molecular_function^heme binding`GO:0055114^biological_process^oxidation-reduction process	KEGG:ath:AT3G26330
Solyc06g005070.2	294.15	1.91	-0.93	4.2875	1.80697866488975e-05	0.000297908836442171	0.22	234	183	210	372	426	316	236.5	180.75	189.1	352.5	487.23	318.83	gene	protein_coding	6	54144	58359	+		PTR18_ARATH	Protein NRT1/ PTR FAMILY 3.1	Q:2-904	H:295-595	51.645	E:4.73e-105	Eukaryota; Viridiplantae; Streptophyta; Embryophyta; Tracheophyta; Spermatophyta; Magnoliopsida; eudicotyledons; Gunneridae; Pentapetalae; rosids; malvids; Brassicales; Brassicaceae; Camelineae; Arabidopsis	PTR18_ARATH	Protein NRT1/ PTR FAMILY 3.1	Q:1-301	H:295-595	51.645	E:8.28e-106	Eukaryota; Viridiplantae; Streptophyta; Embryophyta; Tracheophyta; Spermatophyta; Magnoliopsida; eudicotyledons; Gunneridae; Pentapetalae; rosids; malvids; Brassicales; Brassicaceae; Camelineae; Arabidopsis	PF00854.22^PTR2^POT family^20-233^E:6.6e-45	.	GO:0016021^cellular_component^integral component of membrane`GO:0097708^cellular_component^intracellular vesicle`GO:0005886^cellular_component^plasma membrane`GO:0035673^molecular_function^oligopeptide transmembrane transporter activity`GO:1904680^molecular_function^peptide transmembrane transporter activity`GO:0015333^molecular_function^peptide:proton symporter activity`GO:0010336^biological_pro…	GO:0016021^cellular_component^integral component of membrane`GO:0097708^cellular_component^intracellular vesicle`GO:0005886^cellular_component^plasma membrane`GO:0035673^molecular_function^oligopeptide transmembrane transporter activity`GO:1904680^molecular_function^peptide transmembrane transporter activity`GO:0015333^molecular_function^peptide:proton symporter activity`GO:0010336^biological_pro…	GO:0022857^molecular_function^transmembrane transporter activity`GO:0055085^biological_process^transmembrane transport`GO:0016020^cellular_component^membrane	KEGG:ath:AT1G68570
Solyc08g013670.3	89668.8	1.24	-0.31	4.28702	1.81086031464462e-05	0.000298313153017068	0.07	80449	81057	87651	104422	90390	94542	81307.6	80058.2	78928.6	98947.7	103382	95389.3	gene	protein_coding	8	3142446	3143601	-	101268297	PSAN_ARATH	Photosystem I reaction center subunit N, chloroplastic	Q:79-354	H:1-100	46	E:3.03e-09	Eukaryota; Viridiplantae; Streptophyta; Embryophyta; Tracheophyta; Spermatophyta; Magnoliopsida; eudicotyledons; Gunneridae; Pentapetalae; rosids; malvids; Brassicales; Brassicaceae; Camelineae; Arabidopsis	.	.	.	.	.	.	.	.	.	GO:0030093^cellular_component^chloroplast photosystem I`GO:0019904^molecular_function^protein domain specific binding`GO:0015979^biological_process^photosynthesis	.	.	KEGG:ath:AT5G64040`KO:K02701
Solyc02g071285.1	634.4	1.45	-0.54	4.28578	1.82096598757785e-05	0.000299741341425275	0.13	499	587	520	811	654	731	504.33	579.77	468.25	768.48	748	737.55	gene	protein_coding	2	41349200	41352965	+		RL321_ARATH	60S ribosomal protein L32-1	Q:310-693	H:32-133	66.406	E:2.69e-52	Eukaryota; Viridiplantae; Streptophyta; Embryophyta; Tracheophyta; Spermatophyta; Magnoliopsida; eudicotyledons; Gunneridae; Pentapetalae; rosids; malvids; Brassicales; Brassicaceae; Camelineae; Arabidopsis	PSD_CLOP1	Phosphatidylserine decarboxylase proenzyme {ECO:0000255|HAMAP-Rule:MF_00663}	Q:34-69	H:23-58	38.889	E:1.3	Bacteria; Firmicutes; Clostridia; Clostridiales; Clostridiaceae; Clostridium	.	COG0688^Phosphatidylserine decarboxylase	GO:0005829^cellular_component^cytosol`GO:0022625^cellular_component^cytosolic large ribosomal subunit`GO:0022626^cellular_component^cytosolic ribosome`GO:0005730^cellular_component^nucleolus`GO:0042788^cellular_component^polysomal ribosome`GO:0003735^molecular_function^structural constituent of ribosome`GO:0006412^biological_process^translation	GO:0005886^cellular_component^plasma membrane`GO:0004609^molecular_function^phosphatidylserine decarboxylase activity`GO:0006646^biological_process^phosphatidylethanolamine biosynthetic process	.	KEGG:cpf:CPF_0033`KO:K01613
Solyc05g052630.3	9491.75	1.34	-0.42	4.28384	1.83698878550663e-05	0.000302140503791129	0.1	8304	8098	8820	12171	9831	9753	8392.63	7998.22	7942.29	11532.9	11244	9840.41	gene	protein_coding	5	63695445	63701068	-		REV1_PONAB	DNA repair protein REV1	Q:941-834	H:975-1010	50	E:2.4	Eukaryota; Metazoa; Chordata; Craniata; Vertebrata; Euteleostomi; Mammalia; Eutheria; Euarchontoglires; Primates; Haplorrhini; Catarrhini; Hominidae; Pongo	ATM_PIG	Serine-protein kinase ATM	Q:39-82	H:848-890	34.091	E:3.8	Eukaryota; Metazoa; Chordata; Craniata; Vertebrata; Euteleostomi; Mammalia; Eutheria; Laurasiatheria; Artiodactyla; Suina; Suidae; Sus	.	.	GO:0005634^cellular_component^nucleus`GO:0003684^molecular_function^damaged DNA binding`GO:0046872^molecular_function^metal ion binding`GO:0016779^molecular_function^nucleotidyltransferase activity`GO:0042276^biological_process^error-prone translesion synthesis	GO:0031410^cellular_component^cytoplasmic vesicle`GO:0005634^cellular_component^nucleus`GO:0005840^cellular_component^ribosome`GO:0016303^molecular_function^1-phosphatidylinositol-3-kinase activity`GO:0005524^molecular_function^ATP binding`GO:0003677^molecular_function^DNA binding`GO:0047485^molecular_function^protein N-terminus binding`GO:0004674^molecular_function^protein serine/threonine kinas…	.	KEGG:ssc:100101922`KO:K04728
Solyc06g009040.3	10241.6	0.74	0.44	-4.28175	1.85432072403019e-05	0.0003047510405666	0.1	10905	12171	13655	9369	8100	7898	11021.4	12021	12296.1	8877.83	9264.19	7968.78	gene	protein_coding	6	2964329	2976278	+		GSTF_HYOMU	Glutathione S-transferase	Q:3-431	H:67-209	82.517	E:2.09e-84	Eukaryota; Viridiplantae; Streptophyta; Embryophyta; Tracheophyta; Spermatophyta; Magnoliopsida; eudicotyledons; Gunneridae; Pentapetalae; asterids; lamiids; Solanales; Solanaceae; Solanoideae; Hyoscyameae; Hyoscyamus	GSTF_HYOMU	Glutathione S-transferase	Q:1-143	H:67-209	82.517	E:5.56e-86	Eukaryota; Viridiplantae; Streptophyta; Embryophyta; Tracheophyta; Spermatophyta; Magnoliopsida; eudicotyledons; Gunneridae; Pentapetalae; asterids; lamiids; Solanales; Solanaceae; Solanoideae; Hyoscyameae; Hyoscyamus	PF00043.26^GST_C^Glutathione S-transferase, C-terminal domain^45-136^E:1.6e-16`PF13410.7^GST_C_2^Glutathione S-transferase, C-terminal domain^64-130^E:2.7e-09`PF14497.7^GST_C_3^Glutathione S-transferase, C-terminal domain^70-137^E:6.9e-07	.	GO:0004364^molecular_function^glutathione transferase activity`GO:0009734^biological_process^auxin-activated signaling pathway	GO:0004364^molecular_function^glutathione transferase activity`GO:0009734^biological_process^auxin-activated signaling pathway	.	.
Solyc02g080050.2	13701.4	0.53	0.91	-4.27946	1.87344260502521e-05	0.000307651408749694	0.21	14061	17172	24983	9933	10053	7562	14211.1	16960.4	22496.9	9412.27	11497.9	7629.77	gene	protein_coding	2	44908346	44957593	-		CRK41_ARATH	Cysteine-rich receptor-like protein kinase 41	Q:1-264	H:563-646	50	E:2.09e-11	Eukaryota; Viridiplantae; Streptophyta; Embryophyta; Tracheophyta; Spermatophyta; Magnoliopsida; eudicotyledons; Gunneridae; Pentapetalae; rosids; malvids; Brassicales; Brassicaceae; Camelineae; Arabidopsis	CRK41_ARATH	Cysteine-rich receptor-like protein kinase 41	Q:1-88	H:563-646	50	E:4.74e-23	Eukaryota; Viridiplantae; Streptophyta; Embryophyta; Tracheophyta; Spermatophyta; Magnoliopsida; eudicotyledons; Gunneridae; Pentapetalae; rosids; malvids; Brassicales; Brassicaceae; Camelineae; Arabidopsis	.	.	GO:0016021^cellular_component^integral component of membrane`GO:0005886^cellular_component^plasma membrane`GO:0005524^molecular_function^ATP binding`GO:0004674^molecular_function^protein serine/threonine kinase activity`GO:0006468^biological_process^protein phosphorylation	GO:0016021^cellular_component^integral component of membrane`GO:0005886^cellular_component^plasma membrane`GO:0005524^molecular_function^ATP binding`GO:0004674^molecular_function^protein serine/threonine kinase activity`GO:0006468^biological_process^protein phosphorylation	.	KEGG:ath:AT4G00970
Solyc10g079480.1	887.03	1.32	-0.4	4.27754	1.88971976936063e-05	0.000310080432595088	0.09	772	759	852	1045	912	983	780.24	749.65	767.21	990.22	1043.08	991.81	gene	protein_coding	10	61153318	61154820	+	101267662	LCYB_TOBAC	Lycopene beta cyclase, chloroplastic	Q:1-1500	H:1-500	90.4	E:0	Eukaryota; Viridiplantae; Streptophyta; Embryophyta; Tracheophyta; Spermatophyta; Magnoliopsida; eudicotyledons; Gunneridae; Pentapetalae; asterids; lamiids; Solanales; Solanaceae; Nicotianoideae; Nicotianeae; Nicotiana	LCYB_TOBAC	Lycopene beta cyclase, chloroplastic	Q:1-500	H:1-500	90.4	E:0	Eukaryota; Viridiplantae; Streptophyta; Embryophyta; Tracheophyta; Spermatophyta; Magnoliopsida; eudicotyledons; Gunneridae; Pentapetalae; asterids; lamiids; Solanales; Solanaceae; Nicotianoideae; Nicotianeae; Nicotiana	PF05834.13^Lycopene_cycl^Lycopene cyclase protein^85-477^E:2.5e-146	.	GO:0009507^cellular_component^chloroplast`GO:0045436^molecular_function^lycopene beta cyclase activity`GO:0016491^molecular_function^oxidoreductase activity`GO:0016705^molecular_function^oxidoreductase activity, acting on paired donors, with incorporation or reduction of molecular oxygen`GO:0016120^biological_process^carotene biosynthetic process`GO:0006744^biological_process^ubiquinone biosynthe…	GO:0009507^cellular_component^chloroplast`GO:0045436^molecular_function^lycopene beta cyclase activity`GO:0016491^molecular_function^oxidoreductase activity`GO:0016705^molecular_function^oxidoreductase activity, acting on paired donors, with incorporation or reduction of molecular oxygen`GO:0016120^biological_process^carotene biosynthetic process`GO:0006744^biological_process^ubiquinone biosynthe…	.	KEGG:ag:CAA57386`KEGG:nta:107763207`KO:K06443
Solyc05g054700.3	1634.38	1.29	-0.37	4.27414	1.91879018678087e-05	0.000314603211142893	0.09	1382	1453	1604	2018	1630	1738	1396.75	1435.1	1444.38	1912.21	1864.28	1753.58	gene	protein_coding	5	65402133	65407294	-	101258561	MKP1_ARATH	Protein-tyrosine-phosphatase MKP1	Q:322-1692	H:37-486	68.467	E:0	Eukaryota; Viridiplantae; Streptophyta; Embryophyta; Tracheophyta; Spermatophyta; Magnoliopsida; eudicotyledons; Gunneridae; Pentapetalae; rosids; malvids; Brassicales; Brassicaceae; Camelineae; Arabidopsis`MKP1_ARATH	MKP1_ARATH	Protein-tyrosine-phosphatase MKP1	Q:1-854	H:1-766	49.767	E:0	Eukaryota; Viridiplantae; Streptophyta; Embryophyta; Tracheophyta; Spermatophyta; Magnoliopsida; eudicotyledons; Gunneridae; Pentapetalae; rosids; malvids; Brassicales; Brassicaceae; Camelineae; Arabidopsis	PF00782.21^DSPc^Dual specificity phosphatase, catalytic domain^163-293^E:1.2e-25	.	GO:0005829^cellular_component^cytosol`GO:0017017^molecular_function^MAP kinase tyrosine/serine/threonine phosphatase activity`GO:0004725^molecular_function^protein tyrosine phosphatase activity`GO:0006952^biological_process^defense response`GO:1902065^biological_process^response to L-glutamate`GO:0009651^biological_process^response to salt stress`GO:0010224^biological_process^response to UV-B`GO:…	GO:0005829^cellular_component^cytosol`GO:0017017^molecular_function^MAP kinase tyrosine/serine/threonine phosphatase activity`GO:0004725^molecular_function^protein tyrosine phosphatase activity`GO:0006952^biological_process^defense response`GO:1902065^biological_process^response to L-glutamate`GO:0009651^biological_process^response to salt stress`GO:0010224^biological_process^response to UV-B`GO:…	GO:0008138^molecular_function^protein tyrosine/serine/threonine phosphatase activity`GO:0016311^biological_process^dephosphorylation	KEGG:ath:AT3G55270
Solyc03g113130.3	41.97	0.18	2.44	-4.27294	1.92915573957747e-05	0.000315915254747043	0.57	120	49	48	18	5	16	121.28	48.4	43.22	17.06	5.72	16.14	gene	protein_coding	3	64882804	64886286	-	101247510	PCO2_ARATH	Plant cysteine oxidase 2 {ECO:0000303|PubMed:24599061}	Q:339-437	H:47-79	54.545	E:4.54e-05	Eukaryota; Viridiplantae; Streptophyta; Embryophyta; Tracheophyta; Spermatophyta; Magnoliopsida; eudicotyledons; Gunneridae; Pentapetalae; rosids; malvids; Brassicales; Brassicaceae; Camelineae; Arabidopsis	.	.	.	.	.	.	.	.	.	GO:0005829^cellular_component^cytosol`GO:0005634^cellular_component^nucleus`GO:0017172^molecular_function^cysteine dioxygenase activity`GO:0046872^molecular_function^metal ion binding`GO:0071456^biological_process^cellular response to hypoxia`GO:0070483^biological_process^detection of hypoxia`GO:0018171^biological_process^peptidyl-cysteine oxidation`GO:0001666^biological_process^response to hypox…	.	.	KEGG:ath:AT5G39890`KO:K23953
Solyc10g084023.1	46.93	0.19	2.37	-4.27286	1.9298196138486e-05	0.000315915254747043	0.55	135	58	47	15	8	22	136.44	57.29	42.32	14.21	9.15	22.2	gene	protein_coding	10	63820556	63821174	+		SAU32_ARATH	Auxin-responsive protein SAUR32 {ECO:0000305}	Q:11-211	H:23-89	44.776	E:9.32e-13	Eukaryota; Viridiplantae; Streptophyta; Embryophyta; Tracheophyta; Spermatophyta; Magnoliopsida; eudicotyledons; Gunneridae; Pentapetalae; rosids; malvids; Brassicales; Brassicaceae; Camelineae; Arabidopsis	.	.	.	.	.	.	.	.	.	GO:0005737^cellular_component^cytoplasm`GO:0005634^cellular_component^nucleus`GO:0009734^biological_process^auxin-activated signaling pathway`GO:0007275^biological_process^multicellular organism development`GO:0040008^biological_process^regulation of growth`GO:1900140^biological_process^regulation of seedling development	.	.	KEGG:ath:AT2G46690`KO:K14488
Solyc01g097840.3	691.59	0.72	0.47	-4.27182	1.93886059284697e-05	0.000317146538353464	0.11	848	788	859	615	529	548	857.05	778.29	773.52	582.76	605.03	552.91	gene	protein_coding	1	88418969	88423028	+	101243743	WNK1_ARATH	Serine/threonine-protein kinase WNK1	Q:3-1073	H:415-699	35.165	E:1.64e-31	Eukaryota; Viridiplantae; Streptophyta; Embryophyta; Tracheophyta; Spermatophyta; Magnoliopsida; eudicotyledons; Gunneridae; Pentapetalae; rosids; malvids; Brassicales; Brassicaceae; Camelineae; Arabidopsis	WNK1_ARATH	Serine/threonine-protein kinase WNK1	Q:1-357	H:415-699	36.314	E:9.31e-49	Eukaryota; Viridiplantae; Streptophyta; Embryophyta; Tracheophyta; Spermatophyta; Magnoliopsida; eudicotyledons; Gunneridae; Pentapetalae; rosids; malvids; Brassicales; Brassicaceae; Camelineae; Arabidopsis	.	.	GO:0005737^cellular_component^cytoplasm`GO:0005524^molecular_function^ATP binding`GO:0004672^molecular_function^protein kinase activity`GO:0004674^molecular_function^protein serine/threonine kinase activity`GO:0007623^biological_process^circadian rhythm`GO:0035556^biological_process^intracellular signal transduction`GO:0006468^biological_process^protein phosphorylation	GO:0005737^cellular_component^cytoplasm`GO:0005524^molecular_function^ATP binding`GO:0004672^molecular_function^protein kinase activity`GO:0004674^molecular_function^protein serine/threonine kinase activity`GO:0007623^biological_process^circadian rhythm`GO:0035556^biological_process^intracellular signal transduction`GO:0006468^biological_process^protein phosphorylation	.	KEGG:ath:AT3G04910`KO:K08867
Solyc07g066220.3	3720.66	0.65	0.62	-4.26763	1.97562973692491e-05	0.000322907939460428	0.15	4221	4381	5479	3207	2898	2422	4266.05	4327.02	4933.77	3038.87	3314.52	2443.71	gene	protein_coding	7	67825464	67831433	-	778199	WRKY2_ARATH	Probable WRKY transcription factor 2 {ECO:0000303|Ref.1}	Q:2-535	H:508-684	50	E:7.52e-35	Eukaryota; Viridiplantae; Streptophyta; Embryophyta; Tracheophyta; Spermatophyta; Magnoliopsida; eudicotyledons; Gunneridae; Pentapetalae; rosids; malvids; Brassicales; Brassicaceae; Camelineae; Arabidopsis`WRKY2_ARATH	WRKY2_ARATH	Probable WRKY transcription factor 2 {ECO:0000303|Ref.1}	Q:1-178	H:508-684	50	E:2.39e-36	Eukaryota; Viridiplantae; Streptophyta; Embryophyta; Tracheophyta; Spermatophyta; Magnoliopsida; eudicotyledons; Gunneridae; Pentapetalae; rosids; malvids; Brassicales; Brassicaceae; Camelineae; Arabidopsis`WRKY2_ARATH	PF03106.16^WRKY^WRKY DNA -binding domain^1-37^E:1.4e-10	.	GO:0005634^cellular_component^nucleus`GO:0003700^molecular_function^DNA-binding transcription factor activity`GO:0046872^molecular_function^metal ion binding`GO:0043565^molecular_function^sequence-specific DNA binding`GO:0030010^biological_process^establishment of cell polarity`GO:0009942^biological_process^longitudinal axis specification`GO:0009555^biological_process^pollen development`GO:000635…	GO:0005634^cellular_component^nucleus`GO:0003700^molecular_function^DNA-binding transcription factor activity`GO:0046872^molecular_function^metal ion binding`GO:0043565^molecular_function^sequence-specific DNA binding`GO:0030010^biological_process^establishment of cell polarity`GO:0009942^biological_process^longitudinal axis specification`GO:0009555^biological_process^pollen development`GO:000635…	GO:0003700^molecular_function^DNA-binding transcription factor activity`GO:0043565^molecular_function^sequence-specific DNA binding`GO:0006355^biological_process^regulation of transcription, DNA-templated	KEGG:ath:AT5G56270`KO:K18835
Solyc07g063905.1	955.79	1.64	-0.71	4.26656	1.98506517837259e-05	0.000324196247284762	0.17	793	755	699	1445	1044	986	801.46	745.7	629.44	1369.25	1194.05	994.84	gene	protein_coding	7	66379970	66380672	+	101264952	MUTS_BARBK	DNA mismatch repair protein MutS {ECO:0000255|HAMAP-Rule:MF_00096}	Q:148-297	H:249-294	36	E:0.54	Bacteria; Proteobacteria; Alphaproteobacteria; Rhizobiales; Bartonellaceae; Bartonella	IF2_SYNAS	Translation initiation factor IF-2 {ECO:0000255|HAMAP-Rule:MF_00100}	Q:27-99	H:188-260	24.658	E:0.48	Bacteria; Proteobacteria; Deltaproteobacteria; Syntrophobacterales; Syntrophaceae; Syntrophus	.	COG0532^One of the essential components for the initiation of protein synthesis. Protects formylmethionyl-tRNA from spontaneous hydrolysis and promotes its binding to the 30S ribosomal subunits. Also involved in the hydrolysis of GTP during the formation of the 70S ribosomal complex (By similarity)	GO:0005524^molecular_function^ATP binding`GO:0003684^molecular_function^damaged DNA binding`GO:0030983^molecular_function^mismatched DNA binding`GO:0006298^biological_process^mismatch repair	GO:0005737^cellular_component^cytoplasm`GO:0005525^molecular_function^GTP binding`GO:0003924^molecular_function^GTPase activity`GO:0003743^molecular_function^translation initiation factor activity	.	KEGG:sat:SYN_01787`KO:K02519
Solyc10g009580.3	512.53	1.42	-0.51	4.26457	2.0028597163815e-05	0.000326846661456722	0.12	437	420	458	589	562	600	441.66	414.82	412.42	558.12	642.77	605.38	gene	protein_coding	10	3690493	3692087	-		HQGT_RAUSE	Hydroquinone glucosyltransferase	Q:1-849	H:178-460	63.604	E:7.55e-127	Eukaryota; Viridiplantae; Streptophyta; Embryophyta; Tracheophyta; Spermatophyta; Magnoliopsida; eudicotyledons; Gunneridae; Pentapetalae; asterids; lamiids; Gentianales; Apocynaceae; Rauvolfioideae; Vinceae; Rauvolfiinae; Rauvolfia	HQGT_RAUSE	Hydroquinone glucosyltransferase	Q:1-283	H:178-460	63.604	E:5.9e-127	Eukaryota; Viridiplantae; Streptophyta; Embryophyta; Tracheophyta; Spermatophyta; Magnoliopsida; eudicotyledons; Gunneridae; Pentapetalae; asterids; lamiids; Gentianales; Apocynaceae; Rauvolfioideae; Vinceae; Rauvolfiinae; Rauvolfia	PF00201.19^UDPGT^UDP-glucoronosyl and UDP-glucosyl transferase^82-260^E:7.7e-21	.	GO:0050505^molecular_function^hydroquinone glucosyltransferase activity	GO:0050505^molecular_function^hydroquinone glucosyltransferase activity	GO:0016758^molecular_function^transferase activity, transferring hexosyl groups	KEGG:ag:CAC35167`KO:K08237
Solyc10g080010.2	1901	0.11	3.17	-4.26278	2.01903527249666e-05	0.000329228939121487	0.74	1918	3368	5551	317	618	134	1938.47	3326.5	4998.6	300.38	706.82	135.2	gene	protein_coding	10	61559031	61561707	+		MUC21_ARATH	Xylan glycosyltransferase MUCI21 {ECO:0000305}	Q:3-1259	H:99-493	58.907	E:1.47e-170	Eukaryota; Viridiplantae; Streptophyta; Embryophyta; Tracheophyta; Spermatophyta; Magnoliopsida; eudicotyledons; Gunneridae; Pentapetalae; rosids; malvids; Brassicales; Brassicaceae; Camelineae; Arabidopsis	MUC21_ARATH	Xylan glycosyltransferase MUCI21 {ECO:0000305}	Q:1-419	H:99-493	58.907	E:7.62e-172	Eukaryota; Viridiplantae; Streptophyta; Embryophyta; Tracheophyta; Spermatophyta; Magnoliopsida; eudicotyledons; Gunneridae; Pentapetalae; rosids; malvids; Brassicales; Brassicaceae; Camelineae; Arabidopsis	PF04577.15^DUF563^Protein of unknown function (DUF563)^243-356^E:1.7e-17	.	GO:0005794^cellular_component^Golgi apparatus`GO:0000139^cellular_component^Golgi membrane`GO:0016021^cellular_component^integral component of membrane`GO:0047517^molecular_function^1,4-beta-D-xylan synthase activity`GO:0016757^molecular_function^transferase activity, transferring glycosyl groups`GO:0071555^biological_process^cell wall organization`GO:0010192^biological_process^mucilage biosynthe…	GO:0005794^cellular_component^Golgi apparatus`GO:0000139^cellular_component^Golgi membrane`GO:0016021^cellular_component^integral component of membrane`GO:0047517^molecular_function^1,4-beta-D-xylan synthase activity`GO:0016757^molecular_function^transferase activity, transferring glycosyl groups`GO:0071555^biological_process^cell wall organization`GO:0010192^biological_process^mucilage biosynthe…	GO:0016757^molecular_function^transferase activity, transferring glycosyl groups	KEGG:ath:AT3G10320
Solyc02g089540.3	1922.82	1.52	-0.6	4.26209	2.02525359112043e-05	0.000329985112832675	0.14	1582	1591	1567	2491	2301	1946	1598.88	1571.4	1411.06	2360.41	2631.72	1963.44	gene	protein_coding	2	51959904	51963221	-	778253	COL2_ARATH	Zinc finger protein CONSTANS-LIKE 2	Q:1-357	H:229-347	70.588	E:5.15e-48	Eukaryota; Viridiplantae; Streptophyta; Embryophyta; Tracheophyta; Spermatophyta; Magnoliopsida; eudicotyledons; Gunneridae; Pentapetalae; rosids; malvids; Brassicales; Brassicaceae; Camelineae; Arabidopsis	COL2_ARATH	Zinc finger protein CONSTANS-LIKE 2	Q:1-119	H:229-347	70.588	E:7.39e-51	Eukaryota; Viridiplantae; Streptophyta; Embryophyta; Tracheophyta; Spermatophyta; Magnoliopsida; eudicotyledons; Gunneridae; Pentapetalae; rosids; malvids; Brassicales; Brassicaceae; Camelineae; Arabidopsis	PF06203.15^CCT^CCT motif^50-92^E:1.7e-18	.	GO:0005634^cellular_component^nucleus`GO:0003677^molecular_function^DNA binding`GO:0003700^molecular_function^DNA-binding transcription factor activity`GO:0008270^molecular_function^zinc ion binding`GO:0009658^biological_process^chloroplast organization`GO:0009909^biological_process^regulation of flower development	GO:0005634^cellular_component^nucleus`GO:0003677^molecular_function^DNA binding`GO:0003700^molecular_function^DNA-binding transcription factor activity`GO:0008270^molecular_function^zinc ion binding`GO:0009658^biological_process^chloroplast organization`GO:0009909^biological_process^regulation of flower development	GO:0005515^molecular_function^protein binding	KEGG:ath:AT3G02380
Solyc01g007870.3	46.9	3.15	-1.66	4.26093	2.03579565590023e-05	0.00033144404781552	0.39	24	26	20	56	52	100	24.26	25.68	18.01	53.06	59.47	100.9	gene	protein_coding	1	1967558	1968452	-	101253518	GIR2_ARATH	Protein GL2-INTERACTING REPRESSOR 2 {ECO:0000303|PubMed:28526410}	Q:29-373	H:1-95	55.652	E:3.92e-29	Eukaryota; Viridiplantae; Streptophyta; Embryophyta; Tracheophyta; Spermatophyta; Magnoliopsida; eudicotyledons; Gunneridae; Pentapetalae; rosids; malvids; Brassicales; Brassicaceae; Camelineae; Arabidopsis	GIR2_ARATH	Protein GL2-INTERACTING REPRESSOR 2 {ECO:0000303|PubMed:28526410}	Q:10-124	H:1-95	57.391	E:8.46e-31	Eukaryota; Viridiplantae; Streptophyta; Embryophyta; Tracheophyta; Spermatophyta; Magnoliopsida; eudicotyledons; Gunneridae; Pentapetalae; rosids; malvids; Brassicales; Brassicaceae; Camelineae; Arabidopsis	.	.	GO:0005634^cellular_component^nucleus`GO:0080167^biological_process^response to karrikin`GO:0080147^biological_process^root hair cell development	GO:0005634^cellular_component^nucleus`GO:0080167^biological_process^response to karrikin`GO:0080147^biological_process^root hair cell development	.	KEGG:ath:AT3G11600
Solyc03g113460.1	394.1	1.93	-0.95	4.26004	2.04385847541639e-05	0.000332497381908737	0.22	354	253	221	525	457	533	357.78	249.88	199.01	497.48	522.68	537.78	gene	protein_coding	3	65086411	65087211	+	101266112	NEPS1_NEPRA	(+)-cis,trans-nepetalactol synthase NEPS1 {ECO:0000305}	Q:16-732	H:13-250	61.088	E:1.35e-98	Eukaryota; Viridiplantae; Streptophyta; Embryophyta; Tracheophyta; Spermatophyta; Magnoliopsida; eudicotyledons; Gunneridae; Pentapetalae; asterids; lamiids; Lamiales; Lamiaceae; Nepetoideae; Mentheae; Nepeta	NEPS1_NEPRA	(+)-cis,trans-nepetalactol synthase NEPS1 {ECO:0000305}	Q:6-260	H:13-266	60.784	E:4.53e-106	Eukaryota; Viridiplantae; Streptophyta; Embryophyta; Tracheophyta; Spermatophyta; Magnoliopsida; eudicotyledons; Gunneridae; Pentapetalae; asterids; lamiids; Lamiales; Lamiaceae; Nepetoideae; Mentheae; Nepeta	PF00106.26^adh_short^short chain dehydrogenase^11-203^E:6.3e-47`PF08659.11^KR^KR domain^14-173^E:9.7e-12`PF13561.7^adh_short_C2^Enoyl-(Acyl carrier protein) reductase^17-256^E:2.6e-62	.	GO:0016853^molecular_function^isomerase activity`GO:0016491^molecular_function^oxidoreductase activity	GO:0016853^molecular_function^isomerase activity`GO:0016491^molecular_function^oxidoreductase activity	.	KEGG:ag:AXF35971`KO:K23990
Solyc11g065360.2	4645.25	1.3	-0.38	4.25958	2.04811002308745e-05	0.000332929535840196	0.09	4085	4271	4207	5696	4634	4994	4128.6	4218.37	3788.35	5397.39	5300.03	5038.76	gene	protein_coding	11	51079518	51102945	+		AB13G_ARATH	ABC transporter G family member 13	Q:1-363	H:561-678	55.372	E:1.45e-25	Eukaryota; Viridiplantae; Streptophyta; Embryophyta; Tracheophyta; Spermatophyta; Magnoliopsida; eudicotyledons; Gunneridae; Pentapetalae; rosids; malvids; Brassicales; Brassicaceae; Camelineae; Arabidopsis	AB13G_ARATH	ABC transporter G family member 13	Q:1-121	H:561-678	55.372	E:1.67e-40	Eukaryota; Viridiplantae; Streptophyta; Embryophyta; Tracheophyta; Spermatophyta; Magnoliopsida; eudicotyledons; Gunneridae; Pentapetalae; rosids; malvids; Brassicales; Brassicaceae; Camelineae; Arabidopsis	.	.	GO:0016021^cellular_component^integral component of membrane`GO:0005886^cellular_component^plasma membrane`GO:0009506^cellular_component^plasmodesma`GO:0005524^molecular_function^ATP binding`GO:0016887^molecular_function^ATPase activity`GO:0042626^molecular_function^ATPase-coupled transmembrane transporter activity`GO:0080051^biological_process^cutin transport`GO:0080172^biological_process^petal …	GO:0016021^cellular_component^integral component of membrane`GO:0005886^cellular_component^plasma membrane`GO:0009506^cellular_component^plasmodesma`GO:0005524^molecular_function^ATP binding`GO:0016887^molecular_function^ATPase activity`GO:0042626^molecular_function^ATPase-coupled transmembrane transporter activity`GO:0080051^biological_process^cutin transport`GO:0080172^biological_process^petal …	.	KEGG:ath:AT1G51460
Solyc07g008620.1	988.2	0.47	1.1	-4.2589	2.05437238176616e-05	0.000333687629200181	0.26	1318	1197	1692	657	752	405	1332.07	1182.25	1523.62	622.56	860.08	408.63	gene	protein_coding	7	3569764	3572859	-	543900	EIX1_SOLLC	Receptor-like protein EIX1 {ECO:0000305}	Q:1-3060	H:1-1020	100	E:0	Eukaryota; Viridiplantae; Streptophyta; Embryophyta; Tracheophyta; Spermatophyta; Magnoliopsida; eudicotyledons; Gunneridae; Pentapetalae; asterids; lamiids; Solanales; Solanaceae; Solanoideae; Solaneae; Solanum; Solanum subgen. Lycopersicon	EIX1_SOLLC	Receptor-like protein EIX1 {ECO:0000305}	Q:1-1031	H:1-1031	100	E:0	Eukaryota; Viridiplantae; Streptophyta; Embryophyta; Tracheophyta; Spermatophyta; Magnoliopsida; eudicotyledons; Gunneridae; Pentapetalae; asterids; lamiids; Solanales; Solanaceae; Solanoideae; Solaneae; Solanum; Solanum subgen. Lycopersicon	PF08263.13^LRRNT_2^Leucine rich repeat N-terminal domain^36-77^E:2.1e-10`PF13516.7^LRR_6^Leucine Rich repeat^119-130^E:280`PF00560.34^LRR_1^Leucine Rich Repeat^120-134^E:1500`PF13855.7^LRR_8^Leucine rich repeat^144-202^E:5.3e-10`PF00560.34^LRR_1^Leucine Rich Repeat^144-166^E:75`PF13516.7^LRR_6^Leucine Rich repeat^144-151^E:10000`PF13516.7^LRR_6^Leucine Rich repeat^166-179^E:36`PF00560.34^LRR_1^Le…	.	GO:0016021^cellular_component^integral component of membrane`GO:0005886^cellular_component^plasma membrane`GO:0050832^biological_process^defense response to fungus	GO:0016021^cellular_component^integral component of membrane`GO:0005886^cellular_component^plasma membrane`GO:0050832^biological_process^defense response to fungus	GO:0005515^molecular_function^protein binding	KEGG:sly:543900`KO:K13466
Solyc07g042630.3	2288.55	1.56	-0.64	4.25814	2.06139010883524e-05	0.000334567141147816	0.15	1732	1701	2156	3182	2678	2261	1750.49	1680.04	1941.45	3015.18	3062.9	2281.26	gene	protein_coding	7	56220171	56230720	-	101265842	LUPS_BETPL	Lupeol synthase	Q:4-96	H:721-751	74.194	E:1.14e-09	Eukaryota; Viridiplantae; Streptophyta; Embryophyta; Tracheophyta; Spermatophyta; Magnoliopsida; eudicotyledons; Gunneridae; Pentapetalae; rosids; fabids; Fagales; Betulaceae; Betula	.	.	.	.	.	.	.	.	.	GO:0005811^cellular_component^lipid droplet`GO:0042300^molecular_function^beta-amyrin synthase activity`GO:0000250^molecular_function^lanosterol synthase activity`GO:0042299^molecular_function^lupeol synthase activity`GO:0019745^biological_process^pentacyclic triterpenoid biosynthetic process	.	.	KEGG:ag:BAB83087`KO:K20659
Solyc02g092537.1	296.44	1.56	-0.64	4.25794	2.06322917084017e-05	0.000334605433207273	0.15	245	237	237	341	327	383	247.61	234.08	213.42	323.12	374	386.43	gene	protein_coding	2	54237772	54238773	+		.	.	.	.	.	.	.	.	.	.	.	.	.	.	.	.	.	.	.	.
Solyc12g094660.2	4121.6	0.56	0.84	-4.25738	2.06839432723873e-05	0.00033518265837055	0.2	5060	4975	6480	2892	3346	2279	5114.01	4913.7	5835.15	2740.39	3826.91	2299.42	gene	protein_coding	12	65796650	65804016	-		RPM1_ARATH	Disease resistance protein RPM1	Q:1122-3188	H:195-892	27.984	E:1.88e-58	Eukaryota; Viridiplantae; Streptophyta; Embryophyta; Tracheophyta; Spermatophyta; Magnoliopsida; eudicotyledons; Gunneridae; Pentapetalae; rosids; malvids; Brassicales; Brassicaceae; Camelineae; Arabidopsis	RP8L3_ARATH	Disease resistance RPP8-like protein 3	Q:229-948	H:157-876	28.743	E:7.67e-70	Eukaryota; Viridiplantae; Streptophyta; Embryophyta; Tracheophyta; Spermatophyta; Magnoliopsida; eudicotyledons; Gunneridae; Pentapetalae; rosids; malvids; Brassicales; Brassicaceae; Camelineae; Arabidopsis	PF00931.23^NB-ARC^NB-ARC domain^241-485^E:9.6e-39`PF13401.7^AAA_22^AAA domain^260-374^E:5.6e-07	.	GO:0012505^cellular_component^endomembrane system`GO:0019897^cellular_component^extrinsic component of plasma membrane`GO:0005886^cellular_component^plasma membrane`GO:0043531^molecular_function^ADP binding`GO:0005524^molecular_function^ATP binding`GO:0000166^molecular_function^nucleotide binding`GO:0009626^biological_process^plant-type hypersensitive response	GO:0005886^cellular_component^plasma membrane`GO:0043531^molecular_function^ADP binding`GO:0005524^molecular_function^ATP binding`GO:0006952^biological_process^defense response	GO:0043531^molecular_function^ADP binding	KEGG:ath:AT5G35450
Solyc03g082920.3	7090.08	0.74	0.44	-4.25695	2.07230618252704e-05	0.000335556048422842	0.1	7465	8043	9979	6175	5212	6198	7544.67	7943.9	8985.96	5851.28	5961.11	6253.55	gene	protein_coding	3	54223228	54226999	-		BIP8_TOBAC	Luminal-binding protein 8	Q:2-457	H:129-280	98.026	E:4.88e-78	Eukaryota; Viridiplantae; Streptophyta; Embryophyta; Tracheophyta; Spermatophyta; Magnoliopsida; eudicotyledons; Gunneridae; Pentapetalae; asterids; lamiids; Solanales; Solanaceae; Nicotianoideae; Nicotianeae; Nicotiana	BIP5_TOBAC	Luminal-binding protein 5	Q:1-167	H:502-668	97.006	E:7.43e-109	Eukaryota; Viridiplantae; Streptophyta; Embryophyta; Tracheophyta; Spermatophyta; Magnoliopsida; eudicotyledons; Gunneridae; Pentapetalae; asterids; lamiids; Solanales; Solanaceae; Nicotianoideae; Nicotianeae; Nicotiana	PF00012.21^HSP70^Hsp70 protein^1-144^E:8.5e-33	.	GO:0005737^cellular_component^cytoplasm`GO:0034663^cellular_component^endoplasmic reticulum chaperone complex`GO:0005788^cellular_component^endoplasmic reticulum lumen`GO:0016020^cellular_component^membrane`GO:0005634^cellular_component^nucleus`GO:0005524^molecular_function^ATP binding`GO:0016887^molecular_function^ATPase activity`GO:0031072^molecular_function^heat shock protein binding`GO:005178…	GO:0005737^cellular_component^cytoplasm`GO:0034663^cellular_component^endoplasmic reticulum chaperone complex`GO:0005788^cellular_component^endoplasmic reticulum lumen`GO:0016020^cellular_component^membrane`GO:0005634^cellular_component^nucleus`GO:0005524^molecular_function^ATP binding`GO:0016887^molecular_function^ATPase activity`GO:0031072^molecular_function^heat shock protein binding`GO:005178…	.	KEGG:nta:107771425`KO:K09490
Solyc01g091490.3	371.45	0.39	1.37	-4.25579	2.08316324256926e-05	0.000337052582937253	0.32	338	517	838	199	243	154	341.61	510.63	754.61	188.57	277.93	155.38	gene	protein_coding	1	84995182	84996727	-		.	.	.	.	.	.	.	.	.	.	.	.	.	.	.	.	.	.	.	.
Solyc04g072780.3	3157.73	1.46	-0.54	4.25465	2.09380561071997e-05	0.000338512089132047	0.13	2768	2573	2642	3979	2896	4109	2797.54	2541.3	2379.09	3770.4	3312.23	4145.82	gene	protein_coding	4	59843197	59844288	+	101246821	IRM1_ARATH	Protein INCREASED RESISTANCE TO MYZUS PERSICAE 1 {ECO:0000303|PubMed:23951039}	Q:2-94	H:79-109	61.29	E:3.43e-05	Eukaryota; Viridiplantae; Streptophyta; Embryophyta; Tracheophyta; Spermatophyta; Magnoliopsida; eudicotyledons; Gunneridae; Pentapetalae; rosids; malvids; Brassicales; Brassicaceae; Camelineae; Arabidopsis	.	.	.	.	.	.	.	.	.	GO:0005737^cellular_component^cytoplasm`GO:0005829^cellular_component^cytosol`GO:0005634^cellular_component^nucleus`GO:0019900^molecular_function^kinase binding`GO:0046872^molecular_function^metal ion binding`GO:0002213^biological_process^defense response to insect`GO:0009625^biological_process^response to insect`GO:0042594^biological_process^response to starvation	.	.	KEGG:ath:AT5G65040
Solyc04g049800.3	743.86	1.58	-0.66	4.25213	2.1174952159544e-05	0.000341812530142306	0.16	674	544	567	879	863	906	681.19	537.3	510.58	832.92	987.04	914.12	gene	protein_coding	4	43504108	43506899	+	101252772	.	.	.	.	.	.	.	.	.	.	.	.	.	.	.	.	.	.	.	.
Solyc12g006820.2	1753.99	1.33	-0.41	4.25224	2.11639689480129e-05	0.000341812530142306	0.1	1528	1457	1702	2026	1878	1923	1544.31	1439.05	1532.63	1919.79	2147.92	1940.23	gene	protein_coding	12	1238303	1246247	+		KCS11_ARATH	3-ketoacyl-CoA synthase 11 {ECO:0000303|PubMed:18465198}	Q:24-1535	H:4-507	76.786	E:0	Eukaryota; Viridiplantae; Streptophyta; Embryophyta; Tracheophyta; Spermatophyta; Magnoliopsida; eudicotyledons; Gunneridae; Pentapetalae; rosids; malvids; Brassicales; Brassicaceae; Camelineae; Arabidopsis	KCS11_ARATH	3-ketoacyl-CoA synthase 11 {ECO:0000303|PubMed:18465198}	Q:8-511	H:4-507	76.786	E:0	Eukaryota; Viridiplantae; Streptophyta; Embryophyta; Tracheophyta; Spermatophyta; Magnoliopsida; eudicotyledons; Gunneridae; Pentapetalae; rosids; malvids; Brassicales; Brassicaceae; Camelineae; Arabidopsis	PF08392.13^FAE1_CUT1_RppA^FAE1/Type III polyketide synthase-like protein^96-385^E:7.8e-140`PF08541.11^ACP_syn_III_C^3-Oxoacyl-[acyl-carrier-protein (ACP)] synthase III C terminal^402-482^E:2.4e-10`PF02797.16^Chal_sti_synt_C^Chalcone and stilbene synthases, C-terminal domain^404-477^E:6.8e-09	.	GO:0016021^cellular_component^integral component of membrane`GO:0102336^molecular_function^3-oxo-arachidoyl-CoA synthase activity`GO:0102337^molecular_function^3-oxo-cerotoyl-CoA synthase activity`GO:0102338^molecular_function^3-oxo-lignoceronyl-CoA synthase activity`GO:0102756^molecular_function^very-long-chain 3-ketoacyl-CoA synthase activity`GO:0006633^biological_process^fatty acid biosyntheti…	GO:0016021^cellular_component^integral component of membrane`GO:0102336^molecular_function^3-oxo-arachidoyl-CoA synthase activity`GO:0102337^molecular_function^3-oxo-cerotoyl-CoA synthase activity`GO:0102338^molecular_function^3-oxo-lignoceronyl-CoA synthase activity`GO:0102756^molecular_function^very-long-chain 3-ketoacyl-CoA synthase activity`GO:0006633^biological_process^fatty acid biosyntheti…	GO:0016747^molecular_function^transferase activity, transferring acyl groups other than amino-acyl groups`GO:0006633^biological_process^fatty acid biosynthetic process`GO:0016020^cellular_component^membrane	KEGG:ath:AT2G26640`KO:K15397
Solyc08g068490.3	3025.26	1.46	-0.55	4.24842	2.15278873877749e-05	0.00034724116349122	0.13	2153	2856	2634	3767	3319	3387	2175.98	2820.81	2371.88	3569.52	3796.03	3417.35	gene	protein_coding	8	57696077	57700082	-		GH310_ARATH	Indole-3-acetic acid-amido synthetase GH3.10 {ECO:0000305}	Q:3-536	H:414-590	69.101	E:2.91e-81	Eukaryota; Viridiplantae; Streptophyta; Embryophyta; Tracheophyta; Spermatophyta; Magnoliopsida; eudicotyledons; Gunneridae; Pentapetalae; rosids; malvids; Brassicales; Brassicaceae; Camelineae; Arabidopsis	GH310_ARATH	Indole-3-acetic acid-amido synthetase GH3.10 {ECO:0000305}	Q:1-178	H:414-590	69.101	E:7.4e-82	Eukaryota; Viridiplantae; Streptophyta; Embryophyta; Tracheophyta; Spermatophyta; Magnoliopsida; eudicotyledons; Gunneridae; Pentapetalae; rosids; malvids; Brassicales; Brassicaceae; Camelineae; Arabidopsis	PF03321.14^GH3^GH3 auxin-responsive promoter^1-159^E:1.5e-51	.	GO:0009507^cellular_component^chloroplast`GO:0005737^cellular_component^cytoplasm`GO:0016881^molecular_function^acid-amino acid ligase activity`GO:0009416^biological_process^response to light stimulus	GO:0009507^cellular_component^chloroplast`GO:0005737^cellular_component^cytoplasm`GO:0016881^molecular_function^acid-amino acid ligase activity`GO:0009416^biological_process^response to light stimulus	.	KEGG:ath:AT4G03400`KO:K14487
Solyc11g010330.2	2497.15	0.51	0.98	-4.24739	2.16276846175164e-05	0.000348581492924172	0.23	3048	3150	4161	1661	1988	1186	3080.53	3111.19	3746.92	1573.92	2273.73	1196.63	gene	protein_coding	11	3403875	3407542	+		ATL54_ARATH	RING-H2 finger protein ATL54	Q:357-686	H:120-231	58.929	E:3.16e-36	Eukaryota; Viridiplantae; Streptophyta; Embryophyta; Tracheophyta; Spermatophyta; Magnoliopsida; eudicotyledons; Gunneridae; Pentapetalae; rosids; malvids; Brassicales; Brassicaceae; Camelineae; Arabidopsis	ATL54_ARATH	RING-H2 finger protein ATL54	Q:73-316	H:70-306	39.841	E:2.33e-40	Eukaryota; Viridiplantae; Streptophyta; Embryophyta; Tracheophyta; Spermatophyta; Magnoliopsida; eudicotyledons; Gunneridae; Pentapetalae; rosids; malvids; Brassicales; Brassicaceae; Camelineae; Arabidopsis	PF13639.7^zf-RING_2^Ring finger domain^173-216^E:3.7e-13`PF17123.6^zf-RING_11^RING-like zinc finger^173-202^E:3.2e-11`PF13923.7^zf-C3HC4_2^Zinc finger, C3HC4 type (RING finger)^174-215^E:4e-08`PF00097.26^zf-C3HC4^Zinc finger, C3HC4 type (RING finger)^174-215^E:3.3e-07`PF13445.7^zf-RING_UBOX^RING-type zinc-finger^174-213^E:0.0017`PF12861.8^zf-ANAPC11^Anaphase-promoting complex subunit 11 RING-H2 f…	.	GO:0016021^cellular_component^integral component of membrane`GO:0046872^molecular_function^metal ion binding`GO:0016740^molecular_function^transferase activity`GO:0016567^biological_process^protein ubiquitination	GO:0016021^cellular_component^integral component of membrane`GO:0046872^molecular_function^metal ion binding`GO:0016740^molecular_function^transferase activity`GO:0016567^biological_process^protein ubiquitination	GO:0046872^molecular_function^metal ion binding`GO:0004842^molecular_function^ubiquitin-protein transferase activity`GO:0005680^cellular_component^anaphase-promoting complex`GO:0008270^molecular_function^zinc ion binding	KEGG:ath:AT1G72220
Solyc10g083920.2	1330.62	0.66	0.61	-4.24525	2.18353536323783e-05	0.000351502748216913	0.14	1426	1709	1874	1145	1030	896	1441.22	1687.94	1687.51	1084.97	1178.04	904.03	gene	protein_coding	10	63747603	63754495	-	101268818	2A5A_ARATH	Serine/threonine protein phosphatase 2A 57 kDa regulatory subunit B' alpha isoform	Q:401-1576	H:1-387	74.43	E:0	Eukaryota; Viridiplantae; Streptophyta; Embryophyta; Tracheophyta; Spermatophyta; Magnoliopsida; eudicotyledons; Gunneridae; Pentapetalae; rosids; malvids; Brassicales; Brassicaceae; Camelineae; Arabidopsis	2A5A_ARATH	Serine/threonine protein phosphatase 2A 57 kDa regulatory subunit B' alpha isoform	Q:1-392	H:1-387	74.43	E:0	Eukaryota; Viridiplantae; Streptophyta; Embryophyta; Tracheophyta; Spermatophyta; Magnoliopsida; eudicotyledons; Gunneridae; Pentapetalae; rosids; malvids; Brassicales; Brassicaceae; Camelineae; Arabidopsis	PF01603.21^B56^Protein phosphatase 2A regulatory B subunit (B56 family)^77-392^E:3.4e-145	.	GO:0005737^cellular_component^cytoplasm`GO:0005829^cellular_component^cytosol`GO:0005634^cellular_component^nucleus`GO:0000159^cellular_component^protein phosphatase type 2A complex`GO:0072542^molecular_function^protein phosphatase activator activity`GO:0009742^biological_process^brassinosteroid mediated signaling pathway`GO:0009554^biological_process^megasporogenesis`GO:0051177^biological_proces…	GO:0005737^cellular_component^cytoplasm`GO:0005829^cellular_component^cytosol`GO:0005634^cellular_component^nucleus`GO:0000159^cellular_component^protein phosphatase type 2A complex`GO:0072542^molecular_function^protein phosphatase activator activity`GO:0009742^biological_process^brassinosteroid mediated signaling pathway`GO:0009554^biological_process^megasporogenesis`GO:0051177^biological_proces…	GO:0019888^molecular_function^protein phosphatase regulator activity`GO:0007165^biological_process^signal transduction`GO:0000159^cellular_component^protein phosphatase type 2A complex	KEGG:ath:AT5G03470`KO:K11584
Solyc01g090970.3	9685.49	1.67	-0.74	4.24517	2.18426151991825e-05	0.000351502748216913	0.17	8874	7139	6351	12360	10168	12917	8968.71	7051.03	5718.99	11712	11629.4	13032.8	gene	protein_coding	1	84552110	84552478	-	101245586	LBP65_ARATH	Putative lipid-binding protein At4g00165	Q:79-363	H:33-128	62.5	E:9.49e-40	Eukaryota; Viridiplantae; Streptophyta; Embryophyta; Tracheophyta; Spermatophyta; Magnoliopsida; eudicotyledons; Gunneridae; Pentapetalae; rosids; malvids; Brassicales; Brassicaceae; Camelineae; Arabidopsis	LBP65_ARATH	Putative lipid-binding protein At4g00165	Q:27-121	H:33-128	62.5	E:8.64e-40	Eukaryota; Viridiplantae; Streptophyta; Embryophyta; Tracheophyta; Spermatophyta; Magnoliopsida; eudicotyledons; Gunneridae; Pentapetalae; rosids; malvids; Brassicales; Brassicaceae; Camelineae; Arabidopsis	PF14368.7^LTP_2^Probable lipid transfer^21-121^E:5.3e-07`PF14547.7^Hydrophob_seed^Hydrophobic seed protein^38-122^E:1.2e-25`PF00234.23^Tryp_alpha_amyl^Protease inhibitor/seed storage/LTP family^39-121^E:1.1e-07	.	GO:0005576^cellular_component^extracellular region	GO:0005576^cellular_component^extracellular region	.	KEGG:ath:AT4G00165
Solyc08g005960.2	7090.74	1.5	-0.59	4.23807	2.25447932232863e-05	0.000362523054049639	0.14	5623	5453	6586	10584	7068	7366	5683.02	5385.81	5930.6	10029.1	8083.87	7432.01	gene	protein_coding	8	706535	726220	-	101254713	ERLI1_ARATH	Lipid transfer protein EARLI 1	Q:163-402	H:87-167	69.136	E:3.1e-26	Eukaryota; Viridiplantae; Streptophyta; Embryophyta; Tracheophyta; Spermatophyta; Magnoliopsida; eudicotyledons; Gunneridae; Pentapetalae; rosids; malvids; Brassicales; Brassicaceae; Camelineae; Arabidopsis	ERLL2_ARATH	pEARLI1-like lipid transfer protein 2	Q:1-134	H:1-181	46.703	E:5.26e-39	Eukaryota; Viridiplantae; Streptophyta; Embryophyta; Tracheophyta; Spermatophyta; Magnoliopsida; eudicotyledons; Gunneridae; Pentapetalae; rosids; malvids; Brassicales; Brassicaceae; Camelineae; Arabidopsis	PF14547.7^Hydrophob_seed^Hydrophobic seed protein^52-135^E:2e-28`PF00234.23^Tryp_alpha_amyl^Protease inhibitor/seed storage/LTP family^60-134^E:3.6e-06	.	GO:0009707^cellular_component^chloroplast outer membrane`GO:0005783^cellular_component^endoplasmic reticulum`GO:0005576^cellular_component^extracellular region`GO:0009505^cellular_component^plant-type cell wall`GO:0009506^cellular_component^plasmodesma`GO:0099503^cellular_component^secretory vesicle`GO:0050832^biological_process^defense response to fungus`GO:0009682^biological_process^induced sys…	GO:0005618^cellular_component^cell wall`GO:0009707^cellular_component^chloroplast outer membrane`GO:0005783^cellular_component^endoplasmic reticulum`GO:0005576^cellular_component^extracellular region`GO:0009506^cellular_component^plasmodesma`GO:0050832^biological_process^defense response to fungus	.	KEGG:ath:AT4G12490
Solyc09g072810.3	260.36	0.55	0.86	-4.23768	2.25840664472843e-05	0.000362875007611792	0.2	276	314	463	186	176	177	278.95	310.13	416.93	176.25	201.3	178.59	gene	protein_coding	9	65935375	65939138	+	101246565	MIK2_ARATH	MDIS1-interacting receptor like kinase 2 {ECO:0000303|PubMed:26863186}	Q:736-3294	H:98-949	42.442	E:0	Eukaryota; Viridiplantae; Streptophyta; Embryophyta; Tracheophyta; Spermatophyta; Magnoliopsida; eudicotyledons; Gunneridae; Pentapetalae; rosids; malvids; Brassicales; Brassicaceae; Camelineae; Arabidopsis`MIK2_ARATH	MIK2_ARATH	MDIS1-interacting receptor like kinase 2 {ECO:0000303|PubMed:26863186}	Q:246-1098	H:98-949	42.907	E:0	Eukaryota; Viridiplantae; Streptophyta; Embryophyta; Tracheophyta; Spermatophyta; Magnoliopsida; eudicotyledons; Gunneridae; Pentapetalae; rosids; malvids; Brassicales; Brassicaceae; Camelineae; Arabidopsis`MIK2_ARATH	PF08263.13^LRRNT_2^Leucine rich repeat N-terminal domain^30-68^E:6.2e-05`PF00560.34^LRR_1^Leucine Rich Repeat^100-118^E:470`PF13855.7^LRR_8^Leucine rich repeat^122-180^E:3.1e-07`PF00560.34^LRR_1^Leucine Rich Repeat^122-143^E:0.89`PF00560.34^LRR_1^Leucine Rich Repeat^145-167^E:260`PF00560.34^LRR_1^Leucine Rich Repeat^169-181^E:650`PF00560.34^LRR_1^Leucine Rich Repeat^194-209^E:4600`PF13306.7^LRR_5…	.	GO:0016021^cellular_component^integral component of membrane`GO:0005886^cellular_component^plasma membrane`GO:0009506^cellular_component^plasmodesma`GO:0090406^cellular_component^pollen tube`GO:0005524^molecular_function^ATP binding`GO:0004674^molecular_function^protein serine/threonine kinase activity`GO:0009755^biological_process^hormone-mediated signaling pathway`GO:0010183^biological_process^…	GO:0016021^cellular_component^integral component of membrane`GO:0005886^cellular_component^plasma membrane`GO:0009506^cellular_component^plasmodesma`GO:0090406^cellular_component^pollen tube`GO:0005524^molecular_function^ATP binding`GO:0004674^molecular_function^protein serine/threonine kinase activity`GO:0009755^biological_process^hormone-mediated signaling pathway`GO:0010183^biological_process^…	GO:0005515^molecular_function^protein binding`GO:0004672^molecular_function^protein kinase activity`GO:0005524^molecular_function^ATP binding`GO:0006468^biological_process^protein phosphorylation	KEGG:ath:AT4G08850
Solyc06g008100.3	68.57	0.49	1.03	-4.23632	2.27208055652415e-05	0.000364791272121324	0.24	98	90	98	50	38	44	99.05	88.89	88.25	47.38	43.46	44.39	gene	nontranslating_CDS	6	1985212	1986358	-		.	.	.	.	.	.	.	.	.	.	.	.	.	.	.	.	.	.	.	.
Solyc02g069620.3	962.94	1.41	-0.49	4.23144	2.3219746778337e-05	0.000372229304729225	0.12	786	834	867	1090	959	1238	794.39	823.72	780.72	1032.86	1096.83	1249.09	gene	protein_coding	2	40025451	40028161	-		MGAP_HUMAN	MAX gene-associated protein	Q:3-176	H:2739-2795	31.034	E:7.5	Eukaryota; Metazoa; Chordata; Craniata; Vertebrata; Euteleostomi; Mammalia; Eutheria; Euarchontoglires; Primates; Haplorrhini; Catarrhini; Hominidae; Homo	.	.	.	.	.	.	.	.	.	GO:0071339^cellular_component^MLL1 complex`GO:0000790^cellular_component^nuclear chromatin`GO:0005654^cellular_component^nucleoplasm`GO:0005634^cellular_component^nucleus`GO:0001228^molecular_function^DNA-binding transcription activator activity, RNA polymerase II-specific`GO:0000981^molecular_function^DNA-binding transcription factor activity, RNA polymerase II-specific`GO:0046983^molecular_func…	.	.	KEGG:hsa:23269`KO:K23399
Solyc01g006990.3	872.6	0.75	0.42	-4.23154	2.32095882374933e-05	0.000372229304729225	0.1	960	1033	1114	827	654	704	970.25	1020.27	1003.14	783.64	748	710.31	gene	protein_coding	1	1555895	1557716	-		SKI22_ARATH	F-box protein SKIP22	Q:1-1257	H:1-393	37.762	E:3.16e-56	Eukaryota; Viridiplantae; Streptophyta; Embryophyta; Tracheophyta; Spermatophyta; Magnoliopsida; eudicotyledons; Gunneridae; Pentapetalae; rosids; malvids; Brassicales; Brassicaceae; Camelineae; Arabidopsis	SKI22_ARATH	F-box protein SKIP22	Q:1-435	H:1-418	36.865	E:4.4e-59	Eukaryota; Viridiplantae; Streptophyta; Embryophyta; Tracheophyta; Spermatophyta; Magnoliopsida; eudicotyledons; Gunneridae; Pentapetalae; rosids; malvids; Brassicales; Brassicaceae; Camelineae; Arabidopsis	PF11543.9^UN_NPL4^Nuclear pore localisation protein NPL4^5-77^E:2.7e-05`PF00646.34^F-box^F-box domain^350-395^E:1.3e-07	.	GO:0005634^cellular_component^nucleus`GO:0016567^biological_process^protein ubiquitination	GO:0005634^cellular_component^nucleus`GO:0016567^biological_process^protein ubiquitination	GO:0005515^molecular_function^protein binding	KEGG:ath:AT1G23780`KO:K10293
Solyc03g111320.1	5275.5	0.6	0.73	-4.2309	2.32761497999487e-05	0.000372847120970475	0.17	5550	6416	8655	4257	3970	3309	5609.24	6336.94	7793.71	4033.83	4540.6	3338.66	gene	protein_coding	3	63417084	63419081	+	101261607	E70B1_ARATH	Exocyst complex component EXO70B1 {ECO:0000303|PubMed:23944713}	Q:19-1959	H:5-619	35.357	E:1.65e-119	Eukaryota; Viridiplantae; Streptophyta; Embryophyta; Tracheophyta; Spermatophyta; Magnoliopsida; eudicotyledons; Gunneridae; Pentapetalae; rosids; malvids; Brassicales; Brassicaceae; Camelineae; Arabidopsis	E70B1_ARATH	Exocyst complex component EXO70B1 {ECO:0000303|PubMed:23944713}	Q:7-653	H:5-619	36.544	E:7.31e-125	Eukaryota; Viridiplantae; Streptophyta; Embryophyta; Tracheophyta; Spermatophyta; Magnoliopsida; eudicotyledons; Gunneridae; Pentapetalae; rosids; malvids; Brassicales; Brassicaceae; Camelineae; Arabidopsis	PF03081.16^Exo70^Exo70 exocyst complex subunit^284-647^E:3.4e-127	.	GO:0005829^cellular_component^cytosol`GO:0012505^cellular_component^endomembrane system`GO:0000145^cellular_component^exocyst`GO:0070062^cellular_component^extracellular exosome`GO:0045335^cellular_component^phagocytic vesicle`GO:0005886^cellular_component^plasma membrane`GO:0006952^biological_process^defense response`GO:0052542^biological_process^defense response by callose deposition`GO:0042742…	GO:0005829^cellular_component^cytosol`GO:0012505^cellular_component^endomembrane system`GO:0000145^cellular_component^exocyst`GO:0070062^cellular_component^extracellular exosome`GO:0045335^cellular_component^phagocytic vesicle`GO:0005886^cellular_component^plasma membrane`GO:0006952^biological_process^defense response`GO:0052542^biological_process^defense response by callose deposition`GO:0042742…	GO:0006887^biological_process^exocytosis`GO:0000145^cellular_component^exocyst	KEGG:ath:AT5G58430
Solyc01g108640.1	27.97	3.97	-1.99	4.22989	2.3380255696699e-05	0.000374227528298697	0.47	10	14	11	66	36	30	10.11	13.83	9.91	62.54	41.17	30.27	gene	protein_coding	1	95777579	95778715	+	101264163	GDL9_ARATH	GDSL esterase/lipase At1g28600	Q:178-1008	H:84-358	35	E:6.34e-43	Eukaryota; Viridiplantae; Streptophyta; Embryophyta; Tracheophyta; Spermatophyta; Magnoliopsida; eudicotyledons; Gunneridae; Pentapetalae; rosids; malvids; Brassicales; Brassicaceae; Camelineae; Arabidopsis	GDL9_ARATH	GDSL esterase/lipase At1g28600	Q:58-336	H:82-358	34.752	E:2.72e-43	Eukaryota; Viridiplantae; Streptophyta; Embryophyta; Tracheophyta; Spermatophyta; Magnoliopsida; eudicotyledons; Gunneridae; Pentapetalae; rosids; malvids; Brassicales; Brassicaceae; Camelineae; Arabidopsis	PF00657.23^Lipase_GDSL^GDSL-like Lipase/Acylhydrolase^140-330^E:1.1e-13	.	GO:0005618^cellular_component^cell wall`GO:0005576^cellular_component^extracellular region`GO:0016788^molecular_function^hydrolase activity, acting on ester bonds`GO:0016042^biological_process^lipid catabolic process	GO:0005618^cellular_component^cell wall`GO:0005576^cellular_component^extracellular region`GO:0016788^molecular_function^hydrolase activity, acting on ester bonds`GO:0016042^biological_process^lipid catabolic process	GO:0016788^molecular_function^hydrolase activity, acting on ester bonds	KEGG:ath:AT1G28600
Solyc05g054330.3	3705.45	1.29	-0.37	4.22576	2.38138287191448e-05	0.000380875274349418	0.09	3246	3267	3537	4258	3923	3983	3280.65	3226.74	3185.02	4034.78	4486.84	4018.7	gene	protein_coding	5	65107443	65110303	-		HYES_HUMAN	Bifunctional epoxide hydrolase 2 {ECO:0000305}	Q:2-331	H:272-377	35.455	E:7e-19	Eukaryota; Metazoa; Chordata; Craniata; Vertebrata; Euteleostomi; Mammalia; Eutheria; Euarchontoglires; Primates; Haplorrhini; Catarrhini; Hominidae; Homo	HYES_HUMAN	Bifunctional epoxide hydrolase 2 {ECO:0000305}	Q:1-110	H:272-377	35.455	E:6.3e-19	Eukaryota; Metazoa; Chordata; Craniata; Vertebrata; Euteleostomi; Mammalia; Eutheria; Euarchontoglires; Primates; Haplorrhini; Catarrhini; Hominidae; Homo	PF00561.21^Abhydrolase_1^alpha/beta hydrolase fold^2-96^E:3.4e-14`PF12697.8^Abhydrolase_6^Alpha/beta hydrolase family^2-110^E:1.2e-11`PF12146.9^Hydrolase_4^Serine aminopeptidase, S33^5-93^E:6e-10	.	GO:0005829^cellular_component^cytosol`GO:0070062^cellular_component^extracellular exosome`GO:0005782^cellular_component^peroxisomal matrix`GO:0005777^cellular_component^peroxisome`GO:0033885^molecular_function^10-hydroxy-9-(phosphonooxy)octadecanoate phosphatase activity`GO:0004301^molecular_function^epoxide hydrolase activity`GO:0016787^molecular_function^hydrolase activity`GO:0042577^molecular_…	GO:0005829^cellular_component^cytosol`GO:0070062^cellular_component^extracellular exosome`GO:0005782^cellular_component^peroxisomal matrix`GO:0005777^cellular_component^peroxisome`GO:0033885^molecular_function^10-hydroxy-9-(phosphonooxy)octadecanoate phosphatase activity`GO:0004301^molecular_function^epoxide hydrolase activity`GO:0016787^molecular_function^hydrolase activity`GO:0042577^molecular_…	.	KEGG:hsa:2053`KO:K08726
Solyc01g098410.3	723.56	1.45	-0.53	4.22549	2.38416969920216e-05	0.000381029019615218	0.13	597	606	635	948	655	912	603.37	598.53	571.81	898.3	749.14	920.17	gene	protein_coding	1	88809375	88813347	+		CERK1_ARATH	Chitin elicitor receptor kinase 1	Q:204-731	H:31-213	46.196	E:5.26e-46	Eukaryota; Viridiplantae; Streptophyta; Embryophyta; Tracheophyta; Spermatophyta; Magnoliopsida; eudicotyledons; Gunneridae; Pentapetalae; rosids; malvids; Brassicales; Brassicaceae; Camelineae; Arabidopsis	CERK1_ARATH	Chitin elicitor receptor kinase 1	Q:11-210	H:11-213	44.231	E:3.41e-49	Eukaryota; Viridiplantae; Streptophyta; Embryophyta; Tracheophyta; Spermatophyta; Magnoliopsida; eudicotyledons; Gunneridae; Pentapetalae; rosids; malvids; Brassicales; Brassicaceae; Camelineae; Arabidopsis	.	.	GO:0016021^cellular_component^integral component of membrane`GO:0005886^cellular_component^plasma membrane`GO:0005524^molecular_function^ATP binding`GO:0008061^molecular_function^chitin binding`GO:2001080^molecular_function^chitosan binding`GO:0042802^molecular_function^identical protein binding`GO:0016301^molecular_function^kinase activity`GO:0042803^molecular_function^protein homodimerization a…	GO:0016021^cellular_component^integral component of membrane`GO:0005886^cellular_component^plasma membrane`GO:0005524^molecular_function^ATP binding`GO:0008061^molecular_function^chitin binding`GO:2001080^molecular_function^chitosan binding`GO:0042802^molecular_function^identical protein binding`GO:0016301^molecular_function^kinase activity`GO:0042803^molecular_function^protein homodimerization a…	.	KEGG:ath:AT3G21630`KO:K13429
Solyc11g005340.2	910.34	1.58	-0.66	4.22428	2.39704005819359e-05	0.000382792808681076	0.16	738	640	823	1019	1140	1064	745.88	632.11	741.1	965.58	1303.85	1073.54	gene	protein_coding	11	269286	273046	-		.	.	.	.	.	.	.	SYT10_HUMAN	Synaptotagmin-10	Q:61-126	H:123-193	31.081	E:0.72	Eukaryota; Metazoa; Chordata; Craniata; Vertebrata; Euteleostomi; Mammalia; Eutheria; Euarchontoglires; Primates; Haplorrhini; Catarrhini; Hominidae; Homo	.	.	.	GO:0070382^cellular_component^exocytic vesicle`GO:0016021^cellular_component^integral component of membrane`GO:0005886^cellular_component^plasma membrane`GO:0098793^cellular_component^presynapse`GO:0030658^cellular_component^transport vesicle membrane`GO:0005509^molecular_function^calcium ion binding`GO:0005544^molecular_function^calcium-dependent phospholipid binding`GO:0030276^molecular_functio…	.	KEGG:hsa:341359`KO:K19910
Solyc03g006080.3	761.81	0.6	0.74	-4.22223	2.41892772952097e-05	0.00038599281017249	0.17	963	933	1068	605	606	444	973.28	921.5	961.72	573.28	693.1	447.98	gene	protein_coding	3	758962	763436	+		Y3475_ARATH	Probable LRR receptor-like serine/threonine-protein kinase At3g47570	Q:3-1994	H:201-890	38.129	E:1.3e-120	Eukaryota; Viridiplantae; Streptophyta; Embryophyta; Tracheophyta; Spermatophyta; Magnoliopsida; eudicotyledons; Gunneridae; Pentapetalae; rosids; malvids; Brassicales; Brassicaceae; Camelineae; Arabidopsis`Y3475_ARATH	Y3475_ARATH	Probable LRR receptor-like serine/threonine-protein kinase At3g47570	Q:1-664	H:201-890	38.705	E:2.66e-136	Eukaryota; Viridiplantae; Streptophyta; Embryophyta; Tracheophyta; Spermatophyta; Magnoliopsida; eudicotyledons; Gunneridae; Pentapetalae; rosids; malvids; Brassicales; Brassicaceae; Camelineae; Arabidopsis`Y3475_ARATH	PF00560.34^LRR_1^Leucine Rich Repeat^12-23^E:5600`PF13516.7^LRR_6^Leucine Rich repeat^12-22^E:9200`PF00560.34^LRR_1^Leucine Rich Repeat^37-56^E:790`PF13855.7^LRR_8^Leucine rich repeat^60-121^E:1.4e-07`PF00560.34^LRR_1^Leucine Rich Repeat^62-84^E:6700`PF13516.7^LRR_6^Leucine Rich repeat^83-99^E:45`PF00560.34^LRR_1^Leucine Rich Repeat^86-106^E:0.2`PF00560.34^LRR_1^Leucine Rich Repeat^110-129^E:24`P…	.	GO:0016021^cellular_component^integral component of membrane`GO:0005886^cellular_component^plasma membrane`GO:0005524^molecular_function^ATP binding`GO:0004674^molecular_function^protein serine/threonine kinase activity	GO:0016021^cellular_component^integral component of membrane`GO:0005886^cellular_component^plasma membrane`GO:0005524^molecular_function^ATP binding`GO:0004674^molecular_function^protein serine/threonine kinase activity	GO:0005515^molecular_function^protein binding`GO:0004672^molecular_function^protein kinase activity`GO:0005524^molecular_function^ATP binding`GO:0006468^biological_process^protein phosphorylation	KEGG:ath:AT3G47570
Solyc06g066370.3	19169.5	0.43	1.23	-4.2201	2.4418945598537e-05	0.00038935999429539	0.29	22823	27763	33449	10170	15291	7219	23066.6	27420.9	30120.4	9636.84	17488.7	7283.7	gene	protein_coding	6	41788776	41791917	+		WRK33_ARATH	Probable WRKY transcription factor 33	Q:2-409	H:383-518	48.322	E:8.63e-27	Eukaryota; Viridiplantae; Streptophyta; Embryophyta; Tracheophyta; Spermatophyta; Magnoliopsida; eudicotyledons; Gunneridae; Pentapetalae; rosids; malvids; Brassicales; Brassicaceae; Camelineae; Arabidopsis`WRK33_ARATH	WRK33_ARATH	Probable WRKY transcription factor 33	Q:1-136	H:383-518	48.322	E:1.82e-28	Eukaryota; Viridiplantae; Streptophyta; Embryophyta; Tracheophyta; Spermatophyta; Magnoliopsida; eudicotyledons; Gunneridae; Pentapetalae; rosids; malvids; Brassicales; Brassicaceae; Camelineae; Arabidopsis`WRK33_ARATH	PF03106.16^WRKY^WRKY DNA -binding domain^1-37^E:2.5e-11	.	GO:0005634^cellular_component^nucleus`GO:0003700^molecular_function^DNA-binding transcription factor activity`GO:0046872^molecular_function^metal ion binding`GO:0043565^molecular_function^sequence-specific DNA binding`GO:0010120^biological_process^camalexin biosynthetic process`GO:0070370^biological_process^cellular heat acclimation`GO:0034605^biological_process^cellular response to heat`GO:00427…	GO:0005634^cellular_component^nucleus`GO:0003700^molecular_function^DNA-binding transcription factor activity`GO:0046872^molecular_function^metal ion binding`GO:0043565^molecular_function^sequence-specific DNA binding`GO:0010120^biological_process^camalexin biosynthetic process`GO:0070370^biological_process^cellular heat acclimation`GO:0034605^biological_process^cellular response to heat`GO:00427…	GO:0003700^molecular_function^DNA-binding transcription factor activity`GO:0043565^molecular_function^sequence-specific DNA binding`GO:0006355^biological_process^regulation of transcription, DNA-templated	KEGG:ath:AT2G38470`KO:K13424
Solyc06g060340.3	64717.7	1.32	-0.4	4.21971	2.44611742774607e-05	0.000389471130615412	0.09	59149	56081	57961	76133	61925	77283	59780.3	55390	52193.1	72141.8	70825.3	77975.6	gene	protein_coding	6	38438850	38440845	+	101260830	PSBS_TOBAC	Photosystem II 22 kDa protein, chloroplastic	Q:144-212	H:1-23	100	E:2.03e-06	Eukaryota; Viridiplantae; Streptophyta; Embryophyta; Tracheophyta; Spermatophyta; Magnoliopsida; eudicotyledons; Gunneridae; Pentapetalae; asterids; lamiids; Solanales; Solanaceae; Nicotianoideae; Nicotianeae; Nicotiana	.	.	.	.	.	.	.	.	.	GO:0009535^cellular_component^chloroplast thylakoid membrane`GO:0016021^cellular_component^integral component of membrane`GO:0009523^cellular_component^photosystem II`GO:0015979^biological_process^photosynthesis	.	.	KEGG:nta:107778533`KO:K03542
Solyc09g014610.3	121.1	0.27	1.89	-4.2197	2.44632355422003e-05	0.000389471130615412	0.45	325	113	147	55	31	66	328.47	111.61	132.37	52.12	35.46	66.59	gene	protein_coding	9	6258663	6261526	-		SLAH3_ARATH	S-type anion channel SLAH3	Q:4-771	H:241-496	76.562	E:7.33e-143	Eukaryota; Viridiplantae; Streptophyta; Embryophyta; Tracheophyta; Spermatophyta; Magnoliopsida; eudicotyledons; Gunneridae; Pentapetalae; rosids; malvids; Brassicales; Brassicaceae; Camelineae; Arabidopsis	SLAH3_ARATH	S-type anion channel SLAH3	Q:2-257	H:241-496	76.562	E:6.59e-143	Eukaryota; Viridiplantae; Streptophyta; Embryophyta; Tracheophyta; Spermatophyta; Magnoliopsida; eudicotyledons; Gunneridae; Pentapetalae; rosids; malvids; Brassicales; Brassicaceae; Camelineae; Arabidopsis	PF03595.18^SLAC1^Voltage-dependent anion channel^19-254^E:5.3e-37	.	GO:0016021^cellular_component^integral component of membrane`GO:0005886^cellular_component^plasma membrane`GO:0008308^molecular_function^voltage-gated anion channel activity`GO:0006873^biological_process^cellular ion homeostasis`GO:0006821^biological_process^chloride transport`GO:0009651^biological_process^response to salt stress`GO:0009414^biological_process^response to water deprivation	GO:0016021^cellular_component^integral component of membrane`GO:0005886^cellular_component^plasma membrane`GO:0008308^molecular_function^voltage-gated anion channel activity`GO:0006873^biological_process^cellular ion homeostasis`GO:0006821^biological_process^chloride transport`GO:0009651^biological_process^response to salt stress`GO:0009414^biological_process^response to water deprivation	GO:0055085^biological_process^transmembrane transport`GO:0016021^cellular_component^integral component of membrane	KEGG:ath:AT5G24030
Solyc10g079610.2	1335.44	1.32	-0.4	4.21831	2.46145477495106e-05	0.000391581433405324	0.1	1187	1115	1274	1620	1389	1428	1199.67	1101.26	1147.22	1535.07	1588.64	1440.8	gene	protein_coding	10	61246085	61249619	+	101244135	SSL10_ARATH	Protein STRICTOSIDINE SYNTHASE-LIKE 10 {ECO:0000303|PubMed:10777701}	Q:621-857	H:12-96	54.118	E:9.51e-22	Eukaryota; Viridiplantae; Streptophyta; Embryophyta; Tracheophyta; Spermatophyta; Magnoliopsida; eudicotyledons; Gunneridae; Pentapetalae; rosids; malvids; Brassicales; Brassicaceae; Camelineae; Arabidopsis	.	.	.	.	.	.	.	.	.	GO:0005829^cellular_component^cytosol`GO:0005783^cellular_component^endoplasmic reticulum`GO:0009505^cellular_component^plant-type cell wall`GO:0005886^cellular_component^plasma membrane`GO:0009506^cellular_component^plasmodesma`GO:0005773^cellular_component^vacuole`GO:0009058^biological_process^biosynthetic process	.	.	KEGG:ath:AT3G57030
Solyc04g025650.3	4456.16	0.22	2.16	-4.21696	2.47621566362627e-05	0.000393629652179798	0.51	5474	6987	10465	1368	2313	930	5532.42	6900.91	9423.59	1296.28	2645.44	938.33	gene	protein_coding	4	21290588	21295307	+	101260928	MO1_ARATH	Monooxygenase 1 {ECO:0000303|PubMed:10216258}	Q:72-497	H:246-397	47.368	E:4.54e-41	Eukaryota; Viridiplantae; Streptophyta; Embryophyta; Tracheophyta; Spermatophyta; Magnoliopsida; eudicotyledons; Gunneridae; Pentapetalae; rosids; malvids; Brassicales; Brassicaceae; Camelineae; Arabidopsis	MO1_ARATH	Monooxygenase 1 {ECO:0000303|PubMed:10216258}	Q:24-165	H:246-397	47.368	E:5.94e-42	Eukaryota; Viridiplantae; Streptophyta; Embryophyta; Tracheophyta; Spermatophyta; Magnoliopsida; eudicotyledons; Gunneridae; Pentapetalae; rosids; malvids; Brassicales; Brassicaceae; Camelineae; Arabidopsis	PF01494.20^FAD_binding_3^FAD binding domain^30-123^E:5.3e-11	.	GO:0005783^cellular_component^endoplasmic reticulum`GO:0071949^molecular_function^FAD binding`GO:0004497^molecular_function^monooxygenase activity`GO:0009620^biological_process^response to fungus	GO:0005783^cellular_component^endoplasmic reticulum`GO:0071949^molecular_function^FAD binding`GO:0004497^molecular_function^monooxygenase activity`GO:0009620^biological_process^response to fungus	GO:0071949^molecular_function^FAD binding	KEGG:ath:AT4G15760
Solyc10g086220.2	4575.77	1.37	-0.46	4.21672	2.47882107302754e-05	0.000393743937870859	0.11	3980	3806	4213	5698	5023	4693	4022.48	3759.1	3793.75	5399.28	5744.94	4735.06	gene	protein_coding	10	65243936	65245324	-	544239	OPR1_SOLLC	12-oxophytodienoate reductase 1	Q:3-767	H:122-376	100	E:0	Eukaryota; Viridiplantae; Streptophyta; Embryophyta; Tracheophyta; Spermatophyta; Magnoliopsida; eudicotyledons; Gunneridae; Pentapetalae; asterids; lamiids; Solanales; Solanaceae; Solanoideae; Solaneae; Solanum; Solanum subgen. Lycopersicon	OPR1_SOLLC	12-oxophytodienoate reductase 1	Q:1-255	H:122-376	100	E:0	Eukaryota; Viridiplantae; Streptophyta; Embryophyta; Tracheophyta; Spermatophyta; Magnoliopsida; eudicotyledons; Gunneridae; Pentapetalae; asterids; lamiids; Solanales; Solanaceae; Solanoideae; Solaneae; Solanum; Solanum subgen. Lycopersicon	PF00724.21^Oxidored_FMN^NADH:flavin oxidoreductase / NADH oxidase family^33-228^E:1.7e-58	.	GO:0005737^cellular_component^cytoplasm`GO:0016629^molecular_function^12-oxophytodienoate reductase activity`GO:0010181^molecular_function^FMN binding`GO:0016491^molecular_function^oxidoreductase activity`GO:0031408^biological_process^oxylipin biosynthetic process	GO:0005737^cellular_component^cytoplasm`GO:0016629^molecular_function^12-oxophytodienoate reductase activity`GO:0010181^molecular_function^FMN binding`GO:0016491^molecular_function^oxidoreductase activity`GO:0031408^biological_process^oxylipin biosynthetic process	GO:0010181^molecular_function^FMN binding`GO:0016491^molecular_function^oxidoreductase activity`GO:0055114^biological_process^oxidation-reduction process	KEGG:sly:544239`KO:K05894
Solyc03g111710.3	627.16	0.51	0.96	-4.2157	2.49001287801463e-05	0.000395220903345409	0.23	728	746	1123	364	486	375	735.77	736.81	1011.25	344.92	555.85	378.36	gene	protein_coding	3	63855417	63858784	+	101253881	BT2_ARATH	BTB/POZ and TAZ domain-containing protein 2	Q:740-805	H:32-53	59.091	E:7	Eukaryota; Viridiplantae; Streptophyta; Embryophyta; Tracheophyta; Spermatophyta; Magnoliopsida; eudicotyledons; Gunneridae; Pentapetalae; rosids; malvids; Brassicales; Brassicaceae; Camelineae; Arabidopsis	.	.	.	.	.	.	.	.	.	GO:0005737^cellular_component^cytoplasm`GO:0042025^cellular_component^host cell nucleus`GO:0005634^cellular_component^nucleus`GO:0005516^molecular_function^calmodulin binding`GO:0004402^molecular_function^histone acetyltransferase activity`GO:0003712^molecular_function^transcription coregulator activity`GO:0008270^molecular_function^zinc ion binding`GO:0009738^biological_process^abscisic acid-act…	.	.	KEGG:ath:AT3G48360
Solyc04g050440.3	837.52	1.78	-0.83	4.21448	2.50350351466285e-05	0.000397060223085434	0.2	719	560	588	1090	1135	877	726.67	553.1	529.49	1032.86	1298.13	884.86	gene	nontranslating_CDS	4	47168376	47171279	-		AMT12_SOLLC	Ammonium transporter 1 member 2	Q:3-1091	H:147-509	98.898	E:0	Eukaryota; Viridiplantae; Streptophyta; Embryophyta; Tracheophyta; Spermatophyta; Magnoliopsida; eudicotyledons; Gunneridae; Pentapetalae; asterids; lamiids; Solanales; Solanaceae; Solanoideae; Solaneae; Solanum; Solanum subgen. Lycopersicon	AMT12_SOLLC	Ammonium transporter 1 member 2	Q:1-368	H:147-514	98.913	E:0	Eukaryota; Viridiplantae; Streptophyta; Embryophyta; Tracheophyta; Spermatophyta; Magnoliopsida; eudicotyledons; Gunneridae; Pentapetalae; asterids; lamiids; Solanales; Solanaceae; Solanoideae; Solaneae; Solanum; Solanum subgen. Lycopersicon	PF00909.22^Ammonium_transp^Ammonium Transporter Family^1-330^E:5.5e-108	.	GO:0005887^cellular_component^integral component of plasma membrane`GO:0008519^molecular_function^ammonium transmembrane transporter activity`GO:0072488^biological_process^ammonium transmembrane transport`GO:0015696^biological_process^ammonium transport	GO:0005887^cellular_component^integral component of plasma membrane`GO:0008519^molecular_function^ammonium transmembrane transporter activity`GO:0072488^biological_process^ammonium transmembrane transport`GO:0015696^biological_process^ammonium transport	GO:0008519^molecular_function^ammonium transmembrane transporter activity`GO:0015696^biological_process^ammonium transport`GO:0016020^cellular_component^membrane	.
Solyc11g068390.1	29.75	0.09	3.43	-4.21347	2.51475391486067e-05	0.000398541713826665	0.81	42	59	69	2	12	0	42.45	58.27	62.13	1.9	13.72	0	gene	protein_coding	11	53433468	53433962	+		BIC1_ARATH	Protein BIC1 {ECO:0000303|PubMed:27846570}	Q:265-441	H:66-124	45.763	E:1.87e-13	Eukaryota; Viridiplantae; Streptophyta; Embryophyta; Tracheophyta; Spermatophyta; Magnoliopsida; eudicotyledons; Gunneridae; Pentapetalae; rosids; malvids; Brassicales; Brassicaceae; Camelineae; Arabidopsis	BIC1_ARATH	Protein BIC1 {ECO:0000303|PubMed:27846570}	Q:76-154	H:43-131	38.202	E:1.12e-14	Eukaryota; Viridiplantae; Streptophyta; Embryophyta; Tracheophyta; Spermatophyta; Magnoliopsida; eudicotyledons; Gunneridae; Pentapetalae; rosids; malvids; Brassicales; Brassicaceae; Camelineae; Arabidopsis	.	.	GO:0005634^cellular_component^nucleus`GO:0009785^biological_process^blue light signaling pathway`GO:0080167^biological_process^response to karrikin	GO:0005634^cellular_component^nucleus`GO:0009785^biological_process^blue light signaling pathway`GO:0080167^biological_process^response to karrikin	.	KEGG:ath:AT3G52740
Solyc12g010025.1	264.55	0.54	0.9	-4.21054	2.54762126226354e-05	0.000403444241168168	0.21	403	374	285	196	172	170	407.3	369.39	256.64	185.72	196.72	171.52	gene	protein_coding	12	3152336	3154912	-		AMPL1_SOLLC	Leucine aminopeptidase 1, chloroplastic	Q:1-405	H:72-206	100	E:2.77e-81	Eukaryota; Viridiplantae; Streptophyta; Embryophyta; Tracheophyta; Spermatophyta; Magnoliopsida; eudicotyledons; Gunneridae; Pentapetalae; asterids; lamiids; Solanales; Solanaceae; Solanoideae; Solaneae; Solanum; Solanum subgen. Lycopersicon	AMPL1_SOLLC	Leucine aminopeptidase 1, chloroplastic	Q:1-135	H:72-206	100	E:5.69e-86	Eukaryota; Viridiplantae; Streptophyta; Embryophyta; Tracheophyta; Spermatophyta; Magnoliopsida; eudicotyledons; Gunneridae; Pentapetalae; asterids; lamiids; Solanales; Solanaceae; Solanoideae; Solaneae; Solanum; Solanum subgen. Lycopersicon	PF02789.18^Peptidase_M17_N^Cytosol aminopeptidase family, N-terminal domain^22-134^E:2.9e-20	.	GO:0009507^cellular_component^chloroplast`GO:0004177^molecular_function^aminopeptidase activity`GO:0000287^molecular_function^magnesium ion binding`GO:0030145^molecular_function^manganese ion binding`GO:0008235^molecular_function^metalloexopeptidase activity`GO:0034214^biological_process^protein hexamerization	GO:0009507^cellular_component^chloroplast`GO:0004177^molecular_function^aminopeptidase activity`GO:0000287^molecular_function^magnesium ion binding`GO:0030145^molecular_function^manganese ion binding`GO:0008235^molecular_function^metalloexopeptidase activity`GO:0034214^biological_process^protein hexamerization	GO:0004177^molecular_function^aminopeptidase activity`GO:0006508^biological_process^proteolysis`GO:0005622^cellular_component^intracellular	KEGG:sly:544017`KO:K01255
Solyc02g071990.3	1095.23	0.64	0.64	-4.21001	2.55361647181479e-05	0.000404087058375423	0.15	1181	1307	1688	891	848	746	1193.6	1290.9	1520.02	844.29	969.88	752.69	gene	protein_coding	2	41879619	41886707	-	101250766	SH3Y1_XENLA	SH3 domain-containing YSC84-like protein 1	Q:1170-1039	H:147-190	38.636	E:1.3	Eukaryota; Metazoa; Chordata; Craniata; Vertebrata; Euteleostomi; Amphibia; Batrachia; Anura; Pipoidea; Pipidae; Xenopodinae; Xenopus; Xenopus	.	.	.	.	.	.	.	.	.	.	.	.	KEGG:xla:446367`KO:K20523
Solyc12g098230.1	299	1.77	-0.82	4.20789	2.57771604393761e-05	0.000407486344202502	0.2	206	181	289	412	372	328	208.2	178.77	260.24	390.4	425.47	330.94	gene	protein_coding	12	66815948	66819626	-		ANO8_MOUSE	Anoctamin-8	Q:98-9	H:315-344	43.333	E:6.5	Eukaryota; Metazoa; Chordata; Craniata; Vertebrata; Euteleostomi; Mammalia; Eutheria; Euarchontoglires; Glires; Rodentia; Myomorpha; Muroidea; Muridae; Murinae; Mus; Mus	.	.	.	.	.	.	.	.	.	GO:0016021^cellular_component^integral component of membrane`GO:0005886^cellular_component^plasma membrane`GO:0005229^molecular_function^intracellular calcium activated chloride channel activity`GO:0006821^biological_process^chloride transport`GO:0055085^biological_process^transmembrane transport	.	.	KEGG:mmu:382014`KO:K19502
Solyc02g084240.3	1132.62	1.45	-0.54	4.20777	2.57900278215554e-05	0.000407486344202502	0.13	912	916	1051	1618	1120	1198	921.73	904.71	946.41	1533.18	1280.97	1208.74	gene	protein_coding	2	47952694	47953856	+		H1_SOLPN	Histone H1	Q:1-414	H:55-192	98.551	E:1.88e-45	Eukaryota; Viridiplantae; Streptophyta; Embryophyta; Tracheophyta; Spermatophyta; Magnoliopsida; eudicotyledons; Gunneridae; Pentapetalae; asterids; lamiids; Solanales; Solanaceae; Solanoideae; Solaneae; Solanum; Solanum subgen. Lycopersicon	H1_SOLPN	Histone H1	Q:1-148	H:55-202	98.649	E:9.62e-95	Eukaryota; Viridiplantae; Streptophyta; Embryophyta; Tracheophyta; Spermatophyta; Magnoliopsida; eudicotyledons; Gunneridae; Pentapetalae; asterids; lamiids; Solanales; Solanaceae; Solanoideae; Solaneae; Solanum; Solanum subgen. Lycopersicon	PF00538.20^Linker_histone^linker histone H1 and H5 family^1-62^E:3.9e-11	.	GO:0042025^cellular_component^host cell nucleus`GO:0000786^cellular_component^nucleosome`GO:0005634^cellular_component^nucleus`GO:0003677^molecular_function^DNA binding`GO:0006334^biological_process^nucleosome assembly	GO:0042025^cellular_component^host cell nucleus`GO:0000786^cellular_component^nucleosome`GO:0005634^cellular_component^nucleus`GO:0003677^molecular_function^DNA binding`GO:0006334^biological_process^nucleosome assembly	GO:0003677^molecular_function^DNA binding`GO:0006334^biological_process^nucleosome assembly`GO:0000786^cellular_component^nucleosome`GO:0005634^cellular_component^nucleus	.
Solyc09g008200.3	2970.27	1.91	-0.93	4.20644	2.59423732113423e-05	0.000409289817279832	0.22	1722	1841	2854	4452	4005	2868	1740.38	1818.32	2569.99	4218.61	4580.63	2893.7	gene	protein_coding	9	1653017	1655519	-		HIP6_ARATH	Heavy metal-associated isoprenylated plant protein 6 {ECO:0000303|PubMed:21072340, ECO:0000303|PubMed:23368984}	Q:88-312	H:323-392	36.905	E:0.002	Eukaryota; Viridiplantae; Streptophyta; Embryophyta; Tracheophyta; Spermatophyta; Magnoliopsida; eudicotyledons; Gunneridae; Pentapetalae; rosids; malvids; Brassicales; Brassicaceae; Camelineae; Arabidopsis	HIP5_ARATH	Heavy metal-associated isoprenylated plant protein 5 {ECO:0000303|PubMed:21072340, ECO:0000303|PubMed:23368984}	Q:5-104	H:269-386	37.705	E:1.03e-07	Eukaryota; Viridiplantae; Streptophyta; Embryophyta; Tracheophyta; Spermatophyta; Magnoliopsida; eudicotyledons; Gunneridae; Pentapetalae; rosids; malvids; Brassicales; Brassicaceae; Camelineae; Arabidopsis	.	.	GO:0005886^cellular_component^plasma membrane`GO:0046872^molecular_function^metal ion binding`GO:0071456^biological_process^cellular response to hypoxia`GO:0030001^biological_process^metal ion transport	GO:0005507^molecular_function^copper ion binding`GO:0030001^biological_process^metal ion transport	.	KEGG:ath:AT2G36950
Solyc02g031790.2	225.78	0.55	0.87	-4.20643	2.59433896253937e-05	0.000409289817279832	0.21	269	265	379	195	145	128	271.87	261.73	341.28	184.78	165.84	129.15	gene	protein_coding	2	27477844	27481371	+		XA21_ORYSI	Receptor kinase-like protein Xa21 {ECO:0000303|Ref.1}	Q:3-2000	H:191-892	39.548	E:5.33e-143	Eukaryota; Viridiplantae; Streptophyta; Embryophyta; Tracheophyta; Spermatophyta; Magnoliopsida; Liliopsida; Poales; Poaceae; BOP clade; Oryzoideae; Oryzeae; Oryzinae; Oryza; Oryza sativa`XA21_ORYSI	XA21_ORYSI	Receptor kinase-like protein Xa21 {ECO:0000303|Ref.1}	Q:1-666	H:191-892	39.689	E:3.51e-147	Eukaryota; Viridiplantae; Streptophyta; Embryophyta; Tracheophyta; Spermatophyta; Magnoliopsida; Liliopsida; Poales; Poaceae; BOP clade; Oryzoideae; Oryzeae; Oryzinae; Oryza; Oryza sativa`XA21_ORYSI	PF13516.7^LRR_6^Leucine Rich repeat^10-24^E:280`PF00560.34^LRR_1^Leucine Rich Repeat^11-29^E:130`PF00560.34^LRR_1^Leucine Rich Repeat^36-52^E:2900`PF13516.7^LRR_6^Leucine Rich repeat^59-73^E:2500`PF00560.34^LRR_1^Leucine Rich Repeat^60-81^E:280`PF13516.7^LRR_6^Leucine Rich repeat^82-97^E:69`PF00560.34^LRR_1^Leucine Rich Repeat^84-106^E:180`PF00560.34^LRR_1^Leucine Rich Repeat^109-126^E:850`PF1351…	.	GO:0005789^cellular_component^endoplasmic reticulum membrane`GO:0016021^cellular_component^integral component of membrane`GO:0005634^cellular_component^nucleus`GO:0005886^cellular_component^plasma membrane`GO:0005524^molecular_function^ATP binding`GO:0004674^molecular_function^protein serine/threonine kinase activity`GO:0006952^biological_process^defense response`GO:0031349^biological_process^pos…	GO:0005789^cellular_component^endoplasmic reticulum membrane`GO:0016021^cellular_component^integral component of membrane`GO:0005634^cellular_component^nucleus`GO:0005886^cellular_component^plasma membrane`GO:0005524^molecular_function^ATP binding`GO:0004674^molecular_function^protein serine/threonine kinase activity`GO:0006952^biological_process^defense response`GO:0031349^biological_process^pos…	GO:0005515^molecular_function^protein binding`GO:0004672^molecular_function^protein kinase activity`GO:0005524^molecular_function^ATP binding`GO:0006468^biological_process^protein phosphorylation	.
Solyc12g017240.2	4055.95	0.15	2.73	-4.20625	2.59647723496787e-05	0.000409317770757171	0.65	5021	7018	10146	749	1703	531	5074.59	6931.53	9136.34	709.73	1947.77	535.76	gene	protein_coding	12	6426284	6427604	-	544101	XTH16_ARATH	Probable xyloglucan endotransglucosylase/hydrolase protein 16	Q:2-409	H:157-290	60.294	E:1.62e-50	Eukaryota; Viridiplantae; Streptophyta; Embryophyta; Tracheophyta; Spermatophyta; Magnoliopsida; eudicotyledons; Gunneridae; Pentapetalae; rosids; malvids; Brassicales; Brassicaceae; Camelineae; Arabidopsis	XTH16_ARATH	Probable xyloglucan endotransglucosylase/hydrolase protein 16	Q:1-136	H:157-290	60.294	E:4.34e-56	Eukaryota; Viridiplantae; Streptophyta; Embryophyta; Tracheophyta; Spermatophyta; Magnoliopsida; eudicotyledons; Gunneridae; Pentapetalae; rosids; malvids; Brassicales; Brassicaceae; Camelineae; Arabidopsis	PF00722.22^Glyco_hydro_16^Glycosyl hydrolases family 16^1-51^E:4.7e-13`PF06955.13^XET_C^Xyloglucan endo-transglycosylase (XET) C-terminus^89-132^E:3.2e-18	.	GO:0048046^cellular_component^apoplast`GO:0005618^cellular_component^cell wall`GO:0004553^molecular_function^hydrolase activity, hydrolyzing O-glycosyl compounds`GO:0016762^molecular_function^xyloglucan:xyloglucosyl transferase activity`GO:0042546^biological_process^cell wall biogenesis`GO:0071555^biological_process^cell wall organization`GO:0010411^biological_process^xyloglucan metabolic process	GO:0048046^cellular_component^apoplast`GO:0005618^cellular_component^cell wall`GO:0004553^molecular_function^hydrolase activity, hydrolyzing O-glycosyl compounds`GO:0016762^molecular_function^xyloglucan:xyloglucosyl transferase activity`GO:0042546^biological_process^cell wall biogenesis`GO:0071555^biological_process^cell wall organization`GO:0010411^biological_process^xyloglucan metabolic process	GO:0004553^molecular_function^hydrolase activity, hydrolyzing O-glycosyl compounds`GO:0005975^biological_process^carbohydrate metabolic process`GO:0016762^molecular_function^xyloglucan:xyloglucosyl transferase activity`GO:0006073^biological_process^cellular glucan metabolic process`GO:0005618^cellular_component^cell wall`GO:0048046^cellular_component^apoplast	KEGG:ath:AT3G23730`KO:K08235
Solyc09g005290.1	276.8	0.62	0.7	-4.20564	2.60349428757902e-05	0.000410114209587542	0.17	353	341	371	227	212	174	356.77	336.8	334.08	215.1	242.47	175.56	gene	protein_coding	9	220540	223350	+		RGA1_SOLBU	Putative disease resistance protein RGA1	Q:1-2565	H:1-781	34.758	E:4.11e-141	Eukaryota; Viridiplantae; Streptophyta; Embryophyta; Tracheophyta; Spermatophyta; Magnoliopsida; eudicotyledons; Gunneridae; Pentapetalae; asterids; lamiids; Solanales; Solanaceae; Solanoideae; Solaneae; Solanum	RGA1_SOLBU	Putative disease resistance protein RGA1	Q:1-911	H:1-828	34.056	E:2.81e-150	Eukaryota; Viridiplantae; Streptophyta; Embryophyta; Tracheophyta; Spermatophyta; Magnoliopsida; eudicotyledons; Gunneridae; Pentapetalae; asterids; lamiids; Solanales; Solanaceae; Solanoideae; Solaneae; Solanum`RGA1_SOLBU	PF18052.2^Rx_N^Rx N-terminal domain^5-98^E:2.4e-19`PF00931.23^NB-ARC^NB-ARC domain^197-418^E:8e-52`PF00560.34^LRR_1^Leucine Rich Repeat^433-451^E:520`PF13855.7^LRR_8^Leucine rich repeat^597-652^E:2.6e-06`PF00560.34^LRR_1^Leucine Rich Repeat^597-617^E:45`PF00560.34^LRR_1^Leucine Rich Repeat^619-637^E:780`PF00560.34^LRR_1^Leucine Rich Repeat^642-664^E:1.1`PF00560.34^LRR_1^Leucine Rich Repeat^773-78…	.	GO:0043531^molecular_function^ADP binding`GO:0005524^molecular_function^ATP binding`GO:0006952^biological_process^defense response	GO:0043531^molecular_function^ADP binding`GO:0005524^molecular_function^ATP binding`GO:0006952^biological_process^defense response	GO:0043531^molecular_function^ADP binding`GO:0005515^molecular_function^protein binding	.
Solyc01g107250.3	1150.04	0.65	0.63	-4.20398	2.6226299157613e-05	0.000412816980405505	0.15	1146	1422	1809	947	802	886	1158.23	1404.48	1628.98	897.35	917.27	893.94	gene	protein_coding	1	94757965	94760550	-	101244129	.	.	.	.	.	.	.	.	.	.	.	.	.	.	.	.	.	.	.	.
Solyc06g054010.3	935.88	1.36	-0.44	4.20328	2.63074227597949e-05	0.000413781859715478	0.1	753	801	922	1203	946	1002	761.04	791.13	830.25	1139.93	1081.97	1010.98	gene	protein_coding	6	36966775	36972044	+	100134913	IP5P7_ARATH	Type IV inositol polyphosphate 5-phosphatase 7 {ECO:0000303|PubMed:21677096}	Q:2-745	H:128-370	60.153	E:1.3e-83	Eukaryota; Viridiplantae; Streptophyta; Embryophyta; Tracheophyta; Spermatophyta; Magnoliopsida; eudicotyledons; Gunneridae; Pentapetalae; rosids; malvids; Brassicales; Brassicaceae; Camelineae; Arabidopsis	IP5P7_ARATH	Type IV inositol polyphosphate 5-phosphatase 7 {ECO:0000303|PubMed:21677096}	Q:1-248	H:128-370	65.217	E:4.75e-94	Eukaryota; Viridiplantae; Streptophyta; Embryophyta; Tracheophyta; Spermatophyta; Magnoliopsida; eudicotyledons; Gunneridae; Pentapetalae; rosids; malvids; Brassicales; Brassicaceae; Camelineae; Arabidopsis	.	.	GO:0005634^cellular_component^nucleus`GO:0005886^cellular_component^plasma membrane`GO:0034485^molecular_function^phosphatidylinositol-3,4,5-trisphosphate 5-phosphatase activity`GO:0004439^molecular_function^phosphatidylinositol-4,5-bisphosphate 5-phosphatase activity`GO:0071472^biological_process^cellular response to salt stress`GO:0010305^biological_process^leaf vascular tissue pattern formatio…	GO:0005634^cellular_component^nucleus`GO:0005886^cellular_component^plasma membrane`GO:0034485^molecular_function^phosphatidylinositol-3,4,5-trisphosphate 5-phosphatase activity`GO:0004439^molecular_function^phosphatidylinositol-4,5-bisphosphate 5-phosphatase activity`GO:0071472^biological_process^cellular response to salt stress`GO:0010305^biological_process^leaf vascular tissue pattern formatio…	.	KEGG:ath:AT2G32010
Solyc08g066800.3	7096.89	1.35	-0.43	4.20098	2.65764047045443e-05	0.000417697830567205	0.1	6067	5937	6802	9078	7492	7225	6131.75	5863.85	6125.11	8602.09	8568.81	7289.75	gene	protein_coding	8	55720314	55726297	+		PLDA1_RICCO	Phospholipase D alpha 1	Q:1-1860	H:32-652	77.134	E:0	Eukaryota; Viridiplantae; Streptophyta; Embryophyta; Tracheophyta; Spermatophyta; Magnoliopsida; eudicotyledons; Gunneridae; Pentapetalae; rosids; fabids; Malpighiales; Euphorbiaceae; Acalyphoideae; Acalypheae; Ricinus	PLDA1_RICCO	Phospholipase D alpha 1	Q:1-620	H:32-652	77.134	E:0	Eukaryota; Viridiplantae; Streptophyta; Embryophyta; Tracheophyta; Spermatophyta; Magnoliopsida; eudicotyledons; Gunneridae; Pentapetalae; rosids; fabids; Malpighiales; Euphorbiaceae; Acalyphoideae; Acalypheae; Ricinus	PF00168.31^C2^C2 domain^14-94^E:7.2e-11`PF00614.23^PLDc^Phospholipase D Active site motif^294-332^E:6.9e-11	.	GO:0005783^cellular_component^endoplasmic reticulum`GO:0005886^cellular_component^plasma membrane`GO:0009536^cellular_component^plastid`GO:0005773^cellular_component^vacuole`GO:0005509^molecular_function^calcium ion binding`GO:0070290^molecular_function^N-acylphosphatidylethanolamine-specific phospholipase D activity`GO:0004630^molecular_function^phospholipase D activity`GO:0016042^biological_pro…	GO:0005783^cellular_component^endoplasmic reticulum`GO:0005886^cellular_component^plasma membrane`GO:0009536^cellular_component^plastid`GO:0005773^cellular_component^vacuole`GO:0005509^molecular_function^calcium ion binding`GO:0070290^molecular_function^N-acylphosphatidylethanolamine-specific phospholipase D activity`GO:0004630^molecular_function^phospholipase D activity`GO:0016042^biological_pro…	GO:0003824^molecular_function^catalytic activity	KEGG:rcu:8282326`KO:K01115
Solyc01g010055.1	78.88	2.31	-1.21	4.20073	2.66054901017651e-05	0.000417840323103116	0.29	58	41	49	132	106	83	58.62	40.49	44.12	125.08	121.24	83.74	gene	protein_coding	1	4620999	4621970	+		XERC_PROMI	Tyrosine recombinase XerC {ECO:0000255|HAMAP-Rule:MF_01808}	Q:20-91	H:235-258	50	E:2.1	Bacteria; Proteobacteria; Gammaproteobacteria; Enterobacterales; Morganellaceae; Proteus	.	.	.	.	.	.	.	.	.	GO:0005737^cellular_component^cytoplasm`GO:0003677^molecular_function^DNA binding`GO:0009037^molecular_function^tyrosine-based site-specific recombinase activity`GO:0007049^biological_process^cell cycle`GO:0051301^biological_process^cell division`GO:0007059^biological_process^chromosome segregation`GO:0006313^biological_process^transposition, DNA-mediated	.	.	.
Solyc07g052250.3	501.17	1.45	-0.54	4.19802	2.6926403214439e-05	0.000422468235615916	0.13	437	376	458	598	555	575	441.66	371.37	412.42	566.65	634.77	580.15	gene	protein_coding	7	60865841	60867001	-		RL23_HELAH	50S ribosomal protein L23 {ECO:0000255|HAMAP-Rule:MF_01369}	Q:121-216	H:10-41	43.75	E:7.8	Bacteria; Proteobacteria; Epsilonproteobacteria; Campylobacterales; Helicobacteraceae; Helicobacter	.	.	.	.	.	.	.	.	COG0089^One of the early assembly proteins it binds 23S rRNA. One of the proteins that surrounds the polypeptide exit tunnel on the outside of the ribosome. Forms the main docking site for trigger factor binding to the ribosome (By similarity)	GO:0005840^cellular_component^ribosome`GO:0019843^molecular_function^rRNA binding`GO:0003735^molecular_function^structural constituent of ribosome`GO:0006412^biological_process^translation	.	.	KEGG:hac:Hac_0138`KO:K02892
Solyc05g015850.3	123.01	0.31	1.7	-4.1979	2.69406487928701e-05	0.000422468235615916	0.41	101	165	332	50	64	53	102.08	162.97	298.96	47.38	73.2	53.47	gene	protein_coding	5	12422417	12425099	-		WRK75_ARATH	Probable WRKY transcription factor 75	Q:370-468	H:54-86	100	E:6.13e-17	Eukaryota; Viridiplantae; Streptophyta; Embryophyta; Tracheophyta; Spermatophyta; Magnoliopsida; eudicotyledons; Gunneridae; Pentapetalae; rosids; malvids; Brassicales; Brassicaceae; Camelineae; Arabidopsis	WRK75_ARATH	Probable WRKY transcription factor 75	Q:81-113	H:54-86	100	E:6.9e-18	Eukaryota; Viridiplantae; Streptophyta; Embryophyta; Tracheophyta; Spermatophyta; Magnoliopsida; eudicotyledons; Gunneridae; Pentapetalae; rosids; malvids; Brassicales; Brassicaceae; Camelineae; Arabidopsis	PF03106.16^WRKY^WRKY DNA -binding domain^94-113^E:1e-06	.	GO:0005634^cellular_component^nucleus`GO:0003700^molecular_function^DNA-binding transcription factor activity`GO:0000978^molecular_function^RNA polymerase II cis-regulatory region sequence-specific DNA binding`GO:0010055^biological_process^atrichoblast differentiation`GO:0048527^biological_process^lateral root development`GO:0000122^biological_process^negative regulation of transcription by RNA p…	GO:0005634^cellular_component^nucleus`GO:0003700^molecular_function^DNA-binding transcription factor activity`GO:0000978^molecular_function^RNA polymerase II cis-regulatory region sequence-specific DNA binding`GO:0010055^biological_process^atrichoblast differentiation`GO:0048527^biological_process^lateral root development`GO:0000122^biological_process^negative regulation of transcription by RNA p…	GO:0003700^molecular_function^DNA-binding transcription factor activity`GO:0043565^molecular_function^sequence-specific DNA binding`GO:0006355^biological_process^regulation of transcription, DNA-templated	KEGG:ath:AT5G13080
Solyc01g104040.3	3124.38	0.79	0.34	-4.19376	2.74374031887947e-05	0.000429935044561954	0.08	3401	3617	3841	2941	2502	2606	3437.3	3572.43	3458.77	2786.82	2861.61	2629.35	gene	protein_coding	1	92397512	92420530	-		UGGG_ARATH	UDP-glucose:glycoprotein glucosyltransferase	Q:2-442	H:52-166	47.619	E:9.29e-36	Eukaryota; Viridiplantae; Streptophyta; Embryophyta; Tracheophyta; Spermatophyta; Magnoliopsida; eudicotyledons; Gunneridae; Pentapetalae; rosids; malvids; Brassicales; Brassicaceae; Camelineae; Arabidopsis	UGGG_ARATH	UDP-glucose:glycoprotein glucosyltransferase	Q:1-147	H:52-166	47.619	E:8.36e-36	Eukaryota; Viridiplantae; Streptophyta; Embryophyta; Tracheophyta; Spermatophyta; Magnoliopsida; eudicotyledons; Gunneridae; Pentapetalae; rosids; malvids; Brassicales; Brassicaceae; Camelineae; Arabidopsis	PF18400.2^Thioredoxin_12^Thioredoxin-like domain^1-146^E:1.4e-29	.	GO:0005783^cellular_component^endoplasmic reticulum`GO:0005788^cellular_component^endoplasmic reticulum lumen`GO:0005739^cellular_component^mitochondrion`GO:0003980^molecular_function^UDP-glucose:glycoprotein glucosyltransferase activity`GO:0051082^molecular_function^unfolded protein binding`GO:0046283^biological_process^anthocyanin-containing compound metabolic process`GO:0071712^biological_proc…	GO:0005783^cellular_component^endoplasmic reticulum`GO:0005788^cellular_component^endoplasmic reticulum lumen`GO:0005739^cellular_component^mitochondrion`GO:0003980^molecular_function^UDP-glucose:glycoprotein glucosyltransferase activity`GO:0051082^molecular_function^unfolded protein binding`GO:0046283^biological_process^anthocyanin-containing compound metabolic process`GO:0071712^biological_proc…	.	KEGG:ath:AT1G71220`KO:K11718
Solyc02g085870.3	9356.28	1.47	-0.56	4.19147	2.77147616309831e-05	0.000433955367413262	0.13	7518	7056	9035	12508	10575	9403	7598.24	6969.06	8135.9	11852.3	12094.9	9487.27	gene	protein_coding	2	49288588	49290622	+	101245220	KCS6_ARATH	3-ketoacyl-CoA synthase 6 {ECO:0000303|PubMed:18465198}	Q:1-1266	H:1-423	82.506	E:0	Eukaryota; Viridiplantae; Streptophyta; Embryophyta; Tracheophyta; Spermatophyta; Magnoliopsida; eudicotyledons; Gunneridae; Pentapetalae; rosids; malvids; Brassicales; Brassicaceae; Camelineae; Arabidopsis	KCS6_ARATH	3-ketoacyl-CoA synthase 6 {ECO:0000303|PubMed:18465198}	Q:1-422	H:1-423	82.506	E:0	Eukaryota; Viridiplantae; Streptophyta; Embryophyta; Tracheophyta; Spermatophyta; Magnoliopsida; eudicotyledons; Gunneridae; Pentapetalae; rosids; malvids; Brassicales; Brassicaceae; Camelineae; Arabidopsis	PF08392.13^FAE1_CUT1_RppA^FAE1/Type III polyketide synthase-like protein^80-368^E:1.6e-138	.	GO:0005783^cellular_component^endoplasmic reticulum`GO:0005789^cellular_component^endoplasmic reticulum membrane`GO:0016021^cellular_component^integral component of membrane`GO:0005739^cellular_component^mitochondrion`GO:0102336^molecular_function^3-oxo-arachidoyl-CoA synthase activity`GO:0102337^molecular_function^3-oxo-cerotoyl-CoA synthase activity`GO:0102338^molecular_function^3-oxo-lignocero…	GO:0005783^cellular_component^endoplasmic reticulum`GO:0005789^cellular_component^endoplasmic reticulum membrane`GO:0016021^cellular_component^integral component of membrane`GO:0005739^cellular_component^mitochondrion`GO:0102336^molecular_function^3-oxo-arachidoyl-CoA synthase activity`GO:0102337^molecular_function^3-oxo-cerotoyl-CoA synthase activity`GO:0102338^molecular_function^3-oxo-lignocero…	GO:0016747^molecular_function^transferase activity, transferring acyl groups other than amino-acyl groups`GO:0006633^biological_process^fatty acid biosynthetic process`GO:0016020^cellular_component^membrane	KEGG:ath:AT1G68530`KO:K15397
Solyc04g064810.3	1654.29	0.62	0.69	-4.19116	2.77533921544582e-05	0.000434234483544117	0.16	1669	2044	2686	1355	1206	1128	1686.81	2018.81	2418.71	1283.96	1379.34	1138.11	gene	protein_coding	4	55985987	55994188	+		Y2433_ARATH	Uncharacterized protein At2g24330	Q:3-86	H:322-349	78.571	E:9.17e-09	Eukaryota; Viridiplantae; Streptophyta; Embryophyta; Tracheophyta; Spermatophyta; Magnoliopsida; eudicotyledons; Gunneridae; Pentapetalae; rosids; malvids; Brassicales; Brassicaceae; Camelineae; Arabidopsis	.	.	.	.	.	.	.	.	.	GO:0005783^cellular_component^endoplasmic reticulum`GO:0071782^cellular_component^endoplasmic reticulum tubular network`GO:0071784^biological_process^endoplasmic reticulum cisternal network assembly`GO:0071786^biological_process^endoplasmic reticulum tubular network organization	.	.	KEGG:ath:AT2G24330
Solyc09g082190.1	53.35	2.65	-1.41	4.1869	2.82787999828209e-05	0.000442123680330665	0.34	37	33	20	75	72	78	37.39	32.59	18.01	71.07	82.35	78.7	gene	protein_coding	9	68422074	68422424	-	101246759	JOKA2_SOLTU	Protein JOKA2 {ECO:0000303|PubMed:26765567}	Q:19-114	H:446-474	40.625	E:2	Eukaryota; Viridiplantae; Streptophyta; Embryophyta; Tracheophyta; Spermatophyta; Magnoliopsida; eudicotyledons; Gunneridae; Pentapetalae; asterids; lamiids; Solanales; Solanaceae; Solanoideae; Solaneae; Solanum	YOOH_SCHPO	Putative xanthine/uracil permease C887.17	Q:38-82	H:77-131	32.727	E:2.9	Eukaryota; Fungi; Dikarya; Ascomycota; Taphrinomycotina; Schizosaccharomycetes; Schizosaccharomycetales; Schizosaccharomycetaceae; Schizosaccharomyces	PF07911.14^DUF1677^Protein of unknown function (DUF1677)^3-88^E:1.4e-35	.	GO:0005776^cellular_component^autophagosome`GO:0031410^cellular_component^cytoplasmic vesicle`GO:0008270^molecular_function^zinc ion binding`GO:0006914^biological_process^autophagy`GO:0050832^biological_process^defense response to fungus`GO:0015031^biological_process^protein transport	GO:0005794^cellular_component^Golgi apparatus`GO:0000139^cellular_component^Golgi membrane`GO:0016021^cellular_component^integral component of membrane`GO:0005886^cellular_component^plasma membrane`GO:0005345^molecular_function^purine nucleobase transmembrane transporter activity`GO:0022857^molecular_function^transmembrane transporter activity`GO:0015853^biological_process^adenine transport`GO:00…	.	KEGG:spo:SPBC887.17`KO:K06901
Solyc04g014530.1	184.5	2.66	-1.41	4.18314	2.87516301208745e-05	0.00044917965859498	0.34	143	88	79	201	318	248	144.53	86.92	71.14	190.46	363.71	250.22	gene	protein_coding	4	4802369	4803070	+	101267105	ERF92_ARATH	Ethylene-responsive transcription factor 1B	Q:316-579	H:78-165	70.455	E:2.03e-38	Eukaryota; Viridiplantae; Streptophyta; Embryophyta; Tracheophyta; Spermatophyta; Magnoliopsida; eudicotyledons; Gunneridae; Pentapetalae; rosids; malvids; Brassicales; Brassicaceae; Camelineae; Arabidopsis	ERFC3_SOLLC	Ethylene-response factor C3 {ECO:0000305}	Q:68-232	H:28-189	53.012	E:2.71e-49	Eukaryota; Viridiplantae; Streptophyta; Embryophyta; Tracheophyta; Spermatophyta; Magnoliopsida; eudicotyledons; Gunneridae; Pentapetalae; asterids; lamiids; Solanales; Solanaceae; Solanoideae; Solaneae; Solanum; Solanum subgen. Lycopersicon	PF00847.21^AP2^AP2 domain^109-159^E:1.2e-14	.	GO:0005634^cellular_component^nucleus`GO:0003677^molecular_function^DNA binding`GO:0003700^molecular_function^DNA-binding transcription factor activity`GO:0006952^biological_process^defense response`GO:0009873^biological_process^ethylene-activated signaling pathway`GO:0009867^biological_process^jasmonic acid mediated signaling pathway	GO:0005634^cellular_component^nucleus`GO:0003700^molecular_function^DNA-binding transcription factor activity`GO:0043565^molecular_function^sequence-specific DNA binding`GO:0006952^biological_process^defense response`GO:0009873^biological_process^ethylene-activated signaling pathway`GO:0045893^biological_process^positive regulation of transcription, DNA-templated`GO:0031347^biological_process^reg…	GO:0003700^molecular_function^DNA-binding transcription factor activity`GO:0006355^biological_process^regulation of transcription, DNA-templated	KEGG:sly:101247461`KO:K14516
Solyc04g079860.1	805.97	0.59	0.76	-4.18185	2.89145736597977e-05	0.000451387420663648	0.18	1137	1065	931	518	584	632	1149.14	1051.88	838.35	490.84	667.94	637.66	gene	protein_coding	4	64268575	64269606	-	101247911	GATL2_ARATH	Probable galacturonosyltransferase-like 2	Q:88-1017	H:26-336	74.441	E:3.36e-166	Eukaryota; Viridiplantae; Streptophyta; Embryophyta; Tracheophyta; Spermatophyta; Magnoliopsida; eudicotyledons; Gunneridae; Pentapetalae; rosids; malvids; Brassicales; Brassicaceae; Camelineae; Arabidopsis	GATL2_ARATH	Probable galacturonosyltransferase-like 2	Q:24-339	H:20-336	73.668	E:2.14e-179	Eukaryota; Viridiplantae; Streptophyta; Embryophyta; Tracheophyta; Spermatophyta; Magnoliopsida; eudicotyledons; Gunneridae; Pentapetalae; rosids; malvids; Brassicales; Brassicaceae; Camelineae; Arabidopsis	PF01501.21^Glyco_transf_8^Glycosyl transferase family 8^60-316^E:1.2e-46	.	GO:0005794^cellular_component^Golgi apparatus`GO:0000139^cellular_component^Golgi membrane`GO:0016021^cellular_component^integral component of membrane`GO:0047262^molecular_function^polygalacturonate 4-alpha-galacturonosyltransferase activity`GO:0071555^biological_process^cell wall organization`GO:0045489^biological_process^pectin biosynthetic process	GO:0005794^cellular_component^Golgi apparatus`GO:0000139^cellular_component^Golgi membrane`GO:0016021^cellular_component^integral component of membrane`GO:0047262^molecular_function^polygalacturonate 4-alpha-galacturonosyltransferase activity`GO:0071555^biological_process^cell wall organization`GO:0045489^biological_process^pectin biosynthetic process	GO:0016757^molecular_function^transferase activity, transferring glycosyl groups	KEGG:ath:AT3G50760
Solyc07g056600.1	63.64	0.14	2.85	-4.17994	2.91586752769155e-05	0.000454857900134364	0.68	54	135	163	7	31	5	54.58	133.34	146.78	6.63	35.46	5.04	gene	protein_coding	7	64543650	64543979	+	101248796	VQ10_ARATH	VQ motif-containing protein 10 {ECO:0000303|PubMed:22535423}	Q:13-315	H:11-107	40	E:6.54e-16	Eukaryota; Viridiplantae; Streptophyta; Embryophyta; Tracheophyta; Spermatophyta; Magnoliopsida; eudicotyledons; Gunneridae; Pentapetalae; rosids; malvids; Brassicales; Brassicaceae; Camelineae; Arabidopsis	VQ10_ARATH	VQ motif-containing protein 10 {ECO:0000303|PubMed:22535423}	Q:5-105	H:11-107	40.952	E:4.11e-19	Eukaryota; Viridiplantae; Streptophyta; Embryophyta; Tracheophyta; Spermatophyta; Magnoliopsida; eudicotyledons; Gunneridae; Pentapetalae; rosids; malvids; Brassicales; Brassicaceae; Camelineae; Arabidopsis	PF05678.15^VQ^VQ motif^10-36^E:2.5e-12	.	GO:0005634^cellular_component^nucleus`GO:0006979^biological_process^response to oxidative stress	GO:0005634^cellular_component^nucleus`GO:0006979^biological_process^response to oxidative stress	.	KEGG:ath:AT1G78410
Solyc06g073970.2	1164.85	1.49	-0.58	4.17853	2.93398572299547e-05	0.000457342419793588	0.14	1075	884	939	1577	1166	1344	1086.47	873.11	845.56	1494.33	1333.59	1356.04	gene	protein_coding	6	45861984	45864537	-		BC10_ORYSJ	Glycosyltransferase BC10 {ECO:0000305}	Q:269-598	H:85-197	29.825	E:1.84e-11	Eukaryota; Viridiplantae; Streptophyta; Embryophyta; Tracheophyta; Spermatophyta; Magnoliopsida; Liliopsida; Poales; Poaceae; BOP clade; Oryzoideae; Oryzeae; Oryzinae; Oryza; Oryza sativa	BC10_ORYSJ	Glycosyltransferase BC10 {ECO:0000305}	Q:90-199	H:85-197	29.825	E:1.91e-11	Eukaryota; Viridiplantae; Streptophyta; Embryophyta; Tracheophyta; Spermatophyta; Magnoliopsida; Liliopsida; Poales; Poaceae; BOP clade; Oryzoideae; Oryzeae; Oryzinae; Oryza; Oryza sativa	PF02485.22^Branch^Core-2/I-Branching enzyme^91-199^E:2.6e-27	.	GO:0000139^cellular_component^Golgi membrane`GO:0016021^cellular_component^integral component of membrane`GO:0016757^molecular_function^transferase activity, transferring glycosyl groups`GO:0030244^biological_process^cellulose biosynthetic process`GO:0009664^biological_process^plant-type cell wall organization	GO:0000139^cellular_component^Golgi membrane`GO:0016021^cellular_component^integral component of membrane`GO:0016757^molecular_function^transferase activity, transferring glycosyl groups`GO:0030244^biological_process^cellulose biosynthetic process`GO:0009664^biological_process^plant-type cell wall organization	GO:0008375^molecular_function^acetylglucosaminyltransferase activity`GO:0016020^cellular_component^membrane	KEGG:osa:4337935
Solyc07g032150.3	134.79	1.71	-0.78	4.17789	2.94226243740984e-05	0.000458290310400136	0.19	108	91	110	171	146	180	109.15	89.88	99.05	162.04	166.98	181.61	gene	protein_coding	7	35760769	35764410	+		OR5MA_HUMAN	Olfactory receptor 5M10	Q:243-55	H:222-290	30.435	E:6.7	Eukaryota; Metazoa; Chordata; Craniata; Vertebrata; Euteleostomi; Mammalia; Eutheria; Euarchontoglires; Primates; Haplorrhini; Catarrhini; Hominidae; Homo	.	.	.	.	.	.	.	.	.	GO:0016021^cellular_component^integral component of membrane`GO:0005886^cellular_component^plasma membrane`GO:0004930^molecular_function^G protein-coupled receptor activity`GO:0005549^molecular_function^odorant binding`GO:0004984^molecular_function^olfactory receptor activity`GO:0007186^biological_process^G protein-coupled receptor signaling pathway`GO:0007608^biological_process^sensory perceptio…	.	.	KEGG:hsa:390167`KO:K04257
Solyc07g005510.3	18375.7	1.33	-0.41	4.177	2.9538433300903e-05	0.000459456442186037	0.1	16632	16477	15878	21763	18029	21438	16809.5	16274	14297.9	20622.1	20620.3	21630.1	gene	protein_coding	7	400603	406327	+	101265653	FAD6C_BRANA	Omega-6 fatty acid desaturase, chloroplastic {ECO:0000303|PubMed:8066133}	Q:1-159	H:390-442	77.358	E:9.34e-23	Eukaryota; Viridiplantae; Streptophyta; Embryophyta; Tracheophyta; Spermatophyta; Magnoliopsida; eudicotyledons; Gunneridae; Pentapetalae; rosids; malvids; Brassicales; Brassicaceae; Brassiceae; Brassica	.	.	.	.	.	.	.	.	.	GO:0031969^cellular_component^chloroplast membrane`GO:0016491^molecular_function^oxidoreductase activity`GO:0006636^biological_process^unsaturated fatty acid biosynthetic process	.	.	.
Solyc02g091840.3	5212.81	1.42	-0.5	4.1768	2.9563530177072e-05	0.000459456442186037	0.12	4507	4300	4606	7221	5313	5360	4555.1	4247.02	4147.64	6842.44	6076.62	5408.04	gene	protein_coding	2	53708223	53728596	+	101248733	BAME1_ARATH	Leucine-rich repeat receptor-like serine/threonine-protein kinase BAM1	Q:261-2813	H:12-866	76.986	E:0	Eukaryota; Viridiplantae; Streptophyta; Embryophyta; Tracheophyta; Spermatophyta; Magnoliopsida; eudicotyledons; Gunneridae; Pentapetalae; rosids; malvids; Brassicales; Brassicaceae; Camelineae; Arabidopsis	BAME1_ARATH	Leucine-rich repeat receptor-like serine/threonine-protein kinase BAM1	Q:12-862	H:12-866	76.986	E:0	Eukaryota; Viridiplantae; Streptophyta; Embryophyta; Tracheophyta; Spermatophyta; Magnoliopsida; eudicotyledons; Gunneridae; Pentapetalae; rosids; malvids; Brassicales; Brassicaceae; Camelineae; Arabidopsis	PF08263.13^LRRNT_2^Leucine rich repeat N-terminal domain^25-63^E:8.6e-12`PF13516.7^LRR_6^Leucine Rich repeat^65-75^E:140`PF00560.34^LRR_1^Leucine Rich Repeat^69-89^E:3000`PF13516.7^LRR_6^Leucine Rich repeat^91-104^E:8600`PF13855.7^LRR_8^Leucine rich repeat^114-172^E:6.8e-08`PF13516.7^LRR_6^Leucine Rich repeat^114-124^E:710`PF00560.34^LRR_1^Leucine Rich Repeat^115-127^E:25`PF13516.7^LRR_6^Leucine …	.	GO:0016021^cellular_component^integral component of membrane`GO:0005886^cellular_component^plasma membrane`GO:0005524^molecular_function^ATP binding`GO:0042802^molecular_function^identical protein binding`GO:0043621^molecular_function^protein self-association`GO:0004674^molecular_function^protein serine/threonine kinase activity`GO:0033612^molecular_function^receptor serine/threonine kinase bindi…	GO:0016021^cellular_component^integral component of membrane`GO:0005886^cellular_component^plasma membrane`GO:0005524^molecular_function^ATP binding`GO:0042802^molecular_function^identical protein binding`GO:0043621^molecular_function^protein self-association`GO:0004674^molecular_function^protein serine/threonine kinase activity`GO:0033612^molecular_function^receptor serine/threonine kinase bindi…	GO:0005515^molecular_function^protein binding`GO:0004672^molecular_function^protein kinase activity`GO:0006468^biological_process^protein phosphorylation`GO:0005524^molecular_function^ATP binding	KEGG:ath:AT5G65700
Solyc03g006030.3	2177.34	1.31	-0.39	4.17697	2.95419640344406e-05	0.000459456442186037	0.09	1878	1942	2032	2602	2310	2290	1898.04	1918.07	1829.79	2465.59	2642.01	2310.52	gene	protein_coding	3	712185	716984	-		Y3475_ARATH	Probable LRR receptor-like serine/threonine-protein kinase At3g47570	Q:3-1991	H:201-890	36.592	E:1.2e-122	Eukaryota; Viridiplantae; Streptophyta; Embryophyta; Tracheophyta; Spermatophyta; Magnoliopsida; eudicotyledons; Gunneridae; Pentapetalae; rosids; malvids; Brassicales; Brassicaceae; Camelineae; Arabidopsis`Y3475_ARATH	Y3475_ARATH	Probable LRR receptor-like serine/threonine-protein kinase At3g47570	Q:1-663	H:201-890	38.095	E:2.12e-141	Eukaryota; Viridiplantae; Streptophyta; Embryophyta; Tracheophyta; Spermatophyta; Magnoliopsida; eudicotyledons; Gunneridae; Pentapetalae; rosids; malvids; Brassicales; Brassicaceae; Camelineae; Arabidopsis`Y3475_ARATH	PF00560.34^LRR_1^Leucine Rich Repeat^12-27^E:970`PF13516.7^LRR_6^Leucine Rich repeat^12-22^E:11000`PF13516.7^LRR_6^Leucine Rich repeat^41-48^E:6400`PF00560.34^LRR_1^Leucine Rich Repeat^60-83^E:6300`PF13516.7^LRR_6^Leucine Rich repeat^82-97^E:16`PF00560.34^LRR_1^Leucine Rich Repeat^85-105^E:0.96`PF13516.7^LRR_6^Leucine Rich repeat^107-121^E:1200`PF00560.34^LRR_1^Leucine Rich Repeat^109-125^E:1400`…	.	GO:0016021^cellular_component^integral component of membrane`GO:0005886^cellular_component^plasma membrane`GO:0005524^molecular_function^ATP binding`GO:0004674^molecular_function^protein serine/threonine kinase activity	GO:0016021^cellular_component^integral component of membrane`GO:0005886^cellular_component^plasma membrane`GO:0005524^molecular_function^ATP binding`GO:0004674^molecular_function^protein serine/threonine kinase activity	GO:0005515^molecular_function^protein binding`GO:0004672^molecular_function^protein kinase activity`GO:0005524^molecular_function^ATP binding`GO:0006468^biological_process^protein phosphorylation	KEGG:ath:AT3G47570
Solyc08g079180.3	15780.8	1.35	-0.43	4.17186	3.0212898217533e-05	0.000469199115771093	0.1	12605	13804	15486	17232	16494	19003	12739.5	13633.9	13944.9	16328.6	18864.6	19173.3	gene	protein_coding	8	62931245	62937370	-	101245683	EFGC_ARATH	Elongation factor G, chloroplastic {ECO:0000255|HAMAP-Rule:MF_03063}	Q:6-1415	H:88-557	91.489	E:0	Eukaryota; Viridiplantae; Streptophyta; Embryophyta; Tracheophyta; Spermatophyta; Magnoliopsida; eudicotyledons; Gunneridae; Pentapetalae; rosids; malvids; Brassicales; Brassicaceae; Camelineae; Arabidopsis	EFGC_ARATH	Elongation factor G, chloroplastic {ECO:0000255|HAMAP-Rule:MF_03063}	Q:2-471	H:88-557	91.489	E:0	Eukaryota; Viridiplantae; Streptophyta; Embryophyta; Tracheophyta; Spermatophyta; Magnoliopsida; eudicotyledons; Gunneridae; Pentapetalae; rosids; malvids; Brassicales; Brassicaceae; Camelineae; Arabidopsis	PF00009.28^GTP_EFTU^Elongation factor Tu GTP binding domain^9-281^E:1.6e-70`PF03144.26^GTP_EFTU_D2^Elongation factor Tu domain 2^324-390^E:8.5e-16`PF14492.7^EFG_III^Elongation Factor G, domain III^404-471^E:1e-28	.	GO:0048046^cellular_component^apoplast`GO:0009507^cellular_component^chloroplast`GO:0009941^cellular_component^chloroplast envelope`GO:0009570^cellular_component^chloroplast stroma`GO:0005739^cellular_component^mitochondrion`GO:0005634^cellular_component^nucleus`GO:0005524^molecular_function^ATP binding`GO:0005525^molecular_function^GTP binding`GO:0003924^molecular_function^GTPase activity`GO:000…	GO:0048046^cellular_component^apoplast`GO:0009507^cellular_component^chloroplast`GO:0009941^cellular_component^chloroplast envelope`GO:0009570^cellular_component^chloroplast stroma`GO:0005739^cellular_component^mitochondrion`GO:0005634^cellular_component^nucleus`GO:0005524^molecular_function^ATP binding`GO:0005525^molecular_function^GTP binding`GO:0003924^molecular_function^GTPase activity`GO:000…	GO:0003924^molecular_function^GTPase activity`GO:0005525^molecular_function^GTP binding	KEGG:ath:AT1G62750`KO:K02355
Solyc06g063210.3	913.22	0.41	1.28	-4.16874	3.06292343271474e-05	0.000475311062361503	0.31	1376	1153	1504	660	610	270	1390.69	1138.79	1354.33	625.4	697.67	272.42	gene	protein_coding	6	40035721	40046275	+		GLR22_ARATH	Glutamate receptor 2.2	Q:3-1337	H:89-526	43.75	E:1.83e-122	Eukaryota; Viridiplantae; Streptophyta; Embryophyta; Tracheophyta; Spermatophyta; Magnoliopsida; eudicotyledons; Gunneridae; Pentapetalae; rosids; malvids; Brassicales; Brassicaceae; Camelineae; Arabidopsis	GLR22_ARATH	Glutamate receptor 2.2	Q:1-445	H:89-526	43.75	E:1.65e-122	Eukaryota; Viridiplantae; Streptophyta; Embryophyta; Tracheophyta; Spermatophyta; Magnoliopsida; eudicotyledons; Gunneridae; Pentapetalae; rosids; malvids; Brassicales; Brassicaceae; Camelineae; Arabidopsis	PF01094.29^ANF_receptor^Receptor family ligand binding region^5-314^E:1.7e-49`PF13458.7^Peripla_BP_6^Periplasmic binding protein^8-249^E:1.5e-13	.	GO:0016021^cellular_component^integral component of membrane`GO:0005886^cellular_component^plasma membrane`GO:0005262^molecular_function^calcium channel activity`GO:0008066^molecular_function^glutamate receptor activity`GO:0015276^molecular_function^ligand-gated ion channel activity`GO:0038023^molecular_function^signaling receptor activity`GO:0006816^biological_process^calcium ion transport`GO:00…	GO:0016021^cellular_component^integral component of membrane`GO:0005886^cellular_component^plasma membrane`GO:0005262^molecular_function^calcium channel activity`GO:0008066^molecular_function^glutamate receptor activity`GO:0015276^molecular_function^ligand-gated ion channel activity`GO:0038023^molecular_function^signaling receptor activity`GO:0006816^biological_process^calcium ion transport`GO:00…	.	KEGG:ath:AT2G24720`KO:K05387
Solyc07g055560.3	827.62	1.89	-0.92	4.16752	3.07930226501195e-05	0.000477497747959356	0.22	602	448	743	1138	1154	840	608.43	442.48	669.06	1078.34	1319.86	847.53	gene	protein_coding	7	63677617	63685265	+		EP1L2_ARATH	EP1-like glycoprotein 2 {ECO:0000305}	Q:141-434	H:92-191	49	E:1.77e-21	Eukaryota; Viridiplantae; Streptophyta; Embryophyta; Tracheophyta; Spermatophyta; Magnoliopsida; eudicotyledons; Gunneridae; Pentapetalae; rosids; malvids; Brassicales; Brassicaceae; Camelineae; Arabidopsis	EP1L2_ARATH	EP1-like glycoprotein 2 {ECO:0000305}	Q:47-144	H:92-191	49	E:1.59e-21	Eukaryota; Viridiplantae; Streptophyta; Embryophyta; Tracheophyta; Spermatophyta; Magnoliopsida; eudicotyledons; Gunneridae; Pentapetalae; rosids; malvids; Brassicales; Brassicaceae; Camelineae; Arabidopsis	PF01453.25^B_lectin^D-mannose binding lectin^48-131^E:2.2e-16	.	GO:0048046^cellular_component^apoplast`GO:0005618^cellular_component^cell wall`GO:0005794^cellular_component^Golgi apparatus`GO:0005739^cellular_component^mitochondrion`GO:0009505^cellular_component^plant-type cell wall`GO:0005886^cellular_component^plasma membrane`GO:0009506^cellular_component^plasmodesma`GO:0099503^cellular_component^secretory vesicle`GO:0030246^molecular_function^carbohydrate …	GO:0048046^cellular_component^apoplast`GO:0005618^cellular_component^cell wall`GO:0005794^cellular_component^Golgi apparatus`GO:0005739^cellular_component^mitochondrion`GO:0009505^cellular_component^plant-type cell wall`GO:0005886^cellular_component^plasma membrane`GO:0009506^cellular_component^plasmodesma`GO:0099503^cellular_component^secretory vesicle`GO:0030246^molecular_function^carbohydrate …	.	KEGG:ath:AT1G78830
Solyc02g080850.1	15.01	0.08	3.73	-4.1669	3.08769056198402e-05	0.000478443039418934	0.9	17	17	55	1	4	1	17.18	16.79	49.53	0.95	4.57	1.01	gene	protein_coding	2	45520233	45521501	+	101248538	FB333_ARATH	Probable F-box protein At4g22030	Q:1-1227	H:1-402	48.21	E:2.01e-113	Eukaryota; Viridiplantae; Streptophyta; Embryophyta; Tracheophyta; Spermatophyta; Magnoliopsida; eudicotyledons; Gunneridae; Pentapetalae; rosids; malvids; Brassicales; Brassicaceae; Camelineae; Arabidopsis	FB333_ARATH	Probable F-box protein At4g22030	Q:1-409	H:1-402	48.571	E:1.03e-117	Eukaryota; Viridiplantae; Streptophyta; Embryophyta; Tracheophyta; Spermatophyta; Magnoliopsida; eudicotyledons; Gunneridae; Pentapetalae; rosids; malvids; Brassicales; Brassicaceae; Camelineae; Arabidopsis	PF14476.7^Chloroplast_duf^Petal formation-expressed^88-401^E:1.4e-153	.	.	.	.	.
Solyc12g056210.2	2643.39	0.77	0.38	-4.16611	3.09834615184957e-05	0.000479737988734452	0.09	2837	2965	3531	2384	2103	2201	2867.28	2928.47	3179.62	2259.02	2405.26	2220.73	gene	protein_coding	12	63118945	63124345	-		.	.	.	.	.	.	.	.	.	.	.	.	.	.	.	.	.	.	.	.
Solyc08g068790.2	278.42	0.33	1.62	-4.1658	3.1025904897033e-05	0.000480039056346089	0.39	362	411	542	78	208	98	365.86	405.94	488.06	73.91	237.9	98.88	gene	protein_coding	8	57968454	57969182	+		THT11_TOBAC	Tyramine N-feruloyltransferase 4/11	Q:3-509	H:50-221	76.744	E:1.39e-88	Eukaryota; Viridiplantae; Streptophyta; Embryophyta; Tracheophyta; Spermatophyta; Magnoliopsida; eudicotyledons; Gunneridae; Pentapetalae; asterids; lamiids; Solanales; Solanaceae; Nicotianoideae; Nicotianeae; Nicotiana	THT11_TOBAC	Tyramine N-feruloyltransferase 4/11	Q:1-169	H:50-221	76.744	E:1.81e-88	Eukaryota; Viridiplantae; Streptophyta; Embryophyta; Tracheophyta; Spermatophyta; Magnoliopsida; eudicotyledons; Gunneridae; Pentapetalae; asterids; lamiids; Solanales; Solanaceae; Nicotianoideae; Nicotianeae; Nicotiana	PF00583.26^Acetyltransf_1^Acetyltransferase (GNAT) family^70-144^E:4.2e-06	.	GO:0005737^cellular_component^cytoplasm`GO:0008080^molecular_function^N-acetyltransferase activity`GO:0050366^molecular_function^tyramine N-feruloyltransferase activity	GO:0005737^cellular_component^cytoplasm`GO:0008080^molecular_function^N-acetyltransferase activity`GO:0050366^molecular_function^tyramine N-feruloyltransferase activity	.	KEGG:nta:107822189`KO:K22246
Solyc01g088810.3	125.37	0.51	0.97	-4.16535	3.10871136042071e-05	0.000480629803812601	0.23	148	149	223	99	78	71	149.58	147.16	200.81	93.81	89.21	71.64	gene	protein_coding	1	83416773	83419192	+	101246387	CFTR_SAIBB	Cystic fibrosis transmembrane conductance regulator	Q:232-360	H:1077-1120	38.636	E:7.6	Eukaryota; Metazoa; Chordata; Craniata; Vertebrata; Euteleostomi; Mammalia; Eutheria; Euarchontoglires; Primates; Haplorrhini; Platyrrhini; Cebidae; Saimiriinae; Saimiri	CFTR_OTOGA	Cystic fibrosis transmembrane conductance regulator	Q:97-146	H:1098-1140	44	E:2	Eukaryota; Metazoa; Chordata; Craniata; Vertebrata; Euteleostomi; Mammalia; Eutheria; Euarchontoglires; Primates; Strepsirrhini; Lorisiformes; Galagidae; Otolemur	PF13962.7^PGG^Domain of unknown function^25-121^E:5.4e-12	.	GO:0016324^cellular_component^apical plasma membrane`GO:0009986^cellular_component^cell surface`GO:0034707^cellular_component^chloride channel complex`GO:0005829^cellular_component^cytosol`GO:0005769^cellular_component^early endosome`GO:0031901^cellular_component^early endosome membrane`GO:0005789^cellular_component^endoplasmic reticulum membrane`GO:0016021^cellular_component^integral component o…	GO:0016324^cellular_component^apical plasma membrane`GO:0034707^cellular_component^chloride channel complex`GO:0005769^cellular_component^early endosome`GO:0031901^cellular_component^early endosome membrane`GO:0005789^cellular_component^endoplasmic reticulum membrane`GO:0016021^cellular_component^integral component of membrane`GO:0005887^cellular_component^integral component of plasma membrane`GO…	.	KEGG:sbq:101036459`KO:K05031
Solyc09g074290.1	27.62	0.16	2.61	-4.16506	3.11274305203254e-05	0.00048089691326442	0.63	22	47	82	13	6	4	22.23	46.42	73.84	12.32	6.86	4.04	gene	protein_coding	9	66507817	66509241	-	101261551	VPYL_MEDTR	Protein VAPYRIN-LIKE {ECO:0000303|PubMed:19912567}	Q:1-1332	H:1-441	50	E:3.54e-155	Eukaryota; Viridiplantae; Streptophyta; Embryophyta; Tracheophyta; Spermatophyta; Magnoliopsida; eudicotyledons; Gunneridae; Pentapetalae; rosids; fabids; Fabales; Fabaceae; Papilionoideae; 50 kb inversion clade; NPAAA clade; Hologalegina; IRL clade; Trifolieae; Medicago	VPYL_MEDTR	Protein VAPYRIN-LIKE {ECO:0000303|PubMed:19912567}	Q:1-444	H:1-441	50	E:3.71e-155	Eukaryota; Viridiplantae; Streptophyta; Embryophyta; Tracheophyta; Spermatophyta; Magnoliopsida; eudicotyledons; Gunneridae; Pentapetalae; rosids; fabids; Fabales; Fabaceae; Papilionoideae; 50 kb inversion clade; NPAAA clade; Hologalegina; IRL clade; Trifolieae; Medicago	PF13637.7^Ank_4^Ankyrin repeats (many copies)^160-211^E:2.2e-06`PF12796.8^Ank_2^Ankyrin repeats (3 copies)^164-249^E:1.5e-10`PF00023.31^Ank^Ankyrin repeat^164-188^E:0.0029`PF12796.8^Ank_2^Ankyrin repeats (3 copies)^196-284^E:2.4e-12`PF13637.7^Ank_4^Ankyrin repeats (many copies)^224-276^E:7.5e-11`PF13857.7^Ank_5^Ankyrin repeats (many copies)^247-296^E:2e-09`PF00023.31^Ank^Ankyrin repeat^256-286^E:…	.	GO:0005737^cellular_component^cytoplasm`GO:0005634^cellular_component^nucleus`GO:0005886^cellular_component^plasma membrane	GO:0005737^cellular_component^cytoplasm`GO:0005634^cellular_component^nucleus`GO:0005886^cellular_component^plasma membrane	GO:0005515^molecular_function^protein binding	KEGG:mtr:MTR_1g089180
Solyc08g079740.3	598.05	1.66	-0.73	4.164	3.12722243793481e-05	0.000482776529027924	0.18	520	461	408	848	567	781	525.55	455.32	367.4	803.54	648.49	788	gene	protein_coding	8	63352480	63356143	+	101257791	Y1124_ARATH	Probable LRR receptor-like serine/threonine-protein kinase At1g12460	Q:2-1480	H:386-882	68.675	E:0	Eukaryota; Viridiplantae; Streptophyta; Embryophyta; Tracheophyta; Spermatophyta; Magnoliopsida; eudicotyledons; Gunneridae; Pentapetalae; rosids; malvids; Brassicales; Brassicaceae; Camelineae; Arabidopsis`Y1124_ARATH	Y1124_ARATH	Probable LRR receptor-like serine/threonine-protein kinase At1g12460	Q:1-493	H:386-882	68.675	E:0	Eukaryota; Viridiplantae; Streptophyta; Embryophyta; Tracheophyta; Spermatophyta; Magnoliopsida; eudicotyledons; Gunneridae; Pentapetalae; rosids; malvids; Brassicales; Brassicaceae; Camelineae; Arabidopsis`Y1124_ARATH	PF00560.34^LRR_1^Leucine Rich Repeat^1-18^E:2100`PF13855.7^LRR_8^Leucine rich repeat^19-79^E:3.6e-07`PF00560.34^LRR_1^Leucine Rich Repeat^20-42^E:3.3`PF00560.34^LRR_1^Leucine Rich Repeat^44-62^E:24`PF00560.34^LRR_1^Leucine Rich Repeat^68-84^E:73`PF00069.26^Pkinase^Protein kinase domain^208-423^E:2e-33`PF07714.18^PK_Tyr_Ser-Thr^Protein tyrosine and serine/threonine kinase^209-483^E:5.7e-34	.	GO:0016021^cellular_component^integral component of membrane`GO:0016020^cellular_component^membrane`GO:0005886^cellular_component^plasma membrane`GO:0005524^molecular_function^ATP binding`GO:0004674^molecular_function^protein serine/threonine kinase activity	GO:0016021^cellular_component^integral component of membrane`GO:0016020^cellular_component^membrane`GO:0005886^cellular_component^plasma membrane`GO:0005524^molecular_function^ATP binding`GO:0004674^molecular_function^protein serine/threonine kinase activity	GO:0005515^molecular_function^protein binding`GO:0004672^molecular_function^protein kinase activity`GO:0005524^molecular_function^ATP binding`GO:0006468^biological_process^protein phosphorylation	KEGG:ath:AT1G12460
Solyc03g082530.1	710.49	0.17	2.58	-4.16203	3.15425172582177e-05	0.000486589371924258	0.62	898	1255	1672	114	335	118	907.58	1239.54	1505.61	108.02	383.15	119.06	gene	protein_coding	3	53889170	53889538	-		SAU32_ARATH	Auxin-responsive protein SAUR32 {ECO:0000305}	Q:112-309	H:24-90	64.179	E:9.59e-25	Eukaryota; Viridiplantae; Streptophyta; Embryophyta; Tracheophyta; Spermatophyta; Magnoliopsida; eudicotyledons; Gunneridae; Pentapetalae; rosids; malvids; Brassicales; Brassicaceae; Camelineae; Arabidopsis	SAU32_ARATH	Auxin-responsive protein SAUR32 {ECO:0000305}	Q:19-118	H:8-121	47.458	E:8.74e-28	Eukaryota; Viridiplantae; Streptophyta; Embryophyta; Tracheophyta; Spermatophyta; Magnoliopsida; eudicotyledons; Gunneridae; Pentapetalae; rosids; malvids; Brassicales; Brassicaceae; Camelineae; Arabidopsis	PF02519.15^Auxin_inducible^Auxin responsive protein^32-99^E:2.8e-20	.	GO:0005737^cellular_component^cytoplasm`GO:0005634^cellular_component^nucleus`GO:0009734^biological_process^auxin-activated signaling pathway`GO:0007275^biological_process^multicellular organism development`GO:0040008^biological_process^regulation of growth`GO:1900140^biological_process^regulation of seedling development	GO:0005737^cellular_component^cytoplasm`GO:0005634^cellular_component^nucleus`GO:0009734^biological_process^auxin-activated signaling pathway`GO:0007275^biological_process^multicellular organism development`GO:0040008^biological_process^regulation of growth`GO:1900140^biological_process^regulation of seedling development	GO:0009733^biological_process^response to auxin	KEGG:ath:AT2G46690`KO:K14488
Solyc11g009000.2	338	1.54	-0.62	4.16011	3.18100608396725e-05	0.000490354202249368	0.15	298	243	287	464	342	394	301.18	240.01	258.44	439.67	391.15	397.53	gene	protein_coding	11	3150939	3158675	+		Y2734_MYCBO	Uncharacterized protein Mb2734	Q:371-748	H:38-162	34.109	E:7.36e-13	Bacteria; Actinobacteria; Corynebacteriales; Mycobacteriaceae; Mycobacterium; Mycobacterium tuberculosis complex	Y2734_MYCBO	Uncharacterized protein Mb2734	Q:52-177	H:38-162	34.109	E:2.03e-13	Bacteria; Actinobacteria; Corynebacteriales; Mycobacteriaceae; Mycobacterium; Mycobacterium tuberculosis complex	PF00561.21^Abhydrolase_1^alpha/beta hydrolase fold^52-151^E:1.8e-14`PF12697.8^Abhydrolase_6^Alpha/beta hydrolase family^54-153^E:8.6e-07	.	GO:0016787^molecular_function^hydrolase activity	GO:0016787^molecular_function^hydrolase activity	.	.
Solyc02g077040.3	11705	0.44	1.19	-4.15952	3.18912372450612e-05	0.000491242733416175	0.29	13718	15930	21309	6953	9132	4371	13864.4	15733.7	19188.5	6588.49	10444.5	4410.17	gene	protein_coding	2	42680237	42687280	+		SAG39_ORYSJ	Senescence-specific cysteine protease SAG39 {ECO:0000305}	Q:361-771	H:7-144	42.657	E:1.13e-29	Eukaryota; Viridiplantae; Streptophyta; Embryophyta; Tracheophyta; Spermatophyta; Magnoliopsida; Liliopsida; Poales; Poaceae; BOP clade; Oryzoideae; Oryzeae; Oryzinae; Oryza; Oryza sativa	SAG39_ORYSJ	Senescence-specific cysteine protease SAG39 {ECO:0000305}	Q:15-151	H:7-144	42.657	E:3.71e-31	Eukaryota; Viridiplantae; Streptophyta; Embryophyta; Tracheophyta; Spermatophyta; Magnoliopsida; Liliopsida; Poales; Poaceae; BOP clade; Oryzoideae; Oryzeae; Oryzinae; Oryza; Oryza sativa	PF08246.13^Inhibitor_I29^Cathepsin propeptide inhibitor domain (I29)^41-98^E:6.2e-18	.	GO:0005615^cellular_component^extracellular space`GO:0005764^cellular_component^lysosome`GO:0010282^cellular_component^senescence-associated vacuole`GO:0004197^molecular_function^cysteine-type endopeptidase activity`GO:0007568^biological_process^aging`GO:0010150^biological_process^leaf senescence`GO:0010623^biological_process^programmed cell death involved in cell development`GO:0051603^biologica…	GO:0005615^cellular_component^extracellular space`GO:0005764^cellular_component^lysosome`GO:0010282^cellular_component^senescence-associated vacuole`GO:0004197^molecular_function^cysteine-type endopeptidase activity`GO:0007568^biological_process^aging`GO:0010150^biological_process^leaf senescence`GO:0010623^biological_process^programmed cell death involved in cell development`GO:0051603^biologica…	.	KEGG:osa:107276017
Solyc02g093620.1	2515.54	1.33	-0.41	4.15909	3.19522883988627e-05	0.000491820179543556	0.1	2084	2160	2481	3270	2320	2842	2106.24	2133.38	2234.11	3098.57	2653.45	2867.47	gene	protein_coding	2	55053435	55055663	+	101255938	PP264_ARATH	Protein LOW PHOTOSYNTHETIC EFFICIENCY 1, chloroplastic {ECO:0000303|PubMed:29891689}	Q:454-2115	H:115-664	68.231	E:0	Eukaryota; Viridiplantae; Streptophyta; Embryophyta; Tracheophyta; Spermatophyta; Magnoliopsida; eudicotyledons; Gunneridae; Pentapetalae; rosids; malvids; Brassicales; Brassicaceae; Camelineae; Arabidopsis	PP264_ARATH	Protein LOW PHOTOSYNTHETIC EFFICIENCY 1, chloroplastic {ECO:0000303|PubMed:29891689}	Q:136-705	H:95-664	67.073	E:0	Eukaryota; Viridiplantae; Streptophyta; Embryophyta; Tracheophyta; Spermatophyta; Magnoliopsida; eudicotyledons; Gunneridae; Pentapetalae; rosids; malvids; Brassicales; Brassicaceae; Camelineae; Arabidopsis	PF01535.21^PPR^PPR repeat^185-206^E:0.15`PF17177.5^PPR_long^Pentacotripeptide-repeat region of PRORP^220-314^E:4e-07`PF13812.7^PPR_3^Pentatricopeptide repeat domain^221-270^E:4.7e-11`PF13041.7^PPR_2^PPR repeat family^224-268^E:6.2e-10`PF01535.21^PPR^PPR repeat^227-256^E:0.12`PF13812.7^PPR_3^Pentatricopeptide repeat domain^246-302^E:1.7e-11`PF12854.8^PPR_1^PPR repeat^255-286^E:5.8e-07`PF13041.7^PP…	.	GO:0009570^cellular_component^chloroplast stroma`GO:0009535^cellular_component^chloroplast thylakoid membrane`GO:0043022^molecular_function^ribosome binding`GO:0003723^molecular_function^RNA binding`GO:0008494^molecular_function^translation activator activity`GO:0010207^biological_process^photosystem II assembly`GO:0032544^biological_process^plastid translation`GO:0009416^biological_process^respo…	GO:0009570^cellular_component^chloroplast stroma`GO:0009535^cellular_component^chloroplast thylakoid membrane`GO:0043022^molecular_function^ribosome binding`GO:0003723^molecular_function^RNA binding`GO:0008494^molecular_function^translation activator activity`GO:0010207^biological_process^photosystem II assembly`GO:0032544^biological_process^plastid translation`GO:0009416^biological_process^respo…	.	KEGG:ath:AT3G46610
Solyc10g011910.3	954.56	0.11	3.21	-4.15873	3.20026713172091e-05	0.000492232686612225	0.77	1220	1853	2339	82	344	86	1233.02	1830.17	2106.24	77.7	393.44	86.77	gene	protein_coding	10	4174666	4176501	-	101258194	WRK22_ARATH	WRKY transcription factor 22	Q:2-160	H:149-201	90.566	E:2.72e-28	Eukaryota; Viridiplantae; Streptophyta; Embryophyta; Tracheophyta; Spermatophyta; Magnoliopsida; eudicotyledons; Gunneridae; Pentapetalae; rosids; malvids; Brassicales; Brassicaceae; Camelineae; Arabidopsis	WRK22_ARATH	WRKY transcription factor 22	Q:1-149	H:149-297	52.5	E:6.05e-41	Eukaryota; Viridiplantae; Streptophyta; Embryophyta; Tracheophyta; Spermatophyta; Magnoliopsida; eudicotyledons; Gunneridae; Pentapetalae; rosids; malvids; Brassicales; Brassicaceae; Camelineae; Arabidopsis	PF03106.16^WRKY^WRKY DNA -binding domain^2-38^E:2.5e-12	.	GO:0005634^cellular_component^nucleus`GO:0003700^molecular_function^DNA-binding transcription factor activity`GO:0043565^molecular_function^sequence-specific DNA binding`GO:0000976^molecular_function^transcription regulatory region sequence-specific DNA binding`GO:0071456^biological_process^cellular response to hypoxia`GO:0006952^biological_process^defense response`GO:0010150^biological_process^l…	GO:0005634^cellular_component^nucleus`GO:0003700^molecular_function^DNA-binding transcription factor activity`GO:0043565^molecular_function^sequence-specific DNA binding`GO:0000976^molecular_function^transcription regulatory region sequence-specific DNA binding`GO:0071456^biological_process^cellular response to hypoxia`GO:0006952^biological_process^defense response`GO:0010150^biological_process^l…	GO:0003700^molecular_function^DNA-binding transcription factor activity`GO:0043565^molecular_function^sequence-specific DNA binding`GO:0006355^biological_process^regulation of transcription, DNA-templated	KEGG:ath:AT4G01250`KO:K13425
Solyc06g053910.3	1797.18	1.41	-0.5	4.15701	3.22434914342876e-05	0.000495571541396503	0.12	1566	1584	1469	2155	1985	1983	1582.71	1564.48	1322.81	2042.02	2270.3	2000.77	gene	protein_coding	6	36895482	36897481	-		NRX2A_HUMAN	Neurexin-2	Q:264-314	H:711-729	63.158	E:4	Eukaryota; Metazoa; Chordata; Craniata; Vertebrata; Euteleostomi; Mammalia; Eutheria; Euarchontoglires; Primates; Haplorrhini; Catarrhini; Hominidae; Homo	NCAP_I84A4	Nucleoprotein {ECO:0000255|HAMAP-Rule:MF_04070}	Q:21-126	H:144-251	25	E:1.3	Viruses; Riboviria; Negarnaviricota; Polyploviricotina; Insthoviricetes; Articulavirales; Orthomyxoviridae; Alphainfluenzavirus	.	.	GO:0016021^cellular_component^integral component of membrane`GO:0005886^cellular_component^plasma membrane`GO:0098793^cellular_component^presynapse`GO:0005246^molecular_function^calcium channel regulator activity`GO:0050839^molecular_function^cell adhesion molecule binding`GO:0046872^molecular_function^metal ion binding`GO:0097109^molecular_function^neuroligin family protein binding`GO:0004888^mo…	GO:0019029^cellular_component^helical viral capsid`GO:0042025^cellular_component^host cell nucleus`GO:0019013^cellular_component^viral nucleocapsid`GO:0003723^molecular_function^RNA binding`GO:0005198^molecular_function^structural molecule activity`GO:0046718^biological_process^viral entry into host cell`GO:0075732^biological_process^viral penetration into host nucleus	.	KEGG:hsa:9379`KO:K07377
Solyc10g079710.2	599.09	1.46	-0.55	4.15443	3.26106505359833e-05	0.000500845841050069	0.13	529	504	477	721	655	694	534.65	497.79	429.53	683.2	749.14	700.22	gene	protein_coding	10	61332080	61344457	+		.	.	.	.	.	.	.	.	.	.	.	.	.	.	.	.	.	.	.	.
Solyc06g051800.3	88.76	2.18	-1.13	4.15323	3.27807953011781e-05	0.000503088793769257	0.27	58	44	72	103	125	124	58.62	43.46	64.84	97.6	142.97	125.11	gene	protein_coding	6	35568630	35570316	-	544035	EXPA4_ARATH	Expansin-A4	Q:2-307	H:156-257	78.431	E:1.72e-53	Eukaryota; Viridiplantae; Streptophyta; Embryophyta; Tracheophyta; Spermatophyta; Magnoliopsida; eudicotyledons; Gunneridae; Pentapetalae; rosids; malvids; Brassicales; Brassicaceae; Camelineae; Arabidopsis	EXPA4_ARATH	Expansin-A4	Q:1-102	H:156-257	78.431	E:1.6e-55	Eukaryota; Viridiplantae; Streptophyta; Embryophyta; Tracheophyta; Spermatophyta; Magnoliopsida; eudicotyledons; Gunneridae; Pentapetalae; rosids; malvids; Brassicales; Brassicaceae; Camelineae; Arabidopsis	PF01357.22^Expansin_C^Expansin C-terminal domain^9-86^E:5.2e-26	.	GO:0005829^cellular_component^cytosol`GO:0005576^cellular_component^extracellular region`GO:0016020^cellular_component^membrane`GO:0009505^cellular_component^plant-type cell wall`GO:0009506^cellular_component^plasmodesma`GO:0009664^biological_process^plant-type cell wall organization`GO:0006949^biological_process^syncytium formation	GO:0005829^cellular_component^cytosol`GO:0005576^cellular_component^extracellular region`GO:0016020^cellular_component^membrane`GO:0009505^cellular_component^plant-type cell wall`GO:0009506^cellular_component^plasmodesma`GO:0009664^biological_process^plant-type cell wall organization`GO:0006949^biological_process^syncytium formation	.	KEGG:ath:AT2G39700
Solyc06g076060.1	10.86	0.09	3.53	-4.15146	3.3035645938201e-05	0.000506627481280038	0.85	18	23	21	2	3	0	18.19	22.72	18.91	1.9	3.43	0	gene	protein_coding	6	47370820	47371104	-		SMR3_ARATH	Cyclin-dependent protein kinase inhibitor SMR3 {ECO:0000303|PubMed:24399300, ECO:0000303|PubMed:26546445}	Q:46-171	H:37-82	45.652	E:0.003	Eukaryota; Viridiplantae; Streptophyta; Embryophyta; Tracheophyta; Spermatophyta; Magnoliopsida; eudicotyledons; Gunneridae; Pentapetalae; rosids; malvids; Brassicales; Brassicaceae; Camelineae; Arabidopsis	.	.	.	.	.	.	.	.	.	GO:0005634^cellular_component^nucleus`GO:0004860^molecular_function^protein kinase inhibitor activity`GO:0007049^biological_process^cell cycle`GO:0045786^biological_process^negative regulation of cell cycle`GO:0045839^biological_process^negative regulation of mitotic nuclear division`GO:0032875^biological_process^regulation of DNA endoreduplication	.	.	KEGG:ath:AT5G02420
Solyc07g047850.3	275444	1.25	-0.32	4.15019	3.32192908645505e-05	0.000509069778946327	0.08	243496	248345	270130	336512	272163	285328	246095	245285	243248	318870	311280	287885	gene	protein_coding	7	59191810	59209628	-		CB24_SOLLC	Chlorophyll a-b binding protein 4, chloroplastic	Q:2-649	H:50-265	100	E:5.07e-159	Eukaryota; Viridiplantae; Streptophyta; Embryophyta; Tracheophyta; Spermatophyta; Magnoliopsida; eudicotyledons; Gunneridae; Pentapetalae; asterids; lamiids; Solanales; Solanaceae; Solanoideae; Solaneae; Solanum; Solanum subgen. Lycopersicon	CB24_SOLLC	Chlorophyll a-b binding protein 4, chloroplastic	Q:1-216	H:50-265	100	E:8.35e-160	Eukaryota; Viridiplantae; Streptophyta; Embryophyta; Tracheophyta; Spermatophyta; Magnoliopsida; eudicotyledons; Gunneridae; Pentapetalae; asterids; lamiids; Solanales; Solanaceae; Solanoideae; Solaneae; Solanum; Solanum subgen. Lycopersicon	PF00504.22^Chloroa_b-bind^Chlorophyll A-B binding protein^17-182^E:8.7e-52	.	GO:0009941^cellular_component^chloroplast envelope`GO:0009535^cellular_component^chloroplast thylakoid membrane`GO:0016021^cellular_component^integral component of membrane`GO:0009522^cellular_component^photosystem I`GO:0009523^cellular_component^photosystem II`GO:0010287^cellular_component^plastoglobule`GO:0016168^molecular_function^chlorophyll binding`GO:0046872^molecular_function^metal ion bin…	GO:0009941^cellular_component^chloroplast envelope`GO:0009535^cellular_component^chloroplast thylakoid membrane`GO:0016021^cellular_component^integral component of membrane`GO:0009522^cellular_component^photosystem I`GO:0009523^cellular_component^photosystem II`GO:0010287^cellular_component^plastoglobule`GO:0016168^molecular_function^chlorophyll binding`GO:0046872^molecular_function^metal ion bin…	.	KEGG:sly:543975`KO:K08913
Solyc05g006820.3	1063.78	1.42	-0.51	4.14994	3.32564536683672e-05	0.000509265371215084	0.12	926	916	880	1292	1190	1154	935.88	904.71	792.43	1224.27	1361.04	1164.34	gene	protein_coding	5	1449607	1452944	+	101251582	DNJB1_MOUSE	DnaJ homolog subfamily B member 1	Q:17-430	H:201-338	42.029	E:3.48e-34	Eukaryota; Metazoa; Chordata; Craniata; Vertebrata; Euteleostomi; Mammalia; Eutheria; Euarchontoglires; Glires; Rodentia; Myomorpha; Muroidea; Muridae; Murinae; Mus; Mus	DNJB1_MOUSE	DnaJ homolog subfamily B member 1	Q:6-143	H:201-338	42.029	E:9e-36	Eukaryota; Metazoa; Chordata; Craniata; Vertebrata; Euteleostomi; Mammalia; Eutheria; Euarchontoglires; Glires; Rodentia; Myomorpha; Muroidea; Muridae; Murinae; Mus; Mus	PF01556.19^DnaJ_C^DnaJ C terminal domain^6-128^E:1.7e-38	.	GO:0005737^cellular_component^cytoplasm`GO:0005829^cellular_component^cytosol`GO:0043197^cellular_component^dendritic spine`GO:0098978^cellular_component^glutamatergic synapse`GO:0043025^cellular_component^neuronal cell body`GO:0005730^cellular_component^nucleolus`GO:0005654^cellular_component^nucleoplasm`GO:0098794^cellular_component^postsynapse`GO:0099524^cellular_component^postsynaptic cytosol…	GO:0005737^cellular_component^cytoplasm`GO:0005829^cellular_component^cytosol`GO:0043197^cellular_component^dendritic spine`GO:0098978^cellular_component^glutamatergic synapse`GO:0043025^cellular_component^neuronal cell body`GO:0005730^cellular_component^nucleolus`GO:0005654^cellular_component^nucleoplasm`GO:0098794^cellular_component^postsynapse`GO:0099524^cellular_component^postsynaptic cytosol…	.	KEGG:mmu:81489`KO:K09507
Solyc01g112050.3	2302.09	0.64	0.64	-4.14795	3.35464390451972e-05	0.000513329381049382	0.15	2395	2796	3581	2070	1645	1549	2420.56	2761.55	3224.64	1961.48	1881.43	1562.88	gene	protein_coding	1	98076814	98086302	-	101257515	REL2_ORYSJ	Protein ROLLING AND ERECT LEAF 2 {ECO:0000303|PubMed:27473144}	Q:2296-2466	H:1-57	40.351	E:0.001	Eukaryota; Viridiplantae; Streptophyta; Embryophyta; Tracheophyta; Spermatophyta; Magnoliopsida; Liliopsida; Poales; Poaceae; BOP clade; Oryzoideae; Oryzeae; Oryzinae; Oryza; Oryza sativa	REL2_ORYSJ	Protein ROLLING AND ERECT LEAF 2 {ECO:0000303|PubMed:27473144}	Q:1-71	H:1-71	36.62	E:0.000188	Eukaryota; Viridiplantae; Streptophyta; Embryophyta; Tracheophyta; Spermatophyta; Magnoliopsida; Liliopsida; Poales; Poaceae; BOP clade; Oryzoideae; Oryzeae; Oryzinae; Oryza; Oryza sativa	PF04783.13^DUF630^Protein of unknown function (DUF630)^1-58^E:1.1e-26`PF04782.13^DUF632^Protein of unknown function (DUF632)^468-501^E:3.3e-06	.	GO:0005886^cellular_component^plasma membrane`GO:0030154^biological_process^cell differentiation`GO:0007275^biological_process^multicellular organism development	GO:0005886^cellular_component^plasma membrane`GO:0030154^biological_process^cell differentiation`GO:0007275^biological_process^multicellular organism development	.	KEGG:osa:4349394
Solyc02g089920.2	5335.72	0.23	2.14	-4.14569	3.38785593040571e-05	0.000518031714135003	0.52	7156	8388	11746	1712	2858	1020	7232.38	8284.64	10577.1	1622.25	3268.77	1029.14	gene	protein_coding	2	52221759	52227210	+		LYK4_ARATH	LysM domain receptor-like kinase 4	Q:11-1816	H:16-606	37.52	E:1.14e-100	Eukaryota; Viridiplantae; Streptophyta; Embryophyta; Tracheophyta; Spermatophyta; Magnoliopsida; eudicotyledons; Gunneridae; Pentapetalae; rosids; malvids; Brassicales; Brassicaceae; Camelineae; Arabidopsis	LYK4_ARATH	LysM domain receptor-like kinase 4	Q:4-605	H:16-606	37.781	E:1.62e-113	Eukaryota; Viridiplantae; Streptophyta; Embryophyta; Tracheophyta; Spermatophyta; Magnoliopsida; eudicotyledons; Gunneridae; Pentapetalae; rosids; malvids; Brassicales; Brassicaceae; Camelineae; Arabidopsis	PF01476.21^LysM^LysM domain^180-221^E:0.0011`PF00069.26^Pkinase^Protein kinase domain^345-593^E:1.8e-33`PF07714.18^PK_Tyr_Ser-Thr^Protein tyrosine and serine/threonine kinase^349-596^E:5e-34	.	GO:0016021^cellular_component^integral component of membrane`GO:0005886^cellular_component^plasma membrane`GO:0005524^molecular_function^ATP binding`GO:0008061^molecular_function^chitin binding`GO:0004672^molecular_function^protein kinase activity`GO:0071323^biological_process^cellular response to chitin`GO:0071219^biological_process^cellular response to molecule of bacterial origin`GO:0045087^bi…	GO:0016021^cellular_component^integral component of membrane`GO:0005886^cellular_component^plasma membrane`GO:0005524^molecular_function^ATP binding`GO:0008061^molecular_function^chitin binding`GO:0004672^molecular_function^protein kinase activity`GO:0071323^biological_process^cellular response to chitin`GO:0071219^biological_process^cellular response to molecule of bacterial origin`GO:0045087^bi…	GO:0004672^molecular_function^protein kinase activity`GO:0005524^molecular_function^ATP binding`GO:0006468^biological_process^protein phosphorylation	KEGG:ath:AT2G23770
Solyc12g009220.2	6425.57	0.13	2.98	-4.14213	3.44102539288433e-05	0.000525776588581858	0.72	8717	11218	15895	997	2466	580	8810.04	11079.8	14313.2	944.73	2820.43	585.2	gene	protein_coding	12	2502493	2504654	+	100134911	TI10A_ORYSJ	Protein TIFY 10a {ECO:0000305}	Q:117-581	H:52-216	42.771	E:1.44e-27	Eukaryota; Viridiplantae; Streptophyta; Embryophyta; Tracheophyta; Spermatophyta; Magnoliopsida; Liliopsida; Poales; Poaceae; BOP clade; Oryzoideae; Oryzeae; Oryzinae; Oryza; Oryza sativa	TI10A_ORYSJ	Protein TIFY 10a {ECO:0000305}	Q:39-193	H:52-216	42.771	E:1.94e-30	Eukaryota; Viridiplantae; Streptophyta; Embryophyta; Tracheophyta; Spermatophyta; Magnoliopsida; Liliopsida; Poales; Poaceae; BOP clade; Oryzoideae; Oryzeae; Oryzinae; Oryza; Oryza sativa	PF06200.15^tify^tify domain^64-97^E:3.8e-19`PF09425.11^Jas_motif^Jas motif^145-170^E:2.6e-12	.	GO:0005634^cellular_component^nucleus`GO:0031347^biological_process^regulation of defense response`GO:2000022^biological_process^regulation of jasmonic acid mediated signaling pathway`GO:0009611^biological_process^response to wounding	GO:0005634^cellular_component^nucleus`GO:0031347^biological_process^regulation of defense response`GO:2000022^biological_process^regulation of jasmonic acid mediated signaling pathway`GO:0009611^biological_process^response to wounding	.	KEGG:osa:4333065`KO:K13464
Solyc05g008120.3	68.29	0.47	1.09	-4.14194	3.44376712980119e-05	0.000525810589123704	0.26	83	89	119	46	33	49	83.89	87.9	107.16	43.59	37.74	49.44	gene	protein_coding	5	2531609	2535997	-		DNAJ_METFK	Chaperone protein DnaJ {ECO:0000255|HAMAP-Rule:MF_01152}	Q:2408-2482	H:6-30	72	E:0.019	Bacteria; Proteobacteria; Betaproteobacteria; Nitrosomonadales; Methylophilaceae; Methylobacillus	MED17_NEOFI	Mediator of RNA polymerase II transcription subunit 17	Q:241-306	H:308-373	30.303	E:0.33	Eukaryota; Fungi; Dikarya; Ascomycota; Pezizomycotina; Eurotiomycetes; Eurotiomycetidae; Eurotiales; Aspergillaceae; Aspergillus; Aspergillus subgen. Fumigati	.	COG0484^ATP binding to DnaK triggers the release of the substrate protein, thus completing the reaction cycle. Several rounds of ATP-dependent interactions between DnaJ, DnaK and GrpE are required for fully efficient folding. Also involved, together with DnaK and GrpE, in the DNA replication of plasmids through activation of initiation proteins (By similarity)	GO:0005737^cellular_component^cytoplasm`GO:0005524^molecular_function^ATP binding`GO:0031072^molecular_function^heat shock protein binding`GO:0051082^molecular_function^unfolded protein binding`GO:0008270^molecular_function^zinc ion binding`GO:0006260^biological_process^DNA replication`GO:0006457^biological_process^protein folding`GO:0009408^biological_process^response to heat	GO:0016592^cellular_component^mediator complex`GO:0003712^molecular_function^transcription coregulator activity`GO:0006357^biological_process^regulation of transcription by RNA polymerase II	.	KEGG:nfi:NFIA_044550`KO:K15134
Solyc11g013770.2	527.08	1.52	-0.6	4.14098	3.45824364001666e-05	0.000527634950690262	0.15	471	411	415	656	605	588	476.03	405.94	373.7	621.61	691.96	593.27	gene	protein_coding	11	7152364	7155696	+		.	.	.	.	.	.	.	.	.	.	.	.	.	.	.	.	.	.	.	.
Solyc01g110670.3	153.24	1.78	-0.84	4.14078	3.46129688255614e-05	0.000527715036761955	0.2	111	100	132	203	200	167	112.18	98.77	118.86	192.36	228.75	168.5	gene	protein_coding	1	97209424	97210656	-		APDE_EMENI	Cytochrome P450 monooxygenase apdE {ECO:0000303|PubMed:17369821}	Q:277-366	H:46-75	40	E:1	Eukaryota; Fungi; Dikarya; Ascomycota; Pezizomycotina; Eurotiomycetes; Eurotiomycetidae; Eurotiales; Aspergillaceae; Aspergillus; Aspergillus subgen. Nidulantes	.	.	.	.	.	.	.	.	.	GO:0016021^cellular_component^integral component of membrane`GO:0020037^molecular_function^heme binding`GO:0005506^molecular_function^iron ion binding`GO:0016712^molecular_function^oxidoreductase activity, acting on paired donors, with incorporation or reduction of molecular oxygen, reduced flavin or flavoprotein as one donor, and incorporation of one atom of oxygen	.	.	KEGG:ani:AN8411.2`KO:K15388
Solyc12g017480.2	83.81	0.24	2.04	-4.137	3.51877360757245e-05	0.000536086443337608	0.49	78	113	237	19	47	27	78.83	111.61	213.42	18	53.76	27.24	gene	protein_coding	12	6762650	6764072	+		PIRL6_ARATH	Plant intracellular Ras-group-related LRR protein 6	Q:2-661	H:154-380	65.639	E:2.09e-88	Eukaryota; Viridiplantae; Streptophyta; Embryophyta; Tracheophyta; Spermatophyta; Magnoliopsida; eudicotyledons; Gunneridae; Pentapetalae; rosids; malvids; Brassicales; Brassicaceae; Camelineae; Arabidopsis`PIRL6_ARATH	PIRL6_ARATH	Plant intracellular Ras-group-related LRR protein 6	Q:1-220	H:154-380	65.639	E:6.95e-98	Eukaryota; Viridiplantae; Streptophyta; Embryophyta; Tracheophyta; Spermatophyta; Magnoliopsida; eudicotyledons; Gunneridae; Pentapetalae; rosids; malvids; Brassicales; Brassicaceae; Camelineae; Arabidopsis`PIRL6_ARATH	PF00560.34^LRR_1^Leucine Rich Repeat^2-17^E:210`PF00560.34^LRR_1^Leucine Rich Repeat^25-40^E:48`PF13516.7^LRR_6^Leucine Rich repeat^25-36^E:1300`PF13516.7^LRR_6^Leucine Rich repeat^45-59^E:940`PF00560.34^LRR_1^Leucine Rich Repeat^48-69^E:25`PF00560.34^LRR_1^Leucine Rich Repeat^71-81^E:24`PF13516.7^LRR_6^Leucine Rich repeat^71-80^E:580`PF13855.7^LRR_8^Leucine rich repeat^94-130^E:8.1e-07`PF00560.3…	.	.	.	GO:0005515^molecular_function^protein binding	KEGG:ath:AT2G19330
Solyc03g117870.3	7236.14	0.74	0.44	-4.13259	3.58701722307704e-05	0.000546084781036207	0.11	8325	8328	9293	6557	5883	5419	8413.85	8225.38	8368.22	6213.25	6728.55	5467.57	gene	protein_coding	3	68362526	68368800	-		4CL1_SOLTU	4-coumarate--CoA ligase 1	Q:110-1111	H:1-334	97.006	E:0	Eukaryota; Viridiplantae; Streptophyta; Embryophyta; Tracheophyta; Spermatophyta; Magnoliopsida; eudicotyledons; Gunneridae; Pentapetalae; asterids; lamiids; Solanales; Solanaceae; Solanoideae; Solaneae; Solanum	4CL1_SOLTU	4-coumarate--CoA ligase 1	Q:1-334	H:1-334	97.006	E:0	Eukaryota; Viridiplantae; Streptophyta; Embryophyta; Tracheophyta; Spermatophyta; Magnoliopsida; eudicotyledons; Gunneridae; Pentapetalae; asterids; lamiids; Solanales; Solanaceae; Solanoideae; Solaneae; Solanum	PF00501.29^AMP-binding^AMP-binding enzyme^37-329^E:1.4e-66	.	GO:0016207^molecular_function^4-coumarate-CoA ligase activity`GO:0005524^molecular_function^ATP binding`GO:0009698^biological_process^phenylpropanoid metabolic process	GO:0016207^molecular_function^4-coumarate-CoA ligase activity`GO:0005524^molecular_function^ATP binding`GO:0009698^biological_process^phenylpropanoid metabolic process	GO:0003824^molecular_function^catalytic activity	KEGG:sot:102596056`KO:K01904
Solyc04g040160.3	6080.36	1.21	-0.28	4.13072	3.61635964327789e-05	0.000550150571971546	0.07	5417	5629	6061	6925	5792	6743	5474.82	5559.64	5457.85	6561.96	6624.47	6803.43	gene	protein_coding	4	11974342	11979493	+		PTC52_ARATH	Protochlorophyllide-dependent translocon component 52, chloroplastic	Q:574-870	H:73-171	83.838	E:6.25e-57	Eukaryota; Viridiplantae; Streptophyta; Embryophyta; Tracheophyta; Spermatophyta; Magnoliopsida; eudicotyledons; Gunneridae; Pentapetalae; rosids; malvids; Brassicales; Brassicaceae; Camelineae; Arabidopsis	PTC52_ARATH	Protochlorophyllide-dependent translocon component 52, chloroplastic	Q:76-174	H:73-171	83.838	E:7.08e-60	Eukaryota; Viridiplantae; Streptophyta; Embryophyta; Tracheophyta; Spermatophyta; Magnoliopsida; eudicotyledons; Gunneridae; Pentapetalae; rosids; malvids; Brassicales; Brassicaceae; Camelineae; Arabidopsis	PF00355.27^Rieske^Rieske [2Fe-2S] domain^87-169^E:1.4e-19	.	GO:0009941^cellular_component^chloroplast envelope`GO:0009706^cellular_component^chloroplast inner membrane`GO:0005829^cellular_component^cytosol`GO:0016021^cellular_component^integral component of membrane`GO:0009536^cellular_component^plastid`GO:0051537^molecular_function^2 iron, 2 sulfur cluster binding`GO:0010277^molecular_function^chlorophyllide a oxygenase [overall] activity`GO:0046872^mole…	GO:0009941^cellular_component^chloroplast envelope`GO:0009706^cellular_component^chloroplast inner membrane`GO:0005829^cellular_component^cytosol`GO:0016021^cellular_component^integral component of membrane`GO:0009536^cellular_component^plastid`GO:0051537^molecular_function^2 iron, 2 sulfur cluster binding`GO:0010277^molecular_function^chlorophyllide a oxygenase [overall] activity`GO:0046872^mole…	GO:0016491^molecular_function^oxidoreductase activity`GO:0051537^molecular_function^2 iron, 2 sulfur cluster binding`GO:0055114^biological_process^oxidation-reduction process	KEGG:ath:AT4G25650
Solyc08g016150.1	2046.53	0.22	2.21	-4.12874	3.64757909421578e-05	0.000554495781897099	0.54	2738	3279	4546	484	1122	434	2767.22	3238.6	4093.61	458.63	1283.26	437.89	gene	protein_coding	8	6950287	6950565	+		.	.	.	.	.	.	.	.	.	.	.	.	.	.	.	.	.	.	.	.
Solyc06g075190.1	2334.16	0.46	1.12	-4.12805	3.65859277512856e-05	0.000555765272216036	0.27	2755	3172	4083	1091	1903	1190	2784.4	3132.92	3676.69	1033.8	2176.51	1200.66	gene	protein_coding	6	46808494	46808781	+	101262017	ETV3_PANTR	ETS translocation variant 3	Q:283-29	H:330-413	27.907	E:1.8	Eukaryota; Metazoa; Chordata; Craniata; Vertebrata; Euteleostomi; Mammalia; Eutheria; Euarchontoglires; Primates; Haplorrhini; Catarrhini; Hominidae; Pan	.	.	.	.	.	.	.	.	.	GO:0000790^cellular_component^nuclear chromatin`GO:0005634^cellular_component^nucleus`GO:0090571^cellular_component^RNA polymerase II transcription repressor complex`GO:0017151^molecular_function^DEAD/H-box RNA helicase binding`GO:0000981^molecular_function^DNA-binding transcription factor activity, RNA polymerase II-specific`GO:0001227^molecular_function^DNA-binding transcription repressor activ…	.	.	KEGG:ptr:457412`KO:K09433
Solyc02g064830.3	149.14	0.05	4.32	-4.12723	3.67159431291748e-05	0.000557334665448826	1.05	126	203	582	3	28	8	127.34	200.5	524.08	2.84	32.02	8.07	gene	protein_coding	2	36524739	36526903	-		GH33_ARATH	Indole-3-acetic acid-amido synthetase GH3.3	Q:3-848	H:316-595	77.66	E:1.91e-159	Eukaryota; Viridiplantae; Streptophyta; Embryophyta; Tracheophyta; Spermatophyta; Magnoliopsida; eudicotyledons; Gunneridae; Pentapetalae; rosids; malvids; Brassicales; Brassicaceae; Camelineae; Arabidopsis	GH33_ARATH	Indole-3-acetic acid-amido synthetase GH3.3	Q:1-282	H:316-595	77.66	E:4.98e-161	Eukaryota; Viridiplantae; Streptophyta; Embryophyta; Tracheophyta; Spermatophyta; Magnoliopsida; eudicotyledons; Gunneridae; Pentapetalae; rosids; malvids; Brassicales; Brassicaceae; Camelineae; Arabidopsis	PF03321.14^GH3^GH3 auxin-responsive promoter^1-253^E:3.3e-99	.	GO:0005737^cellular_component^cytoplasm`GO:0016881^molecular_function^acid-amino acid ligase activity`GO:0010279^molecular_function^indole-3-acetic acid amido synthetase activity`GO:0010252^biological_process^auxin homeostasis	GO:0005737^cellular_component^cytoplasm`GO:0016881^molecular_function^acid-amino acid ligase activity`GO:0010279^molecular_function^indole-3-acetic acid amido synthetase activity`GO:0010252^biological_process^auxin homeostasis	.	KEGG:ath:AT2G23170`KO:K14487
Solyc02g087070.3	47.18	0.16	2.61	-4.12662	3.68131330721204e-05	0.000558403861541641	0.63	27	61	173	13	9	17	27.29	60.25	155.78	12.32	10.29	17.15	gene	protein_coding	2	50236632	50250671	+		DOX1_ARATH	Alpha-dioxygenase 1	Q:648-749	H:3-36	50	E:0.071	Eukaryota; Viridiplantae; Streptophyta; Embryophyta; Tracheophyta; Spermatophyta; Magnoliopsida; eudicotyledons; Gunneridae; Pentapetalae; rosids; malvids; Brassicales; Brassicaceae; Camelineae; Arabidopsis	.	.	.	.	.	.	.	.	.	GO:0012511^cellular_component^monolayer-surrounded lipid storage body`GO:0020037^molecular_function^heme binding`GO:0046872^molecular_function^metal ion binding`GO:0016702^molecular_function^oxidoreductase activity, acting on single donors with incorporation of molecular oxygen, incorporation of two atoms of oxygen`GO:0004601^molecular_function^peroxidase activity`GO:1902609^biological_process^(R…	.	.	KEGG:ath:AT3G01420`KO:K10529
Solyc08g065480.3	1139.63	0.61	0.71	-4.12451	3.71529868727788e-05	0.000563149703709978	0.17	1276	1416	1726	896	912	697	1289.62	1398.55	1554.24	849.03	1043.08	703.25	gene	protein_coding	8	53648908	53657909	-	101263738	HEMH1_ORYSJ	Ferrochelatase-1, chloroplastic	Q:2-313	H:379-482	69.231	E:4.33e-38	Eukaryota; Viridiplantae; Streptophyta; Embryophyta; Tracheophyta; Spermatophyta; Magnoliopsida; Liliopsida; Poales; Poaceae; BOP clade; Oryzoideae; Oryzeae; Oryzinae; Oryza; Oryza sativa	HEMH1_ORYSJ	Ferrochelatase-1, chloroplastic	Q:1-104	H:379-482	69.231	E:3.08e-43	Eukaryota; Viridiplantae; Streptophyta; Embryophyta; Tracheophyta; Spermatophyta; Magnoliopsida; Liliopsida; Poales; Poaceae; BOP clade; Oryzoideae; Oryzeae; Oryzinae; Oryza; Oryza sativa	PF00762.20^Ferrochelatase^Ferrochelatase^1-51^E:2e-13	.	GO:0009507^cellular_component^chloroplast`GO:0005739^cellular_component^mitochondrion`GO:0004325^molecular_function^ferrochelatase activity`GO:0006783^biological_process^heme biosynthetic process	GO:0009507^cellular_component^chloroplast`GO:0005739^cellular_component^mitochondrion`GO:0004325^molecular_function^ferrochelatase activity`GO:0006783^biological_process^heme biosynthetic process	GO:0004325^molecular_function^ferrochelatase activity`GO:0006783^biological_process^heme biosynthetic process	KEGG:osa:4346651`KO:K01772
Solyc09g014480.2	474.26	0.49	1.03	-4.12281	3.74270941206302e-05	0.000566892821832942	0.25	859	587	515	285	314	302	868.17	579.77	463.75	270.06	359.13	304.71	gene	protein_coding	9	6096987	6104847	-		PGIP_PYRCO	Polygalacturonase inhibitor	Q:3-899	H:35-330	54.181	E:2.54e-105	Eukaryota; Viridiplantae; Streptophyta; Embryophyta; Tracheophyta; Spermatophyta; Magnoliopsida; eudicotyledons; Gunneridae; Pentapetalae; rosids; fabids; Rosales; Rosaceae; Amygdaloideae; Maleae; Pyrus	PGIP_PYRCO	Polygalacturonase inhibitor	Q:1-299	H:35-330	54.181	E:2.28e-105	Eukaryota; Viridiplantae; Streptophyta; Embryophyta; Tracheophyta; Spermatophyta; Magnoliopsida; eudicotyledons; Gunneridae; Pentapetalae; rosids; fabids; Rosales; Rosaceae; Amygdaloideae; Maleae; Pyrus	PF08263.13^LRRNT_2^Leucine rich repeat N-terminal domain^1-29^E:9.7e-06`PF13855.7^LRR_8^Leucine rich repeat^105-148^E:5.6e-08`PF00560.34^LRR_1^Leucine Rich Repeat^113-135^E:1.3`PF13516.7^LRR_6^Leucine Rich repeat^113-124^E:14`PF13516.7^LRR_6^Leucine Rich repeat^136-150^E:510`PF13855.7^LRR_8^Leucine rich repeat^137-196^E:4.3e-09`PF00560.34^LRR_1^Leucine Rich Repeat^138-159^E:2.5`PF13516.7^LRR_6^Le…	.	GO:0048046^cellular_component^apoplast`GO:0005618^cellular_component^cell wall	GO:0048046^cellular_component^apoplast`GO:0005618^cellular_component^cell wall	GO:0005515^molecular_function^protein binding	.
Solyc03g033840.3	2880.6	0.51	0.97	-4.12144	3.76519329830193e-05	0.000569884804366628	0.23	3984	3581	4293	2387	2056	1230	4026.52	3536.88	3865.79	2261.86	2351.5	1241.02	gene	protein_coding	3	5469796	5473617	-		HSR4_ARATH	Protein HYPER-SENSITIVITY-RELATED 4 {ECO:0000303|PubMed:15181213}	Q:1336-1635	H:61-160	50	E:8.44e-23	Eukaryota; Viridiplantae; Streptophyta; Embryophyta; Tracheophyta; Spermatophyta; Magnoliopsida; eudicotyledons; Gunneridae; Pentapetalae; rosids; malvids; Brassicales; Brassicaceae; Camelineae; Arabidopsis	HSR4_ARATH	Protein HYPER-SENSITIVITY-RELATED 4 {ECO:0000303|PubMed:15181213}	Q:9-115	H:54-160	49.533	E:2.5e-29	Eukaryota; Viridiplantae; Streptophyta; Embryophyta; Tracheophyta; Spermatophyta; Magnoliopsida; eudicotyledons; Gunneridae; Pentapetalae; rosids; malvids; Brassicales; Brassicaceae; Camelineae; Arabidopsis	PF14363.7^AAA_assoc^Domain associated at C-terminal with AAA^38-115^E:2.3e-16	.	GO:0016021^cellular_component^integral component of membrane`GO:0005740^cellular_component^mitochondrial envelope`GO:0005741^cellular_component^mitochondrial outer membrane`GO:0005739^cellular_component^mitochondrion`GO:0005524^molecular_function^ATP binding`GO:0016887^molecular_function^ATPase activity`GO:0042802^molecular_function^identical protein binding`GO:0008219^biological_process^cell dea…	GO:0016021^cellular_component^integral component of membrane`GO:0005740^cellular_component^mitochondrial envelope`GO:0005741^cellular_component^mitochondrial outer membrane`GO:0005739^cellular_component^mitochondrion`GO:0005524^molecular_function^ATP binding`GO:0016887^molecular_function^ATPase activity`GO:0042802^molecular_function^identical protein binding`GO:0008219^biological_process^cell dea…	.	KEGG:ath:AT3G50930
Solyc08g077880.3	18740	1.28	-0.36	4.11788	3.82375904448771e-05	0.00057832970127933	0.09	16103	17013	17934	21450	17623	22529	16274.9	16803.4	16149.3	20325.5	20155.9	22730.9	gene	protein_coding	8	61909328	61911428	-		LIL32_ARATH	Light-harvesting complex-like protein 3 isotype 2, chloroplastic {ECO:0000305}	Q:3-236	H:176-253	79.487	E:6.18e-39	Eukaryota; Viridiplantae; Streptophyta; Embryophyta; Tracheophyta; Spermatophyta; Magnoliopsida; eudicotyledons; Gunneridae; Pentapetalae; rosids; malvids; Brassicales; Brassicaceae; Camelineae; Arabidopsis	.	.	.	.	.	.	.	.	.	GO:0009507^cellular_component^chloroplast`GO:0009535^cellular_component^chloroplast thylakoid membrane`GO:0016021^cellular_component^integral component of membrane`GO:0009523^cellular_component^photosystem II`GO:0009536^cellular_component^plastid`GO:0042651^cellular_component^thylakoid membrane`GO:0016168^molecular_function^chlorophyll binding`GO:0019899^molecular_function^enzyme binding`GO:00428…	.	.	KEGG:ath:AT5G47110
Solyc02g092470.3	1000.55	0.72	0.48	-4.11714	3.83609578640352e-05	0.000579775461649633	0.12	1207	1107	1316	906	658	886	1219.88	1093.36	1185.04	858.5	752.57	893.94	gene	protein_coding	2	54146531	54157624	-	101259597	BT4_ARATH	BTB/POZ and TAZ domain-containing protein 4	Q:1915-1607	H:228-330	76.699	E:1.16e-81	Eukaryota; Viridiplantae; Streptophyta; Embryophyta; Tracheophyta; Spermatophyta; Magnoliopsida; eudicotyledons; Gunneridae; Pentapetalae; rosids; malvids; Brassicales; Brassicaceae; Camelineae; Arabidopsis`BT4_ARATH	BT4_ARATH	BTB/POZ and TAZ domain-containing protein 4	Q:9-111	H:228-330	76.699	E:3.31e-55	Eukaryota; Viridiplantae; Streptophyta; Embryophyta; Tracheophyta; Spermatophyta; Magnoliopsida; eudicotyledons; Gunneridae; Pentapetalae; rosids; malvids; Brassicales; Brassicaceae; Camelineae; Arabidopsis	PF02135.17^zf-TAZ^TAZ zinc finger^25-110^E:1.6e-13	.	GO:0005737^cellular_component^cytoplasm`GO:0042025^cellular_component^host cell nucleus`GO:0005774^cellular_component^vacuolar membrane`GO:0005516^molecular_function^calmodulin binding`GO:0004402^molecular_function^histone acetyltransferase activity`GO:0003712^molecular_function^transcription coregulator activity`GO:0008270^molecular_function^zinc ion binding`GO:0016567^biological_process^protein…	GO:0005737^cellular_component^cytoplasm`GO:0042025^cellular_component^host cell nucleus`GO:0005774^cellular_component^vacuolar membrane`GO:0005516^molecular_function^calmodulin binding`GO:0004402^molecular_function^histone acetyltransferase activity`GO:0003712^molecular_function^transcription coregulator activity`GO:0008270^molecular_function^zinc ion binding`GO:0016567^biological_process^protein…	GO:0003712^molecular_function^transcription coregulator activity`GO:0004402^molecular_function^histone acetyltransferase activity`GO:0008270^molecular_function^zinc ion binding`GO:0006355^biological_process^regulation of transcription, DNA-templated`GO:0005634^cellular_component^nucleus	KEGG:ath:AT5G67480
Solyc08g068780.2	548.96	0.46	1.11	-4.11589	3.85689143617909e-05	0.000582496657423516	0.27	668	696	988	290	441	260	675.13	687.42	889.68	274.8	504.38	262.33	gene	protein_coding	8	57965820	57966840	-		THT11_TOBAC	Tyramine N-feruloyltransferase 4/11	Q:89-736	H:2-220	77.169	E:1.85e-119	Eukaryota; Viridiplantae; Streptophyta; Embryophyta; Tracheophyta; Spermatophyta; Magnoliopsida; eudicotyledons; Gunneridae; Pentapetalae; asterids; lamiids; Solanales; Solanaceae; Nicotianoideae; Nicotianeae; Nicotiana	THT11_TOBAC	Tyramine N-feruloyltransferase 4/11	Q:30-245	H:2-220	77.169	E:1.66e-119	Eukaryota; Viridiplantae; Streptophyta; Embryophyta; Tracheophyta; Spermatophyta; Magnoliopsida; eudicotyledons; Gunneridae; Pentapetalae; asterids; lamiids; Solanales; Solanaceae; Nicotianoideae; Nicotianeae; Nicotiana	PF00583.26^Acetyltransf_1^Acetyltransferase (GNAT) family^146-225^E:6.7e-07	.	GO:0005737^cellular_component^cytoplasm`GO:0008080^molecular_function^N-acetyltransferase activity`GO:0050366^molecular_function^tyramine N-feruloyltransferase activity	GO:0005737^cellular_component^cytoplasm`GO:0008080^molecular_function^N-acetyltransferase activity`GO:0050366^molecular_function^tyramine N-feruloyltransferase activity	.	KEGG:nta:107822189`KO:K22246
Solyc07g006040.3	241.1	1.7	-0.77	4.11539	3.86522319929579e-05	0.000583332889484466	0.19	199	183	171	274	272	337	201.12	180.75	153.98	259.64	311.09	340.02	gene	protein_coding	7	889273	890219	-		KAIB_SYNY3	Circadian clock protein KaiB {ECO:0000255|HAMAP-Rule:MF_01835}	Q:174-257	H:20-47	46.429	E:7.5	Bacteria; Cyanobacteria; Synechococcales; Merismopediaceae; Synechocystis; unclassified Synechocystis	.	.	.	.	.	.	.	.	COG4251^red, far-red light phototransduction	GO:0042802^molecular_function^identical protein binding`GO:0007623^biological_process^circadian rhythm`GO:0042326^biological_process^negative regulation of phosphorylation	.	.	KEGG:syn:slr0757
Solyc11g065830.2	11271.2	1.43	-0.52	4.11225	3.91824906994096e-05	0.000590908197888784	0.13	9506	9531	9767	12305	11358	15026	9607.46	9413.56	8795.05	11659.9	12990.5	15160.7	gene	protein_coding	11	51690785	51694757	-	101250955	DIT1_ARATH	Dicarboxylate transporter 1, chloroplastic	Q:63-1145	H:1-363	75.603	E:8.77e-150	Eukaryota; Viridiplantae; Streptophyta; Embryophyta; Tracheophyta; Spermatophyta; Magnoliopsida; eudicotyledons; Gunneridae; Pentapetalae; rosids; malvids; Brassicales; Brassicaceae; Camelineae; Arabidopsis	DIT1_ARATH	Dicarboxylate transporter 1, chloroplastic	Q:21-381	H:1-363	75.603	E:0	Eukaryota; Viridiplantae; Streptophyta; Embryophyta; Tracheophyta; Spermatophyta; Magnoliopsida; eudicotyledons; Gunneridae; Pentapetalae; rosids; malvids; Brassicales; Brassicaceae; Camelineae; Arabidopsis	PF00939.20^Na_sulph_symp^Sodium:sulfate symporter transmembrane region^112-379^E:3.8e-81`PF03600.17^CitMHS^Citrate transporter^148-342^E:1.7e-09	.	GO:0009507^cellular_component^chloroplast`GO:0009941^cellular_component^chloroplast envelope`GO:0009706^cellular_component^chloroplast inner membrane`GO:0009534^cellular_component^chloroplast thylakoid`GO:0016021^cellular_component^integral component of membrane`GO:0005739^cellular_component^mitochondrion`GO:0009536^cellular_component^plastid`GO:0015139^molecular_function^alpha-ketoglutarate tran…	GO:0009507^cellular_component^chloroplast`GO:0009941^cellular_component^chloroplast envelope`GO:0009706^cellular_component^chloroplast inner membrane`GO:0009534^cellular_component^chloroplast thylakoid`GO:0016021^cellular_component^integral component of membrane`GO:0005739^cellular_component^mitochondrion`GO:0009536^cellular_component^plastid`GO:0015139^molecular_function^alpha-ketoglutarate tran…	GO:0005215^molecular_function^transporter activity`GO:0006814^biological_process^sodium ion transport`GO:0055085^biological_process^transmembrane transport`GO:0016020^cellular_component^membrane`GO:0016021^cellular_component^integral component of membrane	KEGG:ath:AT5G12860
Solyc12g099160.2	920.78	0.75	0.41	-4.11168	3.92791276785555e-05	0.000591937872134881	0.1	1091	1032	1144	870	692	750	1102.64	1019.28	1030.16	824.39	791.46	756.72	gene	protein_coding	12	67391884	67396674	+		SCP26_ORYSJ	Serine carboxypeptidase-like 26 {ECO:0000305}	Q:247-417	H:39-97	66.102	E:4.73e-19	Eukaryota; Viridiplantae; Streptophyta; Embryophyta; Tracheophyta; Spermatophyta; Magnoliopsida; Liliopsida; Poales; Poaceae; BOP clade; Oryzoideae; Oryzeae; Oryzinae; Oryza; Oryza sativa	.	.	.	.	.	.	.	.	.	GO:0005576^cellular_component^extracellular region`GO:0005773^cellular_component^vacuole`GO:0004185^molecular_function^serine-type carboxypeptidase activity`GO:0051603^biological_process^proteolysis involved in cellular protein catabolic process	.	.	KEGG:osa:4337873`KO:K16297
Solyc01g098390.3	1447.83	0.65	0.63	-4.10999	3.95677625108484e-05	0.000595857387537105	0.15	1555	1729	2216	1257	1096	959	1571.6	1707.7	1995.48	1191.1	1253.53	967.59	gene	protein_coding	1	88792147	88794981	+	101253625	GID1C_ARATH	Gibberellin receptor GID1C	Q:4-969	H:15-335	81.056	E:0	Eukaryota; Viridiplantae; Streptophyta; Embryophyta; Tracheophyta; Spermatophyta; Magnoliopsida; eudicotyledons; Gunneridae; Pentapetalae; rosids; malvids; Brassicales; Brassicaceae; Camelineae; Arabidopsis	GID1C_ARATH	Gibberellin receptor GID1C	Q:2-332	H:15-344	79.758	E:0	Eukaryota; Viridiplantae; Streptophyta; Embryophyta; Tracheophyta; Spermatophyta; Magnoliopsida; eudicotyledons; Gunneridae; Pentapetalae; rosids; malvids; Brassicales; Brassicaceae; Camelineae; Arabidopsis	PF00135.29^COesterase^Carboxylesterase family^89-134^E:0.00014`PF10340.10^Say1_Mug180^Steryl acetyl hydrolase^90-198^E:0.00019`PF07859.14^Abhydrolase_3^alpha/beta hydrolase fold^95-308^E:1.3e-58	.	GO:0005737^cellular_component^cytoplasm`GO:0005634^cellular_component^nucleus`GO:0010331^molecular_function^gibberellin binding`GO:0016787^molecular_function^hydrolase activity`GO:0009056^biological_process^catabolic process`GO:0048444^biological_process^floral organ morphogenesis`GO:0048530^biological_process^fruit morphogenesis`GO:0010476^biological_process^gibberellin mediated signaling pathwa…	GO:0005737^cellular_component^cytoplasm`GO:0005634^cellular_component^nucleus`GO:0010331^molecular_function^gibberellin binding`GO:0016787^molecular_function^hydrolase activity`GO:0009056^biological_process^catabolic process`GO:0048444^biological_process^floral organ morphogenesis`GO:0048530^biological_process^fruit morphogenesis`GO:0010476^biological_process^gibberellin mediated signaling pathwa…	GO:0016787^molecular_function^hydrolase activity	KEGG:ath:AT5G27320`KO:K14493
Solyc08g075120.3	1477.36	1.42	-0.51	4.10755	3.99882719640411e-05	0.000601755740759528	0.12	1287	1232	1271	1819	1359	1907	1300.74	1216.82	1144.52	1723.64	1554.33	1924.09	gene	protein_coding	8	59390517	59397696	-	101256509	ROGFE_ARATH	Rop guanine nucleotide exchange factor 14	Q:1-342	H:459-569	52.941	E:9.11e-26	Eukaryota; Viridiplantae; Streptophyta; Embryophyta; Tracheophyta; Spermatophyta; Magnoliopsida; eudicotyledons; Gunneridae; Pentapetalae; rosids; malvids; Brassicales; Brassicaceae; Camelineae; Arabidopsis	ROGFE_ARATH	Rop guanine nucleotide exchange factor 14	Q:1-114	H:459-569	52.941	E:2.51e-26	Eukaryota; Viridiplantae; Streptophyta; Embryophyta; Tracheophyta; Spermatophyta; Magnoliopsida; eudicotyledons; Gunneridae; Pentapetalae; rosids; malvids; Brassicales; Brassicaceae; Camelineae; Arabidopsis	PF03759.14^PRONE^PRONE (Plant-specific Rop nucleotide exchanger)^1-35^E:7.9e-10	.	GO:0005886^cellular_component^plasma membrane`GO:0005089^molecular_function^Rho guanyl-nucleotide exchange factor activity`GO:0080092^biological_process^regulation of pollen tube growth	GO:0005886^cellular_component^plasma membrane`GO:0005089^molecular_function^Rho guanyl-nucleotide exchange factor activity`GO:0080092^biological_process^regulation of pollen tube growth	GO:0005089^molecular_function^Rho guanyl-nucleotide exchange factor activity	KEGG:ath:AT1G31650
Solyc05g050380.3	7915.98	0.51	0.98	-4.10728	4.00348087753197e-05	0.000602021994782761	0.24	8863	9771	14326	5105	6273	3940	8957.6	9650.6	12900.4	4837.37	7174.6	3975.31	gene	protein_coding	5	61337580	61343288	+		CNG10_ARATH	Probable cyclic nucleotide-gated ion channel 10	Q:2-295	H:603-707	47.222	E:1.24e-16	Eukaryota; Viridiplantae; Streptophyta; Embryophyta; Tracheophyta; Spermatophyta; Magnoliopsida; eudicotyledons; Gunneridae; Pentapetalae; rosids; malvids; Brassicales; Brassicaceae; Camelineae; Arabidopsis	CNGC1_ARATH	Cyclic nucleotide-gated ion channel 1	Q:1-98	H:616-716	59.406	E:4.11e-26	Eukaryota; Viridiplantae; Streptophyta; Embryophyta; Tracheophyta; Spermatophyta; Magnoliopsida; eudicotyledons; Gunneridae; Pentapetalae; rosids; malvids; Brassicales; Brassicaceae; Camelineae; Arabidopsis	.	.	GO:0016021^cellular_component^integral component of membrane`GO:0005886^cellular_component^plasma membrane`GO:0005516^molecular_function^calmodulin binding`GO:0030552^molecular_function^cAMP binding`GO:0030553^molecular_function^cGMP binding`GO:0005216^molecular_function^ion channel activity	GO:0016021^cellular_component^integral component of membrane`GO:0005886^cellular_component^plasma membrane`GO:0005516^molecular_function^calmodulin binding`GO:0030552^molecular_function^cAMP binding`GO:0030553^molecular_function^cGMP binding`GO:0005216^molecular_function^ion channel activity	.	KEGG:ath:AT5G53130`KO:K05391
Solyc07g056000.3	8374.69	0.11	3.21	-4.10698	4.00865674802611e-05	0.000602366332935932	0.78	11517	14006	22071	1145	2877	520	11639.9	13833.4	19874.6	1084.97	3290.5	524.66	gene	protein_coding	7	64022163	64033504	+		XTH16_ARATH	Probable xyloglucan endotransglucosylase/hydrolase protein 16	Q:2-409	H:157-290	59.559	E:2.39e-51	Eukaryota; Viridiplantae; Streptophyta; Embryophyta; Tracheophyta; Spermatophyta; Magnoliopsida; eudicotyledons; Gunneridae; Pentapetalae; rosids; malvids; Brassicales; Brassicaceae; Camelineae; Arabidopsis	XTH16_ARATH	Probable xyloglucan endotransglucosylase/hydrolase protein 16	Q:1-136	H:157-290	59.559	E:2.1e-56	Eukaryota; Viridiplantae; Streptophyta; Embryophyta; Tracheophyta; Spermatophyta; Magnoliopsida; eudicotyledons; Gunneridae; Pentapetalae; rosids; malvids; Brassicales; Brassicaceae; Camelineae; Arabidopsis	PF00722.22^Glyco_hydro_16^Glycosyl hydrolases family 16^1-51^E:4e-13`PF06955.13^XET_C^Xyloglucan endo-transglycosylase (XET) C-terminus^88-132^E:6.6e-19	.	GO:0048046^cellular_component^apoplast`GO:0005618^cellular_component^cell wall`GO:0004553^molecular_function^hydrolase activity, hydrolyzing O-glycosyl compounds`GO:0016762^molecular_function^xyloglucan:xyloglucosyl transferase activity`GO:0042546^biological_process^cell wall biogenesis`GO:0071555^biological_process^cell wall organization`GO:0010411^biological_process^xyloglucan metabolic process	GO:0048046^cellular_component^apoplast`GO:0005618^cellular_component^cell wall`GO:0004553^molecular_function^hydrolase activity, hydrolyzing O-glycosyl compounds`GO:0016762^molecular_function^xyloglucan:xyloglucosyl transferase activity`GO:0042546^biological_process^cell wall biogenesis`GO:0071555^biological_process^cell wall organization`GO:0010411^biological_process^xyloglucan metabolic process	GO:0004553^molecular_function^hydrolase activity, hydrolyzing O-glycosyl compounds`GO:0005975^biological_process^carbohydrate metabolic process`GO:0016762^molecular_function^xyloglucan:xyloglucosyl transferase activity`GO:0006073^biological_process^cellular glucan metabolic process`GO:0005618^cellular_component^cell wall`GO:0048046^cellular_component^apoplast	KEGG:ath:AT3G23730`KO:K08235
Solyc01g100490.3	846.18	2.29	-1.2	4.10592	4.02712558889226e-05	0.000604706225117693	0.29	442	450	721	1193	1451	740	446.72	444.46	649.25	1130.46	1659.55	746.63	gene	protein_coding	1	90378790	90379743	+	101248619	NAS_SOLLC	Nicotianamine synthase	Q:1-951	H:1-317	100	E:0	Eukaryota; Viridiplantae; Streptophyta; Embryophyta; Tracheophyta; Spermatophyta; Magnoliopsida; eudicotyledons; Gunneridae; Pentapetalae; asterids; lamiids; Solanales; Solanaceae; Solanoideae; Solaneae; Solanum; Solanum subgen. Lycopersicon	NAS_SOLLC	Nicotianamine synthase	Q:1-317	H:1-317	100	E:0	Eukaryota; Viridiplantae; Streptophyta; Embryophyta; Tracheophyta; Spermatophyta; Magnoliopsida; eudicotyledons; Gunneridae; Pentapetalae; asterids; lamiids; Solanales; Solanaceae; Solanoideae; Solaneae; Solanum; Solanum subgen. Lycopersicon	PF03059.17^NAS^Nicotianamine synthase protein^4-274^E:3.4e-135	.	GO:0030410^molecular_function^nicotianamine synthase activity`GO:0030418^biological_process^nicotianamine biosynthetic process	GO:0030410^molecular_function^nicotianamine synthase activity`GO:0030418^biological_process^nicotianamine biosynthetic process	GO:0030410^molecular_function^nicotianamine synthase activity`GO:0030418^biological_process^nicotianamine biosynthetic process	KEGG:sly:101248619`KO:K05953
Solyc04g078520.3	951.97	1.49	-0.57	4.10526	4.03853778996785e-05	0.00060598390188504	0.14	807	781	787	1227	857	1262	815.61	771.38	708.68	1162.67	980.17	1273.31	gene	protein_coding	4	63322828	63324604	+		SEC31_DICDI	Protein transport protein SEC31	Q:118-261	H:99-147	30.612	E:8.7	Eukaryota; Amoebozoa; Evosea; Eumycetozoa; Dictyostelia; Dictyosteliales; Dictyosteliaceae; Dictyostelium	RS18_ANAPZ	30S ribosomal protein S18 {ECO:0000255|HAMAP-Rule:MF_00270}	Q:30-70	H:21-61	31.707	E:7.6	Bacteria; Proteobacteria; Alphaproteobacteria; Rickettsiales; Anaplasmataceae; Anaplasma; phagocytophilum group	.	COG0238^Binds as a heterodimer with protein S6 to the central domain of the 16S rRNA, where it helps stabilize the platform of the 30S subunit (By similarity)	GO:0030127^cellular_component^COPII vesicle coat`GO:0070971^cellular_component^endoplasmic reticulum exit site`GO:0005789^cellular_component^endoplasmic reticulum membrane`GO:0000139^cellular_component^Golgi membrane`GO:0005198^molecular_function^structural molecule activity`GO:0090114^biological_process^COPII-coated vesicle budding`GO:0090110^biological_process^COPII-coated vesicle cargo loading…	GO:0005840^cellular_component^ribosome`GO:0019843^molecular_function^rRNA binding`GO:0003735^molecular_function^structural constituent of ribosome`GO:0006412^biological_process^translation	.	KEGG:aph:APH_0152`KO:K02963
Solyc02g070877.1	427.06	0.68	0.56	-4.10405	4.05980729979582e-05	0.000608737772710764	0.14	529	504	551	385	322	298	534.65	497.79	496.17	364.82	368.28	300.67	gene	protein_coding	2	41046208	41048328	+		COX3_CANGA	Cytochrome c oxidase subunit 3	Q:125-45	H:205-231	40.741	E:3.5	Eukaryota; Fungi; Dikarya; Ascomycota; Saccharomycotina; Saccharomycetes; Saccharomycetales; Saccharomycetaceae; Nakaseomyces; Nakaseomyces/Candida clade	.	.	.	.	.	.	.	.	.	GO:0016021^cellular_component^integral component of membrane`GO:0005751^cellular_component^mitochondrial respiratory chain complex IV`GO:0004129^molecular_function^cytochrome-c oxidase activity`GO:0006123^biological_process^mitochondrial electron transport, cytochrome c to oxygen	.	.	KEGG:cgr:CaglfMp12`KO:K02262
Solyc05g051490.3	836.54	0.69	0.54	-4.1007	4.11895313169178e-05	0.000617162884168491	0.13	971	1020	1091	766	647	577	981.36	1007.43	982.43	725.84	739.99	582.17	gene	protein_coding	5	62691080	62705238	-	101256880	.	.	.	.	.	.	.	RPOC_RHIE6	DNA-directed RNA polymerase subunit beta' {ECO:0000255|HAMAP-Rule:MF_01322}	Q:45-125	H:1287-1366	33.721	E:0.023	Bacteria; Proteobacteria; Alphaproteobacteria; Rhizobiales; Rhizobiaceae; Rhizobium/Agrobacterium group; Rhizobium	.	COG0086^DNA-dependent RNA polymerase catalyzes the transcription of DNA into RNA using the four ribonucleoside triphosphates as substrates (By similarity)	.	GO:0003677^molecular_function^DNA binding`GO:0003899^molecular_function^DNA-directed 5'-3' RNA polymerase activity`GO:0000287^molecular_function^magnesium ion binding`GO:0008270^molecular_function^zinc ion binding`GO:0006351^biological_process^transcription, DNA-templated	.	KEGG:rec:RHECIAT_CH0001742`KO:K03046
Solyc01g109090.2	3728.16	0.52	0.94	-4.10009	4.12981418538533e-05	0.000618346353496144	0.23	4113	4824	6418	2305	3027	2004	4156.9	4764.56	5779.32	2184.16	3462.06	2021.96	gene	protein_coding	1	96055967	96056431	+		.	.	.	.	.	.	.	.	.	.	.	.	.	.	.	.	.	.	.	.
Solyc02g089630.3	3191.52	0.18	2.49	-4.09885	4.15206104395349e-05	0.000621231671035106	0.61	2510	5693	8997	979	1293	477	2536.79	5622.85	8101.68	927.68	1478.84	481.27	gene	protein_coding	2	52017396	52019762	-	101268445	PROD2_ARATH	Proline dehydrogenase 2, mitochondrial	Q:133-687	H:1-167	39.572	E:4.44e-29	Eukaryota; Viridiplantae; Streptophyta; Embryophyta; Tracheophyta; Spermatophyta; Magnoliopsida; eudicotyledons; Gunneridae; Pentapetalae; rosids; malvids; Brassicales; Brassicaceae; Camelineae; Arabidopsis	PROD2_ARATH	Proline dehydrogenase 2, mitochondrial	Q:1-185	H:1-167	39.572	E:1.03e-29	Eukaryota; Viridiplantae; Streptophyta; Embryophyta; Tracheophyta; Spermatophyta; Magnoliopsida; eudicotyledons; Gunneridae; Pentapetalae; rosids; malvids; Brassicales; Brassicaceae; Camelineae; Arabidopsis	.	.	GO:0005739^cellular_component^mitochondrion`GO:0071949^molecular_function^FAD binding`GO:0004657^molecular_function^proline dehydrogenase activity`GO:0006562^biological_process^proline catabolic process`GO:0010133^biological_process^proline catabolic process to glutamate`GO:0006970^biological_process^response to osmotic stress`GO:0009414^biological_process^response to water deprivation	GO:0005739^cellular_component^mitochondrion`GO:0071949^molecular_function^FAD binding`GO:0004657^molecular_function^proline dehydrogenase activity`GO:0006562^biological_process^proline catabolic process`GO:0010133^biological_process^proline catabolic process to glutamate`GO:0006970^biological_process^response to osmotic stress`GO:0009414^biological_process^response to water deprivation	.	KEGG:ath:AT5G38710`KO:K00318
Solyc03g116680.3	9977.86	0.59	0.75	-4.09642	4.19582204640555e-05	0.000627329496794961	0.18	10367	13063	15752	7758	7823	5951	10477.6	12902	14184.5	7351.29	8947.38	6004.33	gene	protein_coding	3	67467770	67473729	+		MBD11_ARATH	Methyl-CpG-binding domain-containing protein 11	Q:1-210	H:22-91	67.143	E:5.27e-25	Eukaryota; Viridiplantae; Streptophyta; Embryophyta; Tracheophyta; Spermatophyta; Magnoliopsida; eudicotyledons; Gunneridae; Pentapetalae; rosids; malvids; Brassicales; Brassicaceae; Camelineae; Arabidopsis	MBD11_ARATH	Methyl-CpG-binding domain-containing protein 11	Q:1-125	H:22-145	49.6	E:3.96e-29	Eukaryota; Viridiplantae; Streptophyta; Embryophyta; Tracheophyta; Spermatophyta; Magnoliopsida; eudicotyledons; Gunneridae; Pentapetalae; rosids; malvids; Brassicales; Brassicaceae; Camelineae; Arabidopsis	PF01429.20^MBD^Methyl-CpG binding domain^3-53^E:1.2e-08	.	GO:0042025^cellular_component^host cell nucleus`GO:0005634^cellular_component^nucleus`GO:0008327^molecular_function^methyl-CpG binding	GO:0042025^cellular_component^host cell nucleus`GO:0005634^cellular_component^nucleus`GO:0008327^molecular_function^methyl-CpG binding	GO:0003677^molecular_function^DNA binding`GO:0005634^cellular_component^nucleus	KEGG:ath:AT3G15790
[truncated: 23,855 more rows]

## Sheet: sig_all_genes
Gene	BaseMean	Estimated_FoldChange	log2_Estimated_FoldChange2	Wald_stat	p_value_not_adjusted	FDR_adjusted_p_value	Standard_error_estimate	Sample_D1_I2_N_A_raw_counts	Sample_D1_I2_N_B_raw_counts	Sample_D1_I2_N_C_raw_counts	Sample_D1_K_N_A_raw_counts	Sample_D1_K_N_B_raw_counts	Sample_D1_K_N_C_raw_counts	Sample_D1_I2_N_A_normalized_counts	Sample_D1_I2_N_B_normalized_counts	Sample_D1_I2_N_C_normalized_counts	Sample_D1_K_N_A_normalized_counts	Sample_D1_K_N_B_normalized_counts	Sample_D1_K_N_C_normalized_counts	type	gene_biotype	seqid	start	end	strand	ncbi_id	Blastx_gene_name	Blastx_full_name	Blastx_query_range	Blastx_hit_range	Blastx_%_of_identity	Blastx_Evalue	Blastx_related_organisms	Blastp_gene_name	Blastp_full_name	Blastp_query_range	Blastp_hit_range	Blastp_%_of_identity	Blastp_Evalue	Blastp_related_organisms	Pfam_info	Eggnog_info	Gene_ontology_BLASTX	Gene_ontology_BLASTP	Gene_ontology_PFAM	Kegg_info
[truncated: 3,089 more rows]
