# Supplementary material for: Transcriptome Dynamics Underlying Planticine®-Induced Defense Responses of Tomato (Solanum lycopersicum L.) to Biotic Stresses
Source: Int J Mol Sci. 2023 Mar 30;24(7):6494. doi: 10.3390/ijms24076494 (PMC10095179; doi:10.3390/ijms24076494)
Supplement: Supplementary file 1 [file ijms-24-06494-s001.zip › Supplementary data S2_ GO_enrichment.xlsx]

## Sheet: BP
GO.ID	Term	Annotated	Significant	Expected	Rank in Fisher.classic	Fisher.elim	Fisher.classic	GO_upregulated_genes_count	GO_downregulated_genes_count	GO_upregulated_genes	GO_downregulated_genes
GO:0006468	protein phosphorylation	762	246	148.7	1	2.8e-15	7.6e-19	85	161	Solyc01g007130.3 | Solyc01g059870.3 | Solyc01g089850.3 | Solyc01g098410.3 | Solyc01g098740.3 | Solyc01g105670.3 | Solyc02g021590.3 | Solyc02g067030.3 | Solyc02g071260.3 | Solyc02g072540.3 | Solyc02g081470.3 | Solyc02g091840.3 | Solyc02g091860.3 | Solyc03g006030.3 | Solyc03g064010.3 | Solyc03g080060.1 | Solyc03g095510.3 | Solyc03g112050.3 | Solyc03g112580.3 | Solyc03g114080.2 | Solyc04g008370.2 | …	Solyc00g007060.3 | Solyc01g008497.1 | Solyc01g008500.3 | Solyc01g010660.3 | Solyc01g067020.3 | Solyc01g081297.1 | Solyc01g088690.3 | Solyc01g094020.3 | Solyc01g097840.3 | Solyc01g102700.3 | Solyc01g103940.3 | Solyc01g106500.3 | Solyc01g108840.3 | Solyc01g112220.3 | Solyc02g014030.2 | Solyc02g021440.3 | Solyc02g031790.2 | Solyc02g062780.3 | Solyc02g064980.1 | Solyc02g071740.3 | Solyc02g071820.3 | …
GO:0009768	photosynthesis, light harvesting in photosystem I	15	14	2.93	12	1.4e-09	1.4e-09	14	0	Solyc01g105030.3 | Solyc01g105050.3 | Solyc03g005760.1 | Solyc03g005770.2 | Solyc05g056050.3 | Solyc05g056070.3 | Solyc06g069730.3 | Solyc07g063600.3 | Solyc09g014520.3 | Solyc10g006230.3 | Solyc10g007690.3 | Solyc12g006140.2 | Solyc12g011280.2 | Solyc12g011450.2
GO:0018298	protein-chromophore linkage	28	20	5.46	16	3.6e-09	3.6e-09	20	0	Solyc01g059870.3 | Solyc01g105030.3 | Solyc01g105050.3 | Solyc02g071260.3 | Solyc03g005760.1 | Solyc03g005770.2 | Solyc03g115900.3 | Solyc05g056050.3 | Solyc05g056070.3 | Solyc06g063360.3 | Solyc06g069730.3 | Solyc07g063600.3 | Solyc08g074270.3 | Solyc09g014520.3 | Solyc10g006230.3 | Solyc10g007690.3 | Solyc10g044670.2 | Solyc12g006140.2 | Solyc12g011280.2 | Solyc12g011450.2
GO:0006355	regulation of transcription, DNA-templated	804	219	156.9	20	1.3e-08	1.3e-08	93	126	Solyc01g007810.1 | Solyc01g059870.3 | Solyc01g087690.2 | Solyc01g102740.3 | Solyc01g104650.3 | Solyc01g109550.2 | Solyc01g109700.3 | Solyc01g112190.3 | Solyc02g021430.1 | Solyc02g064960.3 | Solyc02g067230.3 | Solyc02g069855.1 | Solyc02g069860.3 | Solyc02g071260.3 | Solyc02g077950.2 | Solyc02g084240.3 | Solyc02g084420.3 | Solyc02g084590.3 | Solyc02g092070.3 | Solyc02g093130.2 | Solyc02g093150.3 | …	Solyc01g057460.3 | Solyc01g073910.3 | Solyc01g079260.3 | Solyc01g090300.3 | Solyc01g095100.3 | Solyc01g095460.3 | Solyc01g095630.3 | Solyc01g096320.3 | Solyc01g096810.3 | Solyc01g097330.3 | Solyc01g105810.3 | Solyc01g108130.3 | Solyc01g108240.3 | Solyc01g110310.3 | Solyc01g110480.3 | Solyc01g111580.3 | Solyc02g032950.3 | Solyc02g063520.3 | Solyc02g072000.3 | Solyc02g077370.1 | Solyc02g080890.3 | …
GO:0009733	response to auxin	100	41	19.51	30	5.5e-07	5.5e-07	28	13	Solyc01g091030.3 | Solyc01g110560.3 | Solyc01g110590.3 | Solyc01g110605.1 | Solyc01g110670.3 | Solyc01g110730.3 | Solyc01g110920.3 | Solyc01g110940.3 | Solyc01g110970.3 | Solyc03g033590.1 | Solyc03g082510.1 | Solyc04g007690.3 | Solyc04g078900.3 | Solyc05g008060.3 | Solyc05g047460.3 | Solyc05g056430.2 | Solyc06g053260.1 | Solyc06g053830.3 | Solyc06g053840.3 | Solyc06g084070.3 | Solyc07g014620.1 | …	Solyc01g110843.1 | Solyc02g072520.3 | Solyc03g082520.1 | Solyc03g082530.1 | Solyc03g121060.3 | Solyc05g015520.3 | Solyc05g056040.3 | Solyc07g042490.1 | Solyc07g056570.1 | Solyc08g077020.1 | Solyc08g078340.3 | Solyc10g084020.1 | Solyc10g084023.1
GO:0015979	photosynthesis	136	59	26.54	9	4.8e-05	1.3e-10	59	0	Solyc01g087040.2 | Solyc01g096870.3 | Solyc01g105030.3 | Solyc01g105050.3 | Solyc02g065400.3 | Solyc02g069460.3 | Solyc02g079950.3 | Solyc02g080540.1 | Solyc03g005760.1 | Solyc03g005770.2 | Solyc03g062720.3 | Solyc03g082970.3 | Solyc03g115900.3 | Solyc03g115980.1 | Solyc04g009420.3 | Solyc04g064670.3 | Solyc05g025600.1 | Solyc05g056050.3 | Solyc05g056070.3 | Solyc06g054260.1 | Solyc06g060340.3 | …
GO:0007165	signal transduction	473	145	92.31	13	7.9e-05	1.6e-09	51	94	Solyc01g006650.2 | Solyc01g059870.3 | Solyc01g096360.3 | Solyc01g102850.2 | Solyc02g067030.3 | Solyc02g071260.3 | Solyc02g072540.3 | Solyc02g083670.3 | Solyc02g091840.3 | Solyc02g092110.3 | Solyc03g095510.3 | Solyc04g007690.3 | Solyc05g006420.3 | Solyc05g008060.3 | Solyc05g009170.2 | Solyc05g047460.3 | Solyc05g049970.3 | Solyc05g052270.2 | Solyc05g053210.3 | Solyc06g007440.3 | Solyc06g053830.3 | …	Solyc01g014840.3 | Solyc01g088560.3 | Solyc01g096810.3 | Solyc01g097840.3 | Solyc01g098390.3 | Solyc01g099520.3 | Solyc01g102840.3 | Solyc01g102880.2 | Solyc01g103940.3 | Solyc01g105810.3 | Solyc01g109110.3 | Solyc01g112350.3 | Solyc02g021440.3 | Solyc02g032850.3 | Solyc02g063010.3 | Solyc02g064980.1 | Solyc02g068680.1 | Solyc02g069310.3 | Solyc02g071220.3 | Solyc02g071990.3 | Solyc02g082550.3 | …
GO:0048544	recognition of pollen	37	17	7.22	51	0.00023	0.00023	4	13	Solyc04g008370.2 | Solyc04g077370.2 | Solyc07g063735.1 | Solyc09g009150.1	Solyc02g079570.3 | Solyc02g079590.3 | Solyc02g079710.3 | Solyc03g078360.2 | Solyc04g077270.3 | Solyc07g053220.2 | Solyc07g055690.2 | Solyc09g011330.2 | Solyc09g075910.1 | Solyc09g075920.1 | Solyc10g006690.3 | Solyc11g005630.1 | Solyc11g013880.1
GO:0009638	phototropism	5	5	0.98	54	0.00028	0.00028	5	0	Solyc05g007480.1 | Solyc06g069880.1 | Solyc07g043130.3 | Solyc10g081340.1 | Solyc11g067080.2
GO:2000022	regulation of jasmonic acid mediated signaling pathway	14	9	2.73	55	0.00031	0.00031	0	9		Solyc02g032850.3 | Solyc02g069310.3 | Solyc03g122190.3 | Solyc07g042170.3 | Solyc08g036620.3 | Solyc08g036640.3 | Solyc11g011030.2 | Solyc12g009220.2 | Solyc12g049400.2
GO:0098542	defense response to other organism	94	31	18.34	68	0.00134	0.00134	11	20	Solyc03g080060.1 | Solyc03g121900.1 | Solyc05g015490.3 | Solyc05g023760.3 | Solyc05g052600.3 | Solyc05g055850.3 | Solyc07g053600.3 | Solyc08g061560.3 | Solyc09g011070.2 | Solyc10g007600.3 | Solyc12g056830.1	Solyc01g005430.3 | Solyc01g067740.3 | Solyc01g108160.3 | Solyc01g109110.3 | Solyc02g032850.3 | Solyc02g069310.3 | Solyc02g077060.2 | Solyc02g082920.3 | Solyc03g095610.3 | Solyc03g119590.1 | Solyc04g007140.1 | Solyc05g009480.1 | Solyc05g053010.1 | Solyc06g005170.3 | Solyc06g035700.1 | Solyc07g008620.1 | Solyc09g005000.1 | Solyc09g018220.2 | Solyc10g008150.1 | Solyc11g006000.2
GO:0010200	response to chitin	6	5	1.17	70	0.00142	0.00142	1	4	Solyc12g008380.1	Solyc02g093050.3 | Solyc04g082890.3 | Solyc08g078190.1 | Solyc09g018230.1
GO:0030968	endoplasmic reticulum unfolded protein response	4	4	0.78	71	0.00145	0.00145	0	4		Solyc03g118040.3 | Solyc04g082890.3 | Solyc05g015530.3 | Solyc08g082820.3
GO:0009625	response to insect	4	4	0.78	72	0.00145	0.00145	0	4		Solyc02g032850.3 | Solyc02g072520.3 | Solyc03g095770.3 | Solyc09g008670.3
GO:0080142	regulation of salicylic acid biosynthetic process	4	4	0.78	73	0.00145	0.00145	0	4		Solyc02g032850.3 | Solyc02g079040.3 | Solyc03g119250.3 | Solyc12g036390.2
GO:0042343	indole glucosinolate metabolic process	4	4	0.78	74	0.00145	0.00145	2	2	Solyc04g079680.3 | Solyc09g059240.3	Solyc02g092860.3 | Solyc07g014670.3
GO:0046777	protein autophosphorylation	79	27	15.42	78	0.00148	0.00148	10	17	Solyc02g091840.3 | Solyc02g091860.3 | Solyc03g112580.3 | Solyc04g064940.3 | Solyc05g009990.3 | Solyc07g053180.3 | Solyc07g053600.3 | Solyc07g065860.3 | Solyc08g061560.3 | Solyc11g044940.1	Solyc02g014030.2 | Solyc02g072520.3 | Solyc02g078530.3 | Solyc03g033540.3 | Solyc03g059490.1 | Solyc03g115610.3 | Solyc05g012430.1 | Solyc05g014340.3 | Solyc06g071810.1 | Solyc07g062620.3 | Solyc08g066210.3 | Solyc09g015830.2 | Solyc09g072810.3 | Solyc10g006870.1 | Solyc10g083920.2 | Solyc11g017270.2 | Solyc11g017280.2
GO:0031347	regulation of defense response	51	19	9.95	81	0.00236	0.00236	1	18	Solyc10g007600.3	Solyc02g032850.3 | Solyc03g095610.3 | Solyc03g095770.3 | Solyc03g119590.1 | Solyc03g122190.3 | Solyc04g007140.1 | Solyc04g054690.3 | Solyc05g009480.1 | Solyc07g042170.3 | Solyc08g036620.3 | Solyc08g036640.3 | Solyc09g008670.3 | Solyc09g059430.3 | Solyc11g005720.1 | Solyc11g006000.2 | Solyc11g011030.2 | Solyc12g009220.2 | Solyc12g049400.2
GO:0009416	response to light stimulus	144	46	28.1	53	0.00273	0.00024	36	10	Solyc01g059870.3 | Solyc01g105030.3 | Solyc01g105050.3 | Solyc02g071260.3 | Solyc02g084420.3 | Solyc02g086350.3 | Solyc02g087400.1 | Solyc03g005760.1 | Solyc03g005770.2 | Solyc03g006880.3 | Solyc03g114450.3 | Solyc05g007480.1 | Solyc05g056050.3 | Solyc05g056070.3 | Solyc06g062480.3 | Solyc06g069730.3 | Solyc06g069880.1 | Solyc06g073180.3 | Solyc07g005510.3 | Solyc07g043130.3 | Solyc07g063600.3 | …	Solyc01g067740.3 | Solyc01g079200.3 | Solyc01g096030.3 | Solyc02g032850.3 | Solyc05g050930.2 | Solyc07g062310.3 | Solyc08g065870.3 | Solyc10g008880.3 | Solyc10g085030.1 | Solyc11g068390.1
GO:0090698	post-embryonic plant morphogenesis	12	7	2.34	84	0.00335	0.00335	4	3	Solyc07g053600.3 | Solyc08g061560.3 | Solyc09g091280.3 | Solyc11g044940.1	Solyc01g098390.3 | Solyc02g090400.3 | Solyc09g074270.3
GO:0009687	abscisic acid metabolic process	7	5	1.37	87	0.00415	0.00415	1	4	Solyc04g078900.3	Solyc04g005480.1 | Solyc07g056570.1 | Solyc08g005610.3 | Solyc08g016720.1
GO:1901658	glycosyl compound catabolic process	7	5	1.37	88	0.00415	0.00415	3	2	Solyc01g074040.2 | Solyc03g006980.3 | Solyc11g042460.2	Solyc01g097880.3 | Solyc09g009690.3
GO:0000160	phosphorelay signal transduction system	46	17	8.98	91	0.00433	0.00433	10	7	Solyc01g006650.2 | Solyc01g059870.3 | Solyc02g071260.3 | Solyc02g083670.3 | Solyc05g006420.3 | Solyc07g056580.3 | Solyc09g089610.3 | Solyc10g044670.2 | Solyc10g079710.2 | Solyc11g006180.2	Solyc01g096810.3 | Solyc02g032850.3 | Solyc02g071220.3 | Solyc03g093610.1 | Solyc03g113720.3 | Solyc05g015610.3 | Solyc06g069697.1
GO:0031146	SCF-dependent proteasomal ubiquitin-dependent protein catabolic process	22	10	4.29	92	0.00505	0.00505	6	4	Solyc07g005750.3 | Solyc07g008250.3 | Solyc07g066240.3 | Solyc08g060810.3 | Solyc09g074520.3 | Solyc12g009560.2	Solyc02g089310.1 | Solyc02g092990.1 | Solyc05g015520.3 | Solyc12g010900.1
GO:0015995	chlorophyll biosynthetic process	16	8	3.12	93	0.00594	0.00594	8	0	Solyc01g067890.3 | Solyc03g115980.1 | Solyc03g118240.3 | Solyc04g015750.3 | Solyc07g054210.3 | Solyc08g074560.3 | Solyc10g008740.3 | Solyc10g077040.2
GO:0071241	cellular response to inorganic substance	13	7	2.54	94	0.00604	0.00604	3	4	Solyc01g006650.2 | Solyc03g114450.3 | Solyc04g014690.3	Solyc01g007110.3 | Solyc01g067740.3 | Solyc01g096810.3 | Solyc07g049530.3
GO:1903409	reactive oxygen species biosynthetic process	5	4	0.98	95	0.0061	0.0061	3	1	Solyc05g055850.3 | Solyc10g007600.3 | Solyc11g013810.2	Solyc01g009030.3
GO:0009414	response to water deprivation	59	20	11.51	96	0.00642	0.00642	6	14	Solyc03g119690.2 | Solyc04g078900.3 | Solyc07g053180.3 | Solyc08g074560.3 | Solyc11g069430.2 | Solyc12g056220.2	Solyc01g086960.3 | Solyc01g095140.3 | Solyc01g095150.3 | Solyc01g099680.3 | Solyc01g104740.3 | Solyc01g109920.2 | Solyc03g097270.3 | Solyc04g073990.3 | Solyc06g005170.3 | Solyc07g056570.1 | Solyc08g005610.3 | Solyc08g016720.1 | Solyc09g075820.3 | Solyc09g075830.3
GO:0023014	signal transduction by protein phosphorylation	44	16	8.59	100	0.00667	0.00667	7	9	Solyc01g059870.3 | Solyc02g071260.3 | Solyc05g049970.3 | Solyc07g056580.3 | Solyc09g089610.3 | Solyc10g044670.2 | Solyc11g006180.2	Solyc02g064980.1 | Solyc02g090430.3 | Solyc02g090970.1 | Solyc03g117640.1 | Solyc03g123800.2 | Solyc04g079400.3 | Solyc06g005170.3 | Solyc11g006000.2 | Solyc12g040680.2
GO:0006433	prolyl-tRNA aminoacylation	3	3	0.59	101	0.00742	0.00742	1	2	Solyc01g096870.3	Solyc03g117330.3 | Solyc06g068320.3
GO:0006123	mitochondrial electron transport, cytochrome c to oxygen	3	3	0.59	102	0.00742	0.00742	0	3		Solyc01g103220.3 | Solyc11g042420.2 | Solyc12g042900.2
GO:0035556	intracellular signal transduction	216	63	42.15	58	0.00891	0.00036	19	44	Solyc01g006650.2 | Solyc01g059870.3 | Solyc02g067030.3 | Solyc02g071260.3 | Solyc02g083670.3 | Solyc03g095510.3 | Solyc05g006420.3 | Solyc05g049970.3 | Solyc07g056580.3 | Solyc08g062670.3 | Solyc08g075890.3 | Solyc09g089610.3 | Solyc10g044670.2 | Solyc10g074930.1 | Solyc10g079710.2 | Solyc11g006180.2 | Solyc12g005840.2 | Solyc12g088820.2 | Solyc12g098510.1	Solyc01g088560.3 | Solyc01g096810.3 | Solyc01g097840.3 | Solyc01g099520.3 | Solyc01g103940.3 | Solyc01g105810.3 | Solyc01g112350.3 | Solyc02g032850.3 | Solyc02g064980.1 | Solyc02g068680.1 | Solyc02g071220.3 | Solyc02g082550.3 | Solyc02g083850.3 | Solyc02g090430.3 | Solyc02g090970.1 | Solyc02g094000.1 | Solyc03g033540.3 | Solyc03g093610.1 | Solyc03g098050.3 | Solyc03g113720.3 | Solyc03g115370.3 | …
GO:0009723	response to ethylene	27	11	5.27	103	0.009	0.009	6	5	Solyc01g006650.2 | Solyc06g036305.1 | Solyc07g056580.3 | Solyc09g089610.3 | Solyc11g006180.2 | Solyc11g011260.1	Solyc01g096810.3 | Solyc02g032850.3 | Solyc03g093610.1 | Solyc07g049530.3 | Solyc08g078340.3
GO:0008300	isoprenoid catabolic process	8	5	1.56	105	0.0093	0.0093	1	4	Solyc04g078900.3	Solyc01g079200.3 | Solyc07g056570.1 | Solyc08g005610.3 | Solyc08g016720.1
GO:0008272	sulfate transport	8	5	1.56	106	0.0093	0.0093	4	1	Solyc04g072740.3 | Solyc04g072760.3 | Solyc05g054740.3 | Solyc09g065560.3	Solyc11g010500.1
GO:0009739	response to gibberellin	17	8	3.32	107	0.00933	0.00933	4	4	Solyc03g119740.3 | Solyc05g009170.2 | Solyc06g036305.1 | Solyc11g011260.1	Solyc01g098390.3 | Solyc07g056570.1 | Solyc08g078340.3 | Solyc09g074270.3
GO:0009765	photosynthesis, light harvesting	26	20	5.07	11	0.0099	4e-10	20	0	Solyc01g105030.3 | Solyc01g105050.3 | Solyc03g005760.1 | Solyc03g005770.2 | Solyc03g115900.3 | Solyc05g056050.3 | Solyc05g056070.3 | Solyc06g063360.3 | Solyc06g069730.3 | Solyc07g022900.3 | Solyc07g047850.3 | Solyc07g063600.3 | Solyc08g067320.2 | Solyc09g014520.3 | Solyc10g006230.3 | Solyc10g007690.3 | Solyc12g006140.2 | Solyc12g009600.2 | Solyc12g011280.2 | Solyc12g011450.2
GO:0016143	S-glycoside metabolic process	8	7	1.56	45	0.0252	7.1e-05	4	3	Solyc01g074040.2 | Solyc04g079680.3 | Solyc09g059240.3 | Solyc09g066010.3	Solyc02g092860.3 | Solyc06g035700.1 | Solyc07g014670.3
GO:0019760	glucosinolate metabolic process	8	7	1.56	46	0.0252	7.1e-05	4	3	Solyc01g074040.2 | Solyc04g079680.3 | Solyc09g059240.3 | Solyc09g066010.3	Solyc02g092860.3 | Solyc06g035700.1 | Solyc07g014670.3
GO:0019757	glycosinolate metabolic process	8	7	1.56	47	0.0252	7.1e-05	4	3	Solyc01g074040.2 | Solyc04g079680.3 | Solyc09g059240.3 | Solyc09g066010.3	Solyc02g092860.3 | Solyc06g035700.1 | Solyc07g014670.3
GO:0009755	hormone-mediated signaling pathway	159	47	31.03	69	0.02728	0.0014	20	27	Solyc01g006650.2 | Solyc02g067030.3 | Solyc02g091840.3 | Solyc04g007690.3 | Solyc05g008060.3 | Solyc05g009170.2 | Solyc05g047460.3 | Solyc06g053830.3 | Solyc06g053840.3 | Solyc06g084070.3 | Solyc07g016180.3 | Solyc07g056580.3 | Solyc08g066420.1 | Solyc08g082180.3 | Solyc09g082580.3 | Solyc09g089610.3 | Solyc11g006180.2 | Solyc11g011260.1 | Solyc11g069190.2 | Solyc11g069500.2	Solyc01g096810.3 | Solyc01g098390.3 | Solyc02g032850.3 | Solyc02g063010.3 | Solyc02g069310.3 | Solyc02g071990.3 | Solyc02g083850.3 | Solyc03g005990.3 | Solyc03g033540.3 | Solyc03g093610.1 | Solyc03g121060.3 | Solyc03g122190.3 | Solyc05g015520.3 | Solyc05g056040.3 | Solyc07g042170.3 | Solyc07g056570.1 | Solyc07g064610.3 | Solyc08g036620.3 | Solyc08g036640.3 | Solyc09g074270.3 | Solyc10g079130.2 | …
GO:0019684	photosynthesis, light reaction	78	36	15.22	25	0.03241	7.8e-08	36	0	Solyc01g105030.3 | Solyc01g105050.3 | Solyc02g065400.3 | Solyc02g079950.3 | Solyc02g080540.1 | Solyc03g005760.1 | Solyc03g005770.2 | Solyc03g062720.3 | Solyc03g082970.3 | Solyc03g115900.3 | Solyc05g056050.3 | Solyc05g056070.3 | Solyc06g063360.3 | Solyc06g069730.3 | Solyc07g005510.3 | Solyc07g022900.3 | Solyc07g032640.2 | Solyc07g047850.3 | Solyc07g054290.1 | Solyc07g054820.3 | Solyc07g063600.3 | …
GO:0032870	cellular response to hormone stimulus	167	48	32.59	82	0.03851	0.00238	21	27	Solyc01g006650.2 | Solyc02g067030.3 | Solyc02g091840.3 | Solyc04g007690.3 | Solyc05g008060.3 | Solyc05g009170.2 | Solyc05g024260.3 | Solyc05g047460.3 | Solyc06g053830.3 | Solyc06g053840.3 | Solyc06g084070.3 | Solyc07g016180.3 | Solyc07g056580.3 | Solyc08g066420.1 | Solyc08g082180.3 | Solyc09g082580.3 | Solyc09g089610.3 | Solyc11g006180.2 | Solyc11g011260.1 | Solyc11g069190.2 | Solyc11g069500.2	Solyc01g096810.3 | Solyc01g098390.3 | Solyc02g032850.3 | Solyc02g063010.3 | Solyc02g069310.3 | Solyc02g071990.3 | Solyc02g083850.3 | Solyc03g005990.3 | Solyc03g033540.3 | Solyc03g093610.1 | Solyc03g121060.3 | Solyc03g122190.3 | Solyc05g015520.3 | Solyc05g056040.3 | Solyc07g042170.3 | Solyc07g056570.1 | Solyc07g064610.3 | Solyc08g036620.3 | Solyc08g036640.3 | Solyc09g074270.3 | Solyc10g079130.2 | …
GO:0071495	cellular response to endogenous stimulus	175	48	34.15	98	0.07617	0.00645	21	27	Solyc01g006650.2 | Solyc02g067030.3 | Solyc02g091840.3 | Solyc04g007690.3 | Solyc05g008060.3 | Solyc05g009170.2 | Solyc05g024260.3 | Solyc05g047460.3 | Solyc06g053830.3 | Solyc06g053840.3 | Solyc06g084070.3 | Solyc07g016180.3 | Solyc07g056580.3 | Solyc08g066420.1 | Solyc08g082180.3 | Solyc09g082580.3 | Solyc09g089610.3 | Solyc11g006180.2 | Solyc11g011260.1 | Solyc11g069190.2 | Solyc11g069500.2	Solyc01g096810.3 | Solyc01g098390.3 | Solyc02g032850.3 | Solyc02g063010.3 | Solyc02g069310.3 | Solyc02g071990.3 | Solyc02g083850.3 | Solyc03g005990.3 | Solyc03g033540.3 | Solyc03g093610.1 | Solyc03g121060.3 | Solyc03g122190.3 | Solyc05g015520.3 | Solyc05g056040.3 | Solyc07g042170.3 | Solyc07g056570.1 | Solyc07g064610.3 | Solyc08g036620.3 | Solyc08g036640.3 | Solyc09g074270.3 | Solyc10g079130.2 | …
GO:0051704	multi-organism process	184	64	35.91	31	0.14827	6.3e-07	23	41	Solyc01g005010.3 | Solyc03g080060.1 | Solyc03g121900.1 | Solyc04g008370.2 | Solyc04g077370.2 | Solyc04g078900.3 | Solyc05g015490.3 | Solyc05g023760.3 | Solyc05g047590.3 | Solyc05g052600.3 | Solyc05g055850.3 | Solyc06g050900.3 | Solyc07g053600.3 | Solyc07g054170.3 | Solyc07g063735.1 | Solyc08g061560.3 | Solyc09g009150.1 | Solyc09g011070.2 | Solyc09g091280.3 | Solyc10g007600.3 | Solyc11g008630.2 | …	Solyc01g005430.3 | Solyc01g067740.3 | Solyc01g108160.3 | Solyc01g108910.3 | Solyc01g109110.3 | Solyc01g112000.3 | Solyc02g032850.3 | Solyc02g069310.3 | Solyc02g072520.3 | Solyc02g077060.2 | Solyc02g079570.3 | Solyc02g079590.3 | Solyc02g079710.3 | Solyc02g082920.3 | Solyc03g078360.2 | Solyc03g095610.3 | Solyc03g095770.3 | Solyc03g119590.1 | Solyc04g007140.1 | Solyc04g077270.3 | Solyc05g009480.1 | …
GO:0006986	response to unfolded protein	15	8	2.93	85	0.14956	0.00358	2	6	Solyc03g117630.1 | Solyc09g075950.1	Solyc03g118040.3 | Solyc04g011440.3 | Solyc04g082890.3 | Solyc05g015530.3 | Solyc06g076020.3 | Solyc08g082820.3
GO:0034620	cellular response to unfolded protein	15	8	2.93	86	0.14956	0.00358	2	6	Solyc03g117630.1 | Solyc09g075950.1	Solyc03g118040.3 | Solyc04g011440.3 | Solyc04g082890.3 | Solyc05g015530.3 | Solyc06g076020.3 | Solyc08g082820.3
GO:2001141	regulation of RNA biosynthetic process	805	220	157.1	18	0.18652	8.5e-09	93	127	Solyc01g007810.1 | Solyc01g059870.3 | Solyc01g087690.2 | Solyc01g102740.3 | Solyc01g104650.3 | Solyc01g109550.2 | Solyc01g109700.3 | Solyc01g112190.3 | Solyc02g021430.1 | Solyc02g064960.3 | Solyc02g067230.3 | Solyc02g069855.1 | Solyc02g069860.3 | Solyc02g071260.3 | Solyc02g077950.2 | Solyc02g084240.3 | Solyc02g084420.3 | Solyc02g084590.3 | Solyc02g092070.3 | Solyc02g093130.2 | Solyc02g093150.3 | …	Solyc01g057460.3 | Solyc01g073910.3 | Solyc01g079260.3 | Solyc01g090300.3 | Solyc01g095100.3 | Solyc01g095460.3 | Solyc01g095630.3 | Solyc01g096320.3 | Solyc01g096810.3 | Solyc01g097330.3 | Solyc01g104740.3 | Solyc01g105810.3 | Solyc01g108130.3 | Solyc01g108240.3 | Solyc01g110310.3 | Solyc01g110480.3 | Solyc01g111580.3 | Solyc02g032950.3 | Solyc02g063520.3 | Solyc02g072000.3 | Solyc02g077370.1 | …
GO:1903506	regulation of nucleic acid-templated transcription	805	220	157.1	19	0.18652	8.5e-09	93	127	Solyc01g007810.1 | Solyc01g059870.3 | Solyc01g087690.2 | Solyc01g102740.3 | Solyc01g104650.3 | Solyc01g109550.2 | Solyc01g109700.3 | Solyc01g112190.3 | Solyc02g021430.1 | Solyc02g064960.3 | Solyc02g067230.3 | Solyc02g069855.1 | Solyc02g069860.3 | Solyc02g071260.3 | Solyc02g077950.2 | Solyc02g084240.3 | Solyc02g084420.3 | Solyc02g084590.3 | Solyc02g092070.3 | Solyc02g093130.2 | Solyc02g093150.3 | …	Solyc01g057460.3 | Solyc01g073910.3 | Solyc01g079260.3 | Solyc01g090300.3 | Solyc01g095100.3 | Solyc01g095460.3 | Solyc01g095630.3 | Solyc01g096320.3 | Solyc01g096810.3 | Solyc01g097330.3 | Solyc01g104740.3 | Solyc01g105810.3 | Solyc01g108130.3 | Solyc01g108240.3 | Solyc01g110310.3 | Solyc01g110480.3 | Solyc01g111580.3 | Solyc02g032950.3 | Solyc02g063520.3 | Solyc02g072000.3 | Solyc02g077370.1 | …
GO:0071310	cellular response to organic substance	222	58	43.32	104	0.18709	0.00901	23	35	Solyc01g006650.2 | Solyc02g067030.3 | Solyc02g091840.3 | Solyc03g117630.1 | Solyc04g007690.3 | Solyc05g008060.3 | Solyc05g009170.2 | Solyc05g024260.3 | Solyc05g047460.3 | Solyc06g053830.3 | Solyc06g053840.3 | Solyc06g084070.3 | Solyc07g016180.3 | Solyc07g056580.3 | Solyc08g066420.1 | Solyc08g082180.3 | Solyc09g075950.1 | Solyc09g082580.3 | Solyc09g089610.3 | Solyc11g006180.2 | Solyc11g011260.1 | …	Solyc01g067740.3 | Solyc01g096810.3 | Solyc01g098390.3 | Solyc02g032850.3 | Solyc02g063010.3 | Solyc02g069310.3 | Solyc02g071990.3 | Solyc02g083850.3 | Solyc03g005990.3 | Solyc03g033540.3 | Solyc03g093610.1 | Solyc03g118040.3 | Solyc03g121060.3 | Solyc03g122190.3 | Solyc04g011440.3 | Solyc04g082890.3 | Solyc05g015520.3 | Solyc05g015530.3 | Solyc05g056040.3 | Solyc06g076020.3 | Solyc07g042170.3 | …
GO:0009637	response to blue light	17	9	3.32	80	0.19126	0.00213	8	1	Solyc02g086350.3 | Solyc05g007480.1 | Solyc06g069880.1 | Solyc07g043130.3 | Solyc08g074560.3 | Solyc09g009420.1 | Solyc10g081340.1 | Solyc11g067080.2	Solyc11g068390.1
GO:0009605	response to external stimulus	184	57	35.91	48	0.30896	0.00012	27	30	Solyc01g059870.3 | Solyc01g107180.3 | Solyc02g067030.3 | Solyc02g071260.3 | Solyc02g092700.3 | Solyc03g080060.1 | Solyc03g121900.1 | Solyc05g007480.1 | Solyc05g015490.3 | Solyc05g023760.3 | Solyc05g047590.3 | Solyc05g052600.3 | Solyc05g055850.3 | Solyc06g050900.3 | Solyc06g069880.1 | Solyc07g043130.3 | Solyc07g053600.3 | Solyc08g061560.3 | Solyc08g074560.3 | Solyc09g011070.2 | Solyc10g007600.3 | …	Solyc01g005430.3 | Solyc01g067740.3 | Solyc01g108160.3 | Solyc01g108910.3 | Solyc01g109110.3 | Solyc02g032850.3 | Solyc02g069310.3 | Solyc02g072520.3 | Solyc02g077060.2 | Solyc02g082920.3 | Solyc03g095610.3 | Solyc03g095770.3 | Solyc03g111090.3 | Solyc03g116340.3 | Solyc03g119590.1 | Solyc04g007140.1 | Solyc05g009480.1 | Solyc05g050930.2 | Solyc05g053010.1 | Solyc06g005170.3 | Solyc06g035700.1 | …
GO:0044706	multi-multicellular organism process	53	21	10.34	62	0.37753	0.00056	5	16	Solyc04g008370.2 | Solyc04g077370.2 | Solyc04g078900.3 | Solyc07g063735.1 | Solyc09g009150.1	Solyc01g108910.3 | Solyc02g079570.3 | Solyc02g079590.3 | Solyc02g079710.3 | Solyc03g078360.2 | Solyc04g077270.3 | Solyc07g053220.2 | Solyc07g055690.2 | Solyc07g056570.1 | Solyc09g005120.3 | Solyc09g011330.2 | Solyc09g075910.1 | Solyc09g075920.1 | Solyc10g006690.3 | Solyc11g005630.1 | Solyc11g013880.1
GO:0009856	pollination	53	21	10.34	63	0.37753	0.00056	5	16	Solyc04g008370.2 | Solyc04g077370.2 | Solyc04g078900.3 | Solyc07g063735.1 | Solyc09g009150.1	Solyc01g108910.3 | Solyc02g079570.3 | Solyc02g079590.3 | Solyc02g079710.3 | Solyc03g078360.2 | Solyc04g077270.3 | Solyc07g053220.2 | Solyc07g055690.2 | Solyc07g056570.1 | Solyc09g005120.3 | Solyc09g011330.2 | Solyc09g075910.1 | Solyc09g075920.1 | Solyc10g006690.3 | Solyc11g005630.1 | Solyc11g013880.1
GO:0051707	response to other organism	114	38	22.25	56	0.42275	0.00032	14	24	Solyc03g080060.1 | Solyc03g121900.1 | Solyc05g015490.3 | Solyc05g023760.3 | Solyc05g047590.3 | Solyc05g052600.3 | Solyc05g055850.3 | Solyc06g050900.3 | Solyc07g053600.3 | Solyc08g061560.3 | Solyc09g011070.2 | Solyc10g007600.3 | Solyc11g065830.2 | Solyc12g056830.1	Solyc01g005430.3 | Solyc01g067740.3 | Solyc01g108160.3 | Solyc01g109110.3 | Solyc02g032850.3 | Solyc02g069310.3 | Solyc02g072520.3 | Solyc02g077060.2 | Solyc02g082920.3 | Solyc03g095610.3 | Solyc03g095770.3 | Solyc03g119590.1 | Solyc04g007140.1 | Solyc05g009480.1 | Solyc05g053010.1 | Solyc06g005170.3 | Solyc06g035700.1 | Solyc07g008620.1 | Solyc07g049530.3 | Solyc09g005000.1 | Solyc09g008670.3 | …
GO:0043207	response to external biotic stimulus	114	38	22.25	57	0.42275	0.00032	14	24	Solyc03g080060.1 | Solyc03g121900.1 | Solyc05g015490.3 | Solyc05g023760.3 | Solyc05g047590.3 | Solyc05g052600.3 | Solyc05g055850.3 | Solyc06g050900.3 | Solyc07g053600.3 | Solyc08g061560.3 | Solyc09g011070.2 | Solyc10g007600.3 | Solyc11g065830.2 | Solyc12g056830.1	Solyc01g005430.3 | Solyc01g067740.3 | Solyc01g108160.3 | Solyc01g109110.3 | Solyc02g032850.3 | Solyc02g069310.3 | Solyc02g072520.3 | Solyc02g077060.2 | Solyc02g082920.3 | Solyc03g095610.3 | Solyc03g095770.3 | Solyc03g119590.1 | Solyc04g007140.1 | Solyc05g009480.1 | Solyc05g053010.1 | Solyc06g005170.3 | Solyc06g035700.1 | Solyc07g008620.1 | Solyc07g049530.3 | Solyc09g005000.1 | Solyc09g008670.3 | …
GO:0009725	response to hormone	304	94	59.33	33	0.43209	8.9e-07	46	48	Solyc01g006650.2 | Solyc01g091030.3 | Solyc01g110560.3 | Solyc01g110590.3 | Solyc01g110605.1 | Solyc01g110670.3 | Solyc01g110730.3 | Solyc01g110920.3 | Solyc01g110940.3 | Solyc01g110970.3 | Solyc02g067030.3 | Solyc02g091840.3 | Solyc03g033590.1 | Solyc03g082510.1 | Solyc03g119690.2 | Solyc03g119740.3 | Solyc04g007690.3 | Solyc04g078900.3 | Solyc05g008060.3 | Solyc05g009170.2 | Solyc05g024260.3 | …	Solyc01g096810.3 | Solyc01g098390.3 | Solyc01g104740.3 | Solyc01g109920.2 | Solyc01g110843.1 | Solyc02g032850.3 | Solyc02g063010.3 | Solyc02g069310.3 | Solyc02g071990.3 | Solyc02g072520.3 | Solyc02g083850.3 | Solyc03g005990.3 | Solyc03g033540.3 | Solyc03g051970.3 | Solyc03g082520.1 | Solyc03g082530.1 | Solyc03g093610.1 | Solyc03g095770.3 | Solyc03g111090.3 | Solyc03g121060.3 | Solyc03g122190.3 | …
GO:0009628	response to abiotic stimulus	344	94	67.13	50	0.4494	0.00021	53	41	Solyc01g059870.3 | Solyc01g074040.2 | Solyc01g098190.3 | Solyc01g105030.3 | Solyc01g105050.3 | Solyc01g107180.3 | Solyc01g109550.2 | Solyc02g067030.3 | Solyc02g071260.3 | Solyc02g084420.3 | Solyc02g086350.3 | Solyc02g087400.1 | Solyc03g005760.1 | Solyc03g005770.2 | Solyc03g006880.3 | Solyc03g114450.3 | Solyc03g117630.1 | Solyc03g119690.2 | Solyc04g078900.3 | Solyc05g007480.1 | Solyc05g024260.3 | …	Solyc01g067740.3 | Solyc01g079200.3 | Solyc01g086960.3 | Solyc01g095140.3 | Solyc01g095150.3 | Solyc01g096030.3 | Solyc01g099680.3 | Solyc01g104740.3 | Solyc01g109920.2 | Solyc02g032850.3 | Solyc02g072000.3 | Solyc02g072520.3 | Solyc02g090820.3 | Solyc03g006000.3 | Solyc03g097270.3 | Solyc03g111090.3 | Solyc04g005480.1 | Solyc04g073990.3 | Solyc04g074520.1 | Solyc05g050930.2 | Solyc05g055160.3 | …
GO:0009753	response to jasmonic acid	33	13	6.44	99	0.52021	0.00651	2	11	Solyc06g036305.1 | Solyc11g011260.1	Solyc02g032850.3 | Solyc02g069310.3 | Solyc03g095770.3 | Solyc03g122190.3 | Solyc07g042170.3 | Solyc08g036620.3 | Solyc08g036640.3 | Solyc08g078340.3 | Solyc11g011030.2 | Solyc12g009220.2 | Solyc12g049400.2
GO:0009607	response to biotic stimulus	127	40	24.78	66	0.53574	0.00082	14	26	Solyc03g080060.1 | Solyc03g121900.1 | Solyc05g015490.3 | Solyc05g023760.3 | Solyc05g047590.3 | Solyc05g052600.3 | Solyc05g055850.3 | Solyc06g050900.3 | Solyc07g053600.3 | Solyc08g061560.3 | Solyc09g011070.2 | Solyc10g007600.3 | Solyc11g065830.2 | Solyc12g056830.1	Solyc01g005430.3 | Solyc01g067740.3 | Solyc01g108160.3 | Solyc01g109110.3 | Solyc02g032850.3 | Solyc02g069310.3 | Solyc02g072520.3 | Solyc02g077060.2 | Solyc02g082920.3 | Solyc03g095610.3 | Solyc03g095770.3 | Solyc03g119590.1 | Solyc04g007140.1 | Solyc05g009480.1 | Solyc05g053010.1 | Solyc06g005170.3 | Solyc06g035700.1 | Solyc07g008620.1 | Solyc07g049530.3 | Solyc09g005000.1 | Solyc09g008670.3 | …
GO:0009719	response to endogenous stimulus	312	94	60.89	35	0.55546	3.1e-06	46	48	Solyc01g006650.2 | Solyc01g091030.3 | Solyc01g110560.3 | Solyc01g110590.3 | Solyc01g110605.1 | Solyc01g110670.3 | Solyc01g110730.3 | Solyc01g110920.3 | Solyc01g110940.3 | Solyc01g110970.3 | Solyc02g067030.3 | Solyc02g091840.3 | Solyc03g033590.1 | Solyc03g082510.1 | Solyc03g119690.2 | Solyc03g119740.3 | Solyc04g007690.3 | Solyc04g078900.3 | Solyc05g008060.3 | Solyc05g009170.2 | Solyc05g024260.3 | …	Solyc01g096810.3 | Solyc01g098390.3 | Solyc01g104740.3 | Solyc01g109920.2 | Solyc01g110843.1 | Solyc02g032850.3 | Solyc02g063010.3 | Solyc02g069310.3 | Solyc02g071990.3 | Solyc02g072520.3 | Solyc02g083850.3 | Solyc03g005990.3 | Solyc03g033540.3 | Solyc03g051970.3 | Solyc03g082520.1 | Solyc03g082530.1 | Solyc03g093610.1 | Solyc03g095770.3 | Solyc03g111090.3 | Solyc03g121060.3 | Solyc03g122190.3 | …
GO:0031323	regulation of cellular metabolic process	1073	271	209.4	29	0.60882	4.2e-07	113	158	Solyc01g007810.1 | Solyc01g059870.3 | Solyc01g087690.2 | Solyc01g089850.3 | Solyc01g096870.3 | Solyc01g102740.3 | Solyc01g104650.3 | Solyc01g109550.2 | Solyc01g109700.3 | Solyc01g112190.3 | Solyc02g021430.1 | Solyc02g064960.3 | Solyc02g065400.3 | Solyc02g067030.3 | Solyc02g067230.3 | Solyc02g069855.1 | Solyc02g069860.3 | Solyc02g071260.3 | Solyc02g077950.2 | Solyc02g084240.3 | Solyc02g084420.3 | …	Solyc01g057460.3 | Solyc01g067740.3 | Solyc01g073910.3 | Solyc01g079260.3 | Solyc01g090300.3 | Solyc01g095100.3 | Solyc01g095460.3 | Solyc01g095630.3 | Solyc01g096320.3 | Solyc01g096810.3 | Solyc01g097330.3 | Solyc01g104740.3 | Solyc01g105810.3 | Solyc01g108130.3 | Solyc01g108240.3 | Solyc01g110310.3 | Solyc01g110480.3 | Solyc01g111580.3 | Solyc02g032850.3 | Solyc02g032950.3 | Solyc02g063520.3 | …
GO:0031326	regulation of cellular biosynthetic process	892	238	174.07	21	0.61481	1.9e-08	99	139	Solyc01g007810.1 | Solyc01g059870.3 | Solyc01g087690.2 | Solyc01g102740.3 | Solyc01g104650.3 | Solyc01g109550.2 | Solyc01g109700.3 | Solyc01g112190.3 | Solyc02g021430.1 | Solyc02g064960.3 | Solyc02g067230.3 | Solyc02g069855.1 | Solyc02g069860.3 | Solyc02g071260.3 | Solyc02g077950.2 | Solyc02g084240.3 | Solyc02g084420.3 | Solyc02g084590.3 | Solyc02g092070.3 | Solyc02g093130.2 | Solyc02g093150.3 | …	Solyc01g057460.3 | Solyc01g067740.3 | Solyc01g073910.3 | Solyc01g079260.3 | Solyc01g090300.3 | Solyc01g095100.3 | Solyc01g095460.3 | Solyc01g095630.3 | Solyc01g096320.3 | Solyc01g096810.3 | Solyc01g097330.3 | Solyc01g104740.3 | Solyc01g105810.3 | Solyc01g108130.3 | Solyc01g108240.3 | Solyc01g110310.3 | Solyc01g110480.3 | Solyc01g111580.3 | Solyc02g032850.3 | Solyc02g032950.3 | Solyc02g063520.3 | …
GO:0001101	response to acid chemical	191	55	37.27	67	0.62475	0.00114	18	37	Solyc02g067030.3 | Solyc02g068080.3 | Solyc03g119690.2 | Solyc03g119740.3 | Solyc04g078900.3 | Solyc05g009170.2 | Solyc05g024260.3 | Solyc06g036305.1 | Solyc07g053180.3 | Solyc08g007430.2 | Solyc08g066420.1 | Solyc08g074560.3 | Solyc08g077170.3 | Solyc08g082180.3 | Solyc10g005050.3 | Solyc11g011260.1 | Solyc11g069430.2 | Solyc12g056220.2	Solyc01g067740.3 | Solyc01g086960.3 | Solyc01g095140.3 | Solyc01g095150.3 | Solyc01g098390.3 | Solyc01g099680.3 | Solyc01g104740.3 | Solyc01g109920.2 | Solyc02g032850.3 | Solyc02g069310.3 | Solyc02g083850.3 | Solyc03g033540.3 | Solyc03g051970.3 | Solyc03g095770.3 | Solyc03g097270.3 | Solyc03g111090.3 | Solyc03g122190.3 | Solyc04g073990.3 | Solyc06g005170.3 | Solyc07g042170.3 | Solyc07g049530.3 | …
GO:0019222	regulation of metabolic process	1159	286	226.18	34	0.6494	1.7e-06	117	169	Solyc01g007810.1 | Solyc01g010970.3 | Solyc01g059870.3 | Solyc01g087690.2 | Solyc01g089850.3 | Solyc01g096870.3 | Solyc01g102740.3 | Solyc01g104650.3 | Solyc01g109550.2 | Solyc01g109700.3 | Solyc01g112190.3 | Solyc02g021430.1 | Solyc02g064960.3 | Solyc02g065400.3 | Solyc02g067030.3 | Solyc02g067230.3 | Solyc02g069855.1 | Solyc02g069860.3 | Solyc02g071260.3 | Solyc02g077950.2 | Solyc02g084240.3 | …	Solyc01g057460.3 | Solyc01g067740.3 | Solyc01g073910.3 | Solyc01g079260.3 | Solyc01g090300.3 | Solyc01g095100.3 | Solyc01g095460.3 | Solyc01g095630.3 | Solyc01g096320.3 | Solyc01g096810.3 | Solyc01g097330.3 | Solyc01g101140.3 | Solyc01g104740.3 | Solyc01g105810.3 | Solyc01g108130.3 | Solyc01g108240.3 | Solyc01g110310.3 | Solyc01g110480.3 | Solyc01g111580.3 | Solyc02g032850.3 | Solyc02g032950.3 | …
GO:0036211	protein modification process	1376	365	268.53	3	0.67295	1.7e-12	133	232	Solyc01g007130.3 | Solyc01g059870.3 | Solyc01g066870.3 | Solyc01g067360.3 | Solyc01g089850.3 | Solyc01g098410.3 | Solyc01g098740.3 | Solyc01g105030.3 | Solyc01g105050.3 | Solyc01g105670.3 | Solyc01g105710.3 | Solyc02g021590.3 | Solyc02g067030.3 | Solyc02g071260.3 | Solyc02g072540.3 | Solyc02g081470.3 | Solyc02g083570.3 | Solyc02g087040.1 | Solyc02g091840.3 | Solyc02g091860.3 | Solyc03g005760.1 | …	Solyc00g007060.3 | Solyc01g005160.3 | Solyc01g007010.3 | Solyc01g007025.1 | Solyc01g007040.3 | Solyc01g008497.1 | Solyc01g008500.3 | Solyc01g010660.3 | Solyc01g067020.3 | Solyc01g068000.3 | Solyc01g081297.1 | Solyc01g086960.3 | Solyc01g087060.3 | Solyc01g087620.3 | Solyc01g087870.3 | Solyc01g088440.2 | Solyc01g088690.3 | Solyc01g094020.3 | Solyc01g096200.3 | Solyc01g097840.3 | Solyc01g100040.3 | …
GO:0006464	cellular protein modification process	1376	365	268.53	4	0.67295	1.7e-12	133	232	Solyc01g007130.3 | Solyc01g059870.3 | Solyc01g066870.3 | Solyc01g067360.3 | Solyc01g089850.3 | Solyc01g098410.3 | Solyc01g098740.3 | Solyc01g105030.3 | Solyc01g105050.3 | Solyc01g105670.3 | Solyc01g105710.3 | Solyc02g021590.3 | Solyc02g067030.3 | Solyc02g071260.3 | Solyc02g072540.3 | Solyc02g081470.3 | Solyc02g083570.3 | Solyc02g087040.1 | Solyc02g091840.3 | Solyc02g091860.3 | Solyc03g005760.1 | …	Solyc00g007060.3 | Solyc01g005160.3 | Solyc01g007010.3 | Solyc01g007025.1 | Solyc01g007040.3 | Solyc01g008497.1 | Solyc01g008500.3 | Solyc01g010660.3 | Solyc01g067020.3 | Solyc01g068000.3 | Solyc01g081297.1 | Solyc01g086960.3 | Solyc01g087060.3 | Solyc01g087620.3 | Solyc01g087870.3 | Solyc01g088440.2 | Solyc01g088690.3 | Solyc01g094020.3 | Solyc01g096200.3 | Solyc01g097840.3 | Solyc01g100040.3 | …
GO:0009889	regulation of biosynthetic process	896	238	174.85	23	0.68971	3e-08	99	139	Solyc01g007810.1 | Solyc01g059870.3 | Solyc01g087690.2 | Solyc01g102740.3 | Solyc01g104650.3 | Solyc01g109550.2 | Solyc01g109700.3 | Solyc01g112190.3 | Solyc02g021430.1 | Solyc02g064960.3 | Solyc02g067230.3 | Solyc02g069855.1 | Solyc02g069860.3 | Solyc02g071260.3 | Solyc02g077950.2 | Solyc02g084240.3 | Solyc02g084420.3 | Solyc02g084590.3 | Solyc02g092070.3 | Solyc02g093130.2 | Solyc02g093150.3 | …	Solyc01g057460.3 | Solyc01g067740.3 | Solyc01g073910.3 | Solyc01g079260.3 | Solyc01g090300.3 | Solyc01g095100.3 | Solyc01g095460.3 | Solyc01g095630.3 | Solyc01g096320.3 | Solyc01g096810.3 | Solyc01g097330.3 | Solyc01g104740.3 | Solyc01g105810.3 | Solyc01g108130.3 | Solyc01g108240.3 | Solyc01g110310.3 | Solyc01g110480.3 | Solyc01g111580.3 | Solyc02g032850.3 | Solyc02g032950.3 | Solyc02g063520.3 | …
GO:0010556	regulation of macromolecule biosynthetic process	875	231	170.76	26	0.69503	8.6e-08	97	134	Solyc01g007810.1 | Solyc01g059870.3 | Solyc01g087690.2 | Solyc01g102740.3 | Solyc01g104650.3 | Solyc01g109550.2 | Solyc01g109700.3 | Solyc01g112190.3 | Solyc02g021430.1 | Solyc02g064960.3 | Solyc02g067230.3 | Solyc02g069855.1 | Solyc02g069860.3 | Solyc02g071260.3 | Solyc02g077950.2 | Solyc02g084240.3 | Solyc02g084420.3 | Solyc02g084590.3 | Solyc02g092070.3 | Solyc02g093130.2 | Solyc02g093150.3 | …	Solyc01g057460.3 | Solyc01g067740.3 | Solyc01g073910.3 | Solyc01g079260.3 | Solyc01g090300.3 | Solyc01g095100.3 | Solyc01g095460.3 | Solyc01g095630.3 | Solyc01g096320.3 | Solyc01g096810.3 | Solyc01g097330.3 | Solyc01g104740.3 | Solyc01g105810.3 | Solyc01g108130.3 | Solyc01g108240.3 | Solyc01g110310.3 | Solyc01g110480.3 | Solyc01g111580.3 | Solyc02g032950.3 | Solyc02g063520.3 | Solyc02g072000.3 | …
GO:0006796	phosphate-containing compound metabolic process	1251	333	244.13	5	0.71168	1.4e-11	128	205	Solyc01g007130.3 | Solyc01g008780.3 | Solyc01g057210.3 | Solyc01g059870.3 | Solyc01g066870.3 | Solyc01g089850.3 | Solyc01g096410.3 | Solyc01g098410.3 | Solyc01g098740.3 | Solyc01g105670.3 | Solyc01g110520.3 | Solyc02g021590.3 | Solyc02g062340.3 | Solyc02g067030.3 | Solyc02g069620.3 | Solyc02g071260.3 | Solyc02g072540.3 | Solyc02g080540.1 | Solyc02g081470.3 | Solyc02g083670.3 | Solyc02g084440.3 | …	Solyc00g007060.3 | Solyc01g008497.1 | Solyc01g008500.3 | Solyc01g008560.3 | Solyc01g010660.3 | Solyc01g067020.3 | Solyc01g068000.3 | Solyc01g081297.1 | Solyc01g087870.3 | Solyc01g088480.3 | Solyc01g088690.3 | Solyc01g094020.3 | Solyc01g097840.3 | Solyc01g100040.3 | Solyc01g102700.3 | Solyc01g103220.3 | Solyc01g103940.3 | Solyc01g105280.3 | Solyc01g106500.3 | Solyc01g107300.3 | Solyc01g108840.3 | …
GO:0006952	defense response	183	54	35.71	64	0.73177	0.00067	11	43	Solyc03g080060.1 | Solyc03g121900.1 | Solyc05g015490.3 | Solyc05g023760.3 | Solyc05g052600.3 | Solyc05g055850.3 | Solyc07g053600.3 | Solyc08g061560.3 | Solyc09g011070.2 | Solyc10g007600.3 | Solyc12g056830.1	Solyc01g005430.3 | Solyc01g067740.3 | Solyc01g090430.3 | Solyc01g103490.3 | Solyc01g108160.3 | Solyc01g109110.3 | Solyc02g032850.3 | Solyc02g069310.3 | Solyc02g071780.3 | Solyc02g077060.2 | Solyc02g077370.1 | Solyc02g082920.3 | Solyc03g093610.1 | Solyc03g095610.3 | Solyc03g095770.3 | Solyc03g119590.1 | Solyc03g122190.3 | Solyc04g007140.1 | Solyc04g054690.3 | Solyc04g079730.1 | Solyc05g009480.1 | …
GO:0050789	regulation of biological process	1788	445	348.93	8	0.75427	1.2e-10	179	266	Solyc01g006650.2 | Solyc01g007810.1 | Solyc01g008240.3 | Solyc01g010970.3 | Solyc01g059870.3 | Solyc01g087690.2 | Solyc01g089850.3 | Solyc01g096360.3 | Solyc01g096870.3 | Solyc01g098190.3 | Solyc01g102740.3 | Solyc01g102850.2 | Solyc01g104030.3 | Solyc01g104650.3 | Solyc01g109550.2 | Solyc01g109700.3 | Solyc01g112190.3 | Solyc02g021430.1 | Solyc02g032860.3 | Solyc02g064960.3 | Solyc02g065400.3 | …	Solyc01g014840.3 | Solyc01g057460.3 | Solyc01g067740.3 | Solyc01g073910.3 | Solyc01g079260.3 | Solyc01g087060.3 | Solyc01g088560.3 | Solyc01g090300.3 | Solyc01g095100.3 | Solyc01g095460.3 | Solyc01g095630.3 | Solyc01g096320.3 | Solyc01g096810.3 | Solyc01g097330.3 | Solyc01g097840.3 | Solyc01g098390.3 | Solyc01g099520.3 | Solyc01g099680.3 | Solyc01g101140.3 | Solyc01g102840.3 | Solyc01g102880.2 | …
GO:2000112	regulation of cellular macromolecule biosynthetic process	873	230	170.37	27	0.76448	1.1e-07	97	133	Solyc01g007810.1 | Solyc01g059870.3 | Solyc01g087690.2 | Solyc01g102740.3 | Solyc01g104650.3 | Solyc01g109550.2 | Solyc01g109700.3 | Solyc01g112190.3 | Solyc02g021430.1 | Solyc02g064960.3 | Solyc02g067230.3 | Solyc02g069855.1 | Solyc02g069860.3 | Solyc02g071260.3 | Solyc02g077950.2 | Solyc02g084240.3 | Solyc02g084420.3 | Solyc02g084590.3 | Solyc02g092070.3 | Solyc02g093130.2 | Solyc02g093150.3 | …	Solyc01g057460.3 | Solyc01g067740.3 | Solyc01g073910.3 | Solyc01g079260.3 | Solyc01g090300.3 | Solyc01g095100.3 | Solyc01g095460.3 | Solyc01g095630.3 | Solyc01g096320.3 | Solyc01g096810.3 | Solyc01g097330.3 | Solyc01g105810.3 | Solyc01g108130.3 | Solyc01g108240.3 | Solyc01g110310.3 | Solyc01g110480.3 | Solyc01g111580.3 | Solyc02g032950.3 | Solyc02g063520.3 | Solyc02g072000.3 | Solyc02g077370.1 | …
GO:0065007	biological regulation	1943	471	379.18	14	0.78672	1.8e-09	192	279	Solyc01g006650.2 | Solyc01g007810.1 | Solyc01g008240.3 | Solyc01g010970.3 | Solyc01g059870.3 | Solyc01g087690.2 | Solyc01g089850.3 | Solyc01g096360.3 | Solyc01g096660.3 | Solyc01g096870.3 | Solyc01g098190.3 | Solyc01g102740.3 | Solyc01g102850.2 | Solyc01g104030.3 | Solyc01g104650.3 | Solyc01g109550.2 | Solyc01g109700.3 | Solyc01g112190.3 | Solyc02g021430.1 | Solyc02g032860.3 | Solyc02g064960.3 | …	Solyc01g014840.3 | Solyc01g057460.3 | Solyc01g057770.3 | Solyc01g067740.3 | Solyc01g073910.3 | Solyc01g079260.3 | Solyc01g087060.3 | Solyc01g088560.3 | Solyc01g090300.3 | Solyc01g091850.3 | Solyc01g095100.3 | Solyc01g095460.3 | Solyc01g095630.3 | Solyc01g096320.3 | Solyc01g096810.3 | Solyc01g096930.3 | Solyc01g097330.3 | Solyc01g097840.3 | Solyc01g098390.3 | Solyc01g099520.3 | Solyc01g099680.3 | …
GO:0010033	response to organic substance	379	109	73.96	40	0.79004	5.8e-06	51	58	Solyc01g006650.2 | Solyc01g091030.3 | Solyc01g110560.3 | Solyc01g110590.3 | Solyc01g110605.1 | Solyc01g110670.3 | Solyc01g110730.3 | Solyc01g110920.3 | Solyc01g110940.3 | Solyc01g110970.3 | Solyc02g067030.3 | Solyc02g091840.3 | Solyc03g033590.1 | Solyc03g082510.1 | Solyc03g117630.1 | Solyc03g119690.2 | Solyc03g119740.3 | Solyc04g007690.3 | Solyc04g014690.3 | Solyc04g078900.3 | Solyc05g008060.3 | …	Solyc01g067740.3 | Solyc01g096810.3 | Solyc01g098390.3 | Solyc01g104740.3 | Solyc01g109920.2 | Solyc01g110843.1 | Solyc02g032850.3 | Solyc02g063010.3 | Solyc02g069310.3 | Solyc02g071990.3 | Solyc02g072520.3 | Solyc02g083850.3 | Solyc02g093050.3 | Solyc03g005990.3 | Solyc03g033540.3 | Solyc03g051970.3 | Solyc03g082520.1 | Solyc03g082530.1 | Solyc03g093610.1 | Solyc03g095770.3 | Solyc03g111090.3 | …
GO:1901700	response to oxygen-containing compound	264	70	51.52	83	0.79326	0.00299	23	47	Solyc02g067030.3 | Solyc02g068080.3 | Solyc03g119690.2 | Solyc03g119740.3 | Solyc04g014690.3 | Solyc04g078900.3 | Solyc05g009170.2 | Solyc05g024260.3 | Solyc06g036305.1 | Solyc07g053180.3 | Solyc08g007430.2 | Solyc08g066420.1 | Solyc08g074560.3 | Solyc08g077170.3 | Solyc08g082180.3 | Solyc09g075950.1 | Solyc10g005050.3 | Solyc10g080080.2 | Solyc11g011260.1 | Solyc11g069430.2 | Solyc12g006860.2 | …	Solyc01g067740.3 | Solyc01g086960.3 | Solyc01g095140.3 | Solyc01g095150.3 | Solyc01g098390.3 | Solyc01g099680.3 | Solyc01g104740.3 | Solyc01g109920.2 | Solyc02g032850.3 | Solyc02g063010.3 | Solyc02g069310.3 | Solyc02g071990.3 | Solyc02g083850.3 | Solyc02g093050.3 | Solyc03g005990.3 | Solyc03g033540.3 | Solyc03g051970.3 | Solyc03g095770.3 | Solyc03g097270.3 | Solyc03g111090.3 | Solyc03g122190.3 | …
GO:0007154	cell communication	538	166	104.99	6	0.79535	5.1e-11	56	110	Solyc01g006650.2 | Solyc01g059870.3 | Solyc01g096360.3 | Solyc01g102850.2 | Solyc02g067030.3 | Solyc02g071260.3 | Solyc02g072540.3 | Solyc02g083670.3 | Solyc02g091840.3 | Solyc02g092110.3 | Solyc03g095510.3 | Solyc04g007690.3 | Solyc04g008370.2 | Solyc04g077370.2 | Solyc05g006420.3 | Solyc05g008060.3 | Solyc05g009170.2 | Solyc05g047460.3 | Solyc05g049970.3 | Solyc05g052270.2 | Solyc05g053210.3 | …	Solyc01g014840.3 | Solyc01g088560.3 | Solyc01g096810.3 | Solyc01g097840.3 | Solyc01g098390.3 | Solyc01g099520.3 | Solyc01g102840.3 | Solyc01g102880.2 | Solyc01g103940.3 | Solyc01g105810.3 | Solyc01g109110.3 | Solyc01g112350.3 | Solyc02g021440.3 | Solyc02g032850.3 | Solyc02g063010.3 | Solyc02g064980.1 | Solyc02g068680.1 | Solyc02g069310.3 | Solyc02g071220.3 | Solyc02g071990.3 | Solyc02g079570.3 | …
GO:0006793	phosphorus metabolic process	1276	335	249.01	7	0.80287	8e-11	129	206	Solyc01g007130.3 | Solyc01g008780.3 | Solyc01g057210.3 | Solyc01g059870.3 | Solyc01g066870.3 | Solyc01g089850.3 | Solyc01g096410.3 | Solyc01g098410.3 | Solyc01g098740.3 | Solyc01g105670.3 | Solyc01g110520.3 | Solyc02g021590.3 | Solyc02g062340.3 | Solyc02g067030.3 | Solyc02g069620.3 | Solyc02g071260.3 | Solyc02g072540.3 | Solyc02g080540.1 | Solyc02g081470.3 | Solyc02g083670.3 | Solyc02g084440.3 | …	Solyc00g007060.3 | Solyc01g008497.1 | Solyc01g008500.3 | Solyc01g008560.3 | Solyc01g010660.3 | Solyc01g067020.3 | Solyc01g068000.3 | Solyc01g081297.1 | Solyc01g087870.3 | Solyc01g088480.3 | Solyc01g088690.3 | Solyc01g094020.3 | Solyc01g097840.3 | Solyc01g100040.3 | Solyc01g102700.3 | Solyc01g103220.3 | Solyc01g103940.3 | Solyc01g105280.3 | Solyc01g106500.3 | Solyc01g107300.3 | Solyc01g108840.3 | …
GO:0010468	regulation of gene expression	948	242	185	32	0.82637	8.2e-07	99	143	Solyc01g007810.1 | Solyc01g010970.3 | Solyc01g059870.3 | Solyc01g087690.2 | Solyc01g102740.3 | Solyc01g104650.3 | Solyc01g109550.2 | Solyc01g109700.3 | Solyc01g112190.3 | Solyc02g021430.1 | Solyc02g064960.3 | Solyc02g067230.3 | Solyc02g069855.1 | Solyc02g069860.3 | Solyc02g071260.3 | Solyc02g077950.2 | Solyc02g084240.3 | Solyc02g084420.3 | Solyc02g084590.3 | Solyc02g092070.3 | Solyc02g093130.2 | …	Solyc01g057460.3 | Solyc01g067740.3 | Solyc01g073910.3 | Solyc01g079260.3 | Solyc01g090300.3 | Solyc01g095100.3 | Solyc01g095460.3 | Solyc01g095630.3 | Solyc01g096320.3 | Solyc01g096810.3 | Solyc01g097330.3 | Solyc01g101140.3 | Solyc01g105810.3 | Solyc01g108130.3 | Solyc01g108240.3 | Solyc01g110310.3 | Solyc01g110480.3 | Solyc01g111580.3 | Solyc02g032950.3 | Solyc02g063520.3 | Solyc02g069260.3 | …
GO:0060255	regulation of macromolecule metabolic process	1104	269	215.44	41	0.83572	1.1e-05	106	163	Solyc01g007810.1 | Solyc01g010970.3 | Solyc01g059870.3 | Solyc01g087690.2 | Solyc01g089850.3 | Solyc01g102740.3 | Solyc01g104650.3 | Solyc01g109550.2 | Solyc01g109700.3 | Solyc01g112190.3 | Solyc02g021430.1 | Solyc02g064960.3 | Solyc02g067230.3 | Solyc02g069855.1 | Solyc02g069860.3 | Solyc02g071260.3 | Solyc02g077950.2 | Solyc02g084240.3 | Solyc02g084420.3 | Solyc02g084590.3 | Solyc02g092070.3 | …	Solyc01g057460.3 | Solyc01g067740.3 | Solyc01g073910.3 | Solyc01g079260.3 | Solyc01g090300.3 | Solyc01g095100.3 | Solyc01g095460.3 | Solyc01g095630.3 | Solyc01g096320.3 | Solyc01g096810.3 | Solyc01g097330.3 | Solyc01g101140.3 | Solyc01g104740.3 | Solyc01g105810.3 | Solyc01g108130.3 | Solyc01g108240.3 | Solyc01g110310.3 | Solyc01g110480.3 | Solyc01g111580.3 | Solyc02g032950.3 | Solyc02g063520.3 | …
GO:0051171	regulation of nitrogen compound metabolic process	1032	256	201.39	37	0.85156	4.4e-06	103	153	Solyc01g007810.1 | Solyc01g059870.3 | Solyc01g087690.2 | Solyc01g089850.3 | Solyc01g102740.3 | Solyc01g104650.3 | Solyc01g109550.2 | Solyc01g109700.3 | Solyc01g112190.3 | Solyc02g021430.1 | Solyc02g064960.3 | Solyc02g067230.3 | Solyc02g069855.1 | Solyc02g069860.3 | Solyc02g071260.3 | Solyc02g077950.2 | Solyc02g084240.3 | Solyc02g084420.3 | Solyc02g084590.3 | Solyc02g092070.3 | Solyc02g093130.2 | …	Solyc01g057460.3 | Solyc01g067740.3 | Solyc01g073910.3 | Solyc01g079260.3 | Solyc01g090300.3 | Solyc01g095100.3 | Solyc01g095460.3 | Solyc01g095630.3 | Solyc01g096320.3 | Solyc01g096810.3 | Solyc01g097330.3 | Solyc01g104740.3 | Solyc01g105810.3 | Solyc01g108130.3 | Solyc01g108240.3 | Solyc01g110310.3 | Solyc01g110480.3 | Solyc01g111580.3 | Solyc02g032850.3 | Solyc02g032950.3 | Solyc02g063520.3 | …
GO:0050794	regulation of cellular process	1630	411	318.09	10	0.88879	1.3e-10	167	244	Solyc01g006650.2 | Solyc01g007810.1 | Solyc01g008240.3 | Solyc01g059870.3 | Solyc01g087690.2 | Solyc01g089850.3 | Solyc01g096360.3 | Solyc01g096870.3 | Solyc01g098190.3 | Solyc01g102740.3 | Solyc01g102850.2 | Solyc01g104650.3 | Solyc01g109550.2 | Solyc01g109700.3 | Solyc01g112190.3 | Solyc02g021430.1 | Solyc02g032860.3 | Solyc02g064960.3 | Solyc02g065400.3 | Solyc02g067030.3 | Solyc02g067230.3 | …	Solyc01g014840.3 | Solyc01g057460.3 | Solyc01g067740.3 | Solyc01g073910.3 | Solyc01g079260.3 | Solyc01g088560.3 | Solyc01g090300.3 | Solyc01g095100.3 | Solyc01g095460.3 | Solyc01g095630.3 | Solyc01g096320.3 | Solyc01g096810.3 | Solyc01g097330.3 | Solyc01g097840.3 | Solyc01g098390.3 | Solyc01g099520.3 | Solyc01g102840.3 | Solyc01g102880.2 | Solyc01g103940.3 | Solyc01g104740.3 | Solyc01g105810.3 | …
GO:0051252	regulation of RNA metabolic process	832	222	162.36	24	0.91613	6.4e-08	93	129	Solyc01g007810.1 | Solyc01g059870.3 | Solyc01g087690.2 | Solyc01g102740.3 | Solyc01g104650.3 | Solyc01g109550.2 | Solyc01g109700.3 | Solyc01g112190.3 | Solyc02g021430.1 | Solyc02g064960.3 | Solyc02g067230.3 | Solyc02g069855.1 | Solyc02g069860.3 | Solyc02g071260.3 | Solyc02g077950.2 | Solyc02g084240.3 | Solyc02g084420.3 | Solyc02g084590.3 | Solyc02g092070.3 | Solyc02g093130.2 | Solyc02g093150.3 | …	Solyc01g057460.3 | Solyc01g073910.3 | Solyc01g079260.3 | Solyc01g090300.3 | Solyc01g095100.3 | Solyc01g095460.3 | Solyc01g095630.3 | Solyc01g096320.3 | Solyc01g096810.3 | Solyc01g097330.3 | Solyc01g104740.3 | Solyc01g105810.3 | Solyc01g108130.3 | Solyc01g108240.3 | Solyc01g110310.3 | Solyc01g110480.3 | Solyc01g111580.3 | Solyc02g032950.3 | Solyc02g063520.3 | Solyc02g072000.3 | Solyc02g077370.1 | …
GO:0080090	regulation of primary metabolic process	1045	256	203.93	42	0.92514	1.2e-05	103	153	Solyc01g007810.1 | Solyc01g059870.3 | Solyc01g087690.2 | Solyc01g089850.3 | Solyc01g102740.3 | Solyc01g104650.3 | Solyc01g109550.2 | Solyc01g109700.3 | Solyc01g112190.3 | Solyc02g021430.1 | Solyc02g064960.3 | Solyc02g067230.3 | Solyc02g069855.1 | Solyc02g069860.3 | Solyc02g071260.3 | Solyc02g077950.2 | Solyc02g084240.3 | Solyc02g084420.3 | Solyc02g084590.3 | Solyc02g092070.3 | Solyc02g093130.2 | …	Solyc01g057460.3 | Solyc01g067740.3 | Solyc01g073910.3 | Solyc01g079260.3 | Solyc01g090300.3 | Solyc01g095100.3 | Solyc01g095460.3 | Solyc01g095630.3 | Solyc01g096320.3 | Solyc01g096810.3 | Solyc01g097330.3 | Solyc01g104740.3 | Solyc01g105810.3 | Solyc01g108130.3 | Solyc01g108240.3 | Solyc01g110310.3 | Solyc01g110480.3 | Solyc01g111580.3 | Solyc02g032950.3 | Solyc02g063520.3 | Solyc02g064980.1 | …
GO:0042221	response to chemical	521	140	101.67	43	0.95544	1.5e-05	63	77	Solyc01g006650.2 | Solyc01g091030.3 | Solyc01g110560.3 | Solyc01g110590.3 | Solyc01g110605.1 | Solyc01g110670.3 | Solyc01g110730.3 | Solyc01g110920.3 | Solyc01g110940.3 | Solyc01g110970.3 | Solyc02g067030.3 | Solyc02g068080.3 | Solyc02g091840.3 | Solyc03g033590.1 | Solyc03g082510.1 | Solyc03g096760.1 | Solyc03g096770.1 | Solyc03g096780.1 | Solyc03g114450.3 | Solyc03g117630.1 | Solyc03g119690.2 | …	Solyc01g007110.3 | Solyc01g067740.3 | Solyc01g086960.3 | Solyc01g095140.3 | Solyc01g095150.3 | Solyc01g096810.3 | Solyc01g098390.3 | Solyc01g099680.3 | Solyc01g104740.3 | Solyc01g105070.3 | Solyc01g108910.3 | Solyc01g109920.2 | Solyc01g110843.1 | Solyc02g032850.3 | Solyc02g063010.3 | Solyc02g069310.3 | Solyc02g071990.3 | Solyc02g072520.3 | Solyc02g083850.3 | Solyc02g087070.3 | Solyc02g093050.3 | …
GO:0019219	regulation of nucleobase-containing compound metabolic process	866	226	169	28	0.95877	3.3e-07	94	132	Solyc01g007810.1 | Solyc01g059870.3 | Solyc01g087690.2 | Solyc01g102740.3 | Solyc01g104650.3 | Solyc01g109550.2 | Solyc01g109700.3 | Solyc01g112190.3 | Solyc02g021430.1 | Solyc02g064960.3 | Solyc02g067230.3 | Solyc02g069855.1 | Solyc02g069860.3 | Solyc02g071260.3 | Solyc02g077950.2 | Solyc02g084240.3 | Solyc02g084420.3 | Solyc02g084590.3 | Solyc02g092070.3 | Solyc02g093130.2 | Solyc02g093150.3 | …	Solyc01g057460.3 | Solyc01g073910.3 | Solyc01g079260.3 | Solyc01g090300.3 | Solyc01g095100.3 | Solyc01g095460.3 | Solyc01g095630.3 | Solyc01g096320.3 | Solyc01g096810.3 | Solyc01g097330.3 | Solyc01g104740.3 | Solyc01g105810.3 | Solyc01g108130.3 | Solyc01g108240.3 | Solyc01g110310.3 | Solyc01g110480.3 | Solyc01g111580.3 | Solyc02g032950.3 | Solyc02g063520.3 | Solyc02g072000.3 | Solyc02g077370.1 | …
GO:0016310	phosphorylation	889	264	173.49	2	0.97464	6e-15	95	169	Solyc01g007130.3 | Solyc01g057210.3 | Solyc01g059870.3 | Solyc01g089850.3 | Solyc01g098410.3 | Solyc01g098740.3 | Solyc01g105670.3 | Solyc02g021590.3 | Solyc02g062340.3 | Solyc02g067030.3 | Solyc02g071260.3 | Solyc02g072540.3 | Solyc02g081470.3 | Solyc02g083670.3 | Solyc02g084440.3 | Solyc02g091840.3 | Solyc02g091860.3 | Solyc03g006030.3 | Solyc03g064010.3 | Solyc03g080060.1 | Solyc03g095510.3 | …	Solyc00g007060.3 | Solyc01g008497.1 | Solyc01g008500.3 | Solyc01g010660.3 | Solyc01g067020.3 | Solyc01g081297.1 | Solyc01g088690.3 | Solyc01g094020.3 | Solyc01g097840.3 | Solyc01g102700.3 | Solyc01g103220.3 | Solyc01g103940.3 | Solyc01g106500.3 | Solyc01g108840.3 | Solyc01g112220.3 | Solyc02g014030.2 | Solyc02g021440.3 | Solyc02g031790.2 | Solyc02g062780.3 | Solyc02g064980.1 | Solyc02g071740.3 | …
GO:0043412	macromolecule modification	1503	371	293.31	22	0.98527	2.5e-08	137	234	Solyc01g007130.3 | Solyc01g059870.3 | Solyc01g066870.3 | Solyc01g067360.3 | Solyc01g068050.3 | Solyc01g089850.3 | Solyc01g098410.3 | Solyc01g098740.3 | Solyc01g105030.3 | Solyc01g105050.3 | Solyc01g105670.3 | Solyc01g105710.3 | Solyc02g021590.3 | Solyc02g067030.3 | Solyc02g071260.3 | Solyc02g072540.3 | Solyc02g081470.3 | Solyc02g083570.3 | Solyc02g087040.1 | Solyc02g091840.3 | Solyc02g091860.3 | …	Solyc00g007060.3 | Solyc01g005160.3 | Solyc01g007010.3 | Solyc01g007025.1 | Solyc01g007040.3 | Solyc01g008497.1 | Solyc01g008500.3 | Solyc01g010660.3 | Solyc01g067020.3 | Solyc01g068000.3 | Solyc01g081297.1 | Solyc01g086960.3 | Solyc01g087060.3 | Solyc01g087620.3 | Solyc01g087870.3 | Solyc01g088440.2 | Solyc01g088690.3 | Solyc01g094020.3 | Solyc01g096200.3 | Solyc01g097840.3 | Solyc01g100040.3 | …
GO:0050896	response to stimulus	1367	346	266.77	17	0.99339	4.4e-09	146	200	Solyc01g006650.2 | Solyc01g059870.3 | Solyc01g074040.2 | Solyc01g091030.3 | Solyc01g096360.3 | Solyc01g098190.3 | Solyc01g102850.2 | Solyc01g105030.3 | Solyc01g105050.3 | Solyc01g107180.3 | Solyc01g109550.2 | Solyc01g110560.3 | Solyc01g110590.3 | Solyc01g110605.1 | Solyc01g110670.3 | Solyc01g110730.3 | Solyc01g110920.3 | Solyc01g110940.3 | Solyc01g110970.3 | Solyc02g067030.3 | Solyc02g068080.3 | …	Solyc01g005430.3 | Solyc01g007110.3 | Solyc01g014840.3 | Solyc01g067740.3 | Solyc01g079200.3 | Solyc01g086960.3 | Solyc01g088560.3 | Solyc01g090430.3 | Solyc01g095140.3 | Solyc01g095150.3 | Solyc01g096030.3 | Solyc01g096810.3 | Solyc01g097840.3 | Solyc01g098390.3 | Solyc01g099520.3 | Solyc01g099680.3 | Solyc01g102840.3 | Solyc01g102880.2 | Solyc01g103490.3 | Solyc01g103940.3 | Solyc01g104740.3 | …
GO:0019438	aromatic compound biosynthetic process	1126	270	219.74	44	0.99701	3.8e-05	118	152	Solyc01g007810.1 | Solyc01g059870.3 | Solyc01g067890.3 | Solyc01g087690.2 | Solyc01g102740.3 | Solyc01g103720.3 | Solyc01g104650.3 | Solyc01g109550.2 | Solyc01g109700.3 | Solyc01g110520.3 | Solyc01g112190.3 | Solyc02g021430.1 | Solyc02g064960.3 | Solyc02g067230.3 | Solyc02g069855.1 | Solyc02g069860.3 | Solyc02g071260.3 | Solyc02g072260.3 | Solyc02g077950.2 | Solyc02g080540.1 | Solyc02g084240.3 | …	Solyc01g008560.3 | Solyc01g057460.3 | Solyc01g073910.3 | Solyc01g079260.3 | Solyc01g088480.3 | Solyc01g090300.3 | Solyc01g095100.3 | Solyc01g095460.3 | Solyc01g095630.3 | Solyc01g096320.3 | Solyc01g096810.3 | Solyc01g097330.3 | Solyc01g104740.3 | Solyc01g105810.3 | Solyc01g106390.3 | Solyc01g108130.3 | Solyc01g108240.3 | Solyc01g110310.3 | Solyc01g110480.3 | Solyc01g111580.3 | Solyc02g032850.3 | …
GO:0097659	nucleic acid-templated transcription	896	227	174.85	36	0.99765	3.5e-06	94	133	Solyc01g007810.1 | Solyc01g059870.3 | Solyc01g087690.2 | Solyc01g102740.3 | Solyc01g104650.3 | Solyc01g109550.2 | Solyc01g109700.3 | Solyc01g112190.3 | Solyc02g021430.1 | Solyc02g064960.3 | Solyc02g067230.3 | Solyc02g069855.1 | Solyc02g069860.3 | Solyc02g071260.3 | Solyc02g072260.3 | Solyc02g077950.2 | Solyc02g084240.3 | Solyc02g084420.3 | Solyc02g084590.3 | Solyc02g092070.3 | Solyc02g093130.2 | …	Solyc01g057460.3 | Solyc01g073910.3 | Solyc01g079260.3 | Solyc01g090300.3 | Solyc01g095100.3 | Solyc01g095460.3 | Solyc01g095630.3 | Solyc01g096320.3 | Solyc01g096810.3 | Solyc01g097330.3 | Solyc01g104740.3 | Solyc01g105810.3 | Solyc01g108130.3 | Solyc01g108240.3 | Solyc01g110310.3 | Solyc01g110480.3 | Solyc01g111580.3 | Solyc02g032950.3 | Solyc02g063010.3 | Solyc02g063520.3 | Solyc02g071990.3 | …
GO:1901362	organic cyclic compound biosynthetic process	1194	280	233.01	49	0.99788	0.00015	124	156	Solyc01g007810.1 | Solyc01g059870.3 | Solyc01g067890.3 | Solyc01g087560.3 | Solyc01g087690.2 | Solyc01g100490.3 | Solyc01g102740.3 | Solyc01g103720.3 | Solyc01g104650.3 | Solyc01g109550.2 | Solyc01g109700.3 | Solyc01g110520.3 | Solyc01g112190.3 | Solyc02g021430.1 | Solyc02g064960.3 | Solyc02g067230.3 | Solyc02g069855.1 | Solyc02g069860.3 | Solyc02g071260.3 | Solyc02g072260.3 | Solyc02g077950.2 | …	Solyc01g008560.3 | Solyc01g057460.3 | Solyc01g073910.3 | Solyc01g079260.3 | Solyc01g088480.3 | Solyc01g090300.3 | Solyc01g095100.3 | Solyc01g095460.3 | Solyc01g095630.3 | Solyc01g096320.3 | Solyc01g096810.3 | Solyc01g097330.3 | Solyc01g104740.3 | Solyc01g105560.3 | Solyc01g105810.3 | Solyc01g106390.3 | Solyc01g108130.3 | Solyc01g108240.3 | Solyc01g110310.3 | Solyc01g110480.3 | Solyc01g111580.3 | …
GO:0032774	RNA biosynthetic process	899	227	175.44	38	0.99844	4.5e-06	94	133	Solyc01g007810.1 | Solyc01g059870.3 | Solyc01g087690.2 | Solyc01g102740.3 | Solyc01g104650.3 | Solyc01g109550.2 | Solyc01g109700.3 | Solyc01g112190.3 | Solyc02g021430.1 | Solyc02g064960.3 | Solyc02g067230.3 | Solyc02g069855.1 | Solyc02g069860.3 | Solyc02g071260.3 | Solyc02g072260.3 | Solyc02g077950.2 | Solyc02g084240.3 | Solyc02g084420.3 | Solyc02g084590.3 | Solyc02g092070.3 | Solyc02g093130.2 | …	Solyc01g057460.3 | Solyc01g073910.3 | Solyc01g079260.3 | Solyc01g090300.3 | Solyc01g095100.3 | Solyc01g095460.3 | Solyc01g095630.3 | Solyc01g096320.3 | Solyc01g096810.3 | Solyc01g097330.3 | Solyc01g104740.3 | Solyc01g105810.3 | Solyc01g108130.3 | Solyc01g108240.3 | Solyc01g110310.3 | Solyc01g110480.3 | Solyc01g111580.3 | Solyc02g032950.3 | Solyc02g063010.3 | Solyc02g063520.3 | Solyc02g071990.3 | …
GO:0006351	transcription, DNA-templated	895	226	174.66	39	0.99911	4.7e-06	94	132	Solyc01g007810.1 | Solyc01g059870.3 | Solyc01g087690.2 | Solyc01g102740.3 | Solyc01g104650.3 | Solyc01g109550.2 | Solyc01g109700.3 | Solyc01g112190.3 | Solyc02g021430.1 | Solyc02g064960.3 | Solyc02g067230.3 | Solyc02g069855.1 | Solyc02g069860.3 | Solyc02g071260.3 | Solyc02g072260.3 | Solyc02g077950.2 | Solyc02g084240.3 | Solyc02g084420.3 | Solyc02g084590.3 | Solyc02g092070.3 | Solyc02g093130.2 | …	Solyc01g057460.3 | Solyc01g073910.3 | Solyc01g079260.3 | Solyc01g090300.3 | Solyc01g095100.3 | Solyc01g095460.3 | Solyc01g095630.3 | Solyc01g096320.3 | Solyc01g096810.3 | Solyc01g097330.3 | Solyc01g105810.3 | Solyc01g108130.3 | Solyc01g108240.3 | Solyc01g110310.3 | Solyc01g110480.3 | Solyc01g111580.3 | Solyc02g032950.3 | Solyc02g063010.3 | Solyc02g063520.3 | Solyc02g071990.3 | Solyc02g072000.3 | …
GO:0051716	cellular response to stimulus	821	193	160.22	79	0.99915	0.00161	69	124	Solyc01g006650.2 | Solyc01g059870.3 | Solyc01g096360.3 | Solyc01g102850.2 | Solyc01g109550.2 | Solyc02g067030.3 | Solyc02g071260.3 | Solyc02g072540.3 | Solyc02g083670.3 | Solyc02g091840.3 | Solyc02g092110.3 | Solyc03g095510.3 | Solyc03g096760.1 | Solyc03g096770.1 | Solyc03g096780.1 | Solyc03g114450.3 | Solyc03g117630.1 | Solyc04g007690.3 | Solyc04g014690.3 | Solyc05g006420.3 | Solyc05g008060.3 | …	Solyc01g007110.3 | Solyc01g014840.3 | Solyc01g067740.3 | Solyc01g088560.3 | Solyc01g096810.3 | Solyc01g097840.3 | Solyc01g098390.3 | Solyc01g099520.3 | Solyc01g102840.3 | Solyc01g102880.2 | Solyc01g103490.3 | Solyc01g103940.3 | Solyc01g105070.3 | Solyc01g105810.3 | Solyc01g109110.3 | Solyc01g112350.3 | Solyc02g021440.3 | Solyc02g032850.3 | Solyc02g063010.3 | Solyc02g064980.1 | Solyc02g068680.1 | …
GO:0018130	heterocycle biosynthetic process	1119	260	218.37	61	0.9999	0.0005	117	143	Solyc01g007810.1 | Solyc01g059870.3 | Solyc01g067890.3 | Solyc01g087690.2 | Solyc01g100490.3 | Solyc01g102740.3 | Solyc01g103720.3 | Solyc01g104650.3 | Solyc01g109550.2 | Solyc01g109700.3 | Solyc01g110520.3 | Solyc01g112190.3 | Solyc02g021430.1 | Solyc02g064960.3 | Solyc02g067230.3 | Solyc02g069855.1 | Solyc02g069860.3 | Solyc02g071260.3 | Solyc02g072260.3 | Solyc02g077950.2 | Solyc02g080540.1 | …	Solyc01g008560.3 | Solyc01g057460.3 | Solyc01g073910.3 | Solyc01g079260.3 | Solyc01g088480.3 | Solyc01g090300.3 | Solyc01g095100.3 | Solyc01g095460.3 | Solyc01g095630.3 | Solyc01g096320.3 | Solyc01g096810.3 | Solyc01g097330.3 | Solyc01g104740.3 | Solyc01g105560.3 | Solyc01g105810.3 | Solyc01g106390.3 | Solyc01g108130.3 | Solyc01g108240.3 | Solyc01g110310.3 | Solyc01g110480.3 | Solyc01g111580.3 | …
GO:0034654	nucleobase-containing compound biosynthetic process	1015	239	198.08	59	0.99994	0.00038	101	138	Solyc01g007810.1 | Solyc01g059870.3 | Solyc01g087690.2 | Solyc01g102740.3 | Solyc01g104650.3 | Solyc01g109550.2 | Solyc01g109700.3 | Solyc01g110520.3 | Solyc01g112190.3 | Solyc02g021430.1 | Solyc02g064960.3 | Solyc02g067230.3 | Solyc02g069855.1 | Solyc02g069860.3 | Solyc02g071260.3 | Solyc02g072260.3 | Solyc02g077950.2 | Solyc02g080540.1 | Solyc02g084240.3 | Solyc02g084420.3 | Solyc02g084590.3 | …	Solyc01g008560.3 | Solyc01g057460.3 | Solyc01g073910.3 | Solyc01g079260.3 | Solyc01g088480.3 | Solyc01g090300.3 | Solyc01g095100.3 | Solyc01g095460.3 | Solyc01g095630.3 | Solyc01g096320.3 | Solyc01g096810.3 | Solyc01g097330.3 | Solyc01g104740.3 | Solyc01g105810.3 | Solyc01g108130.3 | Solyc01g108240.3 | Solyc01g110310.3 | Solyc01g110480.3 | Solyc01g111580.3 | Solyc02g032950.3 | Solyc02g063010.3 | …
GO:0023052	signaling	476	145	92.89	15	1	2.6e-09	51	94	Solyc01g006650.2 | Solyc01g059870.3 | Solyc01g096360.3 | Solyc01g102850.2 | Solyc02g067030.3 | Solyc02g071260.3 | Solyc02g072540.3 | Solyc02g083670.3 | Solyc02g091840.3 | Solyc02g092110.3 | Solyc03g095510.3 | Solyc04g007690.3 | Solyc05g006420.3 | Solyc05g008060.3 | Solyc05g009170.2 | Solyc05g047460.3 | Solyc05g049970.3 | Solyc05g052270.2 | Solyc05g053210.3 | Solyc06g007440.3 | Solyc06g053830.3 | …	Solyc01g014840.3 | Solyc01g088560.3 | Solyc01g096810.3 | Solyc01g097840.3 | Solyc01g098390.3 | Solyc01g099520.3 | Solyc01g102840.3 | Solyc01g102880.2 | Solyc01g103940.3 | Solyc01g105810.3 | Solyc01g109110.3 | Solyc01g112350.3 | Solyc02g021440.3 | Solyc02g032850.3 | Solyc02g063010.3 | Solyc02g064980.1 | Solyc02g068680.1 | Solyc02g069310.3 | Solyc02g071220.3 | Solyc02g071990.3 | Solyc02g082550.3 | …
GO:0008037	cell recognition	37	17	7.22	52	1	0.00023	4	13	Solyc04g008370.2 | Solyc04g077370.2 | Solyc07g063735.1 | Solyc09g009150.1	Solyc02g079570.3 | Solyc02g079590.3 | Solyc02g079710.3 | Solyc03g078360.2 | Solyc04g077270.3 | Solyc07g053220.2 | Solyc07g055690.2 | Solyc09g011330.2 | Solyc09g075910.1 | Solyc09g075920.1 | Solyc10g006690.3 | Solyc11g005630.1 | Solyc11g013880.1
GO:0009314	response to radiation	148	46	28.88	60	1	0.00048	36	10	Solyc01g059870.3 | Solyc01g105030.3 | Solyc01g105050.3 | Solyc02g071260.3 | Solyc02g084420.3 | Solyc02g086350.3 | Solyc02g087400.1 | Solyc03g005760.1 | Solyc03g005770.2 | Solyc03g006880.3 | Solyc03g114450.3 | Solyc05g007480.1 | Solyc05g056050.3 | Solyc05g056070.3 | Solyc06g062480.3 | Solyc06g069730.3 | Solyc06g069880.1 | Solyc06g073180.3 | Solyc07g005510.3 | Solyc07g043130.3 | Solyc07g063600.3 | …	Solyc01g067740.3 | Solyc01g079200.3 | Solyc01g096030.3 | Solyc02g032850.3 | Solyc05g050930.2 | Solyc07g062310.3 | Solyc08g065870.3 | Solyc10g008880.3 | Solyc10g085030.1 | Solyc11g068390.1
GO:0009875	pollen-pistil interaction	40	17	7.81	65	1	0.00072	4	13	Solyc04g008370.2 | Solyc04g077370.2 | Solyc07g063735.1 | Solyc09g009150.1	Solyc02g079570.3 | Solyc02g079590.3 | Solyc02g079710.3 | Solyc03g078360.2 | Solyc04g077270.3 | Solyc07g053220.2 | Solyc07g055690.2 | Solyc09g011330.2 | Solyc09g075910.1 | Solyc09g075920.1 | Solyc10g006690.3 | Solyc11g005630.1 | Solyc11g013880.1
GO:0009697	salicylic acid biosynthetic process	4	4	0.78	75	1	0.00145	0	4		Solyc02g032850.3 | Solyc02g079040.3 | Solyc03g119250.3 | Solyc12g036390.2
GO:0010337	regulation of salicylic acid metabolic process	4	4	0.78	76	1	0.00145	0	4		Solyc02g032850.3 | Solyc02g079040.3 | Solyc03g119250.3 | Solyc12g036390.2
GO:0046189	phenol-containing compound biosynthetic process	4	4	0.78	77	1	0.00145	0	4		Solyc02g032850.3 | Solyc02g079040.3 | Solyc03g119250.3 | Solyc12g036390.2
GO:1902644	tertiary alcohol metabolic process	7	5	1.37	89	1	0.00415	1	4	Solyc04g078900.3	Solyc04g005480.1 | Solyc07g056570.1 | Solyc08g005610.3 | Solyc08g016720.1
GO:0043288	apocarotenoid metabolic process	7	5	1.37	90	1	0.00415	1	4	Solyc04g078900.3	Solyc04g005480.1 | Solyc07g056570.1 | Solyc08g005610.3 | Solyc08g016720.1
GO:0009415	response to water	59	20	11.51	97	1	0.00642	6	14	Solyc03g119690.2 | Solyc04g078900.3 | Solyc07g053180.3 | Solyc08g074560.3 | Solyc11g069430.2 | Solyc12g056220.2	Solyc01g086960.3 | Solyc01g095140.3 | Solyc01g095150.3 | Solyc01g099680.3 | Solyc01g104740.3 | Solyc01g109920.2 | Solyc03g097270.3 | Solyc04g073990.3 | Solyc06g005170.3 | Solyc07g056570.1 | Solyc08g005610.3 | Solyc08g016720.1 | Solyc09g075820.3 | Solyc09g075830.3

## Sheet: MF
GO.ID	Term	Annotated	Significant	Expected	Rank in Fisher.classic	Fisher.elim	Fisher.classic	GO_upregulated_genes_count	GO_downregulated_genes_count	GO_upregulated_genes	GO_downregulated_genes
GO:0003700	DNA binding transcription factor activity	428	163	82.61	2	1.7e-20	1.7e-20	54	109	Solyc01g006650.2 | Solyc01g087690.2 | Solyc01g104650.3 | Solyc01g109700.3 | Solyc02g064960.3 | Solyc02g067230.3 | Solyc02g069855.1 | Solyc02g069860.3 | Solyc02g093130.2 | Solyc02g093150.3 | Solyc03g082550.3 | Solyc03g115940.3 | Solyc04g005800.3 | Solyc04g007000.1 | Solyc04g007170.3 | Solyc04g011670.3 | Solyc04g014530.1 | Solyc04g049800.3 | Solyc04g072460.3 | Solyc04g080740.1 | Solyc05g006650.3 | …	Solyc01g005060.3 | Solyc01g073910.3 | Solyc01g079260.3 | Solyc01g090300.3 | Solyc01g095100.3 | Solyc01g095460.3 | Solyc01g095630.3 | Solyc01g096320.3 | Solyc01g096810.3 | Solyc01g097330.3 | Solyc01g105810.3 | Solyc01g108240.3 | Solyc01g110310.3 | Solyc01g110480.3 | Solyc01g111580.3 | Solyc02g032950.3 | Solyc02g063010.3 | Solyc02g063520.3 | Solyc02g071990.3 | Solyc02g072000.3 | Solyc02g077370.1 | …
GO:0004672	protein kinase activity	727	243	140.32	1	5.9e-12	4.3e-21	85	158	Solyc01g007130.3 | Solyc01g010480.3 | Solyc01g057210.3 | Solyc01g059870.3 | Solyc01g098410.3 | Solyc01g098740.3 | Solyc01g105670.3 | Solyc02g021590.3 | Solyc02g067030.3 | Solyc02g071260.3 | Solyc02g072540.3 | Solyc02g081470.3 | Solyc02g083670.3 | Solyc02g091840.3 | Solyc02g091860.3 | Solyc03g006030.3 | Solyc03g064010.3 | Solyc03g080060.1 | Solyc03g095510.3 | Solyc03g112050.3 | Solyc03g112580.3 | …	Solyc00g007060.3 | Solyc01g008497.1 | Solyc01g008500.3 | Solyc01g010660.3 | Solyc01g067020.3 | Solyc01g081297.1 | Solyc01g088690.3 | Solyc01g094020.3 | Solyc01g097840.3 | Solyc01g102700.3 | Solyc01g103940.3 | Solyc01g106500.3 | Solyc01g108840.3 | Solyc01g112220.3 | Solyc02g014030.2 | Solyc02g021440.3 | Solyc02g031790.2 | Solyc02g062780.3 | Solyc02g064980.1 | Solyc02g071740.3 | Solyc02g071820.3 | …
GO:0043565	sequence-specific DNA binding	337	112	65.04	7	5.1e-10	5.1e-10	35	77	Solyc01g109700.3 | Solyc02g067230.3 | Solyc02g067340.3 | Solyc02g084590.3 | Solyc02g088190.3 | Solyc03g082550.3 | Solyc03g112390.3 | Solyc03g115940.3 | Solyc04g005800.3 | Solyc04g011670.3 | Solyc04g072460.3 | Solyc04g080740.1 | Solyc05g006650.3 | Solyc05g007420.1 | Solyc05g007880.3 | Solyc05g009170.2 | Solyc05g054400.3 | Solyc06g005330.3 | Solyc06g069760.3 | Solyc06g070900.3 | Solyc07g062680.2 | …	Solyc01g073910.3 | Solyc01g079260.3 | Solyc01g095100.3 | Solyc01g095630.3 | Solyc01g096320.3 | Solyc01g104740.3 | Solyc01g105810.3 | Solyc01g110310.3 | Solyc02g032950.3 | Solyc02g063520.3 | Solyc02g072000.3 | Solyc02g076640.1 | Solyc02g079040.3 | Solyc02g079280.3 | Solyc02g080890.3 | Solyc02g084630.3 | Solyc02g087960.3 | Solyc02g090820.3 | Solyc02g093050.3 | Solyc03g005570.3 | Solyc03g006000.3 | …
GO:0004674	protein serine/threonine kinase activity	299	100	57.71	9	3e-09	3e-09	37	63	Solyc01g007130.3 | Solyc01g098740.3 | Solyc02g067030.3 | Solyc02g072540.3 | Solyc02g091860.3 | Solyc03g080060.1 | Solyc03g095510.3 | Solyc03g112580.3 | Solyc04g014690.3 | Solyc04g015460.3 | Solyc04g064940.3 | Solyc04g077370.2 | Solyc04g078700.3 | Solyc04g079690.3 | Solyc05g023760.3 | Solyc05g049970.3 | Solyc05g052270.2 | Solyc07g007020.3 | Solyc07g007980.3 | Solyc07g018140.3 | Solyc07g053180.3 | …	Solyc01g010660.3 | Solyc01g088690.3 | Solyc01g094020.3 | Solyc01g097840.3 | Solyc01g103940.3 | Solyc02g064980.1 | Solyc02g071740.3 | Solyc02g078530.3 | Solyc02g079570.3 | Solyc02g079590.3 | Solyc02g079710.3 | Solyc02g082550.3 | Solyc02g083850.3 | Solyc02g089290.3 | Solyc02g090110.3 | Solyc02g090430.3 | Solyc02g090970.1 | Solyc03g033540.3 | Solyc03g059490.1 | Solyc03g115610.3 | Solyc03g117640.1 | …
GO:0016168	chlorophyll binding	24	16	4.63	13	5.3e-07	5.3e-07	16	0	Solyc01g105030.3 | Solyc01g105050.3 | Solyc03g005760.1 | Solyc03g005770.2 | Solyc03g115900.3 | Solyc05g056050.3 | Solyc05g056070.3 | Solyc06g063360.3 | Solyc06g069730.3 | Solyc07g063600.3 | Solyc09g014520.3 | Solyc10g006230.3 | Solyc10g007690.3 | Solyc12g006140.2 | Solyc12g011280.2 | Solyc12g011450.2
GO:0005509	calcium ion binding	171	55	33	14	3.8e-05	3.8e-05	11	44	Solyc01g087040.2 | Solyc02g079950.3 | Solyc04g009420.3 | Solyc04g064670.3 | Solyc05g050750.1 | Solyc06g065380.3 | Solyc07g007020.3 | Solyc07g044860.3 | Solyc08g066800.3 | Solyc10g079755.1 | Solyc12g094720.2	Solyc01g058720.3 | Solyc01g091465.1 | Solyc02g063350.1 | Solyc02g079170.3 | Solyc02g079520.2 | Solyc02g079720.1 | Solyc02g081970.3 | Solyc02g083850.3 | Solyc02g088090.1 | Solyc02g091500.1 | Solyc02g094000.1 | Solyc03g005040.1 | Solyc03g033540.3 | Solyc03g098050.3 | Solyc03g115930.2 | Solyc03g117980.3 | Solyc03g118040.3 | Solyc03g118090.3 | Solyc03g118810.1 | Solyc04g018110.1 | Solyc04g048900.3 | …
GO:0044212	transcription regulatory region DNA binding	109	38	21.04	15	8.9e-05	8.9e-05	11	27	Solyc02g067340.3 | Solyc02g088190.3 | Solyc03g112390.3 | Solyc04g080740.1 | Solyc05g009170.2 | Solyc06g071230.3 | Solyc08g007170.1 | Solyc09g008250.3 | Solyc10g008160.3 | Solyc10g077110.1 | Solyc10g086250.2	Solyc01g095630.3 | Solyc01g105810.3 | Solyc02g072000.3 | Solyc02g079280.3 | Solyc02g084630.3 | Solyc02g087960.3 | Solyc02g090400.3 | Solyc02g090820.3 | Solyc02g093050.3 | Solyc03g005570.3 | Solyc03g006000.3 | Solyc03g007380.2 | Solyc03g093890.3 | Solyc03g118425.1 | Solyc04g064550.1 | Solyc05g009840.3 | Solyc06g009640.2 | Solyc06g035700.1 | Solyc07g053230.3 | Solyc08g008280.3 | Solyc08g080540.3 | …
GO:0020037	heme binding	208	62	40.15	18	0.00016	0.00016	32	30	Solyc01g108630.3 | Solyc02g065190.3 | Solyc02g084930.3 | Solyc03g111935.1 | Solyc03g111973.1 | Solyc03g112010.3 | Solyc04g051247.1 | Solyc04g063245.1 | Solyc04g078900.3 | Solyc04g079680.3 | Solyc05g055400.3 | Solyc06g082420.3 | Solyc07g008240.3 | Solyc07g055560.3 | Solyc07g061790.3 | Solyc08g076257.1 | Solyc08g079280.3 | Solyc08g081220.1 | Solyc09g059240.3 | Solyc09g066150.1 | Solyc09g092670.3 | …	Solyc01g103220.3 | Solyc01g105070.3 | Solyc02g087070.3 | Solyc02g087190.1 | Solyc02g092250.3 | Solyc02g092860.3 | Solyc03g082600.3 | Solyc03g111280.2 | Solyc03g111300.1 | Solyc03g122360.3 | Solyc04g071900.3 | Solyc04g078290.3 | Solyc04g079730.1 | Solyc05g011970.3 | Solyc06g065720.1 | Solyc06g076160.3 | Solyc06g076170.3 | Solyc07g006890.1 | Solyc07g014670.3 | Solyc08g005610.3 | Solyc09g061230.3 | …
GO:0004722	protein serine/threonine phosphatase activity	67	26	12.93	19	0.00016	0.00016	6	20	Solyc01g066870.3 | Solyc03g082970.3 | Solyc06g065920.3 | Solyc09g007080.3 | Solyc10g008490.3 | Solyc12g096020.2	Solyc01g068000.3 | Solyc01g100040.3 | Solyc01g105280.3 | Solyc01g107300.3 | Solyc02g083420.3 | Solyc02g092750.3 | Solyc03g007230.3 | Solyc03g096670.3 | Solyc03g097990.3 | Solyc04g079120.3 | Solyc05g052980.3 | Solyc06g076100.3 | Solyc06g082080.3 | Solyc07g007220.3 | Solyc07g040990.3 | Solyc07g053760.3 | Solyc07g066260.3 | Solyc09g010780.3 | Solyc10g005640.3 | Solyc10g049630.2
GO:0005506	iron ion binding	179	54	34.55	20	0.00029	0.00029	34	20	Solyc01g010860.3 | Solyc01g097910.2 | Solyc02g065190.3 | Solyc02g070050.3 | Solyc02g084930.3 | Solyc03g065250.3 | Solyc03g111935.1 | Solyc03g111973.1 | Solyc03g112010.3 | Solyc03g117800.3 | Solyc04g051247.1 | Solyc04g063245.1 | Solyc04g078900.3 | Solyc04g079680.3 | Solyc05g055400.3 | Solyc06g060310.3 | Solyc07g055560.3 | Solyc08g044260.3 | Solyc08g076257.1 | Solyc08g079280.3 | Solyc08g081220.1 | …	Solyc02g064750.3 | Solyc02g067530.3 | Solyc02g092250.3 | Solyc02g092860.3 | Solyc03g007960.3 | Solyc03g111280.2 | Solyc03g111300.1 | Solyc03g122360.3 | Solyc04g078290.3 | Solyc04g079730.1 | Solyc05g007460.3 | Solyc05g011970.3 | Solyc06g076160.3 | Solyc06g076170.3 | Solyc07g006890.1 | Solyc07g014670.3 | Solyc08g005610.3 | Solyc10g078230.2 | Solyc11g072550.2 | Solyc12g042480.2
GO:0005516	calmodulin binding	40	17	7.72	21	0.00063	0.00063	2	15	Solyc03g113920.3 | Solyc09g066010.3	Solyc01g100240.3 | Solyc02g064680.3 | Solyc02g072520.3 | Solyc02g079040.3 | Solyc02g088590.3 | Solyc02g092450.3 | Solyc02g093050.3 | Solyc03g033540.3 | Solyc03g113940.3 | Solyc03g113970.3 | Solyc03g119250.3 | Solyc04g078550.3 | Solyc07g008320.3 | Solyc11g069220.2 | Solyc12g036390.2
GO:0000155	phosphorelay sensor kinase activity	17	9	3.28	26	0.00197	0.00197	8	1	Solyc01g010480.3 | Solyc01g059870.3 | Solyc02g071260.3 | Solyc02g083670.3 | Solyc07g056580.3 | Solyc09g089610.3 | Solyc10g044670.2 | Solyc11g006180.2	Solyc05g015610.3
GO:0008080	N-acetyltransferase activity	43	16	8.3	34	0.00463	0.00463	7	9	Solyc02g064690.3 | Solyc02g092490.3 | Solyc03g025710.3 | Solyc03g082860.3 | Solyc05g005900.3 | Solyc05g025890.2 | Solyc06g071820.3	Solyc02g092450.3 | Solyc03g111710.3 | Solyc06g082070.3 | Solyc08g068710.1 | Solyc08g068770.2 | Solyc08g068780.2 | Solyc08g068790.2 | Solyc09g082230.1 | Solyc09g082240.3
GO:0043531	ADP binding	102	31	19.69	35	0.00467	0.00467	7	24	Solyc01g087200.3 | Solyc01g102850.2 | Solyc04g009130.3 | Solyc05g054340.3 | Solyc07g066180.2 | Solyc08g007250.2 | Solyc09g007710.3	Solyc01g014840.3 | Solyc01g090430.3 | Solyc01g102840.3 | Solyc01g102880.2 | Solyc02g084890.2 | Solyc02g090380.3 | Solyc04g005550.2 | Solyc04g007070.3 | Solyc04g007320.2 | Solyc04g039990.3 | Solyc05g009630.3 | Solyc05g012900.3 | Solyc07g049700.1 | Solyc07g055380.2 | Solyc09g005290.1 | Solyc09g018220.2 | Solyc10g047320.2 | Solyc10g051050.2 | Solyc11g006520.2 | Solyc11g011060.2 | Solyc11g011080.2 | …
GO:0015211	purine nucleoside transmembrane transporter activity	13	7	2.51	37	0.00567	0.00567	6	1	Solyc02g071080.2 | Solyc02g071090.3 | Solyc03g005820.3 | Solyc07g005660.3 | Solyc12g057075.1 | Solyc12g057100.2	Solyc04g074880.3
GO:0004827	proline-tRNA ligase activity	3	3	0.58	39	0.00718	0.00718	1	2	Solyc01g096870.3	Solyc03g117330.3 | Solyc06g068320.3
GO:0004665	prephenate dehydrogenase (NADP+) activity	3	3	0.58	40	0.00718	0.00718	0	3		Solyc06g050630.3 | Solyc07g007590.1 | Solyc09g011870.2
GO:0008977	prephenate dehydrogenase (NAD+) activity	3	3	0.58	41	0.00718	0.00718	0	3		Solyc06g050630.3 | Solyc07g007590.1 | Solyc09g011870.2
GO:0016709	oxidoreductase activity, acting on paired donors, with incorporation or reduction of molecular oxygen, NAD(P)H as one donor, and incorporation of one atom of oxygen	57	19	11	44	0.00848	0.00848	14	5	Solyc02g065190.3 | Solyc03g111973.1 | Solyc04g078900.3 | Solyc04g079680.3 | Solyc05g055400.3 | Solyc06g008050.3 | Solyc08g068160.2 | Solyc08g079280.3 | Solyc09g059240.3 | Solyc09g092670.3 | Solyc10g077040.2 | Solyc10g085500.2 | Solyc11g006590.2 | Solyc11g007540.2	Solyc02g063546.1 | Solyc02g092250.3 | Solyc02g092860.3 | Solyc07g014670.3 | Solyc08g005610.3
GO:0015116	sulfate transmembrane transporter activity	8	5	1.54	45	0.00886	0.00886	4	1	Solyc04g072740.3 | Solyc04g072760.3 | Solyc05g054740.3 | Solyc09g065560.3	Solyc11g010500.1
GO:0005524	ATP binding	1400	303	270.22	49	0.00973	0.00973	102	201	Solyc01g006720.3 | Solyc01g007130.3 | Solyc01g079507.1 | Solyc01g096410.3 | Solyc01g096870.3 | Solyc01g098410.3 | Solyc01g098740.3 | Solyc01g105670.3 | Solyc01g110130.3 | Solyc02g021590.3 | Solyc02g067030.3 | Solyc02g072540.3 | Solyc02g081470.3 | Solyc02g083570.3 | Solyc02g091840.3 | Solyc02g091860.3 | Solyc02g092070.3 | Solyc03g006030.3 | Solyc03g007760.3 | Solyc03g019760.3 | Solyc03g064010.3 | …	Solyc00g007060.3 | Solyc01g008497.1 | Solyc01g008500.3 | Solyc01g010660.3 | Solyc01g067020.3 | Solyc01g081297.1 | Solyc01g088480.3 | Solyc01g088690.3 | Solyc01g090430.3 | Solyc01g094020.3 | Solyc01g096930.3 | Solyc01g097840.3 | Solyc01g102700.3 | Solyc01g103940.3 | Solyc01g104775.1 | Solyc01g105450.3 | Solyc01g106500.3 | Solyc01g108840.3 | Solyc01g112220.3 | Solyc02g014030.2 | Solyc02g021440.3 | …
GO:0016747	transferase activity, transferring acyl groups other than amino-acyl groups	203	58	39.18	22	0.01743	0.00082	37	21	Solyc01g094700.3 | Solyc01g095930.3 | Solyc02g064690.3 | Solyc02g079490.3 | Solyc02g085870.3 | Solyc02g092490.3 | Solyc03g025320.3 | Solyc03g025710.3 | Solyc03g031850.1 | Solyc03g046270.3 | Solyc03g082860.3 | Solyc04g012020.1 | Solyc05g005900.3 | Solyc05g013207.1 | Solyc05g025890.2 | Solyc05g052650.2 | Solyc05g052670.1 | Solyc05g052680.1 | Solyc06g071820.3 | Solyc07g005760.3 | Solyc07g006680.1 | …	Solyc01g066520.3 | Solyc01g095960.3 | Solyc01g098110.3 | Solyc02g092450.3 | Solyc02g093180.3 | Solyc03g111710.3 | Solyc03g114600.3 | Solyc04g078660.1 | Solyc06g065560.2 | Solyc06g066630.1 | Solyc06g082070.3 | Solyc07g007430.3 | Solyc07g041160.3 | Solyc07g045350.3 | Solyc08g068710.1 | Solyc08g068770.2 | Solyc08g068780.2 | Solyc08g068790.2 | Solyc09g061840.3 | Solyc09g082230.1 | Solyc09g082240.3
GO:0016705	oxidoreductase activity, acting on paired donors, with incorporation or reduction of molecular oxygen	178	52	34.36	23	0.01892	0.00085	32	20	Solyc01g006430.3 | Solyc02g065190.3 | Solyc02g084930.3 | Solyc03g006880.3 | Solyc03g111935.1 | Solyc03g111973.1 | Solyc03g112010.3 | Solyc03g116730.3 | Solyc04g040190.1 | Solyc04g051247.1 | Solyc04g063245.1 | Solyc04g078900.3 | Solyc04g079680.3 | Solyc05g055400.3 | Solyc06g008050.3 | Solyc07g055560.3 | Solyc08g068160.2 | Solyc08g076257.1 | Solyc08g079280.3 | Solyc08g081220.1 | Solyc09g059240.3 | …	Solyc01g079200.3 | Solyc02g063546.1 | Solyc02g064750.3 | Solyc02g067530.3 | Solyc02g092250.3 | Solyc02g092860.3 | Solyc03g111280.2 | Solyc03g111300.1 | Solyc03g122360.3 | Solyc04g040130.1 | Solyc04g078290.3 | Solyc04g079730.1 | Solyc05g011970.3 | Solyc06g076160.3 | Solyc06g076170.3 | Solyc07g006890.1 | Solyc07g014670.3 | Solyc08g005610.3 | Solyc10g078230.2 | Solyc12g042480.2
GO:0003677	DNA binding	996	254	192.24	12	0.04113	2.4e-07	103	151	Solyc01g006650.2 | Solyc01g079507.1 | Solyc01g095030.3 | Solyc01g102740.3 | Solyc01g109550.2 | Solyc01g109655.1 | Solyc01g109690.1 | Solyc01g109700.3 | Solyc01g110130.3 | Solyc01g112190.3 | Solyc02g021430.1 | Solyc02g064960.3 | Solyc02g067230.3 | Solyc02g067310.3 | Solyc02g067320.2 | Solyc02g067340.3 | Solyc02g069860.3 | Solyc02g077950.2 | Solyc02g084240.3 | Solyc02g084590.3 | Solyc02g088190.3 | …	Solyc01g008220.3 | Solyc01g057460.3 | Solyc01g073910.3 | Solyc01g079260.3 | Solyc01g086960.3 | Solyc01g090300.3 | Solyc01g095100.3 | Solyc01g095630.3 | Solyc01g096320.3 | Solyc01g096810.3 | Solyc01g104740.3 | Solyc01g105810.3 | Solyc01g108130.3 | Solyc01g108240.3 | Solyc01g110310.3 | Solyc02g032950.3 | Solyc02g062370.3 | Solyc02g063520.3 | Solyc02g072000.3 | Solyc02g076640.1 | Solyc02g077370.1 | …
GO:0008509	anion transmembrane transporter activity	88	27	16.98	38	0.04591	0.00693	13	14	Solyc02g065680.3 | Solyc02g068080.3 | Solyc03g120020.3 | Solyc04g072740.3 | Solyc04g072760.3 | Solyc05g054740.3 | Solyc08g007430.2 | Solyc08g077170.3 | Solyc08g079770.3 | Solyc09g065560.3 | Solyc10g079200.2 | Solyc11g012360.2 | Solyc11g065830.2	Solyc01g057770.3 | Solyc01g111980.3 | Solyc02g082510.1 | Solyc02g092440.3 | Solyc03g082660.3 | Solyc03g117350.1 | Solyc03g118090.3 | Solyc06g060110.3 | Solyc09g014610.3 | Solyc10g044470.2 | Solyc10g055740.2 | Solyc11g010500.1 | Solyc11g062130.2 | Solyc12g042950.2
GO:0004872	receptor activity	106	33	20.46	28	0.04671	0.00234	21	12	Solyc01g007130.3 | Solyc01g010480.3 | Solyc01g059870.3 | Solyc01g098740.3 | Solyc02g071260.3 | Solyc02g083670.3 | Solyc03g080060.1 | Solyc04g078700.3 | Solyc04g079690.3 | Solyc05g023760.3 | Solyc07g018140.3 | Solyc07g056270.3 | Solyc07g056580.3 | Solyc08g066420.1 | Solyc08g079460.3 | Solyc08g082180.3 | Solyc09g011070.2 | Solyc09g089610.3 | Solyc10g044670.2 | Solyc11g006040.2 | Solyc11g006180.2	Solyc02g077290.2 | Solyc02g089290.3 | Solyc04g071870.1 | Solyc05g015610.3 | Solyc05g053010.1 | Solyc06g063180.2 | Solyc06g063210.3 | Solyc07g052390.3 | Solyc09g005000.1 | Solyc11g072660.2 | Solyc12g005450.1 | Solyc12g096960.2
GO:0016491	oxidoreductase activity	930	208	179.5	43	0.04892	0.00796	100	108	Solyc01g006430.3 | Solyc01g010860.3 | Solyc01g097910.2 | Solyc01g102610.3 | Solyc01g103100.3 | Solyc01g108630.3 | Solyc02g032860.3 | Solyc02g065190.3 | Solyc02g065400.3 | Solyc02g070050.3 | Solyc02g079950.3 | Solyc02g080640.3 | Solyc02g083810.3 | Solyc02g084640.3 | Solyc02g084930.3 | Solyc02g093640.3 | Solyc03g006690.1 | Solyc03g006880.3 | Solyc03g065250.3 | Solyc03g071590.3 | Solyc03g095500.3 | …	Solyc01g067740.3 | Solyc01g079200.3 | Solyc01g087590.3 | Solyc01g088160.3 | Solyc01g094040.3 | Solyc01g096420.3 | Solyc01g096435.1 | Solyc01g103220.3 | Solyc01g105070.3 | Solyc01g106390.3 | Solyc01g109410.3 | Solyc02g022850.1 | Solyc02g062463.1 | Solyc02g063546.1 | Solyc02g064750.3 | Solyc02g065170.3 | Solyc02g067440.3 | Solyc02g067530.3 | Solyc02g069250.3 | Solyc02g078900.3 | Solyc02g079170.3 | …
GO:0022857	transmembrane transporter activity	611	141	117.93	46	0.05349	0.00944	72	69	Solyc01g008240.3 | Solyc01g094720.3 | Solyc01g098190.3 | Solyc01g100610.3 | Solyc01g100910.3 | Solyc01g100920.3 | Solyc01g104030.3 | Solyc02g065680.3 | Solyc02g068080.3 | Solyc02g071080.2 | Solyc02g071090.3 | Solyc02g080540.1 | Solyc02g081600.3 | Solyc02g081850.3 | Solyc02g086145.1 | Solyc02g087060.3 | Solyc02g088560.3 | Solyc02g091080.2 | Solyc03g005820.3 | Solyc03g045070.1 | Solyc03g093140.3 | …	Solyc01g057770.3 | Solyc01g086730.3 | Solyc01g091850.3 | Solyc01g103030.3 | Solyc01g104820.3 | Solyc01g111980.3 | Solyc02g064680.3 | Solyc02g072130.3 | Solyc02g077290.2 | Solyc02g078600.3 | Solyc02g079220.3 | Solyc02g082510.1 | Solyc02g089110.3 | Solyc02g090560.3 | Solyc02g092440.3 | Solyc02g092450.3 | Solyc03g026230.1 | Solyc03g082660.3 | Solyc03g093410.3 | Solyc03g097840.3 | Solyc03g098210.3 | …
GO:0016746	transferase activity, transferring acyl groups	234	62	45.16	32	0.05453	0.00404	39	23	Solyc01g094700.3 | Solyc01g095930.3 | Solyc02g064690.3 | Solyc02g079490.3 | Solyc02g085870.3 | Solyc02g092490.3 | Solyc03g025320.3 | Solyc03g025710.3 | Solyc03g031850.1 | Solyc03g046270.3 | Solyc03g082860.3 | Solyc03g111120.3 | Solyc04g012020.1 | Solyc05g005900.3 | Solyc05g013207.1 | Solyc05g025890.2 | Solyc05g052650.2 | Solyc05g052670.1 | Solyc05g052680.1 | Solyc06g071820.3 | Solyc07g005760.3 | …	Solyc01g066520.3 | Solyc01g095960.3 | Solyc01g098110.3 | Solyc02g092450.3 | Solyc02g093180.3 | Solyc03g111710.3 | Solyc03g114600.3 | Solyc04g078660.1 | Solyc04g079880.3 | Solyc06g065560.2 | Solyc06g066630.1 | Solyc06g082070.3 | Solyc07g007430.3 | Solyc07g041160.3 | Solyc07g045350.3 | Solyc07g056320.3 | Solyc08g068710.1 | Solyc08g068770.2 | Solyc08g068780.2 | Solyc08g068790.2 | Solyc09g061840.3 | …
GO:0004497	monooxygenase activity	97	31	18.72	27	0.06798	0.00198	22	9	Solyc02g065190.3 | Solyc02g084930.3 | Solyc03g111973.1 | Solyc04g040160.3 | Solyc04g078900.3 | Solyc04g079680.3 | Solyc05g055400.3 | Solyc06g008050.3 | Solyc06g060310.3 | Solyc08g068160.2 | Solyc08g079280.3 | Solyc08g081220.1 | Solyc09g059240.3 | Solyc09g092670.3 | Solyc10g077040.2 | Solyc10g078280.3 | Solyc10g080840.1 | Solyc10g085500.2 | Solyc11g006590.2 | Solyc11g007540.2 | Solyc11g012850.2 | …	Solyc02g063546.1 | Solyc02g092250.3 | Solyc02g092860.3 | Solyc03g111280.2 | Solyc03g111300.1 | Solyc04g079730.1 | Solyc05g011970.3 | Solyc07g014670.3 | Solyc08g005610.3
GO:0038023	signaling receptor activity	101	30	19.49	42	0.116	0.00763	21	9	Solyc01g007130.3 | Solyc01g010480.3 | Solyc01g059870.3 | Solyc01g098740.3 | Solyc02g071260.3 | Solyc02g083670.3 | Solyc03g080060.1 | Solyc04g078700.3 | Solyc04g079690.3 | Solyc05g023760.3 | Solyc07g018140.3 | Solyc07g056270.3 | Solyc07g056580.3 | Solyc08g066420.1 | Solyc08g079460.3 | Solyc08g082180.3 | Solyc09g011070.2 | Solyc09g089610.3 | Solyc10g044670.2 | Solyc11g006040.2 | Solyc11g006180.2	Solyc02g077290.2 | Solyc02g089290.3 | Solyc04g071870.1 | Solyc05g015610.3 | Solyc05g053010.1 | Solyc09g005000.1 | Solyc11g072660.2 | Solyc12g005450.1 | Solyc12g096960.2
GO:0015103	inorganic anion transmembrane transporter activity	31	12	5.98	47	0.13774	0.00948	8	4	Solyc02g068080.3 | Solyc03g120020.3 | Solyc04g072740.3 | Solyc04g072760.3 | Solyc05g054740.3 | Solyc08g007430.2 | Solyc08g077170.3 | Solyc09g065560.3	Solyc01g057770.3 | Solyc03g082660.3 | Solyc10g044470.2 | Solyc11g010500.1
GO:0016407	acetyltransferase activity	70	23	13.51	36	0.25149	0.0049	13	10	Solyc02g064690.3 | Solyc02g092490.3 | Solyc03g025710.3 | Solyc03g031850.1 | Solyc03g046270.3 | Solyc03g082860.3 | Solyc05g005900.3 | Solyc05g025890.2 | Solyc06g071820.3 | Solyc07g065340.1 | Solyc09g065030.3 | Solyc10g006040.1 | Solyc12g009150.2	Solyc01g066520.3 | Solyc02g092450.3 | Solyc03g111710.3 | Solyc06g082070.3 | Solyc08g068710.1 | Solyc08g068770.2 | Solyc08g068780.2 | Solyc08g068790.2 | Solyc09g082230.1 | Solyc09g082240.3
GO:0046906	tetrapyrrole binding	234	79	45.16	10	0.34323	8.9e-08	49	30	Solyc01g105030.3 | Solyc01g105050.3 | Solyc01g108630.3 | Solyc02g065190.3 | Solyc02g084930.3 | Solyc03g005760.1 | Solyc03g005770.2 | Solyc03g111935.1 | Solyc03g111973.1 | Solyc03g112010.3 | Solyc03g115900.3 | Solyc04g051247.1 | Solyc04g063245.1 | Solyc04g078900.3 | Solyc04g079680.3 | Solyc05g055400.3 | Solyc05g056050.3 | Solyc05g056070.3 | Solyc06g063360.3 | Solyc06g069730.3 | Solyc06g073290.1 | …	Solyc01g103220.3 | Solyc01g105070.3 | Solyc02g087070.3 | Solyc02g087190.1 | Solyc02g092250.3 | Solyc02g092860.3 | Solyc03g082600.3 | Solyc03g111280.2 | Solyc03g111300.1 | Solyc03g122360.3 | Solyc04g071900.3 | Solyc04g078290.3 | Solyc04g079730.1 | Solyc05g011970.3 | Solyc06g065720.1 | Solyc06g076160.3 | Solyc06g076170.3 | Solyc07g006890.1 | Solyc07g014670.3 | Solyc08g005610.3 | Solyc09g061230.3 | …
GO:0016410	N-acyltransferase activity	46	17	8.88	31	0.47297	0.00387	7	10	Solyc02g064690.3 | Solyc02g092490.3 | Solyc03g025710.3 | Solyc03g082860.3 | Solyc05g005900.3 | Solyc05g025890.2 | Solyc06g071820.3	Solyc02g092450.3 | Solyc03g111710.3 | Solyc03g114600.3 | Solyc06g082070.3 | Solyc08g068710.1 | Solyc08g068770.2 | Solyc08g068780.2 | Solyc08g068790.2 | Solyc09g082230.1 | Solyc09g082240.3
GO:0016740	transferase activity	2062	482	397.99	11	0.81279	1.3e-07	204	278	Solyc01g005240.3 | Solyc01g005340.3 | Solyc01g007130.3 | Solyc01g010480.3 | Solyc01g057210.3 | Solyc01g059870.3 | Solyc01g067890.3 | Solyc01g068050.3 | Solyc01g087560.3 | Solyc01g094700.3 | Solyc01g095930.3 | Solyc01g096410.3 | Solyc01g098410.3 | Solyc01g098740.3 | Solyc01g099020.3 | Solyc01g100490.3 | Solyc01g103720.3 | Solyc01g105360.3 | Solyc01g105670.3 | Solyc01g110520.3 | Solyc02g021590.3 | …	Solyc00g007060.3 | Solyc01g005160.3 | Solyc01g007010.3 | Solyc01g007025.1 | Solyc01g007040.3 | Solyc01g008497.1 | Solyc01g008500.3 | Solyc01g008560.3 | Solyc01g010660.3 | Solyc01g050040.3 | Solyc01g058260.3 | Solyc01g066520.3 | Solyc01g067020.3 | Solyc01g067930.3 | Solyc01g081297.1 | Solyc01g086640.2 | Solyc01g086680.3 | Solyc01g086960.3 | Solyc01g087060.3 | Solyc01g087870.3 | Solyc01g088480.3 | …
GO:0004721	phosphoprotein phosphatase activity	111	32	21.42	48	0.87311	0.00963	9	23	Solyc01g066870.3 | Solyc03g082970.3 | Solyc05g054700.3 | Solyc05g055740.3 | Solyc06g065920.3 | Solyc08g078270.3 | Solyc09g007080.3 | Solyc10g008490.3 | Solyc12g096020.2	Solyc01g068000.3 | Solyc01g100040.3 | Solyc01g105280.3 | Solyc01g107300.3 | Solyc02g083420.3 | Solyc02g092750.3 | Solyc03g007230.3 | Solyc03g096670.3 | Solyc03g097990.3 | Solyc04g079120.3 | Solyc05g013750.3 | Solyc05g052980.3 | Solyc06g053630.3 | Solyc06g076100.3 | Solyc06g082080.3 | Solyc07g007220.3 | Solyc07g040990.3 | Solyc07g049560.3 | Solyc07g053760.3 | Solyc07g066260.3 | Solyc09g010780.3 | …
GO:0016773	phosphotransferase activity, alcohol group as acceptor	825	257	159.23	3	0.87438	1.1e-17	91	166	Solyc01g007130.3 | Solyc01g010480.3 | Solyc01g057210.3 | Solyc01g059870.3 | Solyc01g096410.3 | Solyc01g098410.3 | Solyc01g098740.3 | Solyc01g105670.3 | Solyc02g021590.3 | Solyc02g067030.3 | Solyc02g071260.3 | Solyc02g072540.3 | Solyc02g081470.3 | Solyc02g083670.3 | Solyc02g091840.3 | Solyc02g091860.3 | Solyc03g005260.3 | Solyc03g006030.3 | Solyc03g064010.3 | Solyc03g080060.1 | Solyc03g095510.3 | …	Solyc00g007060.3 | Solyc01g008497.1 | Solyc01g008500.3 | Solyc01g008560.3 | Solyc01g010660.3 | Solyc01g067020.3 | Solyc01g081297.1 | Solyc01g088690.3 | Solyc01g094020.3 | Solyc01g097840.3 | Solyc01g102700.3 | Solyc01g103940.3 | Solyc01g106500.3 | Solyc01g108840.3 | Solyc01g112220.3 | Solyc02g014030.2 | Solyc02g021440.3 | Solyc02g031790.2 | Solyc02g062780.3 | Solyc02g064980.1 | Solyc02g071740.3 | …
GO:0016301	kinase activity	877	265	169.27	5	0.89356	2.6e-16	96	169	Solyc01g005240.3 | Solyc01g007130.3 | Solyc01g010480.3 | Solyc01g057210.3 | Solyc01g059870.3 | Solyc01g096410.3 | Solyc01g098410.3 | Solyc01g098740.3 | Solyc01g105670.3 | Solyc02g021590.3 | Solyc02g067030.3 | Solyc02g071260.3 | Solyc02g072540.3 | Solyc02g081470.3 | Solyc02g083670.3 | Solyc02g091840.3 | Solyc02g091860.3 | Solyc03g005260.3 | Solyc03g006030.3 | Solyc03g064010.3 | Solyc03g071720.3 | …	Solyc00g007060.3 | Solyc01g008497.1 | Solyc01g008500.3 | Solyc01g008560.3 | Solyc01g010660.3 | Solyc01g067020.3 | Solyc01g081297.1 | Solyc01g088480.3 | Solyc01g088690.3 | Solyc01g094020.3 | Solyc01g095990.3 | Solyc01g097840.3 | Solyc01g102700.3 | Solyc01g103940.3 | Solyc01g106500.3 | Solyc01g108840.3 | Solyc01g112220.3 | Solyc02g014030.2 | Solyc02g021440.3 | Solyc02g031790.2 | Solyc02g062780.3 | …
GO:0140110	transcription regulator activity	484	170	93.42	4	0.91311	3.2e-17	56	114	Solyc01g006650.2 | Solyc01g087690.2 | Solyc01g104650.3 | Solyc01g109700.3 | Solyc02g064960.3 | Solyc02g067230.3 | Solyc02g069855.1 | Solyc02g069860.3 | Solyc02g093130.2 | Solyc02g093150.3 | Solyc03g082550.3 | Solyc03g115940.3 | Solyc04g005800.3 | Solyc04g007000.1 | Solyc04g007170.3 | Solyc04g011670.3 | Solyc04g014530.1 | Solyc04g049800.3 | Solyc04g072460.3 | Solyc04g080740.1 | Solyc05g006650.3 | …	Solyc01g005060.3 | Solyc01g008220.3 | Solyc01g057460.3 | Solyc01g073910.3 | Solyc01g079260.3 | Solyc01g090300.3 | Solyc01g095100.3 | Solyc01g095460.3 | Solyc01g095630.3 | Solyc01g096320.3 | Solyc01g096810.3 | Solyc01g097330.3 | Solyc01g104740.3 | Solyc01g105810.3 | Solyc01g108240.3 | Solyc01g110310.3 | Solyc01g110480.3 | Solyc01g111580.3 | Solyc02g032950.3 | Solyc02g063010.3 | Solyc02g063520.3 | …
GO:0043167	ion binding	3115	650	601.23	33	0.92379	0.0042	243	407	Solyc01g006720.3 | Solyc01g007130.3 | Solyc01g010860.3 | Solyc01g065690.3 | Solyc01g067360.3 | Solyc01g079507.1 | Solyc01g087040.2 | Solyc01g087200.3 | Solyc01g096410.3 | Solyc01g096870.3 | Solyc01g097910.2 | Solyc01g098410.3 | Solyc01g098740.3 | Solyc01g099600.3 | Solyc01g102850.2 | Solyc01g105670.3 | Solyc01g110130.3 | Solyc01g110370.3 | Solyc01g110520.3 | Solyc02g021590.3 | Solyc02g065190.3 | …	Solyc00g007060.3 | Solyc01g008497.1 | Solyc01g008500.3 | Solyc01g010660.3 | Solyc01g010880.3 | Solyc01g014840.3 | Solyc01g058720.3 | Solyc01g066520.3 | Solyc01g067020.3 | Solyc01g067740.3 | Solyc01g068000.3 | Solyc01g079200.3 | Solyc01g079810.3 | Solyc01g081297.1 | Solyc01g086960.3 | Solyc01g088160.3 | Solyc01g088480.3 | Solyc01g088560.3 | Solyc01g088690.3 | Solyc01g090430.3 | Solyc01g091160.3 | …
GO:0140096	catalytic activity, acting on a protein	1527	380	294.73	8	0.98325	2.8e-09	126	254	Solyc01g007130.3 | Solyc01g010480.3 | Solyc01g057210.3 | Solyc01g059870.3 | Solyc01g066870.3 | Solyc01g087810.2 | Solyc01g087840.3 | Solyc01g087970.3 | Solyc01g098410.3 | Solyc01g098740.3 | Solyc01g105670.3 | Solyc01g105710.3 | Solyc02g021590.3 | Solyc02g067030.3 | Solyc02g071260.3 | Solyc02g071580.3 | Solyc02g072540.3 | Solyc02g081470.3 | Solyc02g083570.3 | Solyc02g083670.3 | Solyc02g085745.1 | …	Solyc00g007060.3 | Solyc01g005160.3 | Solyc01g007010.3 | Solyc01g007025.1 | Solyc01g007040.3 | Solyc01g008497.1 | Solyc01g008500.3 | Solyc01g010660.3 | Solyc01g050040.3 | Solyc01g058010.3 | Solyc01g058020.3 | Solyc01g067020.3 | Solyc01g068000.3 | Solyc01g079940.3 | Solyc01g079950.3 | Solyc01g080010.2 | Solyc01g081297.1 | Solyc01g086960.3 | Solyc01g087060.3 | Solyc01g087490.3 | Solyc01g088690.3 | …
GO:0016772	transferase activity, transferring phosphorus-containing groups	1006	271	194.17	6	0.99995	2.8e-10	99	172	Solyc01g005240.3 | Solyc01g007130.3 | Solyc01g010480.3 | Solyc01g057210.3 | Solyc01g059870.3 | Solyc01g096410.3 | Solyc01g098410.3 | Solyc01g098740.3 | Solyc01g105670.3 | Solyc02g021590.3 | Solyc02g067030.3 | Solyc02g071260.3 | Solyc02g072540.3 | Solyc02g081470.3 | Solyc02g083670.3 | Solyc02g091840.3 | Solyc02g091860.3 | Solyc03g005260.3 | Solyc03g006030.3 | Solyc03g064010.3 | Solyc03g071720.3 | …	Solyc00g007060.3 | Solyc01g008497.1 | Solyc01g008500.3 | Solyc01g008560.3 | Solyc01g010660.3 | Solyc01g058260.3 | Solyc01g067020.3 | Solyc01g081297.1 | Solyc01g088480.3 | Solyc01g088690.3 | Solyc01g094020.3 | Solyc01g095990.3 | Solyc01g097840.3 | Solyc01g102700.3 | Solyc01g103940.3 | Solyc01g106500.3 | Solyc01g108840.3 | Solyc01g112220.3 | Solyc02g014030.2 | Solyc02g021440.3 | Solyc02g031790.2 | …
GO:0001067	regulatory region nucleic acid binding	109	38	21.04	16	1	8.9e-05	11	27	Solyc02g067340.3 | Solyc02g088190.3 | Solyc03g112390.3 | Solyc04g080740.1 | Solyc05g009170.2 | Solyc06g071230.3 | Solyc08g007170.1 | Solyc09g008250.3 | Solyc10g008160.3 | Solyc10g077110.1 | Solyc10g086250.2	Solyc01g095630.3 | Solyc01g105810.3 | Solyc02g072000.3 | Solyc02g079280.3 | Solyc02g084630.3 | Solyc02g087960.3 | Solyc02g090400.3 | Solyc02g090820.3 | Solyc02g093050.3 | Solyc03g005570.3 | Solyc03g006000.3 | Solyc03g007380.2 | Solyc03g093890.3 | Solyc03g118425.1 | Solyc04g064550.1 | Solyc05g009840.3 | Solyc06g009640.2 | Solyc06g035700.1 | Solyc07g053230.3 | Solyc08g008280.3 | Solyc08g080540.3 | …
GO:0000975	regulatory region DNA binding	109	38	21.04	17	1	8.9e-05	11	27	Solyc02g067340.3 | Solyc02g088190.3 | Solyc03g112390.3 | Solyc04g080740.1 | Solyc05g009170.2 | Solyc06g071230.3 | Solyc08g007170.1 | Solyc09g008250.3 | Solyc10g008160.3 | Solyc10g077110.1 | Solyc10g086250.2	Solyc01g095630.3 | Solyc01g105810.3 | Solyc02g072000.3 | Solyc02g079280.3 | Solyc02g084630.3 | Solyc02g087960.3 | Solyc02g090400.3 | Solyc02g090820.3 | Solyc02g093050.3 | Solyc03g005570.3 | Solyc03g006000.3 | Solyc03g007380.2 | Solyc03g093890.3 | Solyc03g118425.1 | Solyc04g064550.1 | Solyc05g009840.3 | Solyc06g009640.2 | Solyc06g035700.1 | Solyc07g053230.3 | Solyc08g008280.3 | Solyc08g080540.3 | …
GO:0032559	adenyl ribonucleotide binding	1492	331	287.97	24	1	0.0014	109	222	Solyc01g006720.3 | Solyc01g007130.3 | Solyc01g079507.1 | Solyc01g087200.3 | Solyc01g096410.3 | Solyc01g096870.3 | Solyc01g098410.3 | Solyc01g098740.3 | Solyc01g102850.2 | Solyc01g105670.3 | Solyc01g110130.3 | Solyc02g021590.3 | Solyc02g067030.3 | Solyc02g072540.3 | Solyc02g081470.3 | Solyc02g083570.3 | Solyc02g091840.3 | Solyc02g091860.3 | Solyc02g092070.3 | Solyc03g006030.3 | Solyc03g007760.3 | …	Solyc00g007060.3 | Solyc01g008497.1 | Solyc01g008500.3 | Solyc01g010660.3 | Solyc01g014840.3 | Solyc01g067020.3 | Solyc01g081297.1 | Solyc01g088480.3 | Solyc01g088690.3 | Solyc01g090430.3 | Solyc01g094020.3 | Solyc01g096930.3 | Solyc01g097840.3 | Solyc01g102700.3 | Solyc01g102840.3 | Solyc01g102880.2 | Solyc01g103940.3 | Solyc01g104775.1 | Solyc01g105450.3 | Solyc01g106500.3 | Solyc01g108840.3 | …
GO:0030554	adenyl nucleotide binding	1496	331	288.74	25	1	0.00168	109	222	Solyc01g006720.3 | Solyc01g007130.3 | Solyc01g079507.1 | Solyc01g087200.3 | Solyc01g096410.3 | Solyc01g096870.3 | Solyc01g098410.3 | Solyc01g098740.3 | Solyc01g102850.2 | Solyc01g105670.3 | Solyc01g110130.3 | Solyc02g021590.3 | Solyc02g067030.3 | Solyc02g072540.3 | Solyc02g081470.3 | Solyc02g083570.3 | Solyc02g091840.3 | Solyc02g091860.3 | Solyc02g092070.3 | Solyc03g006030.3 | Solyc03g007760.3 | …	Solyc00g007060.3 | Solyc01g008497.1 | Solyc01g008500.3 | Solyc01g010660.3 | Solyc01g014840.3 | Solyc01g067020.3 | Solyc01g081297.1 | Solyc01g088480.3 | Solyc01g088690.3 | Solyc01g090430.3 | Solyc01g094020.3 | Solyc01g096930.3 | Solyc01g097840.3 | Solyc01g102700.3 | Solyc01g102840.3 | Solyc01g102880.2 | Solyc01g103940.3 | Solyc01g104775.1 | Solyc01g105450.3 | Solyc01g106500.3 | Solyc01g108840.3 | …
GO:0016775	phosphotransferase activity, nitrogenous group as acceptor	18	9	3.47	29	1	0.00327	8	1	Solyc01g010480.3 | Solyc01g059870.3 | Solyc02g071260.3 | Solyc02g083670.3 | Solyc07g056580.3 | Solyc09g089610.3 | Solyc10g044670.2 | Solyc11g006180.2	Solyc05g015610.3
GO:0004673	protein histidine kinase activity	18	9	3.47	30	1	0.00327	8	1	Solyc01g010480.3 | Solyc01g059870.3 | Solyc02g071260.3 | Solyc02g083670.3 | Solyc07g056580.3 | Solyc09g089610.3 | Solyc10g044670.2 | Solyc11g006180.2	Solyc05g015610.3

## Sheet: CC
GO.ID	Term	Annotated	Significant	Expected	Rank in Fisher.classic	Fisher.elim	Fisher.classic	GO_upregulated_genes_count	GO_downregulated_genes_count	GO_upregulated_genes	GO_downregulated_genes
GO:0016021	integral component of membrane	2232	547	427.63	1	6e-15	6e-15	237	310	Solyc01g005590.2 | Solyc01g005980.3 | Solyc01g005990.3 | Solyc01g006430.3 | Solyc01g007130.3 | Solyc01g008240.3 | Solyc01g010640.3 | Solyc01g010860.3 | Solyc01g094700.3 | Solyc01g094720.3 | Solyc01g095180.2 | Solyc01g095980.3 | Solyc01g097910.2 | Solyc01g098190.3 | Solyc01g098640.3 | Solyc01g098740.3 | Solyc01g100610.3 | Solyc01g100910.3 | Solyc01g100920.3 | Solyc01g102610.3 | Solyc01g104030.3 | …	Solyc01g006950.3 | Solyc01g007220.3 | Solyc01g009030.3 | Solyc01g010060.2 | Solyc01g010880.3 | Solyc01g020200.1 | Solyc01g057770.3 | Solyc01g065530.3 | Solyc01g066430.3 | Solyc01g066720.3 | Solyc01g067020.3 | Solyc01g067930.3 | Solyc01g086640.2 | Solyc01g086730.3 | Solyc01g087020.2 | Solyc01g088810.3 | Solyc01g091850.3 | Solyc01g094020.3 | Solyc01g094040.3 | Solyc01g094410.3 | Solyc01g096930.3 | …
GO:0009523	photosystem II	45	28	8.62	6	2.3e-09	2.3e-10	28	0	Solyc01g087040.2 | Solyc01g105030.3 | Solyc01g105050.3 | Solyc02g065400.3 | Solyc02g079950.3 | Solyc03g005760.1 | Solyc03g005770.2 | Solyc03g115900.3 | Solyc04g009420.3 | Solyc04g064670.3 | Solyc05g025600.1 | Solyc05g056050.3 | Solyc05g056070.3 | Solyc06g060340.3 | Solyc06g063360.3 | Solyc06g069730.3 | Solyc07g032640.2 | Solyc07g044860.3 | Solyc07g063600.3 | Solyc09g014520.3 | Solyc09g065910.2 | …
GO:0009522	photosystem I	35	24	6.71	7	1.2e-07	2.3e-10	24	0	Solyc02g069460.3 | Solyc03g005760.1 | Solyc03g005770.2 | Solyc03g115900.3 | Solyc05g056050.3 | Solyc05g056070.3 | Solyc06g054260.1 | Solyc06g063360.3 | Solyc06g069730.3 | Solyc06g082940.3 | Solyc06g082950.3 | Solyc06g083680.3 | Solyc07g063600.3 | Solyc08g006930.3 | Solyc08g013670.3 | Solyc09g014520.3 | Solyc09g063130.3 | Solyc10g005050.3 | Solyc10g006230.3 | Solyc10g007690.3 | Solyc12g006140.2 | …
GO:0010287	plastoglobule	22	15	4.21	9	7e-07	7e-07	15	0	Solyc01g105030.3 | Solyc01g105050.3 | Solyc03g005760.1 | Solyc03g005770.2 | Solyc05g056050.3 | Solyc05g056070.3 | Solyc06g069730.3 | Solyc07g063600.3 | Solyc08g074560.3 | Solyc09g014520.3 | Solyc10g007690.3 | Solyc12g006140.2 | Solyc12g011280.2 | Solyc12g011450.2 | Solyc12g056830.1
GO:0009535	chloroplast thylakoid membrane	130	45	24.91	14	2e-05	2e-05	44	1	Solyc01g009080.3 | Solyc01g096660.3 | Solyc01g105030.3 | Solyc01g105050.3 | Solyc01g106790.3 | Solyc02g065400.3 | Solyc02g069460.3 | Solyc02g080540.1 | Solyc03g005760.1 | Solyc03g005770.2 | Solyc03g007860.1 | Solyc03g062720.3 | Solyc03g114450.3 | Solyc03g115900.3 | Solyc03g115980.1 | Solyc04g010190.1 | Solyc04g082010.1 | Solyc05g056050.3 | Solyc05g056070.3 | Solyc06g054260.1 | Solyc06g060340.3 | …	Solyc04g079730.1
GO:0005886	plasma membrane	590	148	113.04	18	0.00012	0.00012	60	88	Solyc01g007130.3 | Solyc01g096360.3 | Solyc01g098190.3 | Solyc01g098740.3 | Solyc01g100910.3 | Solyc01g100920.3 | Solyc02g080500.3 | Solyc02g081600.3 | Solyc02g086145.1 | Solyc02g091840.3 | Solyc03g025430.1 | Solyc03g045070.1 | Solyc03g080060.1 | Solyc03g081230.1 | Solyc03g113690.1 | Solyc04g007690.3 | Solyc04g077370.2 | Solyc04g078700.3 | Solyc04g079110.1 | Solyc04g079690.3 | Solyc05g005870.3 | …	Solyc01g006950.3 | Solyc01g007220.3 | Solyc01g057770.3 | Solyc01g094020.3 | Solyc01g094040.3 | Solyc01g096930.3 | Solyc01g103490.3 | Solyc01g109110.3 | Solyc01g109710.3 | Solyc01g111440.3 | Solyc01g111980.3 | Solyc01g112080.3 | Solyc02g014030.2 | Solyc02g062100.3 | Solyc02g064680.3 | Solyc02g071780.3 | Solyc02g077290.2 | Solyc02g078530.3 | Solyc02g078600.3 | Solyc02g079220.3 | Solyc02g079570.3 | …
GO:0009538	photosystem I reaction center	10	7	1.92	19	0.00065	0.00065	7	0	Solyc02g069460.3 | Solyc06g054260.1 | Solyc06g082940.3 | Solyc06g082950.3 | Solyc06g083680.3 | Solyc09g063130.3 | Solyc12g044280.2
GO:0005576	extracellular region	165	45	31.61	20	0.0064	0.0064	18	27	Solyc02g080220.3 | Solyc02g091920.3 | Solyc02g092110.3 | Solyc03g123410.1 | Solyc04g009030.3 | Solyc04g082630.3 | Solyc05g007830.3 | Solyc05g047590.3 | Solyc05g052600.3 | Solyc06g049050.3 | Solyc06g051800.3 | Solyc07g054170.3 | Solyc07g055060.3 | Solyc09g009130.3 | Solyc09g010860.3 | Solyc11g010120.2 | Solyc11g066270.2 | Solyc12g094640.2	Solyc01g067740.3 | Solyc01g105070.3 | Solyc01g105810.3 | Solyc01g106830.3 | Solyc01g112000.3 | Solyc02g082920.3 | Solyc02g087190.1 | Solyc03g093080.3 | Solyc03g093120.3 | Solyc03g093130.3 | Solyc03g115070.1 | Solyc03g123620.3 | Solyc04g005050.2 | Solyc04g008730.3 | Solyc04g054690.3 | Solyc04g073990.3 | Solyc04g079440.3 | Solyc04g079450.3 | Solyc05g050130.3 | Solyc07g056000.3 | Solyc08g060970.3 | …
GO:0005618	cell wall	110	32	21.07	21	0.00734	0.00734	15	17	Solyc01g096360.3 | Solyc01g110000.3 | Solyc02g080220.3 | Solyc02g091920.3 | Solyc03g121540.3 | Solyc03g123410.1 | Solyc05g007830.3 | Solyc05g015490.3 | Solyc05g047590.3 | Solyc06g049050.3 | Solyc06g051800.3 | Solyc09g010860.3 | Solyc11g010120.2 | Solyc11g044910.2 | Solyc11g066270.2	Solyc01g105070.3 | Solyc01g112000.3 | Solyc02g065170.3 | Solyc02g090360.3 | Solyc03g093080.3 | Solyc03g093120.3 | Solyc03g093130.3 | Solyc03g123620.3 | Solyc04g008730.3 | Solyc04g073990.3 | Solyc04g082140.3 | Solyc07g056000.3 | Solyc09g075330.3 | Solyc09g090040.3 | Solyc12g008530.2 | Solyc12g011030.2 | Solyc12g017240.2
GO:0019005	SCF ubiquitin ligase complex	17	8	3.26	23	0.00831	0.00831	6	2	Solyc07g005750.3 | Solyc07g008250.3 | Solyc07g066240.3 | Solyc08g060810.3 | Solyc09g074520.3 | Solyc12g009560.2	Solyc02g092990.1 | Solyc12g010900.1
GO:0009654	photosystem II oxygen evolving complex	17	8	3.26	24	0.00831	0.00831	8	0	Solyc01g087040.2 | Solyc02g065400.3 | Solyc02g079950.3 | Solyc04g009420.3 | Solyc04g064670.3 | Solyc07g032640.2 | Solyc07g044860.3 | Solyc12g094720.2
GO:0009579	thylakoid	199	67	38.13	8	0.23276	6.2e-07	65	2	Solyc01g009080.3 | Solyc01g087040.2 | Solyc01g096660.3 | Solyc01g105030.3 | Solyc01g105050.3 | Solyc01g106790.3 | Solyc01g109040.3 | Solyc02g065400.3 | Solyc02g069460.3 | Solyc02g079950.3 | Solyc02g080540.1 | Solyc03g005760.1 | Solyc03g005770.2 | Solyc03g007860.1 | Solyc03g062720.3 | Solyc03g082970.3 | Solyc03g114450.3 | Solyc03g115900.3 | Solyc03g115980.1 | Solyc04g009420.3 | Solyc04g010190.1 | …	Solyc04g073990.3 | Solyc04g079730.1
GO:0071944	cell periphery	719	183	137.75	13	0.3782	6.7e-06	75	108	Solyc01g007130.3 | Solyc01g096360.3 | Solyc01g098190.3 | Solyc01g098740.3 | Solyc01g100910.3 | Solyc01g100920.3 | Solyc01g110000.3 | Solyc02g080220.3 | Solyc02g080500.3 | Solyc02g081600.3 | Solyc02g086145.1 | Solyc02g091840.3 | Solyc02g091920.3 | Solyc03g025430.1 | Solyc03g045070.1 | Solyc03g080060.1 | Solyc03g081230.1 | Solyc03g113690.1 | Solyc03g121540.3 | Solyc03g123410.1 | Solyc04g007690.3 | …	Solyc01g006950.3 | Solyc01g007220.3 | Solyc01g057770.3 | Solyc01g094020.3 | Solyc01g094040.3 | Solyc01g096930.3 | Solyc01g103490.3 | Solyc01g105070.3 | Solyc01g109110.3 | Solyc01g109710.3 | Solyc01g111440.3 | Solyc01g111980.3 | Solyc01g112000.3 | Solyc01g112080.3 | Solyc02g014030.2 | Solyc02g062100.3 | Solyc02g064680.3 | Solyc02g065170.3 | Solyc02g071780.3 | Solyc02g077290.2 | Solyc02g078530.3 | …
GO:0031224	intrinsic component of membrane	2269	554	434.72	2	0.41113	7.7e-15	239	315	Solyc01g005590.2 | Solyc01g005980.3 | Solyc01g005990.3 | Solyc01g006430.3 | Solyc01g007130.3 | Solyc01g008240.3 | Solyc01g010640.3 | Solyc01g010860.3 | Solyc01g094700.3 | Solyc01g094720.3 | Solyc01g095180.2 | Solyc01g095980.3 | Solyc01g097910.2 | Solyc01g098190.3 | Solyc01g098640.3 | Solyc01g098740.3 | Solyc01g100610.3 | Solyc01g100910.3 | Solyc01g100920.3 | Solyc01g102610.3 | Solyc01g104030.3 | …	Solyc01g006950.3 | Solyc01g007220.3 | Solyc01g009030.3 | Solyc01g010060.2 | Solyc01g010880.3 | Solyc01g020200.1 | Solyc01g057770.3 | Solyc01g065530.3 | Solyc01g066430.3 | Solyc01g066720.3 | Solyc01g067020.3 | Solyc01g067930.3 | Solyc01g086640.2 | Solyc01g086730.3 | Solyc01g087020.2 | Solyc01g088810.3 | Solyc01g091850.3 | Solyc01g094020.3 | Solyc01g094040.3 | Solyc01g094410.3 | Solyc01g096930.3 | …
GO:0009534	chloroplast thylakoid	150	49	28.74	16	0.53738	4.9e-05	48	1	Solyc01g009080.3 | Solyc01g096660.3 | Solyc01g105030.3 | Solyc01g105050.3 | Solyc01g106790.3 | Solyc02g065400.3 | Solyc02g069460.3 | Solyc02g080540.1 | Solyc03g005760.1 | Solyc03g005770.2 | Solyc03g007860.1 | Solyc03g062720.3 | Solyc03g114450.3 | Solyc03g115900.3 | Solyc03g115980.1 | Solyc04g010190.1 | Solyc04g082010.1 | Solyc05g014310.3 | Solyc05g056050.3 | Solyc05g056070.3 | Solyc06g054260.1 | …	Solyc04g079730.1
GO:0031976	plastid thylakoid	150	49	28.74	17	0.53738	4.9e-05	48	1	Solyc01g009080.3 | Solyc01g096660.3 | Solyc01g105030.3 | Solyc01g105050.3 | Solyc01g106790.3 | Solyc02g065400.3 | Solyc02g069460.3 | Solyc02g080540.1 | Solyc03g005760.1 | Solyc03g005770.2 | Solyc03g007860.1 | Solyc03g062720.3 | Solyc03g114450.3 | Solyc03g115900.3 | Solyc03g115980.1 | Solyc04g010190.1 | Solyc04g082010.1 | Solyc05g014310.3 | Solyc05g056050.3 | Solyc05g056070.3 | Solyc06g054260.1 | …	Solyc04g079730.1
GO:0044436	thylakoid part	169	59	32.38	10	0.60054	7.5e-07	58	1	Solyc01g009080.3 | Solyc01g087040.2 | Solyc01g096660.3 | Solyc01g105030.3 | Solyc01g105050.3 | Solyc01g106790.3 | Solyc01g109040.3 | Solyc02g065400.3 | Solyc02g069460.3 | Solyc02g079950.3 | Solyc02g080540.1 | Solyc03g005760.1 | Solyc03g005770.2 | Solyc03g007860.1 | Solyc03g062720.3 | Solyc03g114450.3 | Solyc03g115900.3 | Solyc03g115980.1 | Solyc04g009420.3 | Solyc04g010190.1 | Solyc04g064670.3 | …	Solyc04g079730.1
GO:0042651	thylakoid membrane	145	51	27.78	12	0.64725	3.3e-06	50	1	Solyc01g009080.3 | Solyc01g087040.2 | Solyc01g096660.3 | Solyc01g105030.3 | Solyc01g105050.3 | Solyc01g106790.3 | Solyc02g065400.3 | Solyc02g069460.3 | Solyc02g079950.3 | Solyc02g080540.1 | Solyc03g005760.1 | Solyc03g005770.2 | Solyc03g007860.1 | Solyc03g062720.3 | Solyc03g114450.3 | Solyc03g115900.3 | Solyc03g115980.1 | Solyc04g009420.3 | Solyc04g010190.1 | Solyc04g064670.3 | Solyc04g082010.1 | …	Solyc04g079730.1
GO:0016020	membrane	3121	717	597.96	3	0.64957	8.7e-14	313	404	Solyc01g005590.2 | Solyc01g005980.3 | Solyc01g005990.3 | Solyc01g006430.3 | Solyc01g006720.3 | Solyc01g007130.3 | Solyc01g008240.3 | Solyc01g009080.3 | Solyc01g010640.3 | Solyc01g010860.3 | Solyc01g087040.2 | Solyc01g094700.3 | Solyc01g094720.3 | Solyc01g095180.2 | Solyc01g095980.3 | Solyc01g096360.3 | Solyc01g096660.3 | Solyc01g097910.2 | Solyc01g098190.3 | Solyc01g098640.3 | Solyc01g098740.3 | …	Solyc01g006950.3 | Solyc01g007220.3 | Solyc01g009030.3 | Solyc01g010060.2 | Solyc01g010880.3 | Solyc01g020200.1 | Solyc01g057770.3 | Solyc01g065530.3 | Solyc01g066430.3 | Solyc01g066720.3 | Solyc01g067020.3 | Solyc01g067720.3 | Solyc01g067930.3 | Solyc01g086640.2 | Solyc01g086730.3 | Solyc01g087020.2 | Solyc01g088810.3 | Solyc01g091850.3 | Solyc01g094020.3 | Solyc01g094040.3 | Solyc01g094410.3 | …
GO:0034357	photosynthetic membrane	162	57	31.04	11	0.84591	8.7e-07	56	1	Solyc01g009080.3 | Solyc01g087040.2 | Solyc01g096660.3 | Solyc01g105030.3 | Solyc01g105050.3 | Solyc01g106790.3 | Solyc02g065400.3 | Solyc02g069460.3 | Solyc02g079950.3 | Solyc02g080540.1 | Solyc03g005760.1 | Solyc03g005770.2 | Solyc03g007860.1 | Solyc03g062720.3 | Solyc03g114450.3 | Solyc03g115900.3 | Solyc03g115980.1 | Solyc04g009420.3 | Solyc04g010190.1 | Solyc04g064670.3 | Solyc04g082010.1 | …	Solyc04g079730.1
GO:0044425	membrane part	2499	591	478.79	4	0.96299	6.1e-13	256	335	Solyc01g005590.2 | Solyc01g005980.3 | Solyc01g005990.3 | Solyc01g006430.3 | Solyc01g007130.3 | Solyc01g008240.3 | Solyc01g010640.3 | Solyc01g010860.3 | Solyc01g087040.2 | Solyc01g094700.3 | Solyc01g094720.3 | Solyc01g095180.2 | Solyc01g095980.3 | Solyc01g097910.2 | Solyc01g098190.3 | Solyc01g098640.3 | Solyc01g098740.3 | Solyc01g100610.3 | Solyc01g100910.3 | Solyc01g100920.3 | Solyc01g102610.3 | …	Solyc01g006950.3 | Solyc01g007220.3 | Solyc01g009030.3 | Solyc01g010060.2 | Solyc01g010880.3 | Solyc01g020200.1 | Solyc01g057770.3 | Solyc01g065530.3 | Solyc01g066430.3 | Solyc01g066720.3 | Solyc01g067020.3 | Solyc01g067720.3 | Solyc01g067930.3 | Solyc01g086640.2 | Solyc01g086730.3 | Solyc01g087020.2 | Solyc01g088810.3 | Solyc01g091850.3 | Solyc01g094020.3 | Solyc01g094040.3 | Solyc01g094410.3 | …
GO:0009521	photosystem	69	38	13.22	5	1	2.7e-11	38	0	Solyc01g087040.2 | Solyc01g105030.3 | Solyc01g105050.3 | Solyc02g065400.3 | Solyc02g069460.3 | Solyc02g079950.3 | Solyc03g005760.1 | Solyc03g005770.2 | Solyc03g115900.3 | Solyc04g009420.3 | Solyc04g064670.3 | Solyc05g025600.1 | Solyc05g056050.3 | Solyc05g056070.3 | Solyc06g054260.1 | Solyc06g060340.3 | Solyc06g063360.3 | Solyc06g069730.3 | Solyc06g082940.3 | Solyc06g082950.3 | Solyc06g083680.3 | …
GO:0055035	plastid thylakoid membrane	130	45	24.91	15	1	2e-05	44	1	Solyc01g009080.3 | Solyc01g096660.3 | Solyc01g105030.3 | Solyc01g105050.3 | Solyc01g106790.3 | Solyc02g065400.3 | Solyc02g069460.3 | Solyc02g080540.1 | Solyc03g005760.1 | Solyc03g005770.2 | Solyc03g007860.1 | Solyc03g062720.3 | Solyc03g114450.3 | Solyc03g115900.3 | Solyc03g115980.1 | Solyc04g010190.1 | Solyc04g082010.1 | Solyc05g056050.3 | Solyc05g056070.3 | Solyc06g054260.1 | Solyc06g060340.3 | …	Solyc04g079730.1
GO:0030312	external encapsulating structure	110	32	21.07	22	1	0.00734	15	17	Solyc01g096360.3 | Solyc01g110000.3 | Solyc02g080220.3 | Solyc02g091920.3 | Solyc03g121540.3 | Solyc03g123410.1 | Solyc05g007830.3 | Solyc05g015490.3 | Solyc05g047590.3 | Solyc06g049050.3 | Solyc06g051800.3 | Solyc09g010860.3 | Solyc11g010120.2 | Solyc11g044910.2 | Solyc11g066270.2	Solyc01g105070.3 | Solyc01g112000.3 | Solyc02g065170.3 | Solyc02g090360.3 | Solyc03g093080.3 | Solyc03g093120.3 | Solyc03g093130.3 | Solyc03g123620.3 | Solyc04g008730.3 | Solyc04g073990.3 | Solyc04g082140.3 | Solyc07g056000.3 | Solyc09g075330.3 | Solyc09g090040.3 | Solyc12g008530.2 | Solyc12g011030.2 | Solyc12g017240.2
