# Supplementary figures and images for: Transcriptome Dynamics Underlying Planticine®-Induced Defense Responses of Tomato (Solanum lycopersicum L.) to Biotic Stresses
Source: MDPI journal article supplement (doi:10.3390/ijms24076494), 2023-03-30

**Supplementary Figure S1.** Pearson correlation analysis between all biological RNA samples

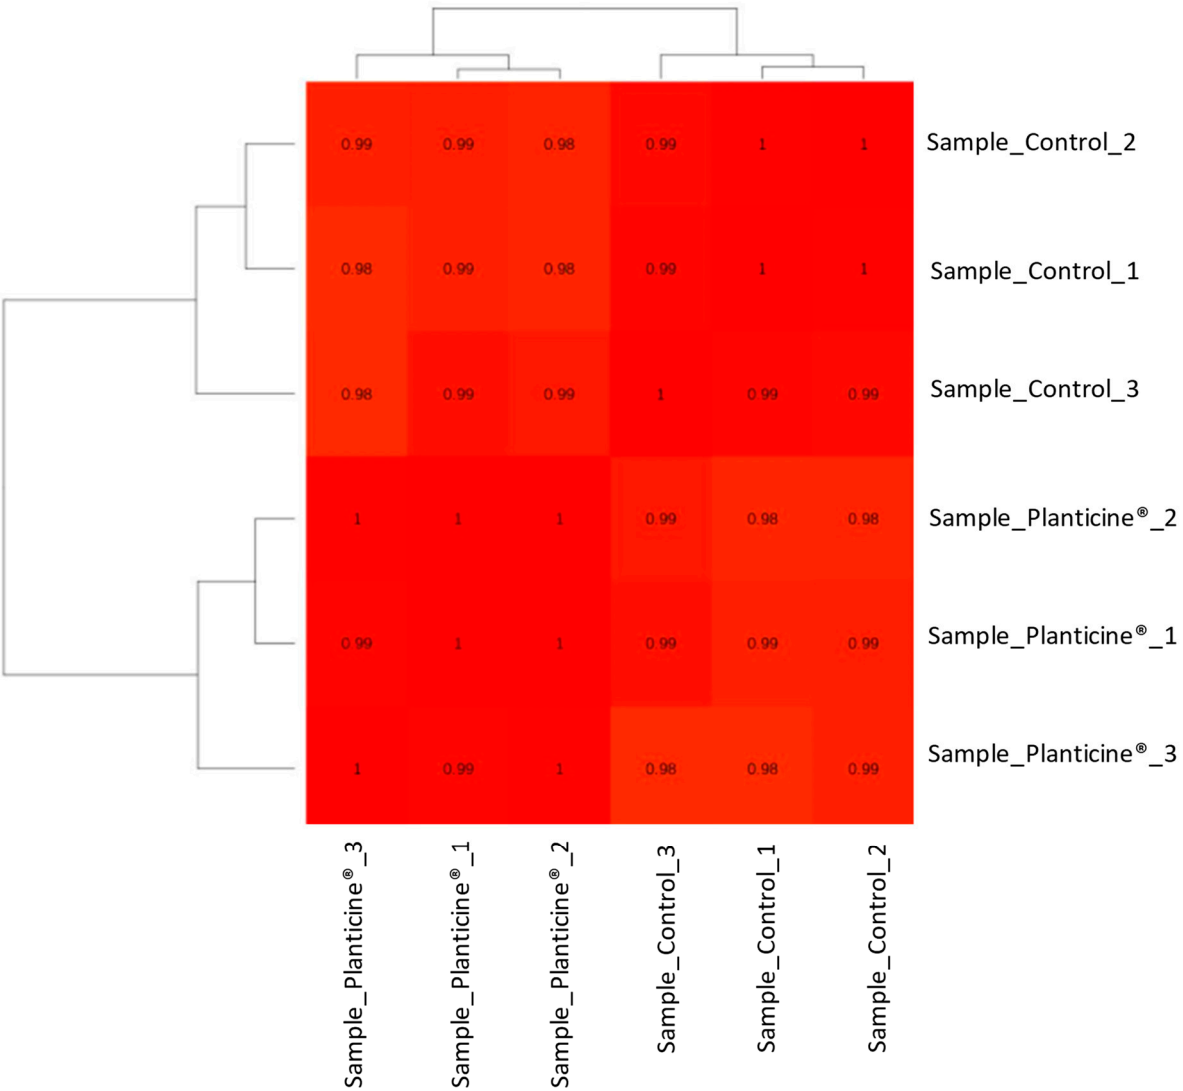

Supplement: s1 [file s1]
